# Supplementary material
Source: publisher figshare collection journal article supplement (https://acs.figshare.com/ndownloader/files/4854763)

# **Inverse Electron-Demand-[4+2]-Cycloadditions of Ynamides: Access to Novel Pyridine Scaffolds**

Guillaume Duret, Robert Quinlan, Rainer E. Martin, Philippe Bissere, Markus Neuburger, Vincent Gandon\* and Nicolas Blanchard\*

**Supporting information**

## **Table of contents**

|                                                    |              |
|----------------------------------------------------|--------------|
| <b>1. Material and methods</b>                     | <b>SI-3</b>  |
| <b>2. Experimental details and analytical data</b> | <b>SI-3</b>  |
| <b>3. NMR Spectra</b>                              | <b>SI-26</b> |

## 1. Material and methods

NMR spectra were recorded on Bruker AV 300 or AV 400 spectrometer at 300 MHz or 400 MHz for  $^1\text{H}$  NMR, at 75 or 100 MHz for  $^{13}\text{C}$  NMR and at 376 MHz or 282 MHz for  $^{19}\text{F}$  NMR. The spectra were calibrated using undeuterated solvent as internal reference, unless otherwise indicated. The following abbreviations were used to explain multiplicities: s = singlet, d = doublet, t = triplet, q = quartet, m = multiplet, and b = broad. Coupling constant ( $J$ ) were reported in Hertz. High resolution mass spectra (HRMS) in positive mode were recorded using a 6520 series quadrupole time-of-flight (Q-TOF) mass spectrometer (Agilent) fitted with a multimode ion source (in mixed mode that enables both electrospray ionization, ESI, and atmospheric pressure chemical ionization, APCI). Samples were directly infused into the source using 50/50-methanol/formic acid 0.2 % in water. Melting points were recorded on a Büchi 510 melting point apparatus. Tetrahydrofuran (THF) was distilled under nitrogen from sodium-benzophenone. Reagents were purchased from Aldrich, Apollo Scientific or Alfa Aesar and used without further purification, unless otherwise noted. All non-commercially available homopropargylic alcohols were prepared using literature procedure.<sup>1</sup> Microwave reactions were performed in a CEM Intelligent Explorer (Model 541416) microwave. Yields refer to chromatographically and spectroscopically ( $^1\text{H}$ ,  $^{13}\text{C}$  and  $^{19}\text{F}$  NMR) homogeneous materials, unless otherwise noted. Reactions were monitored by thin-layer chromatography (TLC) carried out on Merck TLC silica gel 60 F254 aluminum plates, using UV light or potassium permanganate as visualizing agents. All separations were performed by chromatography on Merck silica gel 60 (40-63  $\mu\text{m}$ ), on a Combiflash Companion from Teledyne Isco or by preparative TLC chromatography (layer thickness of 500  $\mu\text{m}$ ).

## 2. Experimental details and analytical data

### General procedure A: SNAr of 2-chloro-4-trifluoromethylpyrimidine.

Sodium hydride (1.4 eq., 1.1 g, 28.0 mmol) was suspended in THF (65 mL, 0.3 M) at 0 °C under nitrogen in a round bottom flask equipped with a magnetic stirring bar. Homopropargylic alcohol (1.4 eq., 2.1 mL, 28.0 mmol) was then added and the solution left stirring for 30 minutes. 2-Chloro-4-trifluoromethylpyrimidine **1a** (1 eq., 2.4 mL, 20.0 mmol) was added dropwise and a colour change from yellow to deep red was observed. Once the addition was complete, the solution was left stirring at room temperature for 17 hours until complete consumption of the starting materials as indicated by TLC. The reaction mixture was concentrated in vacuo and quenched with water and the aqueous phase was extracted with EtOAc. The combined organic phases were dried over  $\text{MgSO}_4$ , filtered and concentrated in vacuo. The resulting crude product was purified using flash chromatography on silica gel (Petroleum ether/EtOAc: 7:3). **2a** was isolated as colourless oil (4 g, 94 %).

### General procedure B: Synthesis of ynamide **3f** using Stahl's conditions.

In a round bottomed flask flushed with oxygen and equipped with a magnetic stirrer bar were placed oxazolidinone (5 eq., 262 mg, 3.0 mmol),  $\text{CuCl}_2$  (2 eq., 161 mg, 1.2 mmol) and  $\text{Cs}_2\text{CO}_3$  (2 eq., 392 mg, 1.2 mmol). DMSO (2.9 mL) was then added via syringe and the suspension was heated at 70 °C, under an atmosphere of oxygen (balloon). A solution of alkyne **2f** (1 eq., 100 mg, 0.6 mmol) in DMSO (2.9 mL) was then slowly added to the reaction mixture via syringe pump addition over 4 hours and then stirring was continued at 70 °C until TLC showed complete consumption of alkyne **2f**. The reaction mixture was allowed to cool to room temperature and pyridine (2.4 mL, 50 eq) was added and the solution was stirred for ten more minutes. The reaction mixture was quenched with water and the aqueous layer was extracted using AcOEt. The combined

<sup>1</sup> a) F. Lehrich, H. Hopf, J. Grunenberg, *Eur. J. Org. Chem.* **2011**, 2011, 2705-2718; b) J. Fu, H. Shang, Z. Wang, L. Chang, W. Shao, Z. Yang, Y. Tang, *Angew. Chem. Int. Ed.* **2013**, 52, 4198-4202; c) T. O. Painter, J. R. Bunn, F. J. Schoenen, J. T. Douglas, V. W. Day, C. Santini, *J. Org. Chem.* **2013**, 78, 3720-3730.

organic phases were washed with water and brine, dried over  $\text{MgSO}_4$ , filtered, and concentrated in vacuo. The resulting crude product was purified using flash chromatography on silica gel (Petroleum ether/EtOAc: 8/2). **3f** was isolated as a white solid (116 mg, 77 %).

#### General procedure C: [4+2] cycloaddition of ynamide **3a** under microwave conditions.

In a microwaveable tube equipped with a magnetic stirrer bar, ynamide **3a** (1 eq., 30 mg, 0.01 mmol) was dissolved in sulfolane (2.4 ml, 0.04 M) that had been dried over molecular sieves (4 Å). The tube was sealed, placed in the microwave and heated at either 210 °C for 30 minutes or 255 °C for 1 minute, both with a maximal power of 300 W. After completion of the reaction, the mixture was then quenched with warm saturated solution of  $\text{K}_2\text{CO}_3$  (50 °C). The aqueous phase was extracted with methyl *t*-butyl ether. The combined organic phases were washed warm water (50 °C), dried over  $\text{MgSO}_4$ , filtered, and concentrated in vacuo. The resulting crude product was purified using flash chromatography on silica gel (Petroleum Ether/EtOAc: 7/3). **4a** was isolated as a yellow solid (16 mg, 60 %).

#### 2-(But-3-ynyloxy)-4-(trifluoromethyl)pyrimidine (**2a**)

**Compound 2a** was obtained from the corresponding 2-Chloro-4-trifluoromethylpyrimidine **1a** (3.6 g, 2.38 mL, 19.7 mmol) following the general procedure A. After purification of the crude material by column chromatography (Petroleum ether/EtOAc: 7:3), **2a** was isolated as colorless oil (3.33 g, 78 % yield).

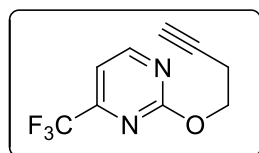

$\text{C}_9\text{H}_7\text{F}_3\text{N}_2\text{O}$   
216,16 g/mol

$^1\text{H}$  NMR ( $\text{CDCl}_3$ , 300 MHz, ppm)  $\delta$ : 8.78 (d,  $J$  = 4.9 Hz, 1H); 7.29 (d,  $J$  = 4.9 Hz, 1H); 4.6 (t,  $J$  = 7.1 Hz, 2H); 2.76 (dt,  $J$  = 2.6 Hz, 7.1 Hz, 2H); 2.04 (t,  $J$  = 2.6 Hz, 1H)

$^{13}\text{C}$  NMR ( $\text{CDCl}_3$ , 75 MHz, ppm)  $\delta$ : 165.2; 162.3; 157.6 (q,  $J$  = 36.8 Hz, CH); 120.2 (q,  $J$  = 275.0 Hz,  $\text{CF}_3$ ); 110.9; 79.9; 70.3, 66.1; 19.0

$^{19}\text{F}$  NMR ( $\text{CDCl}_3$ , 376MHz, ppm)  $\delta$ : -65.8 ppm

HRMS-ESI  $m/z$  calcd for  $[\text{M}+\text{H}]^+$  217.0583, found 217.0578

#### 2-(But-3-ynyloxy)-5-fluoropyrimidine (**2f**)

**Compound 2f** was obtained from **1f** (400 mg, 0.2 mL, 3.02 mmol) following the general procedure A. After purification of the crude material by column chromatography (Petroleum ether/EtOAc: 8:2), **2f** was isolated as colorless oil (396 mg, 78 % yield). The spectroscopic data obtained for this compound are in agreement with the literature.<sup>2</sup>

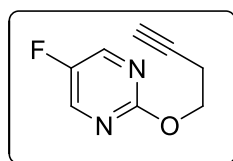

$\text{C}_8\text{H}_7\text{FN}_2\text{O}$   
166,15 g/mol

$^1\text{H}$  NMR ( $\text{CDCl}_3$ , 300 MHz, ppm)  $\delta$ : 8.78 (s, 2H); 4.58 (t,  $J$  = 6.9 Hz, 2H); 2.76 (dt,  $J$  = 2.7 Hz, 7.09 Hz, 2H); 2.04 (t,  $J$  = 2.7 Hz, 1H)

#### 2-(But-3-ynyloxy)-5-chloropyrimidine (**2i**)

**Compound 2i** was obtained from **1i** (700 mg, 4.7 mmol) following the general procedure A. After purification of the crude material by column chromatography (Petroleum ether/EtOAc: 7:3), **2a** was isolated as colorless oil (787 mg, 92 % yield).

The spectroscopic data obtained for this compound are in agreement with the literature.<sup>2</sup>

<sup>2</sup> R. E. Martin, F. Morawitz, C. Kuratli, A. M. Alker, A. I. Alanine, *Eur. J. Org. Chem.* **2012**, 47-52.



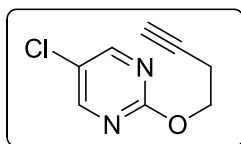

$C_8H_7ClN_2O$   
182,61 g/mol

$^1H$  NMR ( $CDCl_3$ , 300 MHz, ppm)  $\delta$ : 8.45 (s, 2H); 4.46 (t,  $J$  = 7.1 Hz, 2H); 2.71 (dt,  $J$  = 2.7 Hz, 7.1 Hz, 2H); 2.02 (t,  $J$  = 2.7 Hz, 1H)

#### 2-(But-3-yn-1-yloxy)-5-(trifluoromethyl)pyrimidine (**2j**)

**Compound 2j** was obtained from the corresponding 2-Chloro-5-trifluoromethylpyrimidine **1j** (250 mg, 1.37 mmol) following the general procedure A. After purification of the crude material by column chromatography (Petroleum ether/EtOAc: 7:3), **2j** was isolated as colorless oil (239 mg, 81 % yield).

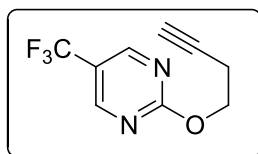

$C_9H_7F_3N_2O$   
216,16 g/mol

$^1H$  NMR ( $CDCl_3$ , 300 MHz, ppm)  $\delta$ : 8.78 (s, 2H); 4.58 (t,  $J$  = 7.0 Hz, 2H); 2.76 (dt,  $J$  = 2.7 Hz, 7.0 Hz, 2H); 2.04 (t,  $J$  = 2.7 Hz, 1H)

$^{13}C$  NMR ( $CDCl_3$ , 100 MHz, ppm)  $\delta$ : 166.8; 157.5 (q,  $J$  = 3.3 Hz, CH); 122.3 (q,  $J$  = 270.6 Hz,  $CF_3$ ); 119.7 (q,  $J$  = 34.0 Hz, CH); 79.9; 70.7; 66.5; 19.3

$^{19}F$  NMR ( $CDCl_3$ , 376 MHz, ppm)  $\delta$ : -61.4 ppm

**HRMS-ESI**  $m/z$  calcd for  $[M+H]^+$  217.0583, found 217.0576

#### 2-(But-3-yn-1-yloxy)-5-fluoro-4-(thiophen-3-yl)pyrimidine (**2k**)

**Compound 2k** was obtained from 2-(but-3-yn-1-yloxy)-5-fluoro-4-(thiophen-3-yl)pyrimidine (200 mg, 0.932 mmol) following the general procedure A. After purification of the crude material by column chromatography (Petroleum ether/EtOAc: 9:1), **2k** was isolated as colorless oil (185 mg, 84 % yield).

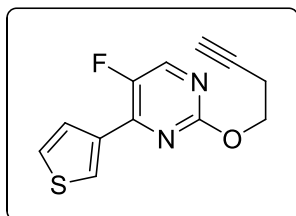

$C_{12}H_9FN_2OS$   
248,28 g/mol

$^1H$  NMR ( $CDCl_3$ , 400 MHz, ppm)  $\delta$ : 8.37 (d,  $J$  = 3.0 Hz, 1H); 8.27 (m, 1H); 7.86 (d,  $J$  = 4.8 Hz, 1 H); 7.40 (dd,  $J$  = 3.0 Hz, 5.3 Hz, 1 H); 4.51 (t,  $J$  = 7.3 Hz, 2H); 2.75 (dt,  $J$  = 2.6 Hz, 7.3 Hz, 2H); 2.04 (t, 2.6 Hz, 1H)

$^{13}C$  NMR ( $CDCl_3$ , 100 MHz, ppm)  $\delta$ : 160.8; 151.6 (d,  $J$  = 259 Hz,  $CF_3$ ); 149.3; 147.7; 135.1; 130.59 (d,  $J$  = 11.0 Hz, CH); 127.7 (d,  $J$  = 5.1 Hz, CH); 126.3; 80.4; 70.4; 66.0; 19.4

$^{19}F$  NMR ( $CDCl_3$ , 376 MHz, ppm)  $\delta$ : -148.1 ppm

**HRMS-EIC**  $m/z$  calcd for  $[M+H]^+$  249.0472, found 249.0485

#### 2-(But-3-yn-1-yloxy)-5-fluoro-4-phenylpyrimidine (**2l**)

**Compound 2l** was obtained from 2-chloro-5-fluoro-4-phenylpyrimidine<sup>3</sup> (284 mg, 1.43 mmol) following the general procedure A. After purification of the crude material by column chromatography (Petroleum ether/EtOAc: 9:1), **2l** was isolated as colorless oil (234 mg, 71 % yield).

<sup>3</sup> G. I. Stevenson, A. Garavelas, K. L. Cosgrove, K. A. Reynolds, N. C. Franken, L. R. Whittell, H. P. Wijesekera, WO2014/41349 A1

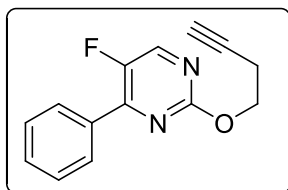

$C_{14}H_{11}FN_2O$   
242,25 g/mol

$^1H$  NMR ( $CDCl_3$ , 300 MHz, ppm)  $\delta$ : 8.42 (d,  $J$  = 3.1 Hz, 1H); 8.15-8.12 (m, 2H); 7.53-7.49 (m, 3H); 4.55 (t,  $J$  = 7.3 Hz, 2H); 2.77 (dt, 3.2 Hz, 7.3 Hz, 2H); 2.05 (t,  $J$  = 3.2 Hz, 1H)

#### 2-(But-3-ynyloxy)-5-fluoro-4-(4-fluorophenyl)pyrimidine (2m)

**Compound 2m** was obtained from 2-chloro-5-fluoro-4-(4-fluorophenyl)pyrimidine<sup>3</sup> (500 mg, 2.21 mmol) following the general procedure A. After purification of the crude material by column chromatography (Petroleum ether/EtOAc: 9:1), **2m** was isolated as colorless oil (274 mg, 48 % yield).

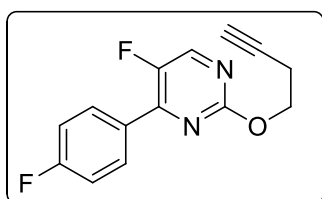

$C_{14}H_{10}F_2N_2O$   
260,24 g/mol

$^1H$  NMR ( $CDCl_3$ , 300 MHz, ppm)  $\delta$ : 8.36 (d,  $J$  = 3.2 Hz, 1H); 8.12 (dd,  $J$  = 5.5, 8.5 Hz, 2H); 7.14 (t,  $J$  = 8.5 Hz, 2H); 4.48 (t,  $J$  = 7.4 Hz, 2H); 2.72 (d,  $J$  = 2.7, 7.4 Hz, 2H), 2.03 (t,  $J$  = 2.7 Hz, 1H)

#### 2-(Pent-4-ynyloxy)-4-(trifluoromethyl)pyrimidine (2n)

**Compound 2n** was obtained from the corresponding 2-chloro-4-trifluoromethylpyrimidine **1a** (1 g, 0.66 mL, 7.67 mmol) following the general procedure A. After purification of the crude material by column chromatography (Petroleum ether/EtOAc: 7:3), **2n** was isolated as colorless oil (1.01 g, 80 % yield).

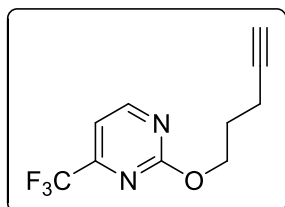

$C_{10}H_9F_3N_2O$   
230,19 g/mol

$^1H$  NMR ( $CDCl_3$ , 300 MHz, ppm)  $\delta$ : 8.78 (d,  $J$  = 4.9 Hz, 1H); 7.30 (d,  $J$  = 4.9 Hz, 1H); 4.57 (t,  $J$  = 6.9 Hz, 2H); 2.76 (dt,  $J$  = 3.1, 6.9 Hz, 2H); 2.04 (m, 2H), 1.9 (t,  $J$  = 2.1 Hz, 1H)

$^{13}C$  NMR ( $CDCl_3$ , 100 MHz, ppm)  $\delta$ : 165.7; 162.2; 157.8 (q,  $J$  = 39.0 Hz, CH); 120.3 (q,  $J$  = 275.0 Hz,  $CF_3$ ); 110.6 (d,  $J$  = 2.2 Hz, CH); 83.2; 69.2; 67.1; 27.8; 15.3

$^{19}F$  NMR ( $CDCl_3$ , 376 MHz, ppm)  $\delta$ : -71.4 ppm

HRMS-EIC  $m/z$  calcd for  $[M+H]^+$  231.0740, found 231.0727

#### 2-(Hex-5-ynyloxy)-4-(trifluoromethyl)pyrimidine (2o)

**Compound 2o** was obtained from the corresponding 2-Chloro-4-trifluoromethylpyrimidine **1a** (200 mg, 0.13 mL, 3.84 mmol) following the general procedure A. After purification of the crude material by column chromatography (Petroleum ether/EtOAc: 7:3), **2o** was isolated as colorless oil (256 mg, 96 % yield).

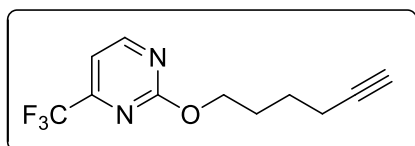

$C_{11}H_{11}F_3N_2O$   
244,21 g/mol

$^1H$  NMR ( $CDCl_3$ , 300 MHz, ppm)  $\delta$ : 8.77 (d,  $J$  = 4.8 Hz, 1H), 7.26 (d,  $J$  = 4.8 Hz, 1H), 4.47 (t,  $J$  = 6.4 Hz, 2H), 2.29 (td,  $J$  = 2.6 Hz, 6.9 Hz, 2H), 1.97 (t,  $J$  = 2.6 Hz, 1H), 1.80-1.72 (m, 4H)

$^{13}C$  NMR ( $CDCl_3$ , 100 MHz, ppm)  $\delta$ : 165.7; 162.2; 157.8 (q,  $J$  = 35.2 Hz, CH); 120.3 (q,  $J$  = 275.6 Hz,  $CF_3$ ); 110.4 (d,  $J$  = 3.3 Hz, CH); 83.9; 68.9; 68.1; 27.8; 25.0; 18.2

$^{19}F$  NMR ( $CDCl_3$ , 376 MHz, ppm)  $\delta$ : -71.5 ppm

HRMS-EIC  $m/z$  calcd for  $[M+H]^+$  245.0812, found 258.0886

#### 2-(2-Ethynylcyclohexyloxy)-4-(trifluoromethyl)pyrimidine (**2p**)

**Compound 2p** was obtained from the corresponding 2-chloro-4-trifluoromethylpyrimidine **1a** (472 mg, 0.31 mL, 2.6 mmol) following the general procedure A. After purification of the crude material by column chromatography (Petroleum ether/EtOAc: 7:3), **2p** was isolated as colorless oil (554 mg, 79 % yield).

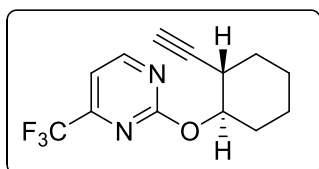

$C_{13}H_{13}F_3N_2O$   
270,25 g/mol

$^1H$  NMR ( $CDCl_3$ , 300 MHz, ppm)  $\delta$ : 8.75 (d,  $J$  = 4.9 Hz, 1H), 7.24 (d,  $J$  = 4.9 Hz, 1H), 5.19 (td,  $J$  = 3.6 Hz, 8.1 Hz, 1H), 2.79-2.74 (m, 1H), 2.18-2.12 (m, 2H), 2.03 (d,  $J$  = 2.4 Hz, 1H), 1.60-1.55 (m, 2H), 1.43-1.36 (m, 4H)

$^{13}C$  NMR ( $CDCl_3$ , 100 MHz, ppm)  $\delta$ : 165.3; 162.2; 157.9 (q,  $J$  = 35.2 Hz, CH); 140.8 (q,  $J$  = 275.1 Hz,  $CF_3$ ); 110.5; 85.1; 77.9; 70.3; 34.1; 30.1; 29.4; 23.7; 23.0

$^{19}F$  NMR ( $CDCl_3$ , 376 MHz, ppm)  $\delta$ : -71.4

HRMS-ESI  $m/z$  calcd for  $[M+H]^+$  271.1140, found 271.1140

#### 2-(1-(Prop-2-ynyl)cyclobutoxy)-4-(trifluoromethyl)pyrimidine (**2r**)

**Compound 2r** was obtained from the corresponding 2-chloro-4-trifluoromethylpyrimidine **1a** (828 mg, 0.55 mL, 4.5 mmol) following the general procedure A. After purification of the crude material by column chromatography (Petroleum ether/EtOAc: 85:15), **2r** was isolated as colorless oil (900 mg, 90 % yield).

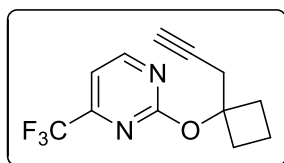

$C_{12}H_{11}F_3N_2O$   
256,22 g/mol

$^1H$  NMR ( $CDCl_3$ , 300 MHz, ppm)  $\delta$ : 8.72 (d,  $J$  = 4.7 Hz, 1H), 7.22 (d,  $J$  = 4.7 Hz, 1H), 3.02 (d,  $J$  = 2.8 Hz, 2H), 2.45 (t,  $J$  = 9.1 Hz, 4H), 1.93 (t,  $J$  = 2.8 Hz, 1H), 1.88-1.80 (m, 1H), 1.78-1.68 (m, 1H)

$^{13}C$  NMR ( $CDCl_3$ , 100 MHz, ppm)  $\delta$ : 163.9, 162.0, 157.3 (q,  $J$  = 36.7 Hz, CH), 121.4 (q,  $J$  = 275.1 Hz,  $CF_3$ ), 110.2 (q,  $J$  = 2.9 Hz, CH), 82.0, 79.6, 69.8, 33.3, 25.4, 13.3

$^{19}F$  NMR ( $CDCl_3$ , 376 MHz, ppm)  $\delta$ : -71.6

HRMS-ESI  $m/z$  calcd for  $[M]^+$  256.0823, found 256.0829

2-(1-(Prop-2-ynyl)cyclohexyloxy)-4-(trifluoromethyl)pyrimidine (2s)

**Compound 2s** was obtained from the corresponding 2-chloro-4-trifluoromethylpyrimidine **1a** (396 mg, 0.26 mL, 2.17 mmol) following the general procedure A. After purification of the crude material by column chromatography (Petroleum ether/EtOAc: 7:3), **2s** was isolated as colorless oil (309 mg, 50 % yield).

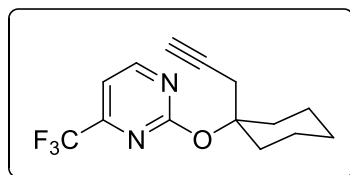

$C_{14}H_{15}F_3N_2O$   
284,28 g/mol

$^1H$  NMR ( $CDCl_3$ , 300 MHz, ppm)  $\delta$ : 8.74 (d,  $J$  = 4.8 Hz, 1H); 7.23 (d,  $J$  = 4.8 Hz, 1H); 3.11 (d,  $J$  = 2.8 Hz, 2H); 2.49 (d,  $J$  = 12.1 Hz, 2H); 1.94 (t,  $J$  = 2.8 Hz, 1H); 1.76-1.26 (m, 8H)

$^{13}C$  NMR ( $CDCl_3$ , 100 MHz, ppm)  $\delta$ : 165.0; 162.1; 167.5 (q, 32.3 Hz, CH); 120.4 (q, 273.6 Hz,  $CF_3$ ); 110.4; 84.2; 80.1; 71.1; 34.3; 28.0; 25.6; 22.0

$^{19}F$  NMR ( $CDCl_3$ , 376 MHz, ppm)  $\delta$ : -71.4

**HRMS-ESI**  $m/z$  calcd for  $[M]^+$  284.1136, found 284.1145

2-(But-3-ynylthio)-4-(trifluoromethyl)pyrimidine (2v)

In a 25 mL dried sealed tube equipped with a magnetic stirring bar were placed 4-(trifluoromethyl)-2-pyrimidinethiol (1 eq., 400 mg, 2.22 mmol) and  $K_2CO_3$  (2 eq., 614 mg, 4.44 mmol) dissolved in THF (4.4 mL). Then 4-bromobut-1-yne (1 eq., 295 mg, 2.22 mmol) was added to the stirring mixture which was allowed to react at 80 °C for 17 hours until complete consumption of the starting materials as indicated by TLC. The reaction mixture was concentrated in vacuo and quenched with water and the aqueous phase was extracted with EtOAc. The combined organic phases were dried over  $MgSO_4$ , filtered and concentrated in vacuo. The resulting crude product was purified using flash chromatography on silica gel (Petroleum ether/EtOAc: 6:4). **2v** was isolated as colourless oil

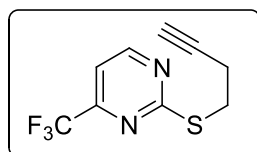

$C_9H_7F_3N_2S$   
232,23 g/mol

$^1H$  NMR ( $CDCl_3$ , 300 MHz, ppm)  $\delta$ : 8.75 (d,  $J$  = 5.0 Hz, 1H); 7.28 (d,  $J$  = 5.0 Hz, 1H); 3.32 (t,  $J$  = 7.2 Hz, 2H); 2.6 (dt,  $J$  = 2.6, 7.2 Hz); 2.04 (t,  $J$  = 2.6 Hz, 1H)

$^{13}C$  NMR ( $CDCl_3$ , 100 MHz, ppm)  $\delta$ : 173.7; 159.8; 156.0 (q,  $J$  = 36.2 Hz); 120.4 (q,  $J$  = 274.4 Hz); 112.2 (d,  $J$  = 2.7 Hz); 82.3; 70.1; 30.3; 19.2

$^{19}F$  NMR ( $CDCl_3$ , 376 MHz, ppm)  $\delta$ : - 71.4

**HRMS-EIC**  $m/z$  calcd for  $[M+H]^+$  233.0355, found 233.0357

N-(But-3-ynyl)-N-(4-(trifluoromethyl)pyrimidin-2-yl)acetamide (2w)

Sodium hydride (1 eq., 116 mg, and 2.9 mmol) was suspended in THF (9.6 mL, 0.3 M) at 0 °C under nitrogen in a round bottom flask equipped with a magnetic stirring bar. 4-Aminobut-3-yne (1 eq., 200 mg, 2.9 mmol) was then added and the solution left stirring for 30 minutes. 2-Chloro-4-trifluoromethylpyrimidine **1a** (1 eq., 0.35 mL, 2.9 mmol) was added dropwise. Once the addition was complete, the solution was left stirring at 50 °C for 17 hours until complete consumption of the starting materials as indicated by TLC. The reaction mixture was concentrated in vacuo and quenched with water and the aqueous phase was extracted with EtOAc. The combined organic phases were dried over  $MgSO_4$ , filtered and concentrated in vacuo. The resulting crude was then dissolved in acetic anhydride (18 mL, 0.2 M) in a 25 mL dried sealed tube equipped with a magnetic stirring bar. A drop of sulfuric acid was added and the mixture was allowed to stir overnight at 80 °C. When complete consumption of the starting materials as indicated by TLC was observed the reaction was quenched with water and the aqueous phase was extracted with EtOAc. The combined organic phases were dried over  $MgSO_4$ , filtered and

concentrated in vacuo. The resulting crude product was purified using flash chromatography on silica gel (Petroleum ether/EtOAc: 6:4). **2w** was isolated as colourless oil (513 mg, 55 % over two steps)

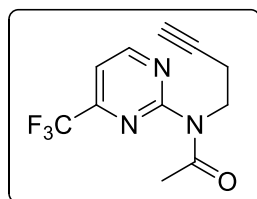

$C_{11}H_{10}F_3N_3O$   
257,21 g/mol

$^1H$  NMR ( $CDCl_3$ , 300 MHz, ppm)  $\delta$ : 8.87 (d,  $J$  = 5.0 Hz, 1H); 7.34 (d,  $J$  = 4.9 Hz, 1H); 4.32 (t,  $J$  = 7.3 Hz, 2H); 2.59 (dt, 2.8, 7.2 Hz, 2H); 2.54 (s, 3H); 1.9 (t,  $J$  = 2.1 Hz, 1H)

$^{13}C$  NMR ( $CDCl_3$ , 100 MHz, ppm)  $\delta$ : 172.6; 161.4; 160.7; 156.5 (t,  $J$  = 35.7 Hz); 120.3 (q,  $J$  = 273.9 Hz); 111.8 (d,  $J$  = 2.2 Hz); 81.5; 70.1; 44.8; 26.8; 18.4

$^{19}F$  NMR ( $CDCl_3$ , 376 MHz, ppm)  $\delta$ : -71.3

HRMS-EIC  $m/z$  calcd for  $[M+H]^+$  258.0849, found 258.0856

### 3-(4-(4-(Trifluoromethyl)pyrimidin-2-yloxy)but-1-ynyl)oxazolidin-2-one (**3a**)

**Compound 3a** was either obtained from **2a** (400 mg, 1.3 mmol) following the general procedure B or according to Evano's conditions.<sup>4</sup>

**From procedure B:** After purification of the crude material by column chromatography (Petroleum ether/EtOAc: 6:4), **3a** was isolated as a white solid (136 mg, 45 % yield).

**From Evano's conditions:** In a 100 mL round bottom flask equipped with a magnetic stirrer were placed 2-(but-3-yn-1-yloxy)-4-trifluoromethylpyrimidine (1 eq., 1.6 g, 7.4 mmol) dissolved in a mixture of ethanol (21 mL) and a 32% hydroxyammonium solution (18 mL). The mixture was stirred for few minutes and then was added CuI (2 eq., 2.8 g, 14.8 mmol) and stirring was allowed to continue until complete consumption of starting material. The crude green mixture was filtrated over büchner and washed with an aqueous solution of  $NH_4OH$  (32%),  $H_2O$ , ethanol and finally  $Et_2O$ . In a 100 mL round bottom flask equipped with a magnetic stirrer was placed the alkynylcopper (1 eq., 1.6 g, 5.7 mmol) and 2-oxazolidinone (5 eq., 2.5 g, 28.7 mmol). MeCN (14.5 mL, 0.4 M) was added and the reaction mixture was allowed to stir under an oxygen atmosphere for few minutes. TMEDA (1 eq., 0.27 mL, 1.79 mmol) was finally added and the mixture was stirred overnight at room temperature under an atmosphere of oxygen. The deep blue crude mixture was concentrated in vacuo and quenched with water. The aqueous phase was extracted with EtOAc. The combined organic phases were dried over  $MgSO_4$ , filtered and concentrated in vacuo. The resulting crude product was purified by flash chromatography on silica gel (Petroleum ether/EtOAc: 7/3). **3a** was isolated as a white solid (1.47 g, 66 % over two steps).

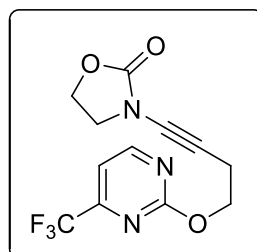

$C_{12}H_{10}F_3N_3O_3$   
301,22 g/mol

$^1H$  NMR ( $CDCl_3$ , 300 MHz, ppm)  $\delta$ : 8.78, (d,  $J$  = 4.9 Hz, 1H); 7.29 (d,  $J$  = 4.9 Hz, 1H); 4.55 (t,  $J$  = 7.9 Hz, 2H); 4.42 (t,  $J$  = 7.7 Hz, 2H); 3.89 (t,  $J$  = 7.9 Hz, 2H); 2.88 (t,  $J$  = 7.0 Hz, 2H);

$^{13}C$  NMR ( $CDCl_3$ , 100 MHz, ppm)  $\delta$ : 165.4; 162.4; 158.1 (q,  $J$  = 34.6 Hz, CH); 156.8; 120.3 (q,  $J$  = 273.4,  $CF_3$ ); 111.0; 72.0; 67.1; 66.5; 63.3; 47.1; 19.3

$^{19}F$  NMR ( $CDCl_3$ , 376 MHz, ppm)  $\delta$ : -70.2 ppm

Mp: 97 °C

HRMS-ESI  $m/z$  calcd for  $[M+H]^+$  302.0747, found 302.0747

<sup>4</sup> K. Jouvin, J. Heimbürger, G. Evano, *Chem. Sci.* **2012**, 756-760

*N*-Methyl-*N*-(4-(4-(trifluoromethyl)pyrimidin-2-yloxy)but-1-ynyl)methanesulfonamide (**3b**)

**Compound 3b** was obtained from **2b** (200 mg, 0.925 mmol) and *N*-methyl-*N*-mesylamine following the general procedure B. After purification of the crude material by column chromatography (Petroleum ether/EtOAc: 1:1), **3b** was isolated as a yellow oil (136 mg, 45 % yield).

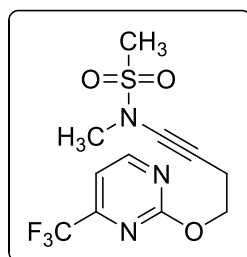

$C_{11}H_{12}F_3N_3O_3S$   
323,29 g/mol

$^1H$  NMR ( $CDCl_3$ , 300 MHz, ppm)  $\delta$ : 8.74 (d,  $J$  = 4.9 Hz, 1H); 7.26 (d,  $J$  = 4.9 Hz, 1H); 4.49 (t,  $J$  = 7.0 Hz, 2H); 3.11 (s, 3H); 3.01 (s, 3H); 2.81 (t,  $J$  = 7.0 Hz, 2H)

$^{13}C$  NMR ( $CDCl_3$ , 75 MHz, ppm)  $\delta$ : 165.3; 162.4; 157.7 (q,  $J$  = 36.4 Hz, CH); 120.6 (q, 275.9 Hz,  $CF_3$ ); 110.9 (d,  $J$  = 2.8 Hz, CH); 70.0; 66.5; 65.0; 39.2; 36.4; 19.1

$^{19}F$  NMR ( $CDCl_3$ , 376 MHz, ppm)  $\delta$ : -70.2 ppm

HRMS-ESI  $m/z$  calcd for  $[M+Na]^+$  346.0453, found 346.0344

2-(4-{[4-(Trifluoromethyl)pyrimidin-2-yl]oxy}but-1-yn-1-yl)-1,2-thiazolidine-1,1-dione (**3c**)

**Compound 3c** was obtained from **2c** (200 mg, 0.560 mmol) and 1,2-thiazolidine-1,1-dione following the general procedure B. After purification of the crude material by column chromatography (Petroleum ether/EtOAc: 1:1), **3c** was isolated as a yellow solid (240 mg, 77 % yield).

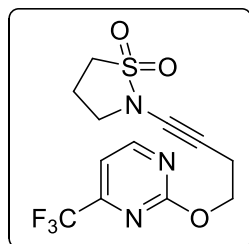

$C_{12}H_{12}F_3N_3O_3S$   
335,30 g/mol

$^1H$  NMR ( $CDCl_3$ , 300 MHz, ppm)  $\delta$ : 8.75 (d,  $J$  = 4.9 Hz, 1H); 7.28 (d,  $J$  = 4.9 Hz, 1H); 4.51 (t, 7.0 Hz, 2H); 3.65 (t,  $J$  = 7.0 Hz, 2H); 2.20 (t,  $J$  = 7.3 Hz, 2H); 2.84 (t,  $J$  = 7.0 Hz, 2H); 2.42 (m, 2H)

$^{13}C$  NMR ( $CDCl_3$ , 100 MHz, ppm)  $\delta$ : 164.9; 161.9; 157.5 (q,  $J$  = 35.9 Hz, CH); 119.2 (q,  $J$  = 275.6 Hz,  $CF_3$ ); 110.4 (2.5 Hz, CH); 71.2; 66.6; 61.2; 49.4; 45.8; 19.0; 18.9

$^{19}F$  NMR ( $CDCl_3$ , 376 MHz, ppm)  $\delta$ : -71.2

Mp: 124 °C

HRMS-ESI  $m/z$  calcd for  $[M+H]^+$  336.0624, found 336.0627

1-(4-(4-(Trifluoromethyl)pyrimidin-2-yloxy)but-1-ynyl)azetidin-2-one (**3d**)

**Compound 3d** was obtained from **2d** (377 mg, 1.32 mmol) and azetidinone following the general procedure B. After purification of the crude material by column chromatography (Petroleum ether/EtOAc: 6:4), **3d** was isolated as a white solid (301 mg, 60 % yield).

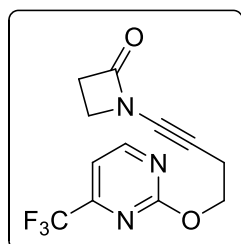

$C_{12}H_{10}F_3N_3O_2$   
285,22 g/mol

$^1H$  NMR ( $CDCl_3$ , 300 MHz, ppm)  $\delta$ : 8.72 (d,  $J$  = 5.0 Hz, 1H); 7.24 (d,  $J$  = 5.0 Hz, 1H); 4.46 (t, 7.1 Hz, 2H); 3.53 (d,  $J$  = 4.6 Hz, 2H); 2.95 (t,  $J$  = 3.0 Hz, 2H); 2.79 (t, 7.1 Hz, 2H)

$^{13}C$  NMR ( $CDCl_3$ , 75 MHz, ppm)  $\delta$ : 167.4; 165.2; 162.3; 157.8 (q,  $J$  = 36.4 Hz, CH); 122.0 (q, 275.9 Hz,  $CF_3$ ); 110.9 (d,  $J$  = 2.5 Hz, CH), 71.7; 63.34; 65.8; 43.0; 37.8; 19.1

$^{19}F$  NMR ( $CDCl_3$ , 376 MHz, ppm)  $\delta$ : -71.2

Mp: 87 °C

**HRMS-ESI**  $m/z$  calcd for  $[M+H]^+$  286.0798, found 286.0802

Methyl 1-(4-(4-(trifluoromethyl)pyrimidin-2-yloxy)but-1-ynyl)-1H-indole-3-carboxylate (**3e**)

**Compound 3e** was obtained from **2e** (500 mg, 2.31 mmol) and 1H-indole-3-carboxylate following the general procedure B. After purification of the crude material by column chromatography (Petroleum ether/EtOAc: 7:3), **3e** was isolated as a white solid (451 mg, 50 % yield).

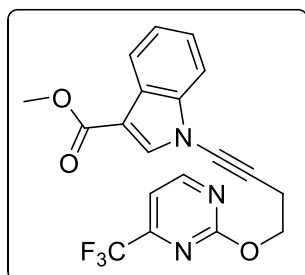

$C_{19}H_{14}F_3N_3O_3$   
389,33 g/mol

**$^1H$  NMR** ( $CDCl_3$ , 300 MHz, ppm)  $\delta$ : 8.18 (d,  $J$  = 5.0 Hz, 1H); 7.54 (m, 1H); 6.94 (m, 1H); 6.79-6.65 (4H); 4.07 (t,  $J$  = 6.8 Hz, 2H); 3.31 (s, 3H); 2.45 (t,  $J$  = 6.8 Hz, 2H)

**$^{13}C$  NMR** ( $CDCl_3$ , 75 MHz, ppm)  $\delta$ : 165.0; 164.2; 162.0; 157.6 (q,  $J$  = 35.9 Hz, CH); 138.0; 134.8; 125.0; 124.2; 123.4 (q, 273 Hz,  $CF_3$ ); 123.3; 121.6; 111.2; 110.9; 110.2; 71.9; 67.4; 65.9; 51.1; 18.9

**$^{19}F$  NMR** ( $CDCl_3$ , 376 MHz, ppm)  $\delta$ : -71.2 ppm

**Mp**: 121 °C

**HRMS-ESI**  $m/z$  calcd for  $[M+H]^+$  390.1060, found 390.1067

3-(4-(5-Fluoropyrimidin-2-yloxy)but-1-ynyl)oxazolidin-2-one (**3f**)

**Compound 3f** was obtained from **2f** (100 mg, 0.40 mmol) following the general procedure B. After purification of the crude material by column chromatography (Petroleum ether/EtOAc: 6:4), **3f** was isolated as a white solid (116 mg, 77 % yield).

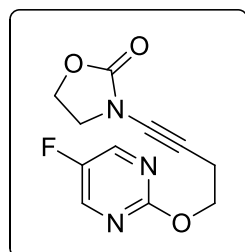

$C_{11}H_{10}FN_3O_3$   
251,21g/mol

**$^1H$  NMR** ( $CDCl_3$ , 300 MHz, ppm)  $\delta$ : 8.30 (s, 2H); 4.36 (t,  $J$  = 7.5 Hz, 4H); 3.83 (t,  $J$  = 7.9 Hz, 2H); 2.76 (t,  $J$  = 7.2 Hz, 2H)

**$^{13}C$  NMR** ( $CDCl_3$ , 75 MHz, ppm)  $\delta$ : 161.1; 156.5 (d,  $J$  = 35.9 Hz, CH); 152.8; 146.7 (d,  $J$  = 19.5 Hz, CH); 71.7; 67.0; 66.2; 63.2; 47.0; 19.1

**$^{19}F$  NMR** ( $CDCl_3$ , 376MHz, ppm)  $\delta$ : -150.8

**HRMS-ESI**  $m/z$  calcd for  $[M+Cl]^+$  286.1167, found 286.1160

1-(4-(5-Fluoropyrimidin-2-yloxy)but-1-ynyl)azetidin-2-one (**3g**)

**Compound 3g** was obtained from **2g** (107 mg, 0.45 mmol) and azetidinone following the general procedure B. After purification of the crude material by column chromatography (Petroleum ether/EtOAc: 6:4), **3g** was isolated as a white solid (40 mg, 57 % yield).

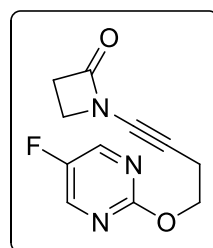

$C_{11}H_{10}FN_3O_2$   
235,21 g/mol

**$^1H$  NMR** ( $CDCl_3$ , 400 MHz, ppm)  $\delta$ : 8.36 (s, 2H); 4.41 (t,  $J$  = 7.0 Hz, 2H); 3.57 (t,  $J$  = 5.0 Hz, 2H); 2.99 (t,  $J$  = 5.0 Hz, 2H); 2.80 (t,  $J$  = 7.0 Hz, 2H)

**$^{13}C$  NMR** ( $CDCl_3$ , 100 MHz, ppm)  $\delta$ : 167.4, 161.3, 155.9; 153.4 (d,  $J$  = 19.8 Hz, CH); 71.6; 63.3; 66.1; 43.1; 37.0; 19.3

**$^{19}F$  NMR** ( $CDCl_3$ , 376 MHz, ppm)  $\delta$ : -150.7

**Mp**: 78 °C

**HRMS-ESI**  $m/z$  calcd for  $[M+H]^+$  236.0830, found 236.0860

Methyl 1-(4-(5-fluoropyrimidin-2-yloxy)but-1-ynyl)-1H-indole-3-carboxylate (**3h**)

**Compound 3h** was obtained from **2h** (790 mg, 2.33 mmol) and 1H-indole-3-carboxylate following the general procedure B. After purification of the crude material by column chromatography (Petroleum ether/EtOAc: 7:3), **3h** was isolated as a yellow solid (137 mg, 45 % yield).

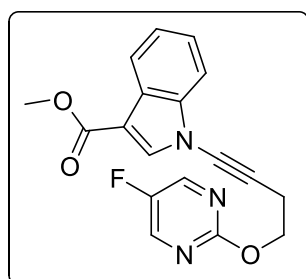

$C_{18}H_{14}FN_3O_3$   
339,32 g/mol

**$^1H$  NMR** ( $CDCl_3$ , 300 MHz, ppm)  $\delta$ : 8.42 (s, 2H); 8.16 (m, 1H); 7.89 (s, 1H); 7.57 (dd,  $J$  = 1.9 Hz, 6.6 Hz, 1H); 7.38-7.32 (m, 2H); 4.59 (t,  $J$  = 7.0 Hz, 2H); 3.93 (s, 3H), 3.04 (t,  $J$  = 7.0 Hz, 2H)

**$^{13}C$  NMR** ( $CDCl_3$ , 100 MHz, ppm)  $\delta$ : 164.80; 161.4; 156.1; 153.6; 147.1 (d,  $J$  = 22.0 Hz, CH); 138.8; 135.4; 125.5; 124.7; 123.9; 122.3; 111.8; 72.4; 68.1; 66.4; 51.7; 19.5

**$^{19}F$  NMR** ( $CDCl_3$ , 376 MHz, ppm)  $\delta$ : -150.5

**Mp**: 87 °C

**HRMS-ESI**  $m/z$  calcd for  $[M+H]^+$  340.1092, found 340.1099

3-(4-(5-Chloropyrimidin-2-yloxy)but-1-ynyl)oxazolidin-2-one (**3i**)

Compound **3i** was obtained according to Evano's conditions.<sup>4</sup> In a 100 mL round bottom flask equipped with a magnetic stirrer were placed 2-(but-3-yn-1-yloxy)-5-chloropyrimidine (1 eq., 500 mg, 2.74 mmol) dissolved in a mixture of ethanol (10 mL) and a 32% hydroxyammonium solution (17 mL). The mixture was stirred for few minutes and then was added CuI (2 eq., 1042 mg, 5.48 mmol) and stirring was allowed to continue until complete consumption of starting material. The crude green mixture was filtrated over büchner and washed with an aqueous solution of  $NH_4OH$  (32%),  $H_2O$ , ethanol and finally  $Et_2O$ .

In a 100 mL round bottom flask equipped with a magnetic stirrer was placed the alkynylcopper (1 eq., 438 mg, 1.79 mmol) and 2-oxazolidinone (5 eq., 777 mg, 8.92 mmol). MeCN (4.5 mL, 0.4 M) was added and the reaction mixture was allowed to stir under an oxygen atmosphere for few minutes. TMEDA (1 eq., 0.27 mL, 1.79 mmol) was finally added and the mixture was stirred overnight at room temperature under an atmosphere of oxygen. The deep blue crude mixture was concentrated in vacuo and quenched with water. The aqueous phase was extracted with EtOAc. The combined organic phases were dried over  $MgSO_4$ , filtered and concentrated in vacuo. The resulting crude product was purified by flash chromatography on silica gel (Petroleum ether/EtOAc: 7/3). **3i** is isolated as a white solid (402 mg, 55 % over two steps).

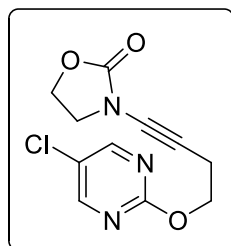

$C_{11}H_{10}ClN_3O_3$   
267,67 g/mol

**$^1H$  NMR** ( $CDCl_3$ , 300 MHz, ppm)  $\delta$ : 8.44 (s, 2H); 4.47-4.39 (4H); 3.87 (t,  $J$  = 8.4 Hz, 2H); 2.83 (t,  $J$  = 7.0 Hz, 2H)

**$^{13}C$  NMR** ( $CDCl_3$ , 100 MHz, ppm)  $\delta$ : 163.4; 157.89; 156.8; 124.6; 71.9; 67.2; 66.33; 63.2; 47.1; 19.3

**Mp**: 117 °C

**HRMS-ESI**  $m/z$  calcd for  $[M+H]^+$  268.0451, 268.0543



3-(4-(5-(Trifluoromethyl)pyrimidin-2-yloxy)but-1-ynyl)oxazolidin-2-one (3j)

**Compound 3j** was obtained from **2j** (190 mg, 0.88 mmol) following the general procedure B. After purification of the crude material by column chromatography (Petroleum ether/EtOAc: 7:3), **3j** was isolated as a white solid (92 mg, 35 % yield).

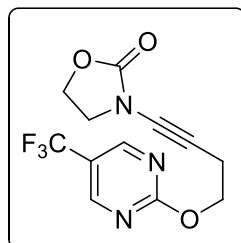

$C_{12}H_{10}F_3N_3O_3$   
301,22 g/mol

**Mp:** 97 °C

**$^1H$  NMR** ( $CDCl_3$ , 300 MHz, ppm)  $\delta$ : 8.73 (s, 2H); 4.52 (t,  $J$  = 7.2 Hz, 2H); 4.40 (t, 8.3 Hz, 2H); 3.86 (t,  $J$  = 8.3 Hz, 2H); 2.84 (t, 7.2 Hz, 2H)

**$^{13}C$  NMR** ( $CDCl_3$ , 100 MHz, ppm)  $\delta$ : 166.6; 157.4 (d  $J$  = 3.3 Hz, CH); 156.7; 128.7 (d,  $J$  = 184.4 Hz); 123.4 (q, 270.8 Hz,  $CF_3$ ); 119.5 (q, 34.4 Hz, , CH); 72.0; 66.84; 66.6; 63.3; 47.1; 19.1

**$^{19}F$  NMR** ( $CDCl_3$ , 376 MHz, ppm)  $\delta$ : -62.5

**HRMS-ESI**  $m/z$  calcd for  $[M+H]^+$  302.0747, found 302.0756

3-(4-(5-Fluoro-4-(thiophen-3-yl)pyrimidin-2-yloxy)but-1-ynyl)oxazolidin-2-one (3k)

**Compound 3k** was obtained from **2k** (200 mg, 0.81 mmol) following the general procedure B. After purification of the crude material by column chromatography (Petroleum ether/EtOAc: 7:3), **3k** was isolated as a white solid (170 mg, 63 % yield).

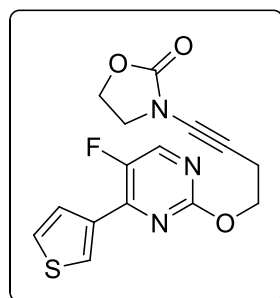

$C_{15}H_{12}FN_3O_3S$   
333,34 g/mol

**$^{19}F$  NMR** ( $CDCl_3$ , 376 MHz, ppm)  $\delta$ : -148.1

**Mp:** 74 °C

**$^1H$  NMR** ( $CDCl_3$ , 300 MHz, ppm)  $\delta$ : 8.37 (d,  $J$  = 3.0 Hz, 1H); 8.29 (ddd,  $J$  = 1.1 Hz, 2.6 Hz, 4.1 Hz, 1H); 7.87 (dt,  $J$  = 1.3 Hz, 5.3 Hz, 1H); 7.42 (dd,  $J$  = 3.0 Hz, 5.3 Hz, 1H); 4.51 (dd,  $J$  = 7.5 Hz, 9.2 Hz, 2H); 4.41 (dd,  $J$  = 7.7 Hz, 9.4 Hz, 2H); 3.89 (dd,  $J$  = 6.6 Hz, 8.3 Hz, 2H); 2.88 (t,  $J$  = 7.2 Hz, 2H)

**$^{13}C$  NMR** ( $CDCl_3$ , 100 MHz, ppm)  $\delta$ : 160.9, 156.8; 151.7 (d,  $J$  = 256.0 Hz, CH); 149.4 (d,  $J$  = 12.5 Hz, CH); 135.1 (d,  $J$  = 5.1 Hz, CH); 135.9; 132.4; 130.6 (d,  $J$  = 10.3 Hz, CH); 127.8 (d,  $J$  = 4.4 Hz); 126.4; 71.8; 67.4; 66.3; 47.2; 19.4

**HRMS-ESI**  $m/z$  calcd for  $[M+H]^+$  334.0656, found 334.0663

3-(4-(5-Fluoro-4-phenylpyrimidin-2-yloxy)but-1-ynyl)oxazolidin-2-one (3l)

**Compound 3l** was obtained from **2l** (214 mg, 0.88 mmol) following the general procedure B. After purification of the crude material by column chromatography (Petroleum ether/EtOAc: 7:3), **3l** was isolated as a white solid (195 mg, 67 % yield).

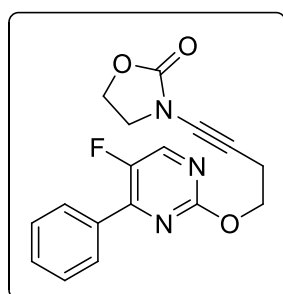

$C_{17}H_{14}FN_3O_3$   
327,31 g/mol

**$^1H$  NMR** ( $CDCl_3$ , 300 MHz, ppm)  $\delta$ : 8.42 (d,  $J$  = 3.0 Hz, 1H); 8.16-8.13 (m, 2H); 7.54-7.50 (m, 3H); 4.55 (t,  $J$  = 7.2 Hz, 2H); 4.42 (t,  $J$  = 7.9 Hz, 2H); 3.90 (t,  $J$  = 7.9 Hz, 2H); 2.90 (t,  $J$  = 7.2 Hz, 2H)

**$^{13}C$  NMR** ( $CDCl_3$ , 100 MHz, ppm)  $\delta$ : 160.9; 156.8; 153.1; (d,  $J$  = 256.0 Hz); 153.6 (d,  $J$  = 9.5 Hz, CH); 148.5 (d,  $J$  = 27.9 Hz, CH); 133.2 (d,  $J$  = 5.1 Hz, CH); 131.7; 129.5; 129.1; 71.8; 67.5; 66.41; 63.2; 47.2; 19.5

**<sup>19</sup>F NMR** (CDCl<sub>3</sub>, 376 MHz, ppm) δ: -148.7

**Mp:** 135 °C

**HRMS-ESI** *m/z* calcd for [M+H]<sup>+</sup> 328.1098, found 328.1092

3-(4-(5-Fluoro-4-(4-fluorophenyl)pyrimidin-2-yloxy)but-1-ynyl)oxazolidin-2-one (**3m**)

**Compound 3m** was obtained from **2m** (200 mg, 0.77 mmol) following the general procedure B. After purification of the crude material by column chromatography (Petroleum ether/EtOAc: 7:3), **3m** was isolated as a white solid (210 mg, 79 % yield).

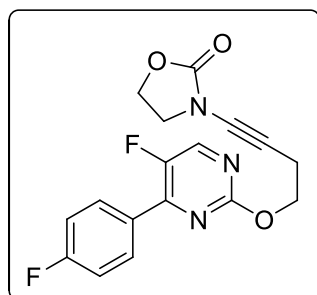

C<sub>17</sub>H<sub>13</sub>F<sub>2</sub>N<sub>3</sub>O<sub>3</sub>  
345,30 g/mol

**<sup>1</sup>H NMR** (CDCl<sub>3</sub>, 300 MHz, ppm) δ: 8.43 (d, *J* = 3.4 Hz, 1H); 8.2 (dd, *J* = 2.8 Hz, 5.7 Hz, 2H); 7.22 (dd ap t, *J* = 8.9 Hz, 2H); 4.55 (t, *J* = 7.2 Hz, 2H); 4.44 (t, *J* = 7.7 Hz, 2H); 3.91 (t, *J* = 8.3 Hz, 2H); 2.91 (t, *J* = 7.2 Hz, 2H)

**<sup>13</sup>C NMR** (CDCl<sub>3</sub>, 100 MHz, ppm) δ: 165.3; 165.9; 162.4; 154.8; 142.0 (d, *J* = 9.6 Hz); 132.3; 131.0 (t, *J* = 8.8 Hz); 116.6; 115.7 (d, *J* = 23.5 Hz); 70.5; 63.6; 46.6 (d, *J* = 6.6 Hz); 30.0; 28.7

**<sup>19</sup>F NMR** (CDCl<sub>3</sub>, 376 MHz, ppm) δ: -108.91; -148.80

**Mp:** 120 °C

**HRMS-ESI** *m/z* calcd for [M+H]<sup>+</sup> 346.1004, found 346.0998

3-(5-(4-(Trifluoromethyl)pyrimidin-2-yloxy)pent-1-ynyl)oxazolidin-2-one (**3n**)

**Compound 3n** was obtained from **2n** (180 mg, 0.78 mmol) following the general procedure B. After purification of the crude material by column chromatography (Petroleum ether/EtOAc: 6:4), **3n** was isolated as a white solid (185 mg, 75 % yield).

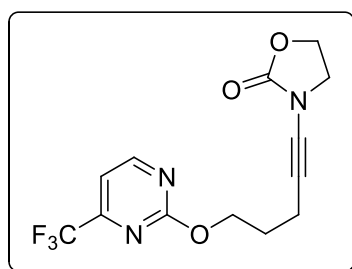

C<sub>13</sub>H<sub>12</sub>F<sub>3</sub>N<sub>3</sub>O<sub>3</sub>  
315,25 g/mol

**<sup>1</sup>H NMR** (CDCl<sub>3</sub>, 300 MHz, ppm) δ: 8.7 (d, *J* = 5.3 Hz, 1H); 7.2 (d, *J* = 5.3 Hz, 1H); 4.45 (t, *J* = 6.2 Hz, 2H); 4.34 (t, *J* = 9.0 Hz, 2H); 3.81 (t, *J* = 6.8 Hz, 2H); 2.46 (t, *J* = 6.6 Hz, 2H); 2.01-1.95 (2H)

**<sup>13</sup>C NMR** (CDCl<sub>3</sub>, 100 MHz, ppm) δ: 165.5; 162.2; 157.6 (q, *J* = 37.9 Hz, CH); 156.7; 120.3 (q, *J* = 275.5 Hz, CF<sub>3</sub>); 110.6 (d, *J* = 3.3 Hz, CH); 71.0; 69.8; 67.1; 63.1; 47.1; 28.0; 15.3

**<sup>19</sup>F NMR** (CDCl<sub>3</sub>, 376 MHz, ppm) δ: -71.3

**Mp:** 130 °C

**HRMS-ESI** *m/z* calcd for [M+H]<sup>+</sup> 316.0904, found 316.0895

3-(6-(4-(Trifluoromethyl)pyrimidin-2-yloxy)hex-1-ynyl)oxazolidin-2-one (**3o**)

**Compound 3o** was obtained from **2o** (180 mg, 0.74 mmol) following the general procedure B. After purification of the crude material by column chromatography (Petroleum ether/EtOAc: 6:4), **3o** was isolated as a white solid (920 mg, 79 % yield).

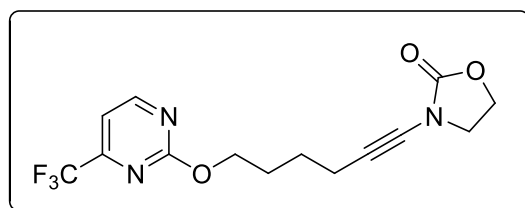

$C_{14}H_{14}F_3N_3O_3$   
329,27 g/mol

$^1H$  NMR ( $CDCl_3$ , 300 MHz, ppm)  $\delta$ : 8.75 (d,  $J$  = 4.8 Hz, 1H), 7.25 (d,  $J$  = 4.8 Hz, 1H), 4.46 (t,  $J$  = 6.2 Hz, 2H), 4.42 (t,  $J$  = 7.1 Hz, 2H), 3.87 (t,  $J$  = 8.3 Hz, 2H), 2.41 (t,  $J$  = 6.9 Hz, 2H), 2.01-1.92 (2H), 1.79-1.69 (2H)

$^{13}C$  NMR ( $CDCl_3$ , 100 MHz, ppm)  $\delta$ : 165.5; 162.2; 157.5 (q,  $J$  = 36.8 Hz, CH); 156.7; 120.2 (q,  $J$  = 275.5 Hz,  $CF_3$ ); 110.4 (d,  $J$  = 3.2 Hz, CH); 70.8; 70.3; 68.0; 63.1; 47.1; 27.8; 25.2; 16.11

$^{19}F$  NMR ( $CDCl_3$ , 376 MHz, ppm)  $\delta$ : -71.3

**Mp**: 142 °C

**HRMS-ESI**  $m/z$  calcd for  $[M+H]^+$  330.0605, found 330.0616

3-((2-(4-(Trifluoromethyl)pyrimidin-2-yloxy)cyclohexyl)ethynyl)oxazolidin-2-one (**3p**)

**Compound 3p** was obtained from **2p** (200 mg, 0.74 mmol) following the general procedure B. After purification of the crude material by column chromatography (Petroleum ether/EtOAc: 7:3), **3p** was isolated as a white solid (139 mg, 53 % yield).

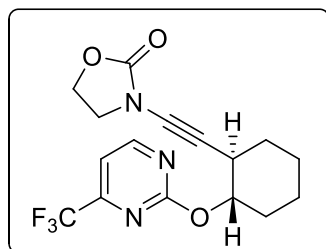

$C_{16}H_{16}F_3N_3O_3$   
355,31g/mol

$^1H$  NMR ( $CDCl_3$ , 300 MHz, ppm)  $\delta$ : 8.74 (d,  $J$  = 4.5 Hz, 1H), 7.23 (d,  $J$  = 4.5 Hz, 1H), 5.15 (td,  $J$  = 8.5 Hz, 3.8 Hz, 1H), 4.33 (t,  $J$  = 8.1 Hz, 2H), 3.74 (td,  $J$  = 8.3 Hz, 1.8 Hz, 2H), 2.86 (td,  $J$  = 4.3 Hz, 8.5 Hz, 1H), 2.17-2.03 (m, 2H), 1.75-1.69 (m, 2H), 1.60-1.49 (m, 2H), 1.43-1.29 (m, 2H)

$^{13}C$  NMR ( $CDCl_3$ , 100 MHz, ppm)  $\delta$ : 170.9, 155.1, 146.0 (q,  $J$  = 35.8 Hz, CH), 142.7; 122.8, 121.5 (q,  $J$  = 275.2 Hz,  $CF_3$ ), 107.8 (d,  $J$  = 2.9 Hz, CH), 90.00, 63.0; 49.08, 46.2, 30.7, 30.05, 28.1, 25.9, 24.6

$^{19}F$  NMR ( $CDCl_3$ , 376 MHz, ppm)  $\delta$ : -69.8

**Mp**: 133 °C

**HRMS-ESI**  $m/z$  calcd for  $[M+H]^+$  356.1217, found 356.1225

1-((2-(4-(Trifluoromethyl)pyrimidin-2-yloxy)cyclohexyl)ethynyl)azetidin-2-one (**3q**)

**Compound 3q** was obtained from **2q** (100 mg, 0.37 mmol) following the general procedure B. After purification of the crude material by column chromatography (Petroleum ether/EtOAc: 7:3), **3q** was isolated as a yellow solid (80 mg, 64 % yield).

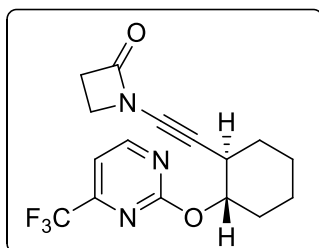

$C_{16}H_{16}F_3N_3O_2$   
339,31 g/mol

$^1H$  NMR ( $CDCl_3$ , 300 MHz, ppm)  $\delta$ : 8.76 (d,  $J$  = 4.9 Hz, 1H), 7.23 (d,  $J$  = 4.9 Hz, 1H), 5.16 (td,  $J$  = 8.31 Hz, 3.8 Hz, 1H), 3.48 (td,  $J$  = 1.0 Hz, 5.0 Hz, 2H), 2.94 (t,  $J$  = 4.8 Hz, 2H), 2.88 (m, 1H), 2.19-2.04 (2H), 1.86-1.68 (2H), 1.65-1.52 (2H), 1.48-1.34 (2H)

$^{13}C$  NMR ( $CDCl_3$ , 100 MHz, ppm)  $\delta$ : 166.8; 165.1; 161.9; 157.7; (q,  $J$  = 35.2 Hz, CH); 120.1 (q, 273.6 Hz,  $CF_3$ ); 110.2; 77.8; 71.8; 70.4; 42.8; 37.5; 34.0; 30.1; 29.4; 23.7; 22.9

**<sup>19</sup>F NMR** (CDCl<sub>3</sub>, 376 MHz, ppm)  $\delta$ : -71.2 ppm

**Mp**: 124 °C

**HRMS-ESI**  $m/z$  calcd for [M+H]<sup>+</sup> 340.1275, found 340.1267

3-(3-(1-(4-(Trifluoromethyl)pyrimidin-2-yloxy)cyclobutyl)prop-1-ynyl)oxazolidin-2-one (3r)

**Compound 3r** was obtained from **2r** (200 mg, 0.78 mmol) following the general procedure B. After purification of the crude material by column chromatography (Petroleum ether/EtOAc: 7:3), **3r** was isolated as a yellow solid (190 mg, 71 % yield).

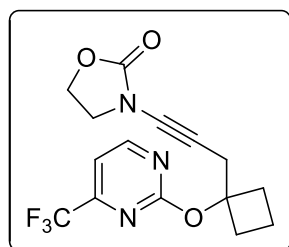

C<sub>15</sub>H<sub>14</sub>F<sub>3</sub>N<sub>3</sub>O<sub>3</sub>  
341,29 g/mol

**<sup>1</sup>H NMR** (CDCl<sub>3</sub>, 300 MHz, ppm)  $\delta$ : 8.72 (d,  $J$  = 4.9 Hz, 1H), 7.24 (d,  $J$  = 4.9 Hz, 1H), 4.39 (t,  $J$  = 8.2 Hz, 2H), 3.85 (t,  $J$  = 8.2 Hz, 2H), 3.18 (s, 2H), 2.48 (t,  $J$  = 8.9 Hz, 4H), 1.95-1.67 (m, 2H)

**<sup>13</sup>C NMR** (CDCl<sub>3</sub>, 100 MHz, ppm)  $\delta$ : 164.1; 162.2; 157.6 (q,  $J$  = 36.0 Hz, CH); 156.8; 120.3 (q,  $J$  = 275.8 Hz, CF<sub>3</sub>); 110.6; 82.4; 71.6; 70.0; 64.0; 47.1; 33.7; 25.7; 13.6

**<sup>19</sup>F NMR** (CDCl<sub>3</sub>, 376 MHz, ppm)  $\delta$ : -71.4 ppm

**Mp**: 125 °C

**HRMS-ESI**  $m/z$  calcd for [M+H]<sup>+</sup> 342.1060, found 342.1071

3-(3-(1-(4-(Trifluoromethyl)pyrimidin-2-yloxy)cyclohexyl)prop-1-ynyl)oxazolidin-2-one (3s)

**Compound 3s** was obtained from **2s** (200 mg, 0.70 mmol) following the general procedure B. After purification of the crude material by column chromatography (Petroleum ether/EtOAc: 7:3), **3s** was isolated as a yellow solid (87 mg, 44 % yield).

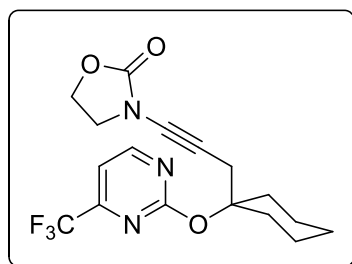

C<sub>17</sub>H<sub>18</sub>F<sub>3</sub>N<sub>3</sub>O<sub>3</sub>  
369,34 g/mol

**<sup>1</sup>H NMR** (CDCl<sub>3</sub>, 300 MHz, ppm)  $\delta$ : 8.71 (d,  $J$  = 4.9 Hz, 1H); 7.22 (d,  $J$  = 4.7 Hz, 1H); 4.36 (t,  $J$  = 8.0 Hz, 2H); 3.78 (t,  $J$  = 8.0 Hz, 2H); 3.19 (s, 2H); 2.50-2.45 (m, 2H); 1.73-1.27 (m, 8H)

**<sup>13</sup>C NMR** (CDCl<sub>3</sub>, 100 MHz, ppm)  $\delta$ : 164.9; 162.0; 156.7; 157.4 (q,  $J$  = 36.7 Hz, CH); 120.4 (q,  $J$  = 275.0 Hz, CF<sub>3</sub>); 110.4 (d,  $J$  = 3.3 Hz, CH); 84.4; 82.6; 72.56; 67.00; 63.1; 47.1; 34.4; 27.9; 25.5; 22.0

**<sup>19</sup>F NMR** (CDCl<sub>3</sub>, 376 MHz, ppm)  $\delta$ : -71.3

**Mp**: 119 °C

**HRMS-ESI**  $m/z$  calcd for [M+H]<sup>+</sup> 370.1373, found 370.1376

N-Methyl-N-(3-(1-(4-(trifluoromethyl)pyrimidin-2-yloxy)cyclobutyl)prop-1-ynyl)methanesulfonamide (3t)

**Compound 3t** was obtained from **2t** (209 mg, 0.78 mmol) and *N*-methyl-*N*-mesylamine following the general procedure B. After purification of the crude material by column chromatography (Petroleum ether/EtOAc: 7:3), **3t** was isolated as a yellow solid (90 mg, 32 % yield).

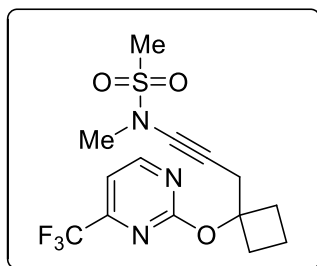

$C_{14}H_{16}F_3N_3O_3S$   
363,36 g/mol

$^1H$  NMR ( $CDCl_3$ , 300 MHz, ppm)  $\delta$ : 8.71 (d,  $J$  = 4.9 Hz, 1H), 7.23 (d,  $J$  = 4.9 Hz, 1H), 3.16 (s, 3H); 3.12 (s, 3H), 3.01 (s, 3H), 2.48-2.43 (m, 4H), 1.89 (m, 1H), 1.74 (m, 1H)

$^{13}C$  NMR ( $CDCl_3$ , 100 MHz, ppm)  $\delta$ : 164.5; 162.2; 157.8 (q,  $J$  = 36.7 Hz, CH); 120.4 (q,  $J$  = 275.1 Hz,  $CF_3$ ); 110.6 (d,  $J$  = 2.9 Hz, CH), 82.6; 75.9; 65.3; 39.3; 36.5; 33.8; 25.8; 13.7

$^{19}F$  NMR ( $CDCl_3$ , 376 MHz, ppm)  $\delta$ : -71.4 ppm

**Mp:** 111 °C

**HRMS-ESI**  $m/z$  calcd for  $[M+H]^+$  364.0937, found 364.0947

Methyl-1-(3-(1-(4-(trifluoromethyl)pyrimidin-2-yloxy)cyclobutyl)prop-1-ynyl)-1H-indole-3-carboxylate (**3u**)

**Compound 3u** was obtained from **2u** (200 mg, 0.78 mmol) and 1H-indole-3-carboxylate following the general procedure B. After purification of the crude material by column chromatography (Petroleum ether/EtOAc: 7:3), **3u** was isolated as a yellow solid (152 mg, 44 % yield).

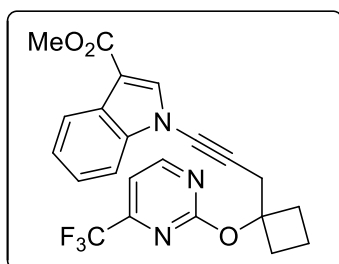

$C_{22}H_{18}F_3N_3O_3$   
429,39 g/mol

$^1H$  NMR ( $CDCl_3$ , 300 MHz, ppm)  $\delta$ : 8.77 (d,  $J$  = 4.8 Hz, 1H); 8.15 (dd,  $J$  = 1.3 Hz, 6.8 Hz, 1H); 7.88 (s, 1H); 7.54 (dd,  $J$  = 1.3 Hz, 7.1 Hz, 1H); 7.34 (dq, 1.3 Hz, 8.8 Hz, 2 H); 7.28 (d,  $J$  = 4.8 Hz, 1H); 3.92 (s, 3H); 3.38 (s, 2H); 2.61 (d,  $J$  = 6.6 Hz, 2H); 2.58 (d,  $J$  = 6.6 Hz, 2H); 2.04-1.79 (2H)

$^{13}C$  NMR ( $CDCl_3$ , 100 MHz, ppm)  $\delta$ : 164.7; 164.3; 162.3; 157.5 (q,  $J$  = 37.4 Hz, CH); 138.8; 135.3; 152.5; 124.7; 123.7; 122.1; 120.7 (q  $J$  = 275 Hz,  $CF_3$ ); 111.8; 110.7; 110.5; 82.4; 72.0; 67.8; 51.6; 33.9; 25.9; 13.8;

$^{19}F$  NMR ( $CDCl_3$ , 376 MHz, ppm)  $\delta$ : -71.3 ppm

**Mp:** 87 °C

**HRMS-ESI**  $m/z$  calcd for  $[M+H]^+$  430.1373, found 430.1381

3-(4-(4-(Trifluoromethyl)pyrimidin-2-ylthio)but-1-ynyl)oxazolidin-2-one (**3v**)

**Compound 3v** was obtained from **2v** (400 mg, 1.72 mmol) following the general procedure B using 10 eq. (1.5 g, 17.22 mmol) of oxazolidinone and adding **2v** over 12 hours. After purification of the crude material by column chromatography (Petroleum ether/EtOAc: 1:1), **3v** was isolated as a white solid (378 mg, 69 % yield).

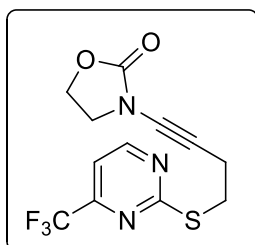

$C_{12}H_{10}F_3N_3O_2S$   
317,29 g/mol

$^1H$  NMR ( $CDCl_3$ , 300 MHz, ppm)  $\delta$ : 8.76 (d,  $J$  = 5.0 Hz, 1H); 7.29 (d,  $J$  = 5.0 Hz, 1 H); 4.43 (t,  $J$  = 6.6 Hz, 2H); 3.9 (t,  $J$  = 6.6 Hz, 2H); 3.35 (t,  $J$  = 7.0 Hz, 2H); 2.82 (t, 6.8 Hz, 2H)

$^{13}C$  NMR ( $CDCl_3$ , 100 MHz, ppm)  $\delta$ : 173.6; 159.9; 156.1 (q,  $J$  = 36.2 Hz); 154.6; 123.9; 120.4 (q,  $J$  = 273.3 Hz); 112.4 (d,  $J$  = 3.8 Hz); 112.3; 63.1; 44.4; 35.2; 28.2

$^{19}F$  NMR ( $CDCl_3$ , 376 MHz, ppm)  $\delta$ : -70.33

N-(4-(2-Oxooxazolidin-3-yl)but-3-ynyl)-N-(4-(trifluoromethyl)pyrimidin-2-yl)acetamide (**3w**)

**Compound 3w** was obtained from **2w** (150 mg, 0.58 mmol) following the general procedure B. After purification of the crude material by column chromatography (Petroleum ether/EtOAc: 6:4), **3w** was isolated as a white solid (47 mg, 25 % yield).

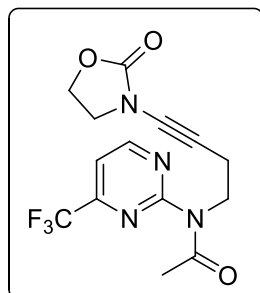

$C_{14}H_{13}F_3N_4O_3$   
342,27 g/mol

**$^1H$  NMR** ( $CDCl_3$ , 300 MHz, ppm)  $\delta$ : 8.86 (d,  $J$  = 4.9 Hz, 1H); 7.33 (d,  $J$  = 4.9 Hz, 1H); 4.36 (t,  $J$  = 8.1 Hz); 4.29 (t,  $J$  = 7.4 Hz, 2H); 3.78 (t,  $J$  = 8.1 Hz); 2.68 (t,  $J$  = 7.4 Hz, t), 2.50 (s, 3H)

**$^{13}C$  NMR** ( $CDCl_3$ , 100 MHz, ppm)  $\delta$ : 172.6; 161.2; 160.9; 156.6; 156.3 (q,  $J$  = 39.5 Hz); 120.4 (q,  $J$  = 273.9 Hz); 118.8 (d,  $J$  = 3.8 Hz); 71.8; 68.36; 47.1; 44.9; 26.7; 18.4

**$^{19}F$  NMR** ( $CDCl_3$ , 376 MHz, ppm)  $\delta$ : -71.3

**HRMS-ESI**  $m/z$  calcd for  $[M+Na]^+$  365.0832, found 365.0831

N-(4-(2-Oxazetidin-1-yl)but-3-ynyl)-N-(4-(trifluoromethyl)pyrimidin-2-yl)acetamide (**3x**)

**Compound 3x** was obtained from **2w** (200 mg, 0.78 mmol) following the general procedure B. After purification of the crude material by column chromatography (Petroleum ether/EtOAc: 6:4), **3x** was isolated as a white solid (145 mg, 54 % yield).

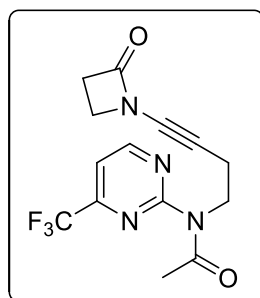

$C_{14}H_{13}F_3N_4O_2$   
326,27g/mol

**$^1H$  NMR** ( $CDCl_3$ , 300 MHz, ppm)  $\delta$ : 8.7 (d,  $J$  = 4.9 Hz, 1H); 7.33 (d,  $J$  = 4.9 Hz, 1H); 4.29 (t,  $J$  = 7.3 Hz, 2H); 3.48 (t,  $J$  = 4.7 Hz, 2H); 2.94 (t,  $J$  = 4.7 Hz, 2H); 2.67 (t,  $J$  = 7.3 Hz, 2H); 2.5 (s, 3H)

**$^{13}C$  NMR** ( $CDCl_3$ , 100 MHz, ppm)  $\delta$ : 172.6; 167.2; 161.3; 160.8; 156.3 (q,  $J$  = 35.1 Hz); 120.4 (q,  $J$  = 274.4 Hz); 111.8 (d,  $J$  = 3.3 Hz); 71.7; 67.3; 45.0; 43.0; 37.8; 26.7; 18.4

**$^{19}F$  NMR** ( $CDCl_3$ , 376 MHz, ppm)  $\delta$ : -71.3

**HRMS-ESI**  $m/z$  calcd for  $[M+Na]^+$  349.0883, found 349.0890

3-(6-(Trifluoromethyl)-2,3-dihydrofuro[2,3-b]pyridin-4-yl)oxazolidin-2-one (**4a**)

**Compound 4a** was obtained from **3a** (30 mg, 0.1 mmol) following the general procedure C. After purification of the crude material by column chromatography (Petroleum ether/EtOAc: 3:7), **4a** was isolated as a white solid (16 mg, 60 % yield).

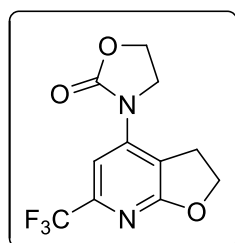

$C_{11}H_9F_3N_2O_3$   
274,20 g/mol

**$^1H$  NMR** ( $CDCl_3$ , 300 MHz, ppm)  $\delta$ : 7.19 (s, 1H); 4.68 (t,  $J$  = 8.7 Hz, 2H); 4.56 (t,  $J$  = 7.2 Hz, 9.6 Hz, 2H); 4.17 (t,  $J$  = 7.2 Hz, 2H); 3.43 (t,  $J$  = 8.7 Hz, 2 H)

**$^{13}C$  NMR** ( $CDCl_3$ , 100 MHz, ppm)  $\delta$ : 171.0; 154.2; 146.83 (q,  $J$  = 35.2 Hz, CH); 143.7; 124.22 (q,  $J$  = 274.4 Hz,  $CF_3$ ); 115.3; 106.1 (d,  $J$  = 5.1 Hz, CH); 70.0; 62.7; 46.1; 29.2

**$^{19}F$  NMR** ( $CDCl_3$ , 376 MHz, ppm)  $\delta$ : - 69.1

**Mp** : 127 °C

**HRMS-ESI**  $m/z$  calcd for  $[M+H]^+$  275.0638, found 275.0644

*N*-Methyl-*N*-(6-(Trifluoromethyl)-2,3-dihydrofuro[2,3-*b*]pyridin-4-yl)methanesulfonamide (**4b**)

**Compound 4b** was obtained from **3b** (36 mg, 0.1 mmol) following the general procedure C. After purification of the crude material by column chromatography (Petroleum ether/EtOAc: 3:7), **4b** was isolated as a yellow oil (7 mg, 21 % yield).

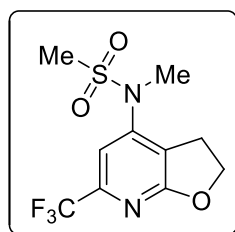

$C_{10}H_{11}F_3N_2O_3S$   
296,27 g/mol

$^1H$  NMR ( $CDCl_3$ , 300 MHz, ppm)  $\delta$ : 7.08 (s, 1H); 4.73 (t,  $J$  = 8.7 Hz, 2H); 3.50 (t,  $J$  = 8.7 Hz, 2H); 3.31 (s, 3H); 2.99 (s, 3H)

$^{13}C$  NMR ( $CDCl_3$ , 100 MHz, ppm)  $\delta$ : 171.1; 147.5; 147.4 (q,  $J$  = 24.2 Hz, CH); 123.7; 121.4 (q,  $J$  = 274.4 Hz,  $CF_3$ ); 110.4 (d,  $J$  = 2.9 Hz, CH); 70.4; 37.9; 36.9; 28.3

$^{19}F$  NMR ( $CDCl_3$ , 376 MHz, ppm)  $\delta$ : - 67.9

HRMS-ESI  $m/z$  calcd for  $[M+H]^+$  297.0515, found 297.0506

2-(4-{[4-(Trifluoromethyl)pyrimidin-2-yl]oxy}but-1-yn-1-yl)-2-thiazolidine-1,1-dione (**4c**)

**Compound 4c** was obtained from **3c** (34 mg, 0.1 mmol) following the general procedure C. After purification of the crude material by column chromatography (Petroleum ether/EtOAc: 2:8), **4c** was isolated as a yellow solid (16 mg, 52 % yield).

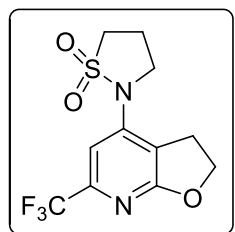

$C_{11}H_{11}F_3N_2O_3S$   
308,28 g/mol

$^1H$  NMR ( $CDCl_3$ , 300 MHz, ppm)  $\delta$ : 6.87 (s, 1H); 4.68 (t,  $J$  = 8.5 Hz, 2H); 3.93 (t,  $J$  = 7.2 Hz, 2H); 3.57 (t,  $J$  = 8.5 Hz, 2H); 3.41 (t,  $J$  = 7.2 Hz, 2H); 2.64 (q,  $J$  = 7.2 Hz, 2H)

$^{13}C$  NMR ( $CDCl_3$ , 100 MHz, ppm)  $\delta$ : 170.5; 146.7 (q,  $J$  = 34.5 Hz, CH); 143.9; 121.3 (q,  $J$  = 272.9 Hz,  $CF_3$ ); 112.4; 103.6 (d,  $J$  = 3.7 Hz, CH); 69.6; 48.6; 47.6; 29.4; 19.3

$^{19}F$  NMR ( $CDCl_3$ , 376 MHz, ppm)  $\delta$ : - 69.1

Mp : 132 °C

HRMS-ESI  $m/z$  calcd for  $[M+H]^+$  309.0515, found 309.0516

1-(6-(Trifluoromethyl)-2,3-dihydrofuro[2,3-*b*]pyridin-4-yl)azetidin-2-one (**4d**)

**Compound 4d** was obtained from **3d** (31 mg, 0.1 mmol) following the general procedure C. After purification of the crude material by column chromatography (Petroleum ether/EtOAc: 3:7), **4d** was isolated as a white powder (18 mg, 65 % yield).

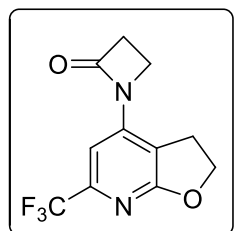

$C_{11}H_9F_3N_2O_2$   
258,20 g/mol

$^1H$  NMR ( $CDCl_3$ , 300 MHz, ppm)  $\delta$ : 7.28 (s, 1H); 4.68 (t,  $J$  = 8.7 Hz, 2H); 3.83 (t,  $J$  = 4.9 Hz, 2H); 3.54 (t,  $J$  = 8.7 Hz, 2H); 3.21 (t,  $J$  = 4.9 Hz, 2H)

$^{13}C$  NMR ( $CDCl_3$ , 100 MHz, ppm)  $\delta$ : 170.8; 164.9; 147.2 (q,  $J$  = 31.5 Hz, CH); 143.1; 121.6 (q,  $J$  = 274.4 Hz); 108.8; 103.7 (d,  $J$  = 4.4 Hz, CH); 69.9; 39.7; 37.3; 28.6

$^{19}F$  NMR ( $CDCl_3$ , 376 MHz, ppm)  $\delta$ : -69.2

Mp : 91 °C

HRMS-ESI  $m/z$  calcd for  $[M+H]^+$  259.0689, found 259.0679

Methyl 1-(6-(trifluoromethyl)-2,3-dihydrofuro[2,3-b]pyridin-4-yl)-1H-indole-3-carboxylate (**4e**)

**Compound 4e** was obtained from **3e** (39 mg, 0.1 mmol) following the general procedure C. After purification of the crude material by column chromatography (Petroleum ether/EtOAc: 3:7), **4e** was isolated as a yellow solid (18 mg, 49 % yield).

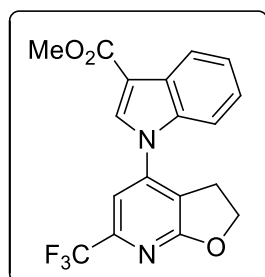

$C_{18}H_{13}F_3N_2O_3$   
362,30 g/mol

$^1H$  NMR ( $CDCl_3$ , 300 MHz, ppm)  $\delta$ : 8.30 (m, 1H); 7.97 (s, 1H); 7.43-7.36 (4 H); 4.82 (t,  $J$  = 8.5 Hz, 2H); 3.97 (s, 3H); 3.37 (t,  $J$  = 8.5 Hz, 2H)

$^{13}C$  NMR ( $CDCl_3$ , 100 MHz, ppm)  $\delta$ : 171.5; 165.0; 148.0 (q,  $J$  = 35.9 Hz, CH); 144.2; 136.0; 132.4; 127.2; 124.9; 123.4 (d,  $J$  = 102.0 Hz, CH); 121.3 (q, 273.6 Hz,  $CF_3$ ); 118.4; 111.9; 111.3; 110.8 (q,  $J$  = 2.2 Hz, CH); 70.4; 51.8; 30.0; 27.9

$^{19}F$  NMR ( $CDCl_3$ , 376 MHz, ppm)  $\delta$ : - 69.0

**Mp**: 158 °C

**HRMS-APCI**  $m/z$  calcd for  $[M+H]^+$  363.0951, found 363.0944

3-(5-Fluoro-2,3-dihydrofuro[2,3-b]pyridin-4-yl)oxazolidin-2-one (**4f**)

**Compound 4f** was obtained from **3f** (13 mg, 0.05 mmol) following the general procedure C. After purification of the crude material by column chromatography (Petroleum ether/EtOAc: 3:7), **4f** was isolated as a white powder (8 mg, 71 % yield). Due to limited amount of this cycloadduct, only partial  $^{13}C$  NMR data have been obtained.

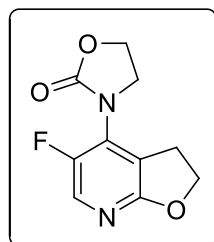

$C_{10}H_9FN_2O_3$   
224,19 g/mol

$^1H$  NMR ( $CDCl_3$ , 300 MHz, ppm)  $\delta$ : 7.90 (bs, 1H); 4.70 (t,  $J$  = 8.5 Hz, 2H); 4.58 (t,  $J$  = 7.6 Hz, 2H); 4.15 (t,  $J$  = 7.6 Hz, 2H); 3.35 (t,  $J$  = 8.5 Hz, 2H)

$^{13}C$  NMR ( $CDCl_3$ , 100 MHz, ppm (partial data))  $\delta$ : 165.8; 154.3; 131.1 (d,  $J$  = 12.5 Hz, CH); 70.2; 63.3; 46.1 (d,  $J$  = 7.4 Hz, CH); 28.5

$^{19}F$  NMR ( $CDCl_3$ , 376 MHz, ppm)  $\delta$ : - 149.1 ppm

**Mp**: 97 °C

**HRMS-ESI**  $m/z$  calcd for  $[M+H]^+$  225.0670, found 225.0659

1-(5-Fluoro-2,3-dihydrofuro[2,3-b]pyridin-4-yl)azetidin-2-one (**4g**)

**Compound 4g** was obtained from **3g** (12 mg, 0.05 mmol) following the general procedure C. After purification of the crude material by column chromatography (Petroleum ether/EtOAc: 3:7), **4g** was isolated as a yellow solid (9 mg, 90 % yield). Due to limited amount of this cycloadduct, only partial  $^{13}C$  NMR data have been obtained.

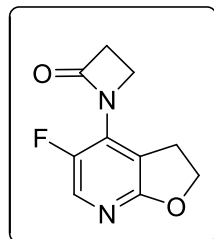

$C_{10}H_9FN_2O_2$   
208,19 g/mol

$^1H$  NMR ( $CDCl_3$ , 300 MHz, ppm)  $\delta$ : 7.78 (d,  $J$  = 3.0 Hz, 1H); 4.62 (t, 8.5 Hz, 2H); 3.94 (t,  $J$  = 4.8 Hz, 2H); 3.50 (t,  $J$  = 8.5 Hz, 2H); 3.19 (t,  $J$  = 4.8 Hz, 2H)

$^{13}C$  NMR ( $CDCl_3$ , 100 MHz, ppm (partial data))  $\delta$ : 165.8; 154.3; 131.1 (d,  $J$  = 12.5 Hz, CH); 70.2; 63.3; 46.1 (d,  $J$  = 7.4 Hz, CH); 28.5

$^{13}C$  NMR ( $CDCl_3$ , 100 MHz, ppm)  $\delta$ : 162.4; 151.1; 134.4 (q,  $J$  = 27.9 Hz, CH); 70.5; 63.6; 46.4; 28.8

$^{19}F$  NMR ( $CDCl_3$ , 376 MHz, ppm)  $\delta$ : - 154.9 ppm

**Mp** : 91 °C



**HRMS-ESI**  $m/z$  calcd for  $[M+H]^+$  209.1825, found 209.1831

Methyl 1-(5-fluoro-2,3-dihydrofuro[2,3-b]pyridin-4-yl)-1H-indole-3-carboxylate (**4h**)

**Compound 4h** was obtained from **3h** (34 mg, 0.1 mmol) following the general procedure C. After purification of the crude material by column chromatography (Petroleum ether/EtOAc: 3:7), **4h** was isolated as a yellow solid (17 mg, 54 % yield).

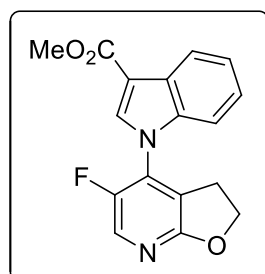

$C_{17}H_{13}FN_2O_3$   
312,30 g/mol

**$^1H$  NMR** ( $CDCl_3$ , 300 MHz, ppm)  $\delta$ : 8.28 (m, 1H); 8.11 (s, 1H); 7.92 (d,  $J$  = 1.2 Hz, 1H); 7.40 – 7.35 (2H); 7.18 (m, 1H); 4.75 (t,  $J$  = 8.6 Hz, 2H); 3.96 (s, 3H); 3.22 (t,  $J$  = 8.6 Hz, 2H)

**$^{13}C$  NMR** ( $CDCl_3$ , 100 MHz, ppm)  $\delta$ : 164.8; 161.4; 156.1; 147.0 (d,  $J$  = 19.8 Hz, CH); 138.8; 135.4; 125.5; 124.7; 123.9; 122.2; 111.8; 110.7; 72.3; 68.1; 66.4; 51.7; 19.5

**$^{19}F$  NMR** ( $CDCl_3$ , 376 MHz, ppm)  $\delta$ : - 148.1

**Mp** : 147 °C

**HRMS-ESI**  $m/z$  calcd for  $[M+H]^+$  313.0983, found 313.0979

3-(5-Fluoro-6-(thiophen-3-yl)-2,3-dihydrofuro[2,3-b]pyridin-4-yl)oxazolidin-2-one (**4k**)

**Compound 4k** was obtained from **3k** (17 mg, 0.05 mmol) following the general procedure C. After purification of the crude material by column chromatography (Petroleum ether/EtOAc: 3:7), **4k** was isolated as a yellow solid (11 mg, 72 % yield).

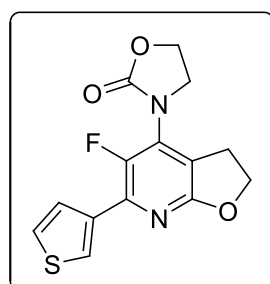

$C_{14}H_{11}FN_2O_3S$   
306,31 g/mol

**$^1H$  NMR** ( $CDCl_3$ , 300 MHz, ppm)  $\delta$ : 7.99 (t,  $J$  = 1.4 Hz, 1H); 7.76 (dt,  $J$  = 1.4 Hz, 5.1 Hz, 1H); 7.36 (dd,  $J$  = 3.0 Hz, 5.1 Hz, 1H); 4.71 (t,  $J$  = 8.4 Hz, 2H); 4.59 (t,  $J$  = 7.6 Hz, 2H); 4.18 (t,  $J$  = 7.6 Hz, 2H); 3.34 (t,  $J$  = 8.4 Hz, 2H)

**$^{13}C$  NMR** ( $CDCl_3$ , 100 MHz, ppm)  $\delta$ : 164.8; 154.82; 147.8 (d,  $J$  = 246.5 Hz, CH); 138.9 (d,  $J$  = 11.7 Hz, CH); 136.6; 132.16; 127.94 (d,  $J$  = 1.9 Hz); 126.5 (d,  $J$  = 5.9 Hz, CH); 125.6; 115.9; 70.4; 63.6; 46.6 (d,  $J$  = 7.4 Hz, CH); 28.8

**$^{19}F$  NMR** ( $CDCl_3$ , 376 MHz, ppm)  $\delta$ : - 144.2

**Mp** : 92 °C

**HRMS-ESI**  $m/z$  calcd for  $[M+H]^+$  307.0544, found 307.0547

3-(5-Fluoro-6-phenyl-2,3-dihydrofuro[2,3-b]pyridin-4-yl)oxazolidin-2-one (**4l**)

**Compound 4l** was obtained from **3l** (33 mg, 0.1 mmol) following the general procedure C. After purification of the crude material by column chromatography (Petroleum ether/EtOAc: 3:7), **4l** was isolated as a yellow solid (25 mg, 82 % yield).

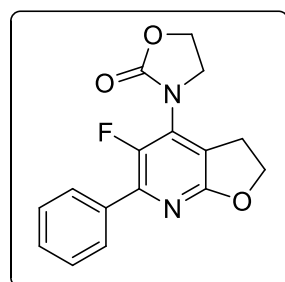

$C_{16}H_{13}FN_2O_3$   
300,28 g/mol

**$^1H$  NMR** ( $CDCl_3$ , 300 MHz, ppm)  $\delta$ : 7.91 – 7.88 (2H); 7.49-7.41 (3H); 4.70 (t,  $J$  = 8.6 Hz, 2H); 4.57 (t,  $J$  = 7.6 Hz, 2H); 4.15 (t,  $J$  = 7.6 Hz, 2H); 3.35 (t,  $J$  = 8.6 Hz, 2H)

**$^{13}C$  NMR** ( $CDCl_3$ , 100 MHz, ppm)  $\delta$ : 165.0; 154.8; 148.4 (d,  $J$  = 250.9 Hz, CH); 143.0 (d,  $J$  = 13.9 Hz, CH); 135.0 (d,  $J$  = 4.4 Hz, CH); 132.1 (d,  $J$  = 13.9 Hz, CH); 129.3 (d,  $J$  = 49.9 Hz); 129.0; 128.6; 116.5; 70.4; 63.6; 46.5 (d,  $J$  = 7.3 Hz, CH); 28.7

**$^{19}F$  NMR** ( $CDCl_3$ , 376 MHz, ppm)  $\delta$ : - 148.7

**Mp** : 142 °C

**HRMS- ESI**  $m/z$  calcd for  $[M+H]^+$  301.0983, found 301.0983

3-(5-Fluoro-6-(4-fluorophenyl)-2,3-dihydrofuro[2,3-b]pyridin-4-yl)oxazolidin-2-one (**4m**)

**Compound 4m** was obtained from **3m** (35 mg, 0.1 mmol) following the general procedure C. After purification of the crude material by column chromatography (Petroleum ether/EtOAc: 3:7), **4m** was isolated as a yellow solid (23 mg, 72 % yield).

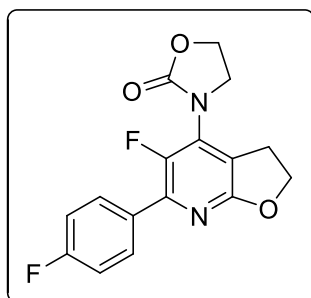

$C_{16}H_{12}F_2N_2O_3$   
318,27 g/mol

**$^1H$  NMR** ( $CDCl_3$ , 300 MHz, ppm)  $\delta$ : 7.92 (dd,  $J$  = 7.0 Hz, 8.8 Hz, 2H); 7.14 (t,  $J$  = 8.7 Hz, 2H); 4.72 (t,  $J$  = 8.7 Hz, 2H); 4.60 (t,  $J$  = 7.7 Hz, 2H); 4.18 (t,  $J$  = 7.7 Hz, 2H); 3.36 (t,  $J$  = 8.7 Hz, 2H)

**$^{13}C$  NMR** ( $CDCl_3$ , 100 MHz, ppm)  $\delta$ : 165.3; 165.0; 162.0; 154.8; 148.3 (d,  $J$  = 244.8 Hz, CH); 141.9 (d,  $J$  = 1.4 Hz, CH); 132.2 (d,  $J$  = 13.7 Hz, CH); 131.0 (t,  $J$  = 6.6 Hz, CH); 116.6; 115.70 (d,  $J$  = 22.5 Hz, CH); 70.5; 63.6; 46.6 (d,  $J$  = 7.1 Hz, CH); 28.8

**$^{19}F$  NMR** ( $CDCl_3$ , 376 MHz, ppm)  $\delta$ : - 112.9; - 145.9

**Mp** : 139 °C

**HRMS- ESI**  $m/z$  calcd for  $[M+H]^+$  319.0889, found 319.0878

3-(2-(Trifluoromethyl)-4b,5,6,7,8,8a-hexahydrobenzofuro[2,3-b]pyridin-4-yl)oxazolidin-2-one (**4p**)

**Compound 4p** was obtained from **3p** (36 mg, 0.1 mmol) following the general procedure C. After purification of the crude material by column chromatography (Petroleum ether/EtOAc: 3:7), **4p** was isolated as a yellow solid (25 mg, 72 % yield).

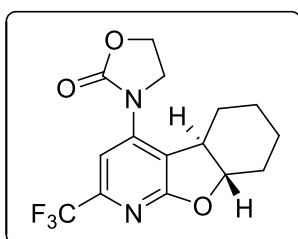

$C_{15}H_{15}F_3N_2O_3$   
328,29 g/mol

**$^1H$  NMR** ( $CDCl_3$ , 300 MHz, ppm)  $\delta$ : 7.01 (s, 1H); 4.64-4.51 (2H); 4.31 (q,  $J$  = 8.8 Hz, 1H); 4.06-3.87 (2H); 3.17 (1H); 2.40-2.24 (2H); 1.91-1.83 (2H); 1.66-1.52 (m, 2H); 1.46-1.39 (2H)

**$^{13}C$  NMR** ( $CDCl_3$ , 100 MHz, ppm)  $\delta$ : 170.8, 165.7, 146.0 (q,  $J$  = 34.5 Hz, CH), 142.2, 130.3 (q,  $J$  = 14.0 Hz, CH), 121.6 (q,  $J$  = 274.4 Hz,  $CF_3$ ), 117.2, 105.6 (q,  $J$  = 2.9 Hz, CH), 89.7, 48.7, 40.2, 37.2, 30.7, 21.1, 24.6

**$^{19}F$  NMR** ( $CDCl_3$ , 376 MHz, ppm)  $\delta$ : - 68.6

**Mp** : 142 °C

**HRMS- ESI**  $m/z$  calcd for  $[M+H]^+$  329.1112, found 329.1108

1-(2-(Trifluoromethyl)-4b,5,6,7,8,8a-hexahydrobenzofuro[2,3-b]pyridin-4-yl)azetidin-2-one (**4q**)

**Compound 4q** was obtained from **3q** (25 mg, 0.074 mmol) following the general procedure C. After purification of the crude material by column chromatography (Petroleum ether/EtOAc: 3:7), **4q** was isolated as a yellow solid (18 mg, 78 % yield).

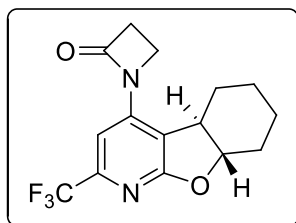

$C_{15}H_{15}F_3N_2O_2$   
312,2870 g/mol

$^1H$  NMR ( $CDCl_3$ , 300 MHz, ppm)  $\delta$ : 7.87 (bs, 1H); 4.63-4.50 (2H); 4.36 (t,  $J$  = 8.1 Hz, 1H); 4.00 (t,  $J$  = 10.9 Hz, 1H), 3.76-3.72 (2H), 2.36-2.17 (4H), 1.87-1.83 (4H)

$^{13}C$  NMR ( $CDCl_3$ , 100 MHz, ppm)  $\delta$ : 170.8; 155.1; 145.9 (q,  $J$  = 35.9 Hz, CH); 142.7; 122.5 (q,  $J$  = 283.9 Hz,  $CF_3$ ); 107.9 (d,  $J$  = 2.9 Hz, CH); 90.0; 63.0; 49.1; 45.8; 46.1; 30.6; 28.0; 25.9; 24.5

$^{19}F$  NMR ( $CDCl_3$ , 376 MHz, ppm)  $\delta$ : - 69.1

**Mp** : 136 °C

**HRMS- ESI**  $m/z$  calcd for  $[M+H]^+$  313.1158, found 313.1163

#### 3-(6'-(Trifluoromethyl)-3'H-spiro[cyclobutane-1,2'-furo[2,3-b]pyridine]-4'-yl)oxazolidin-2-one (**4r**)

**Compound 4r** was obtained from **3r** (34 mg, 0.1 mmol) following the general procedure C. After purification of the crude material by column chromatography (Petroleum ether/EtOAc: 4:6), **4r** was isolated as a white solid (29 mg, 91 % yield).

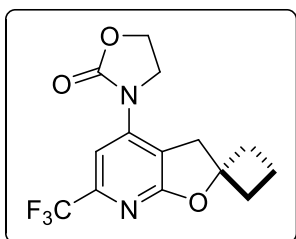

$C_{14}H_{13}F_3N_2O_3$   
314,26 g/mol

$^1H$  NMR ( $CDCl_3$ , 300 MHz, ppm)  $\delta$ : 7.13 (s, 1H), 4.57 (t,  $J$  = 8.0 Hz, 2H), 4.16 (t,  $J$  = 8.0 Hz, 2H), 3.52 (s, 2H), 2.69-2.58 (2H), 2.27-2.18 (2H), 1.93 (m, 1H), 1.72 (m, 1H)

$^{13}C$  NMR ( $CDCl_3$ , 100 MHz, ppm)  $\delta$ : 169.1; 153.9; 146.4 (q,  $J$  = 35.2 Hz, CH); 143.1; 121.6 (q,  $J$  = 275.8 Hz,  $CF_3$ ); 114.8; 105.7 (d,  $J$  = 2.9 Hz, CH); 87.2; 62.4; 45.7; 40.9; 36.6; 12.2

$^{19}F$  NMR ( $CDCl_3$ , 376 MHz, ppm)  $\delta$ : - 69.1

**Mp** : 129 °C

**HRMS- ESI**  $m/z$  calcd for  $[M+H]^+$  315.0951, found 315.0948

#### 3-(6'-(Trifluoromethyl)-3'H-spiro[cyclohexane-1,2'-furo[2,3-b]pyridine]-4'-yl)oxazolidin-2-one (**4s**)

**Compound 4s** was obtained from **3s** (19 mg, 0.05 mmol) following the general procedure C. After purification of the crude material by column chromatography (Petroleum ether/EtOAc: 3:7), **4s** was isolated as a white solid (11 mg, 64 % yield).

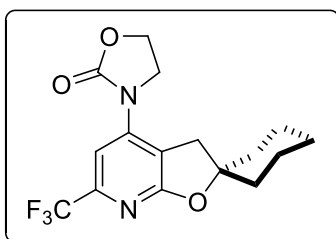

$C_{16}H_{17}F_3N_2O_3$   
342,31g/mol

$^1H$  NMR ( $CDCl_3$ , 300 MHz, ppm)  $\delta$ : 7.12 (s, 1H), 4.60 (br t,  $J$  = 8.9 Hz, 2H); 4.15 (d, 8.9 Hz, 2H); 3.16 (s, 2H); 2.96-1.56 (8H); 1.59-1.39 (2H)

$^{13}C$  NMR ( $CDCl_3$ , 100 MHz, ppm)  $\delta$ : 169.5; 162.0; 154.2; 146.9 (q,  $J$  = 32.0 Hz, CH); 143.7; 121.6; 115.6 (q, 275.3 Hz,  $CF_3$ ); 105.7 (d,  $J$  = 3.2 Hz, CH); 88.7; 62.7; 46.1; 41.0; 37.7; 34.5; 25.2; 22.8

$^{19}F$  NMR ( $CDCl_3$ , 376 MHz, ppm)  $\delta$ : - 69.1

**Mp** : 164 °C

**HRMS- ESI**  $m/z$  calcd for  $[M+H]^+$  343.1264, found 343.1268

#### *N*-Methyl-*N*-(6'-(trifluoromethyl)-3'H-spiro[cyclobutane-1,2'-furo[2,3-b]pyridine]-4'-yl)methanesulfonamide (**4t**)

**Compound 4t** was obtained from **3t** (15 mg, 0.05 mmol) following the general procedure C. After purification of the crude material by column chromatography (Petroleum ether/EtOAc: 3:7), **4t** was isolated as a yellow solid (11 mg, 84 % yield).

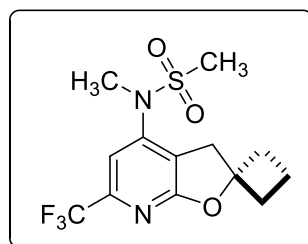

$C_{13}H_{15}F_3N_2O_3S$   
336,33 g/mol

$^1H$  NMR ( $CDCl_3$ , 300 MHz, ppm)  $\delta$ : 7.06 (s, 1H); 3.54 (s, 2H); 3.30 (s, 3H); 2.97 (s, 3H); 2.62 (2H); 2.26-2.20 (2H); 1.85 (m, 1H); 1.71 (m, 1H)

$^{13}C$  NMR ( $CDCl_3$ , 100 MHz, ppm)  $\delta$ : 169.6; 147.3 (q,  $J$  = 33.7 Hz, CH); 147.2; 123.7; 121.5 (q,  $J$  = 272.9 Hz,  $CF_3$ ); 110.2 (q,  $J$  = 2.9 Hz, CH), 88.1, 40.2; 40.0; 36.9; 36.8; 12.5

$^{19}F$  NMR ( $CDCl_3$ , 376 MHz, ppm)  $\delta$ : - 68.9 ppm

**Mp** : 164 °C

**HRMS- ESI**  $m/z$  calcd for  $[M+H]^+$  337.0828, found 337.834

Methyl 1-(6'-(trifluoromethyl)-3'H-spiro[cyclobutane-1,2'-furo[2,3-b]pyridine]-4'-yl)-1H-indole-3-carboxylate (**4u**)

**Compound 4u** was obtained from **3u** (33 mg, 0.1 mmol) following the general procedure C. After purification of the crude material by column chromatography (Petroleum ether/EtOAc: 3:7), **4u** was isolated as a yellow solid (28 mg, 92 % yield).

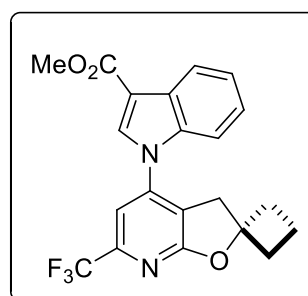

$C_{21}H_{17}F_3N_2O_3$   
402,37 g/mol

$^1H$  NMR ( $CDCl_3$ , 300 MHz, ppm)  $\delta$ : 8.29 (t,  $J$  = 4.0 Hz, 1H), 7.96 (s, 1H), 7.44-7.36 (4H), 3.98 (s, 3H), 3.41 (s, 2H), 2.73-2.65 (2H), 2.29-2.21 (m, 2H), 1.99 (m, 1H), 1.72 (m, 1H)

$^{13}C$  NMR ( $CDCl_3$ , 100 MHz, ppm)  $\delta$ : 169.1, 165.1; 148.4 (q,  $J$  = 32.6 Hz, CH); 147.7; 147.4; 143.9; 136.0; 132.4; 127.2; 124.9; 123.8; 122.9; 120.0; 121.2 (q,  $J$  = 276.0 Hz,  $CF_3$ ); 110.7 (d,  $J$  = 3.7 Hz, CH); 83.4; 51.8; 39.7; 36.9; 12.5

$^{19}F$  NMR ( $CDCl_3$ , 376 MHz, ppm)  $\delta$ : - 69.1 ppm

**Mp** : 169 °C

**HRMS- ESI**  $m/z$  calcd for  $[M+H]^+$  403.1257, found 403.1264

3-(6-(Trifluoromethyl)-2,3-dihydrothieno[2,3-b]pyridin-4-yl)oxazolidin-2-one (**4v**)

**Compound 4v** was obtained from **3v** (32 mg, 0.1 mmol) following the general procedure C. After purification of the crude material by column chromatography (Petroleum ether/EtOAc: 4:6), **4v** was isolated as a yellow oil (20.5 mg, 71 % yield).

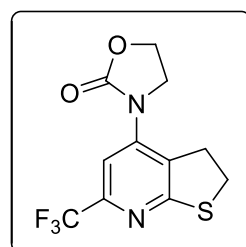

$C_{11}H_9F_3N_2O_2S$   
290,26 g/mol

$^1H$  NMR ( $CDCl_3$ , 300 MHz, ppm)  $\delta$ : 7.15 (s, 1H); 4.56 (t,  $J$  = 7.9 Hz, 2H); 4.11 (t,  $J$  = 8.1 Hz, 2H); 3.44 (br m, 4H)

$^{13}C$  NMR ( $CDCl_3$ , 100 MHz, ppm)  $\delta$ : 171.0; 154.2; 147.8 (q,  $J$  = 36.7 Hz); 141.3; 131.2; 121.1 (q,  $J$  = 262.6 Hz); 109.2 (d,  $J$  = 3.8 Hz); 62.6; 46.1; 33.1; 30.1

$^{19}F$  NMR ( $CDCl_3$ , 376 MHz, ppm)  $\delta$ : -67.91

**HRMS-ESI**  $m/z$  calcd for  $[M+H]^+$  291.04096, found 291.04098

3-(1-acetyl-6-(trifluoromethyl)-2,3-dihydro-1H-pyrrolo[2,3-b]pyridin-4-yl)oxazolidin-2-one (**4w**)

**Compound 4w** was obtained from **3w** (21 mg, 0.06 mmol) following the general procedure C. After purification of the crude material by column chromatography (Petroleum ether/EtOAc: 2:8), **4w** was isolated as a yellow solid (18mg, 93 % yield).

**<sup>1</sup>H NMR** (CDCl<sub>3</sub>, 300 MHz, ppm)  $\delta$ : 7.21 (s, 1H); 4.58 (t,  $J$  = 8.5 Hz, 2H), 4.19-4.13 (4H); 3.2 (t,  $J$  = 8.5 Hz, 2H), 2.70 (s, 3H)

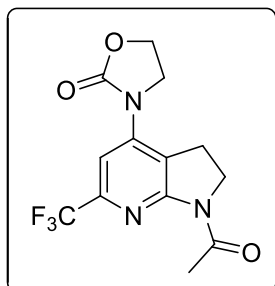

C<sub>13</sub>H<sub>12</sub>F<sub>3</sub>N<sub>3</sub>O<sub>3</sub>  
315,25 g/mol

**<sup>13</sup>C NMR** (CDCl<sub>3</sub>, 100 MHz, ppm)  $\delta$ : 170.3; 158.3; 153.9; 146.2 (q,  $J$  = 36.2 Hz); 142.8; 121.7; 121.2 (q,  $J$  = 273.3 Hz); 107.2 (d,  $J$  = 5.5 Hz); 62.5; 45.8; 45.7; 25.2; 24.5

**<sup>19</sup>F NMR** (CDCl<sub>3</sub>, 376 MHz, ppm)  $\delta$ : -69.3

**HRMS-ESI**  $m/z$  calcd for [M+Na]<sup>+</sup> 338.0723, found 338.0727

3-(1-Acetyl-6-(trifluoromethyl)-2,3-dihydro-1H-pyrrolo[2,3-b]pyridin-4-yl)oxazolidin-2-one (**4x**)

**Compound 4x** was obtained from **3w** (13.5 mg, 0.04 mmol) following the general procedure C. After purification of the crude material by column chromatography (Petroleum ether/EtOAc: 2:8), **4x** was isolated as a yellow oil (8.2 mg, 66 % yield).

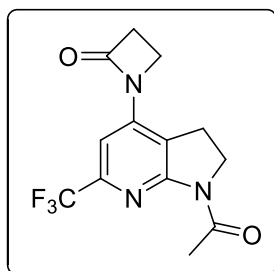

C<sub>13</sub>H<sub>12</sub>F<sub>3</sub>N<sub>3</sub>O<sub>2</sub>  
299,25 g/mol

**<sup>1</sup>H NMR** (CDCl<sub>3</sub>, 300 MHz, ppm)  $\delta$ : 7.5 (s, 1H); 4.14 (t,  $J$  = 8.1 Hz, 2H); 3.88 (t,  $J$  = 4.7 Hz, 2H); 3.33 (t,  $J$  = 8.1 Hz, 2H); 3.23 (t,  $J$  = 4.7 Hz, 2H); 2.68 (s, 3H)

**<sup>13</sup>C NMR** (CDCl<sub>3</sub>, 100 MHz, ppm)  $\delta$ : 170.7; 165.1; 158.3; 146.8 (q,  $J$  = 38.1 Hz); 147.8; 121.6 (q,  $J$  = 271.4 Hz); 114.4; 104.9 (d,  $J$  = 4.4 Hz); 46.0; 40.3; 37.7; 25.5; 24.2

**<sup>19</sup>F NMR** (CDCl<sub>3</sub>, 376 MHz, ppm)  $\delta$ : -68.4

**HRMS-ESI**  $m/z$  calcd for [M+H]<sup>+</sup> 300.09837, found 300.09523

## 2. NMR Spectra

### 2-(But-3-ynoxy)-4-(trifluoromethyl)pyrimidine (**2a**)

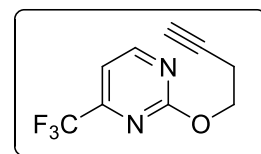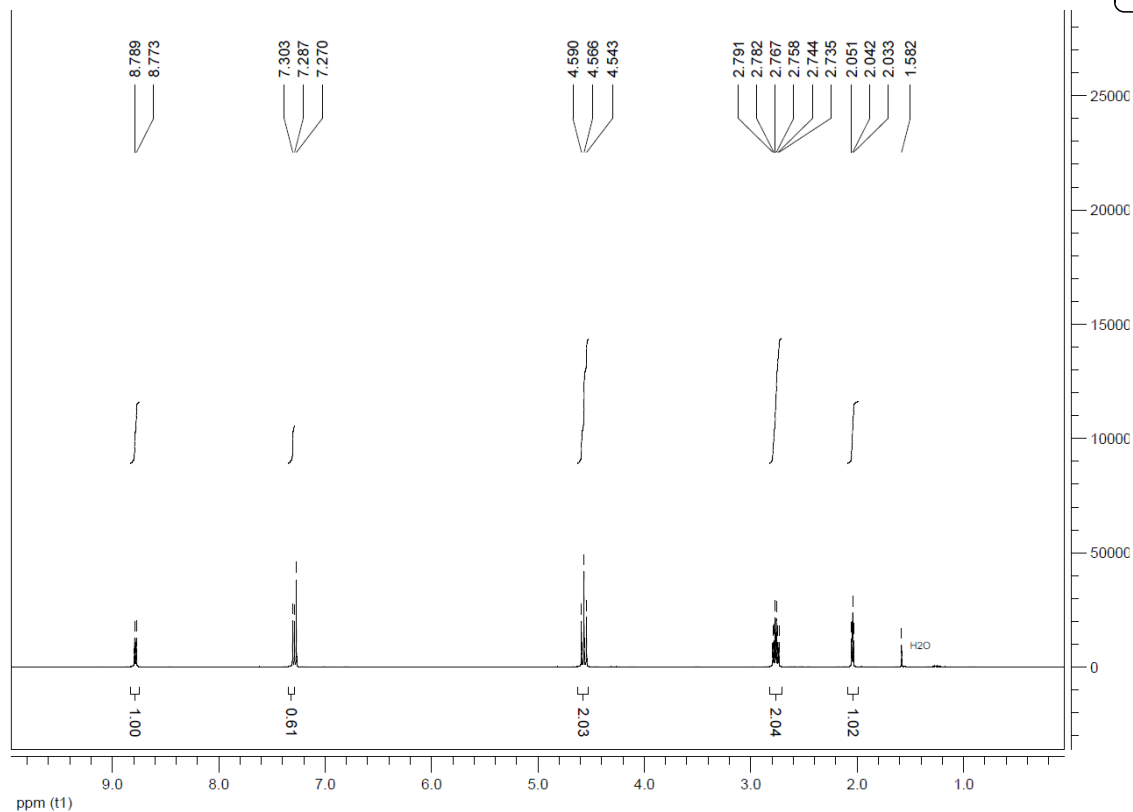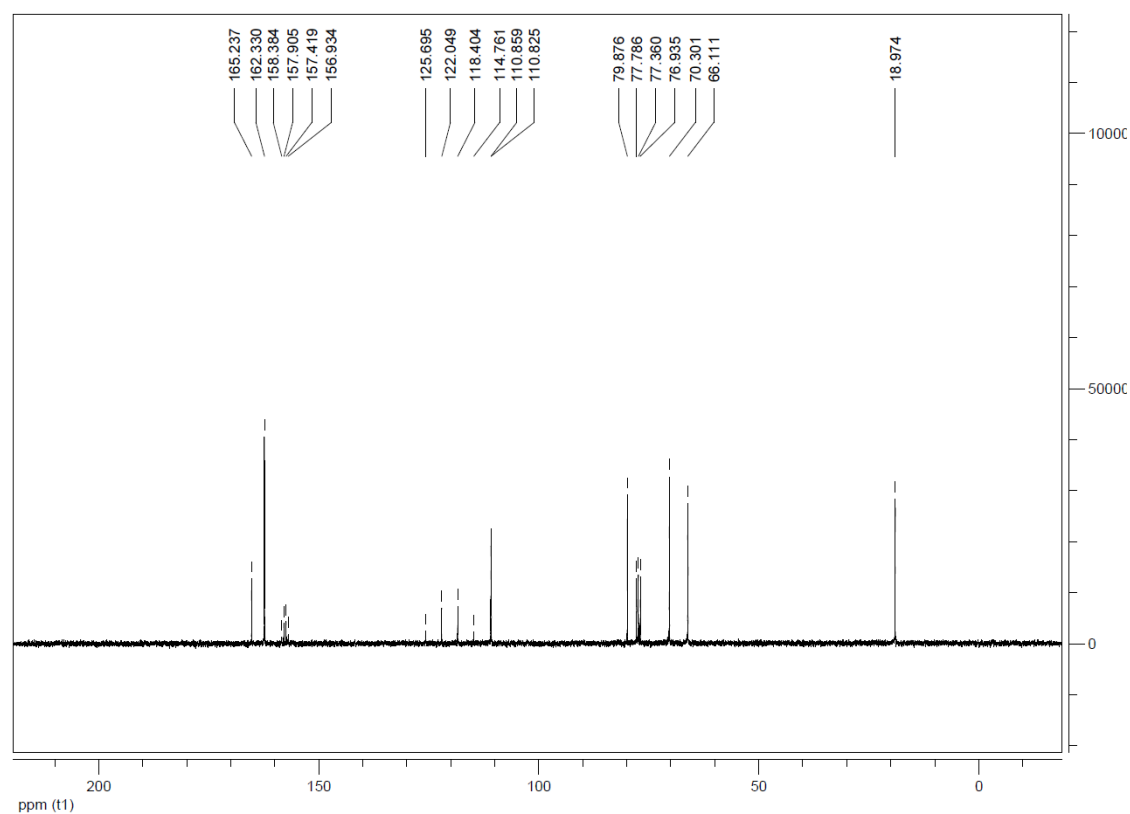

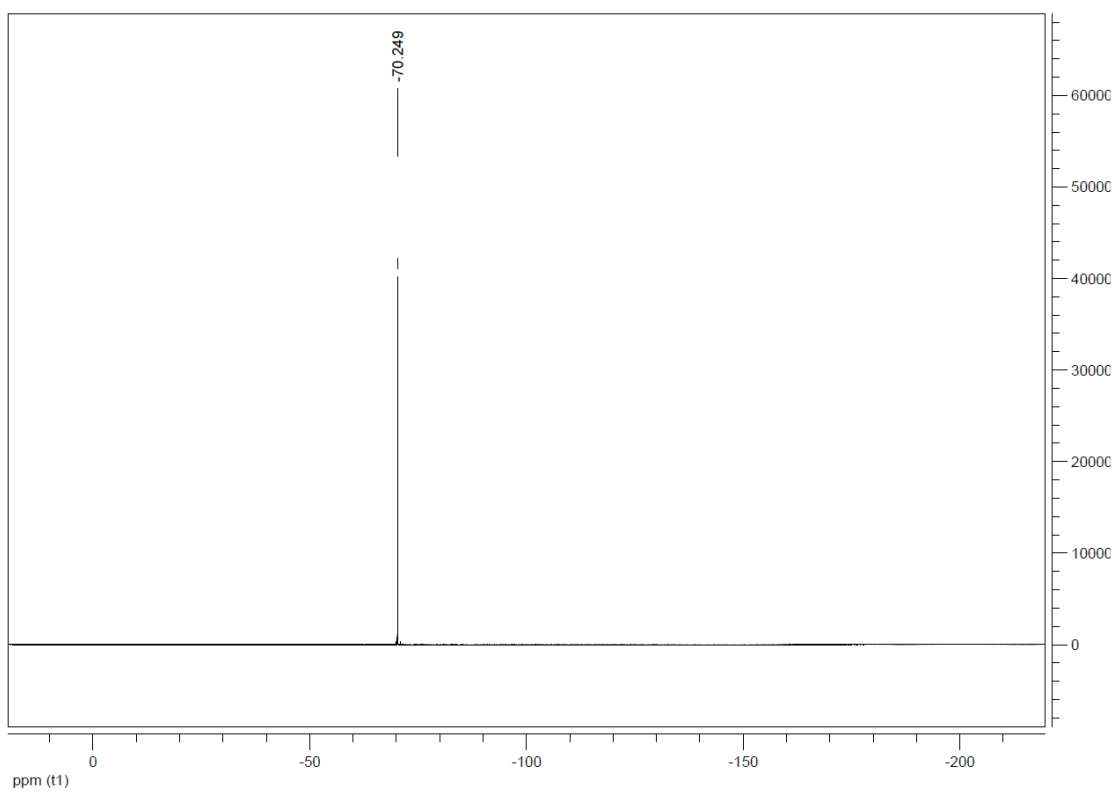

2-(But-3-yn-1-yloxy)-5-fluoropyrimidine (**2f**)

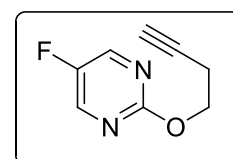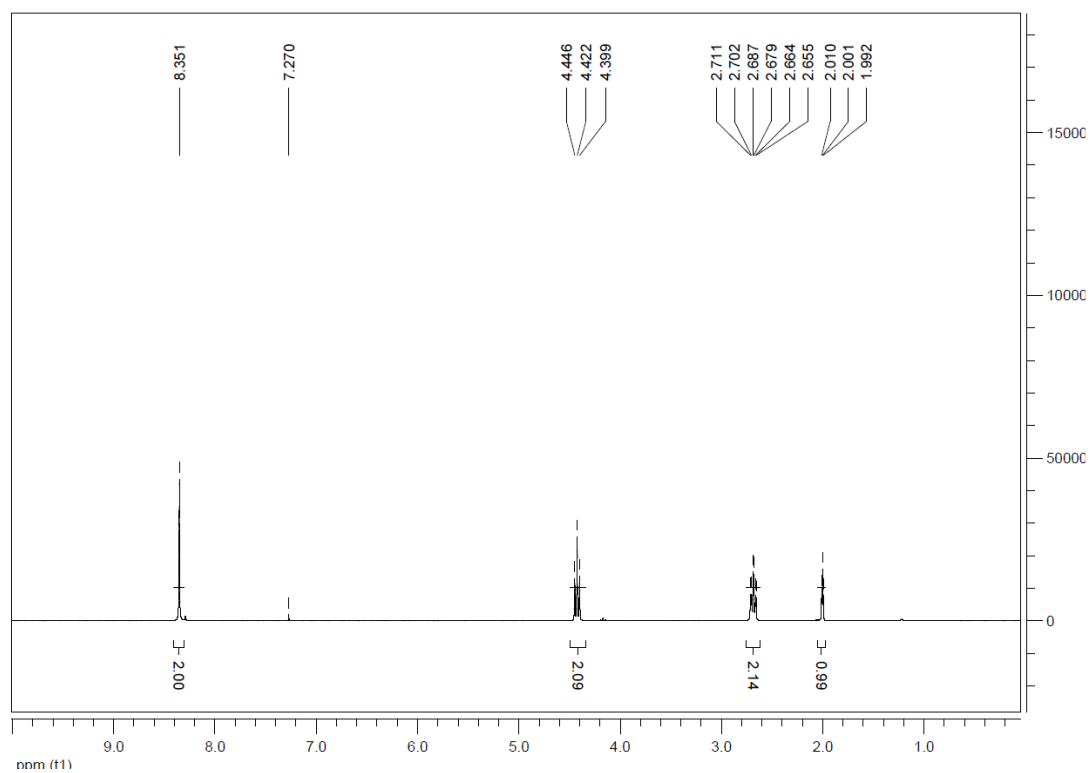

2-(But-3-ynyloxy)-5-chloropyrimidine (2i)

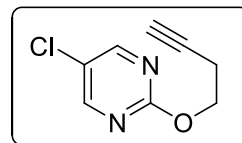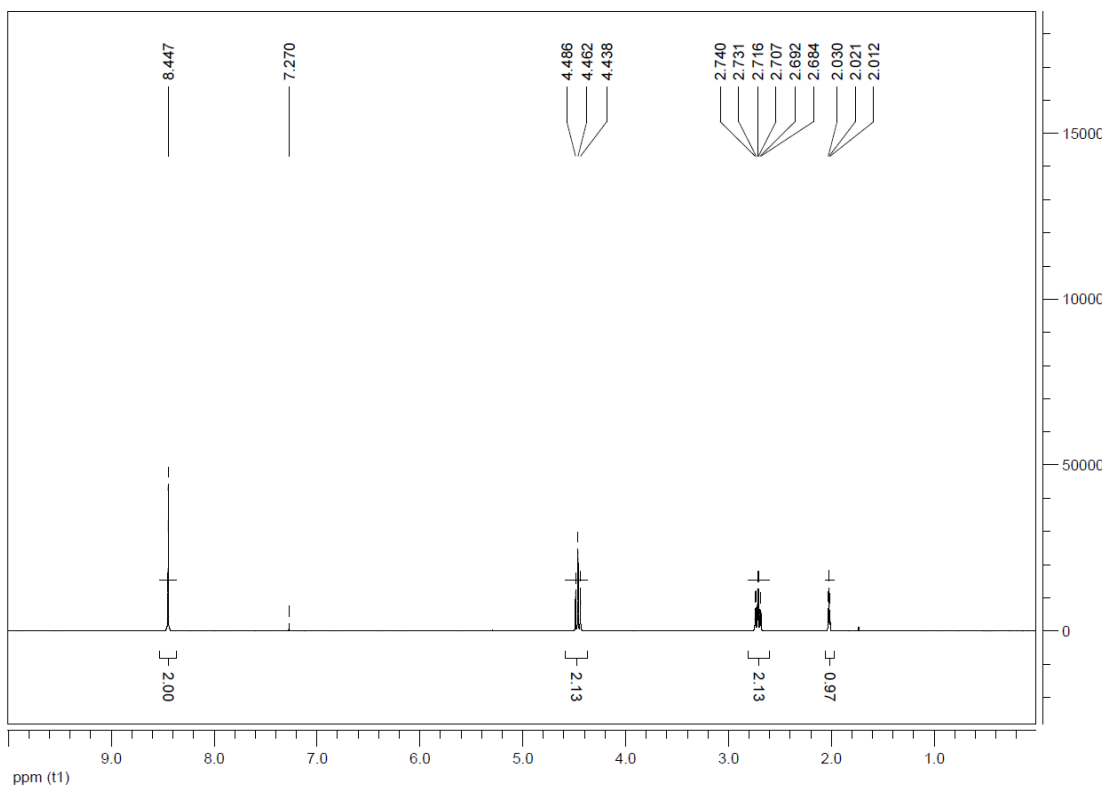

2-(But-3-ynyloxy)-5-(trifluoromethyl)pyrimidine (2j)

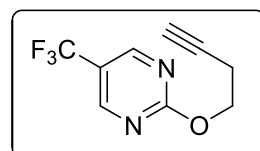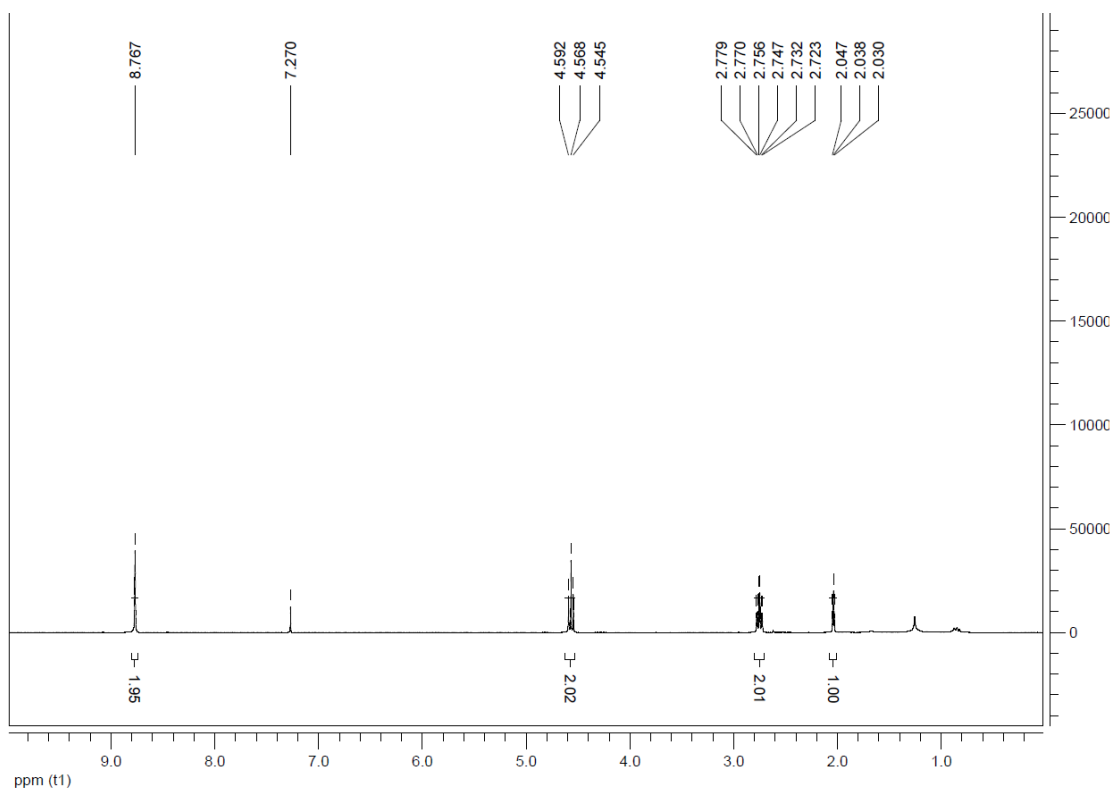



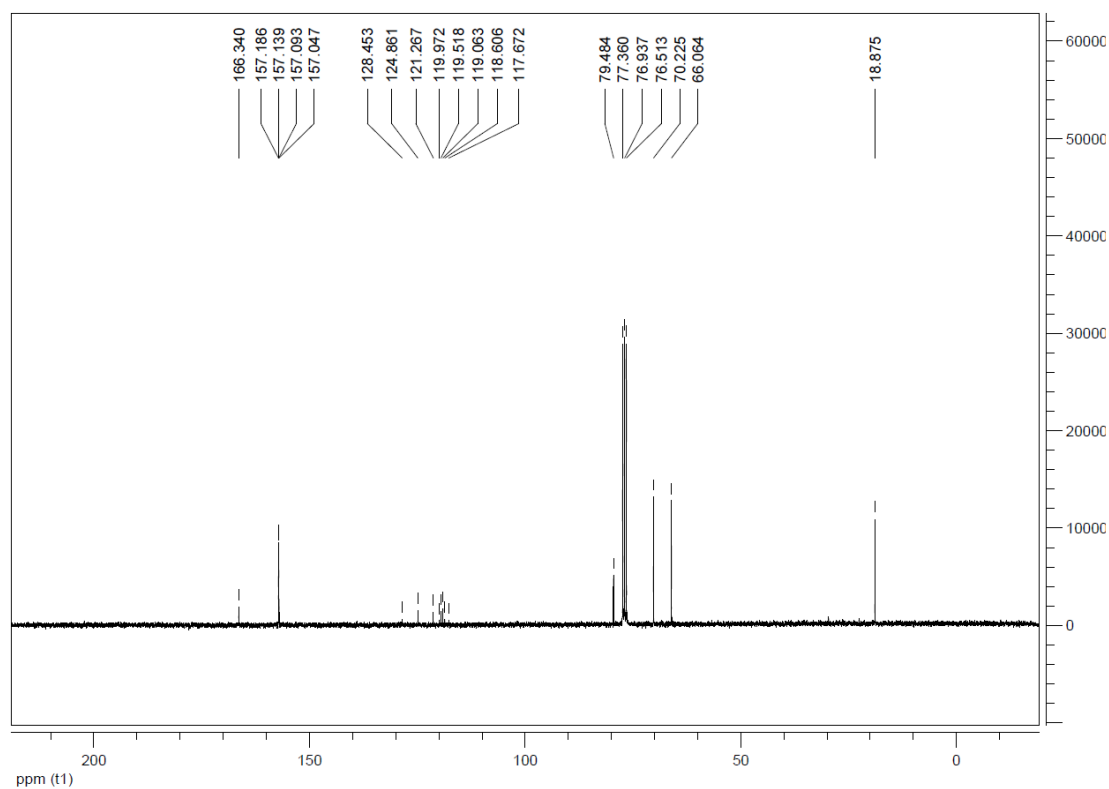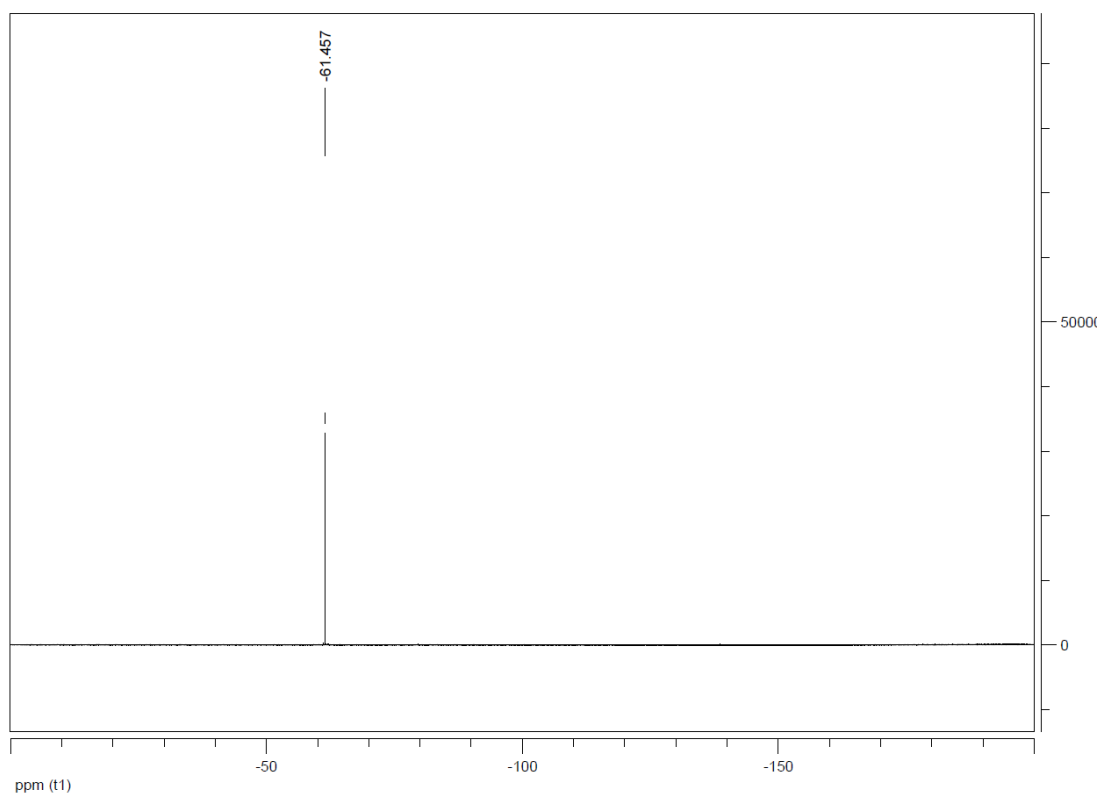

2-(But-3-ynyloxy)-5-fluoro-4-(thiophen-3-yl)pyrimidine (2k)

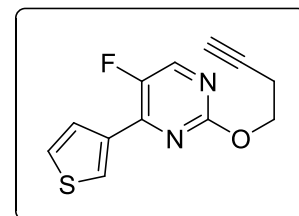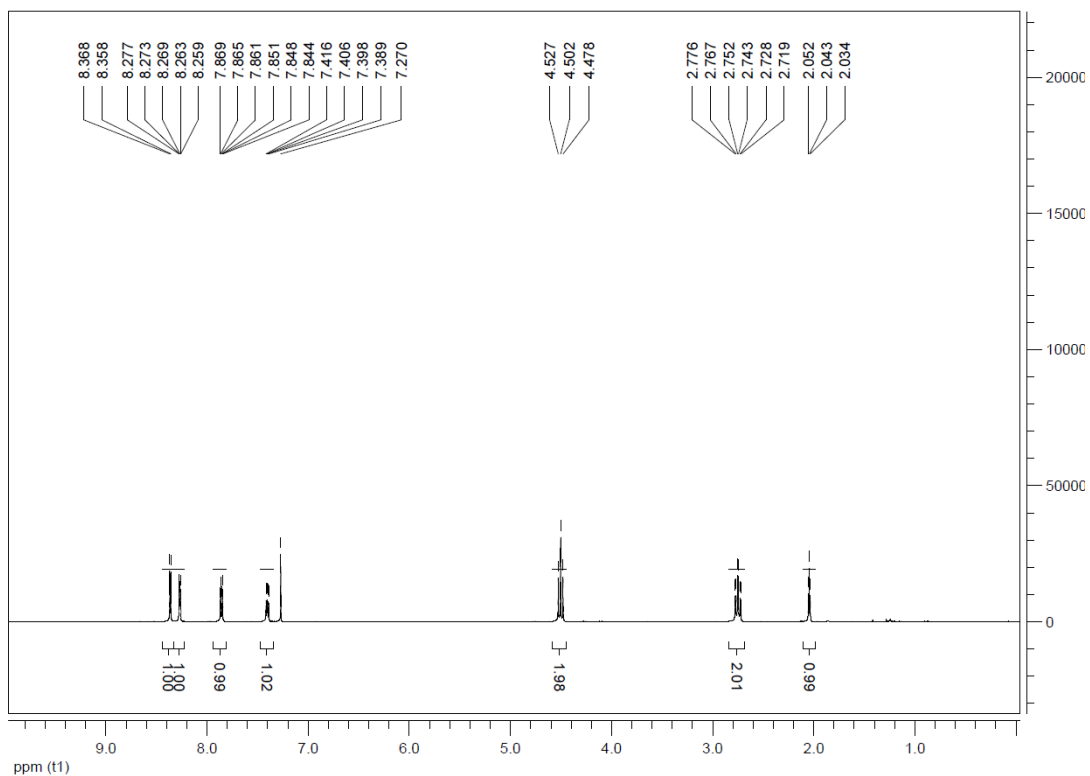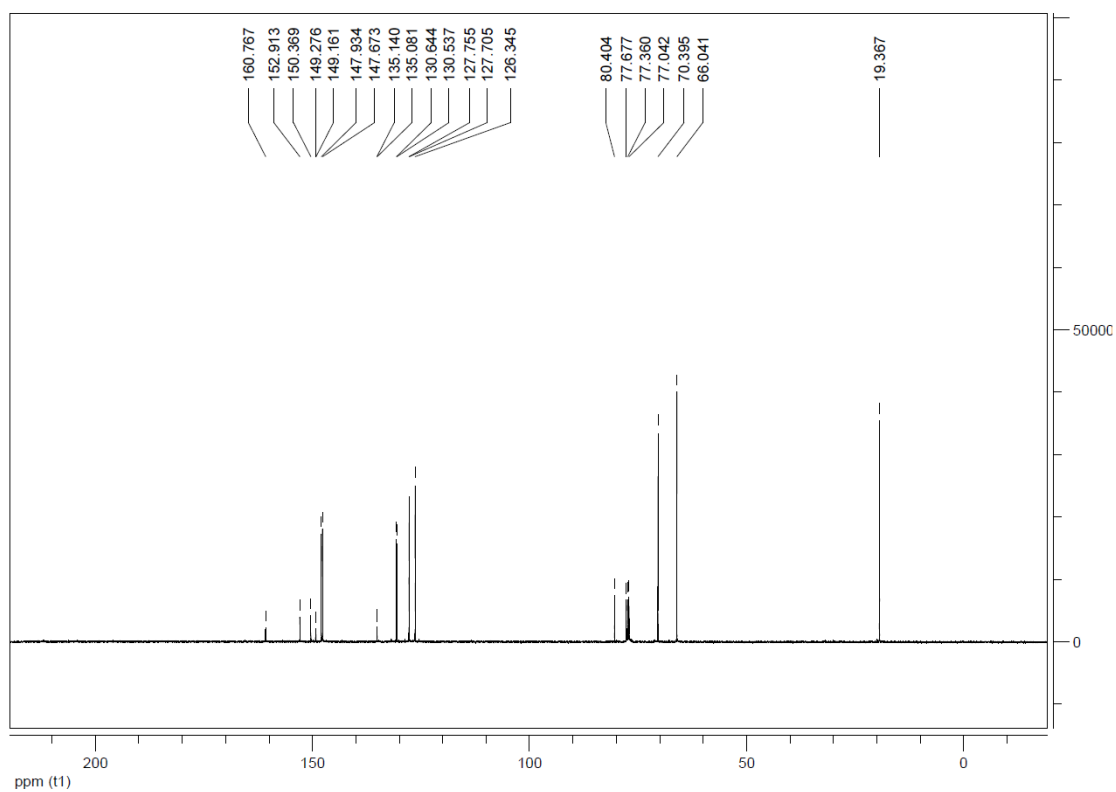

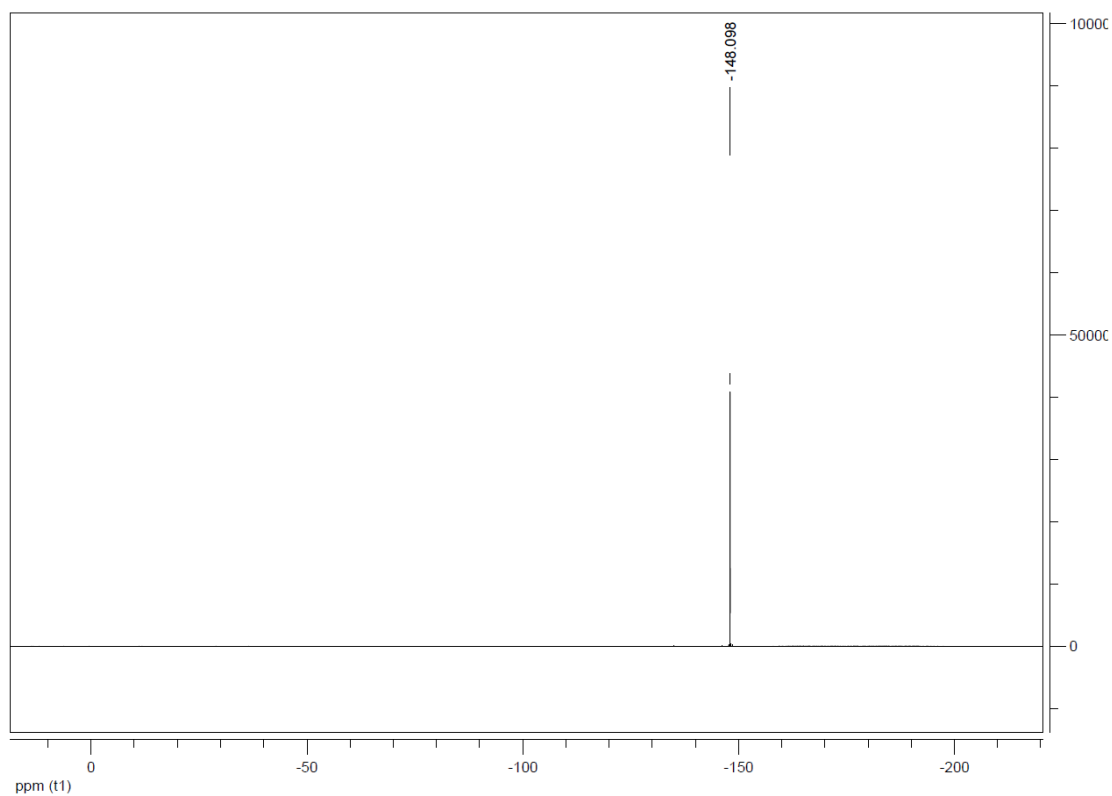

2-(But-3-yn-1-yloxy)-5-fluoro-4-phenylpyrimidine (21)

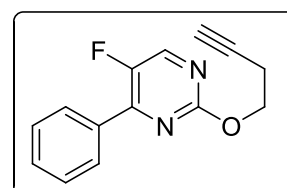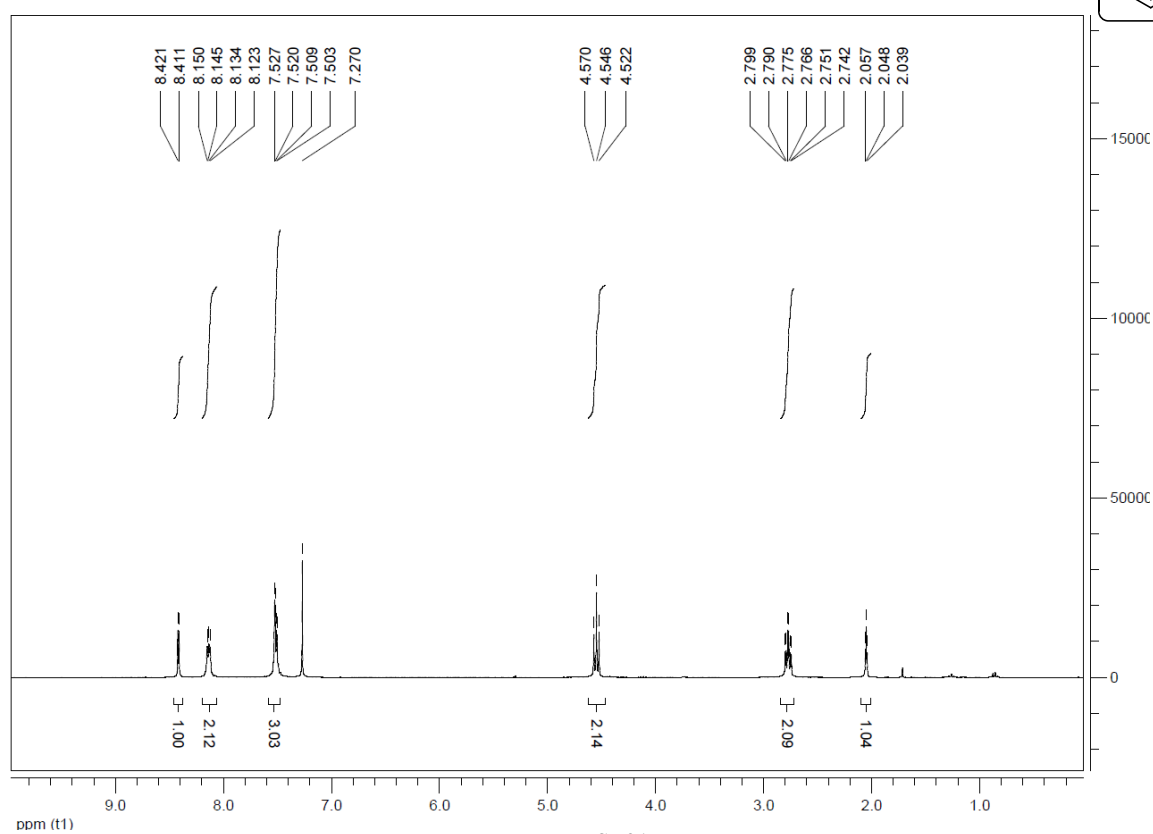

2-(But-3-ynyloxy)-5-fluoro-4-(4-fluorophenyl)pyrimidine (2m)

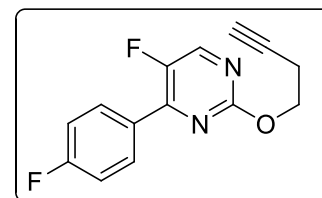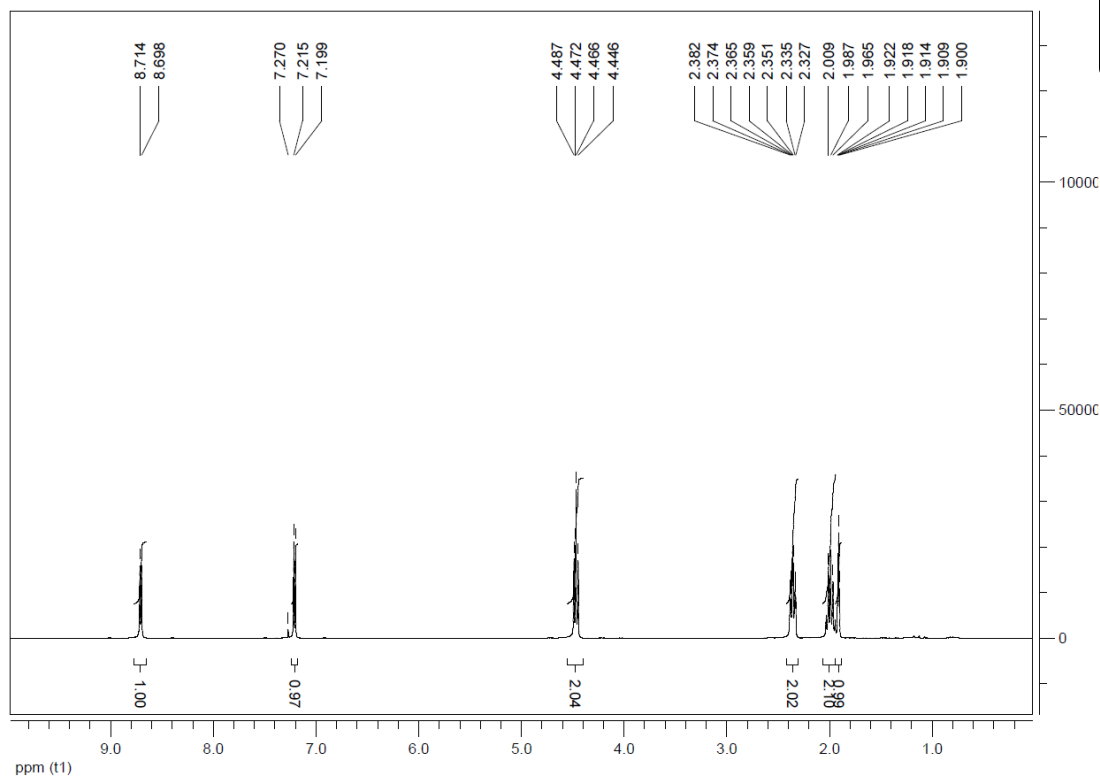

2-(Pent-4-ynyloxy)-4-(trifluoromethyl)pyrimidine (2n)

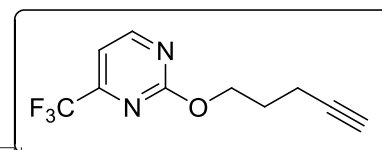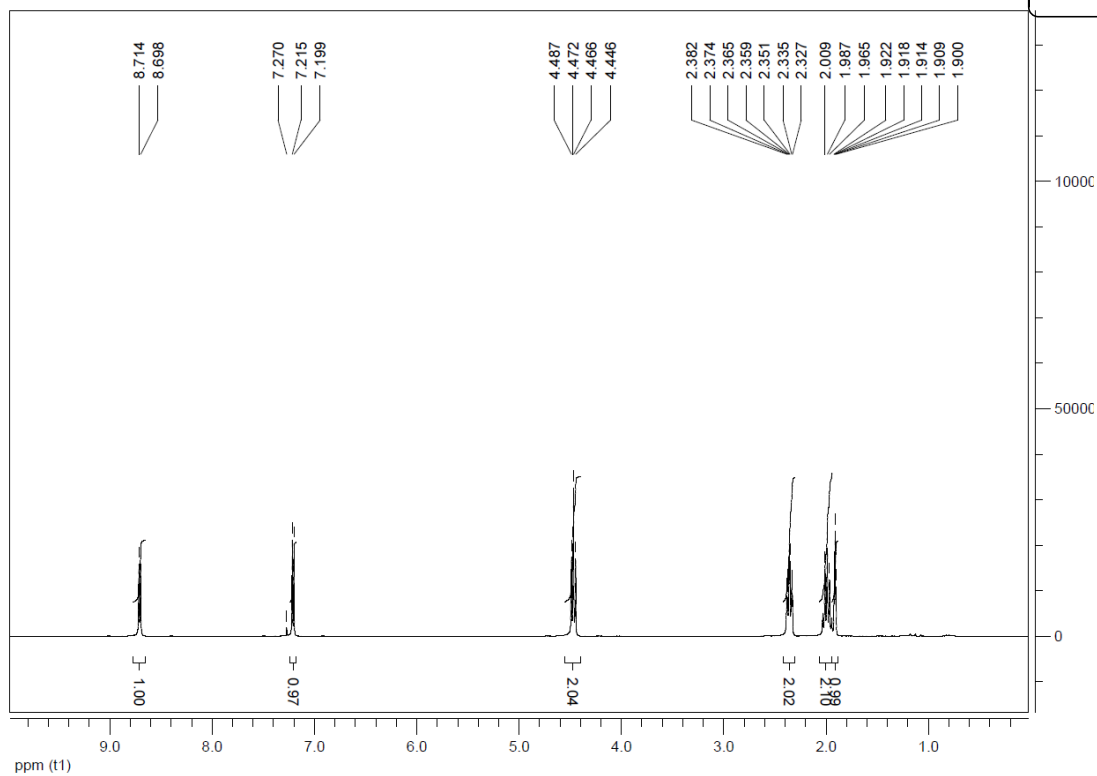

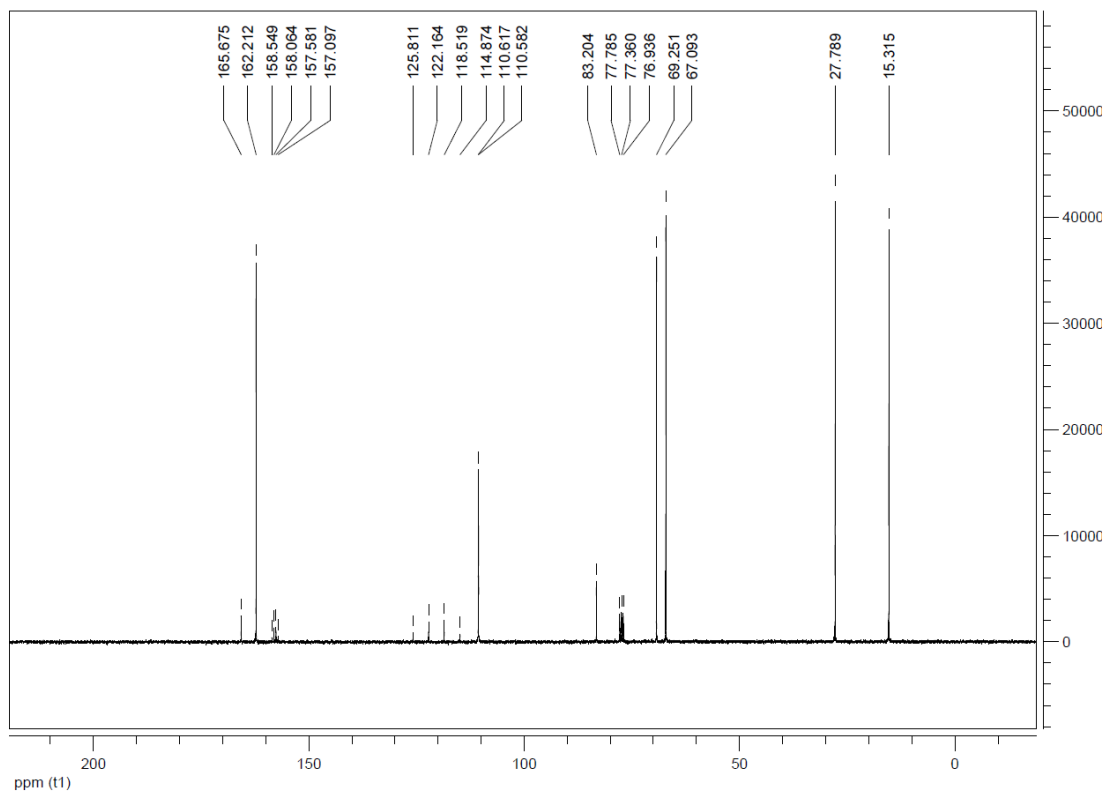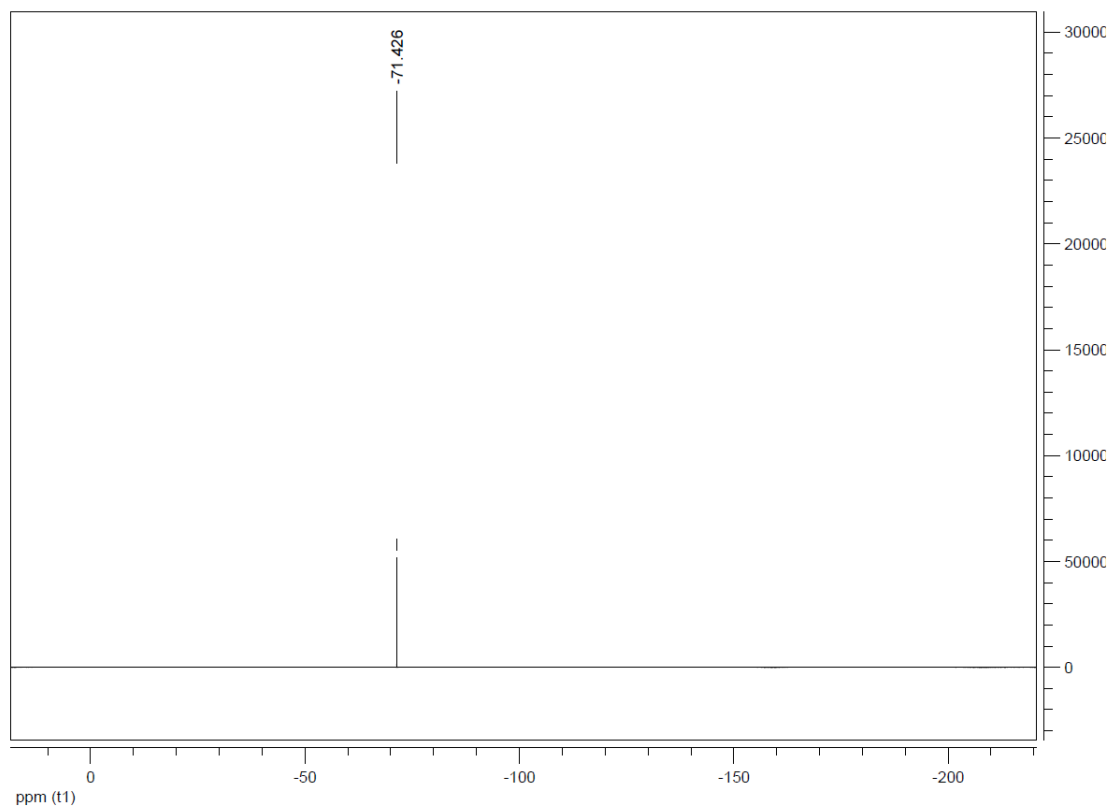

2-(Hex-5-ynyloxy)-4-(trifluoromethyl)pyrimidine (**2o**)

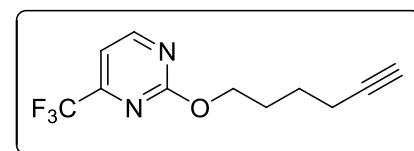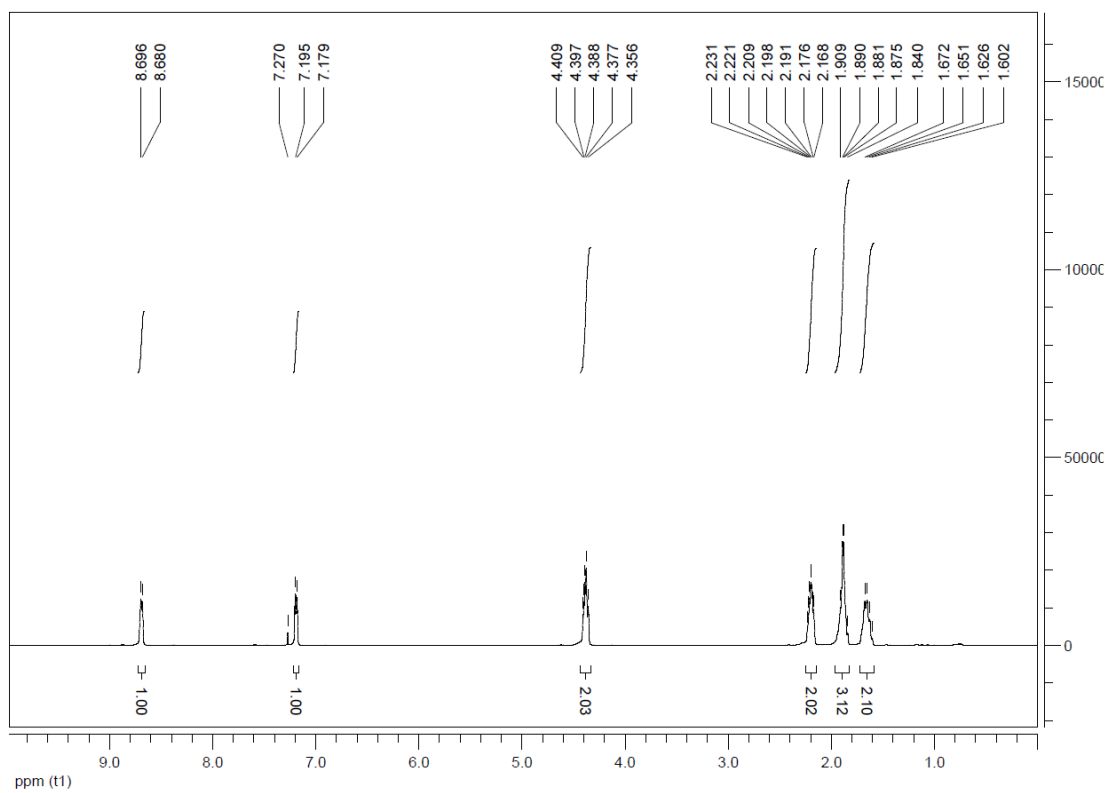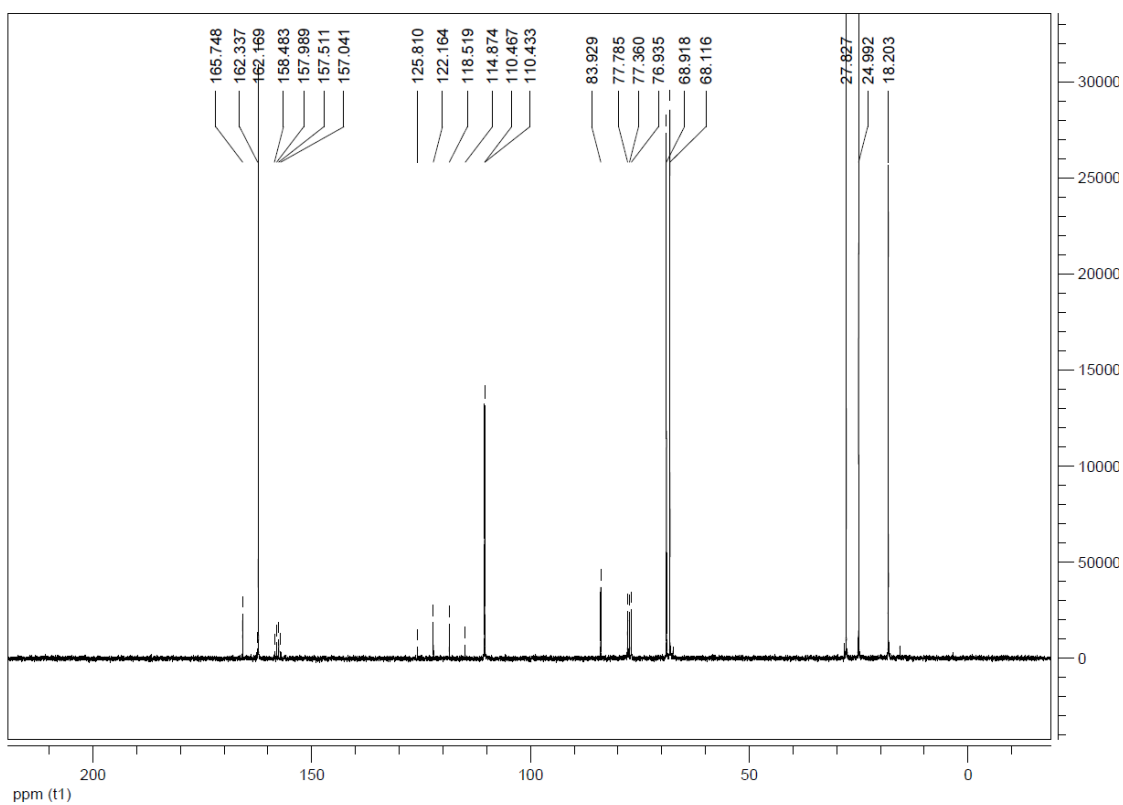

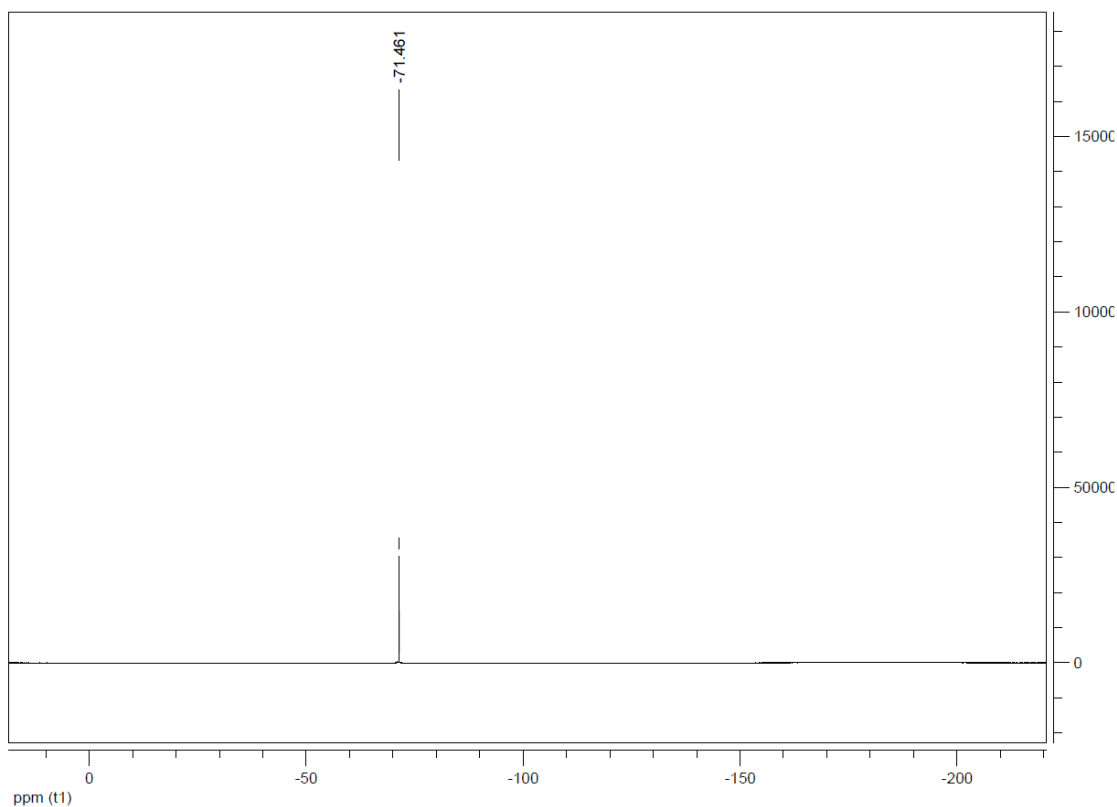

2-(2-Ethynylcyclohexyloxy)-4-(trifluoromethyl)pyrimidine (2p)

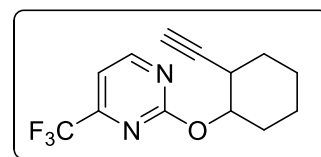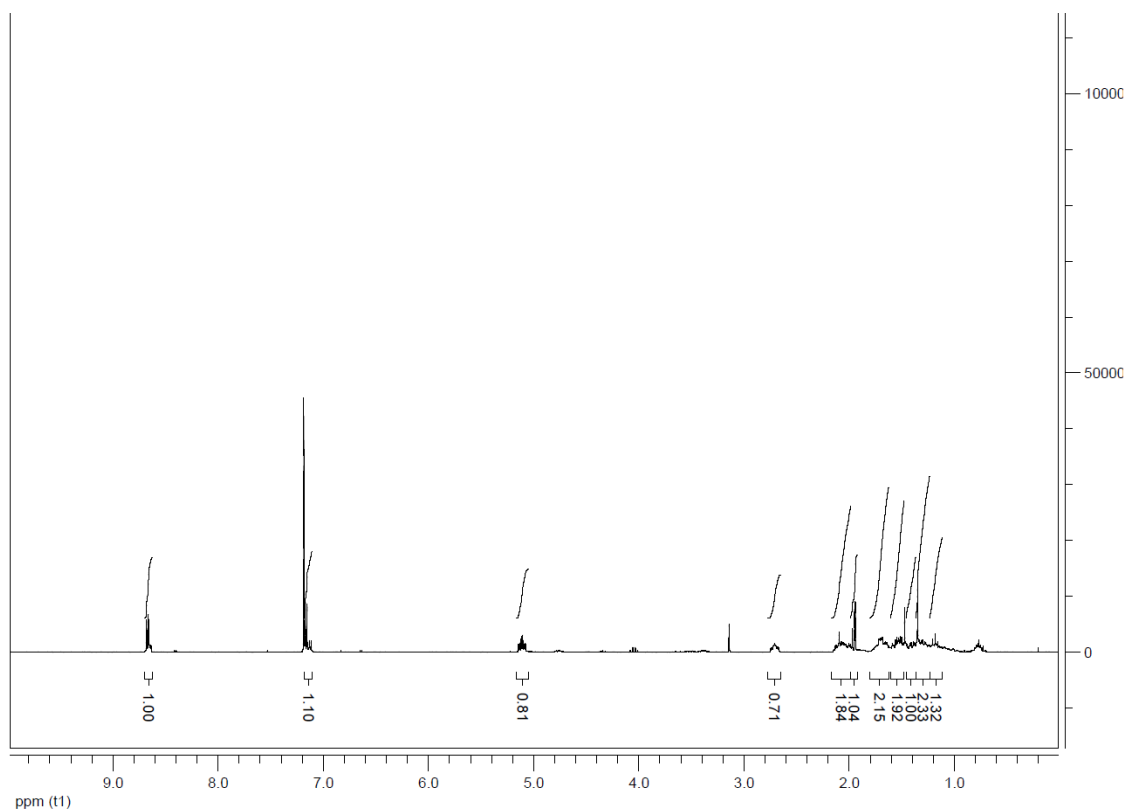

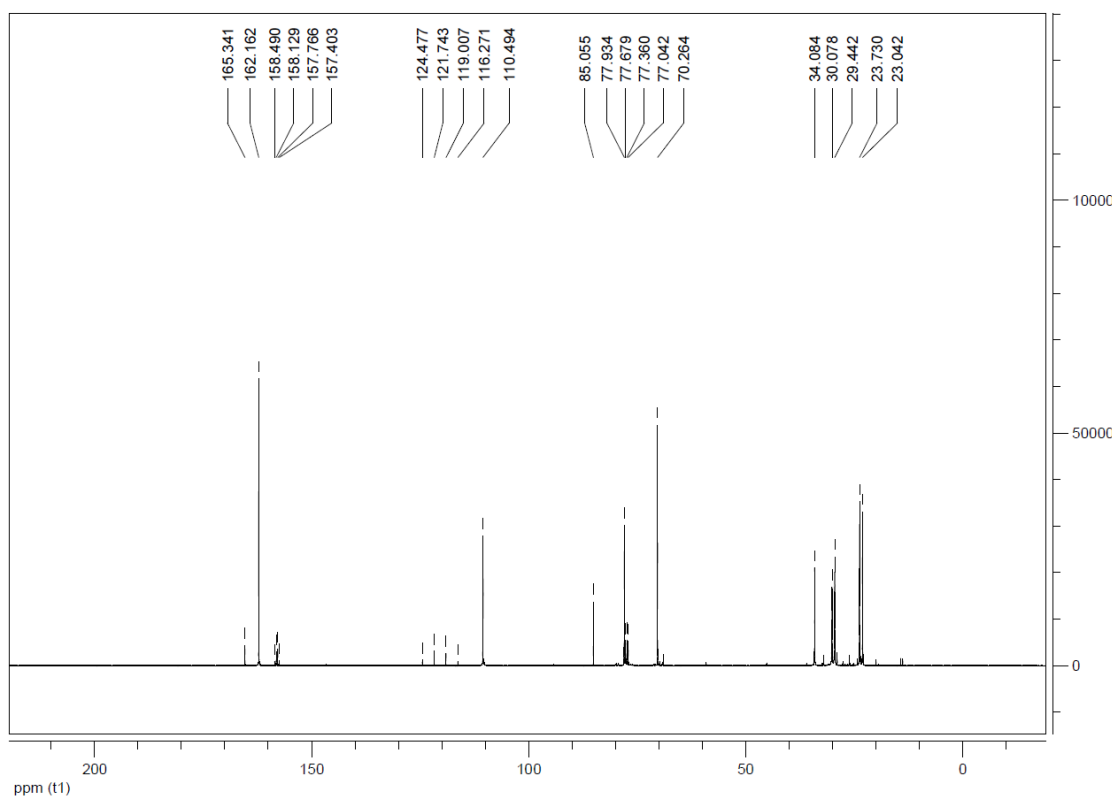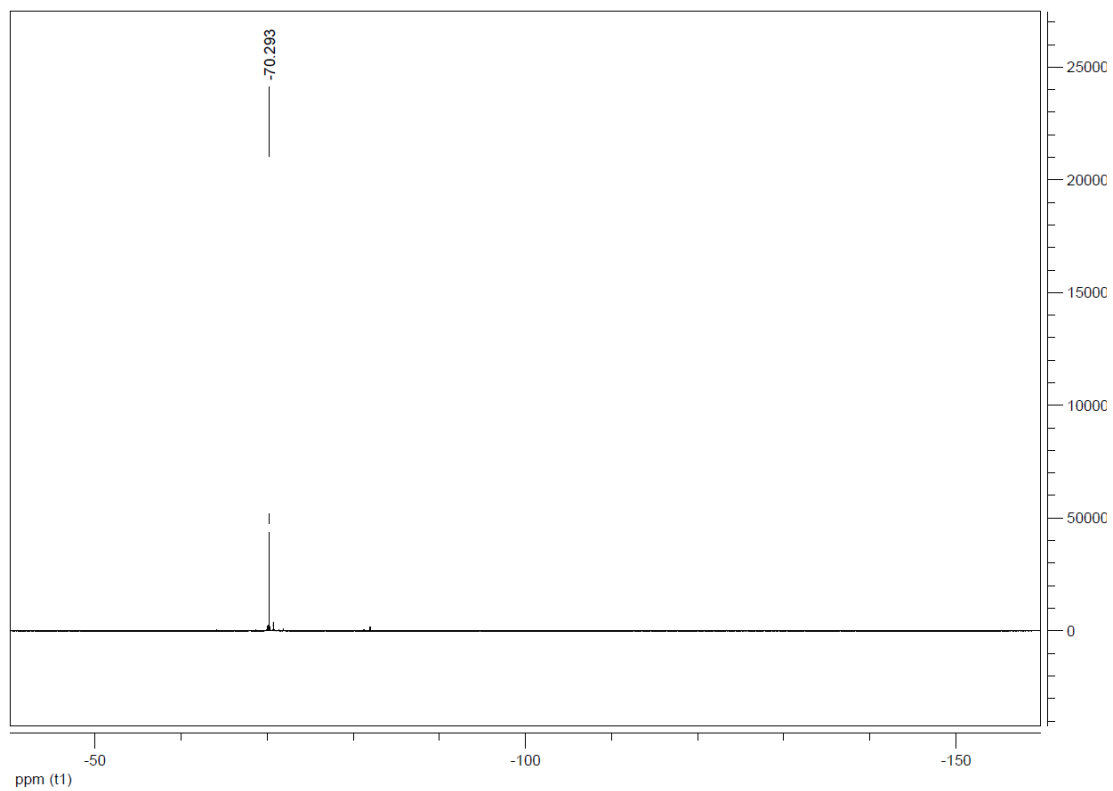



2-(1-(Prop-2-ynyl)cyclobutoxy)-4-(trifluoromethyl)pyrimidine (**2r**)

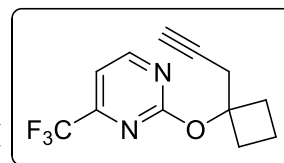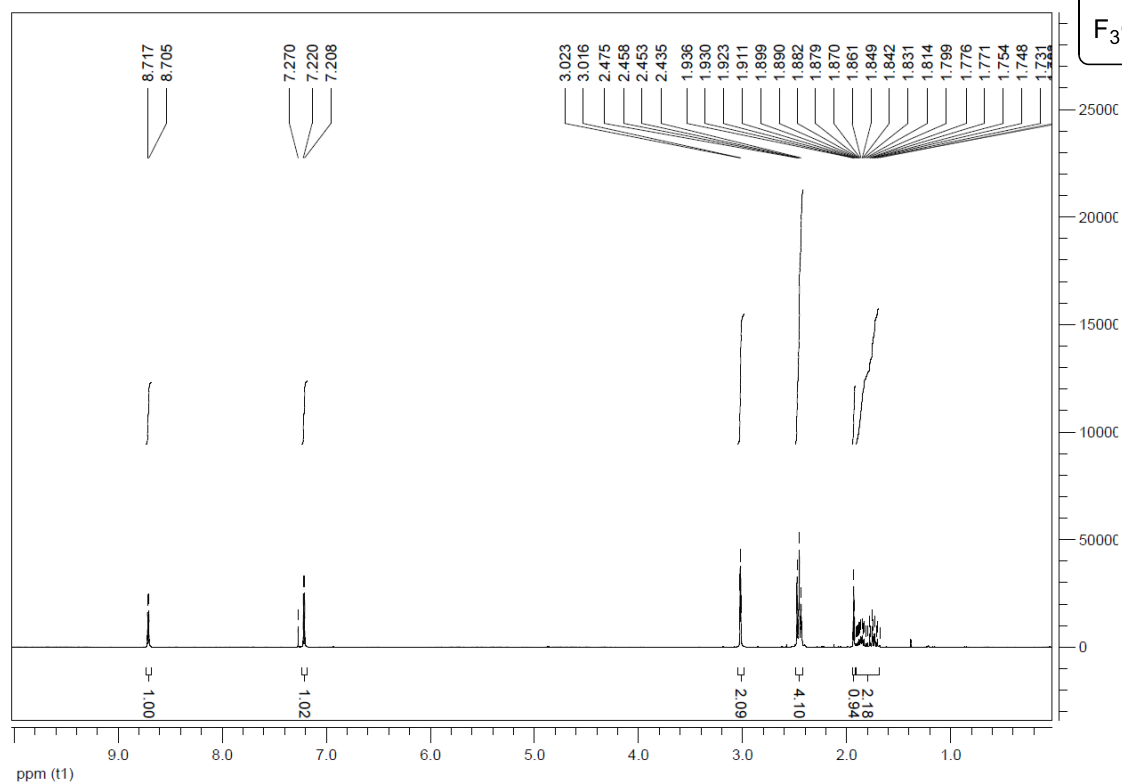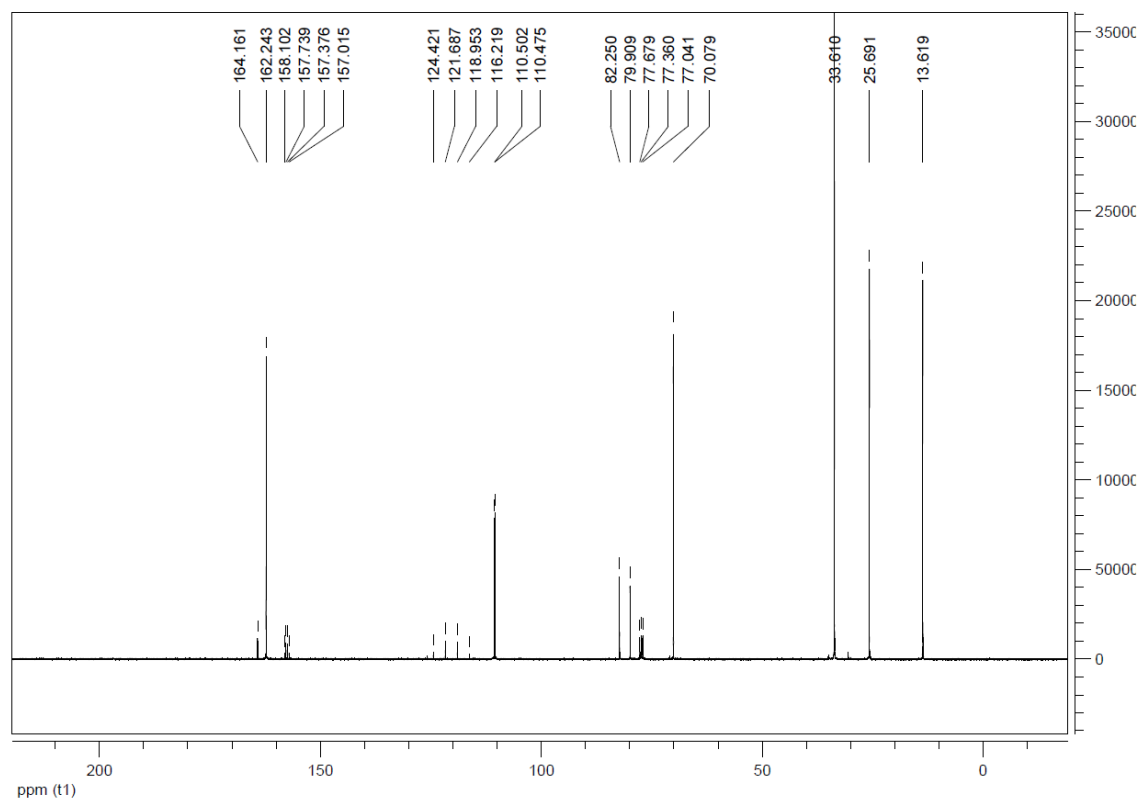

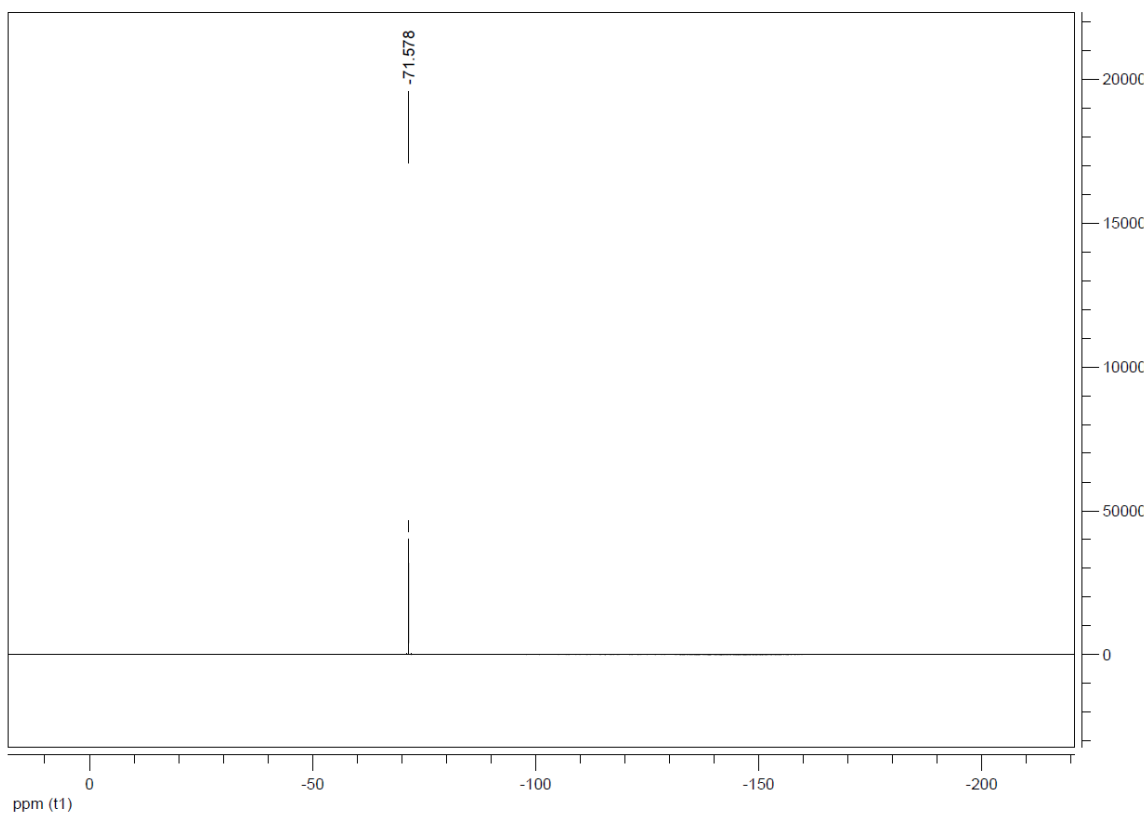

2-(1-(Prop-2-ynyl)cyclohexyloxy)-4-(trifluoromethyl)pyrimidine (2s)

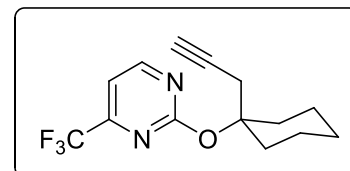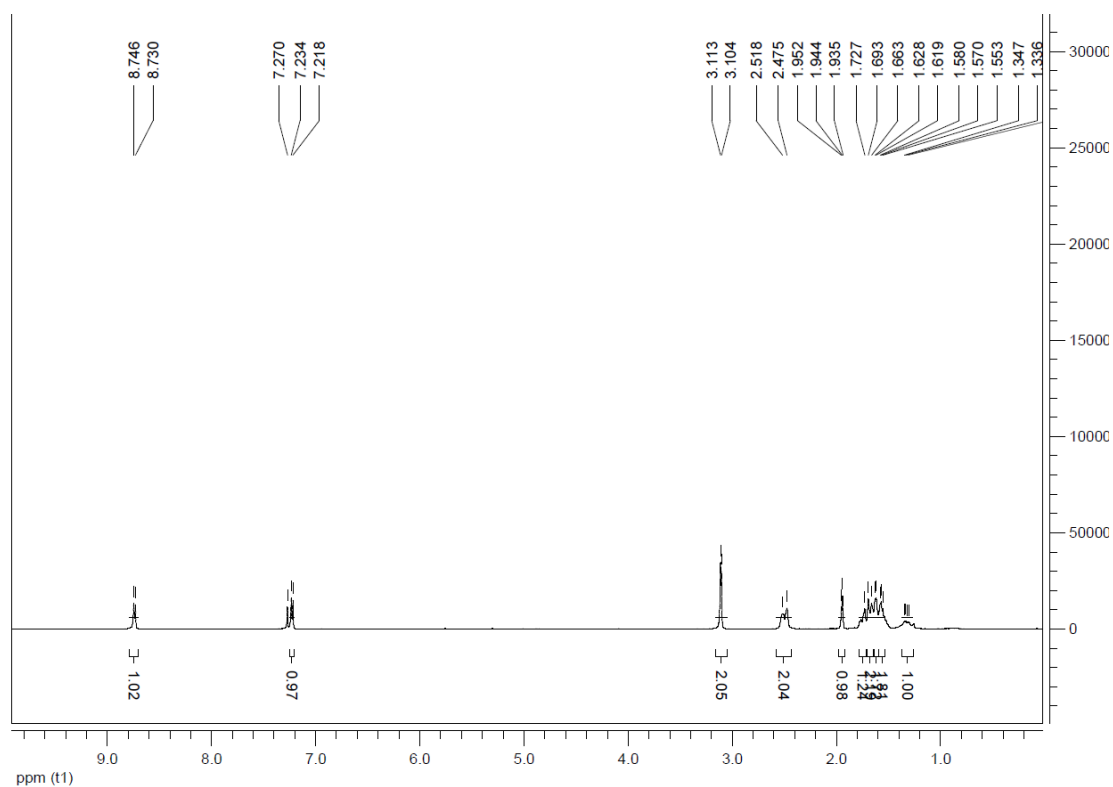

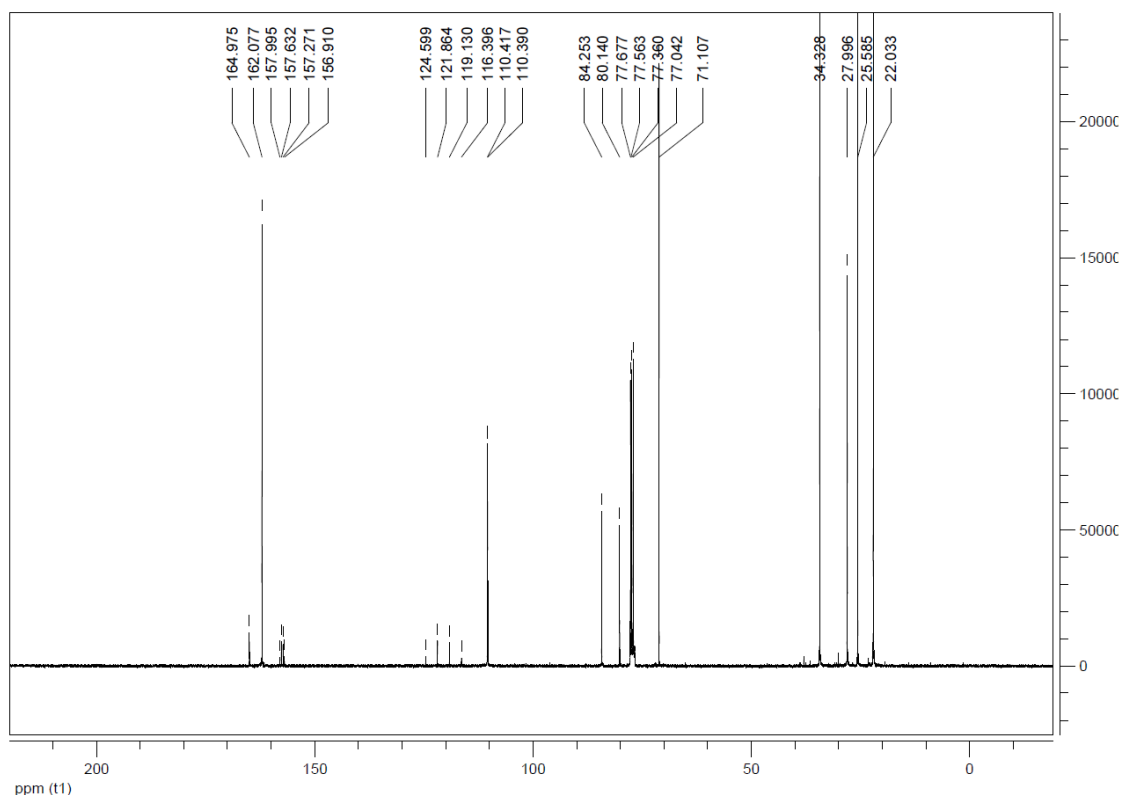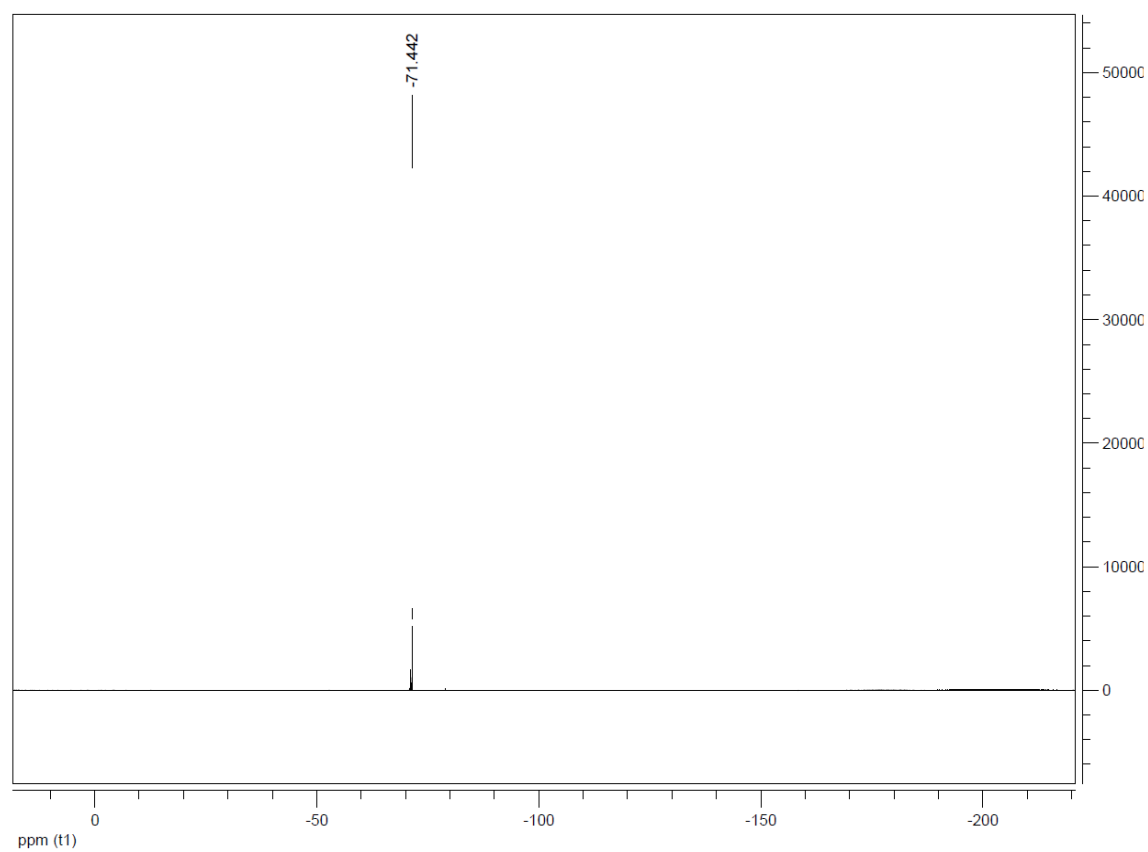

2-(but-3-ynylthio)-4-(trifluoromethyl)pyrimidine (**2v**)

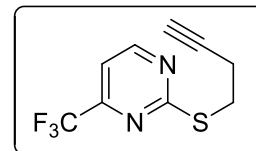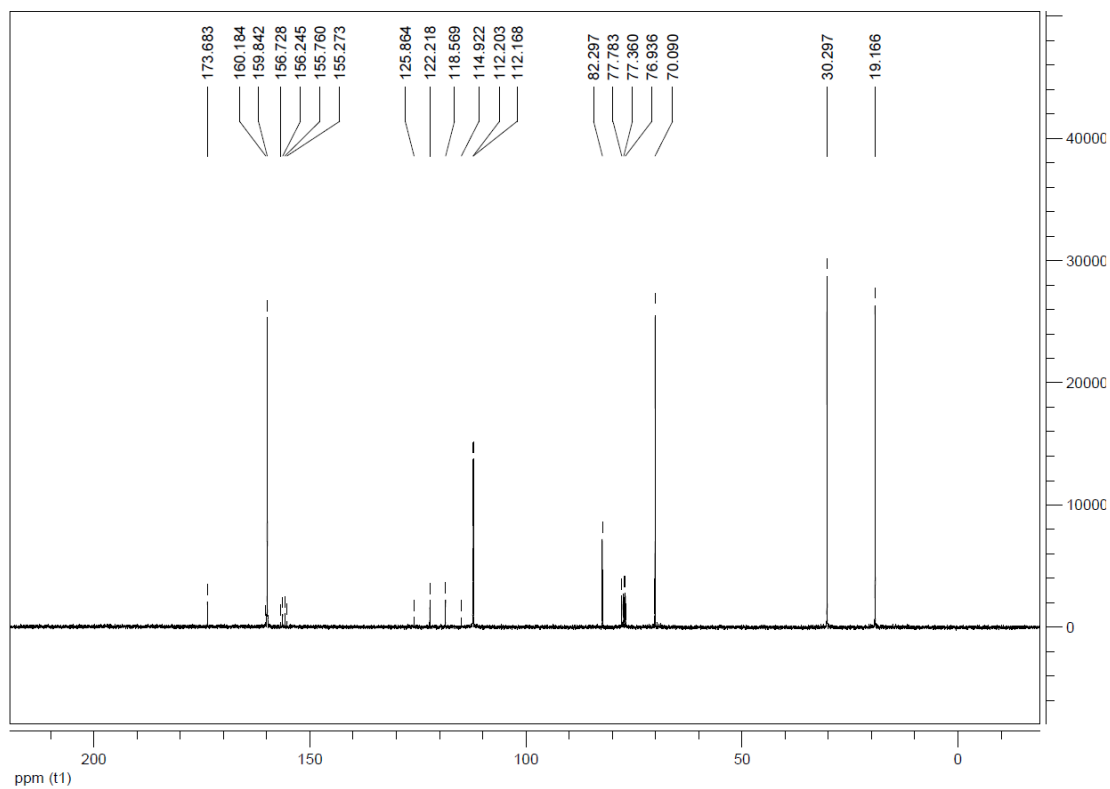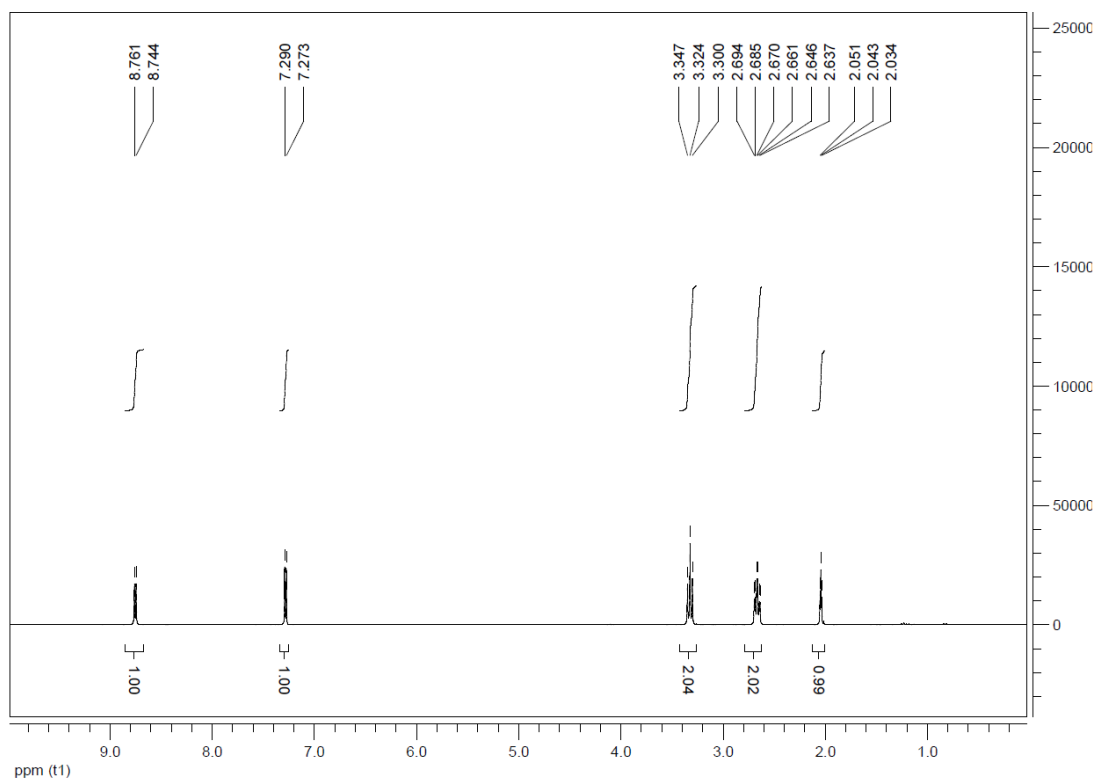

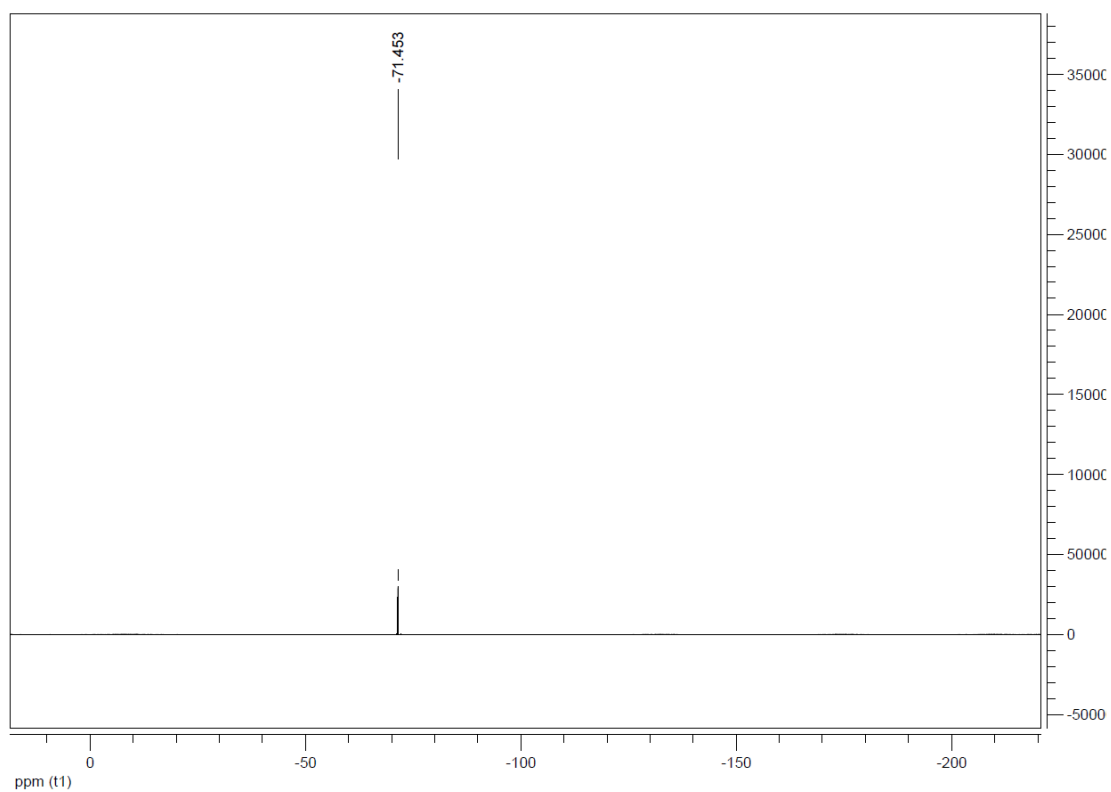

N-(but-3-ynyl)-N-(4-(trifluoromethyl)pyrimidin-2-yl)acetamide (4w)

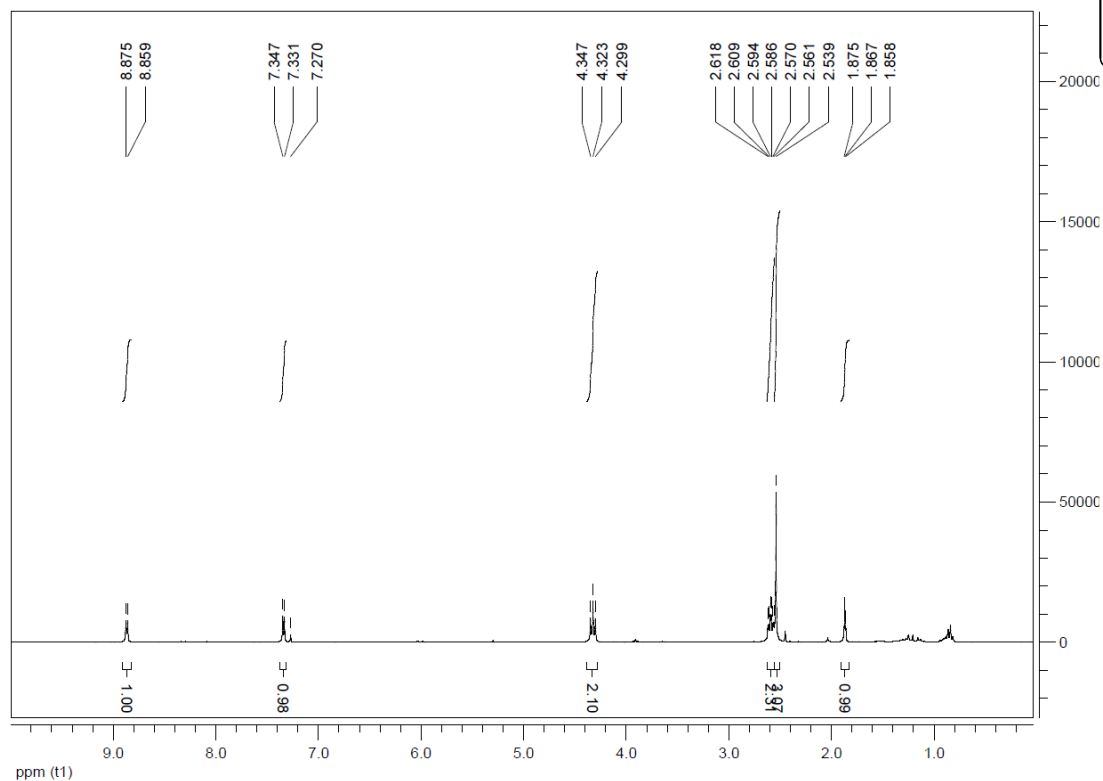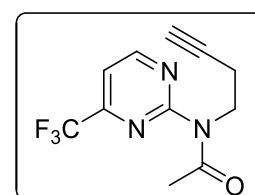

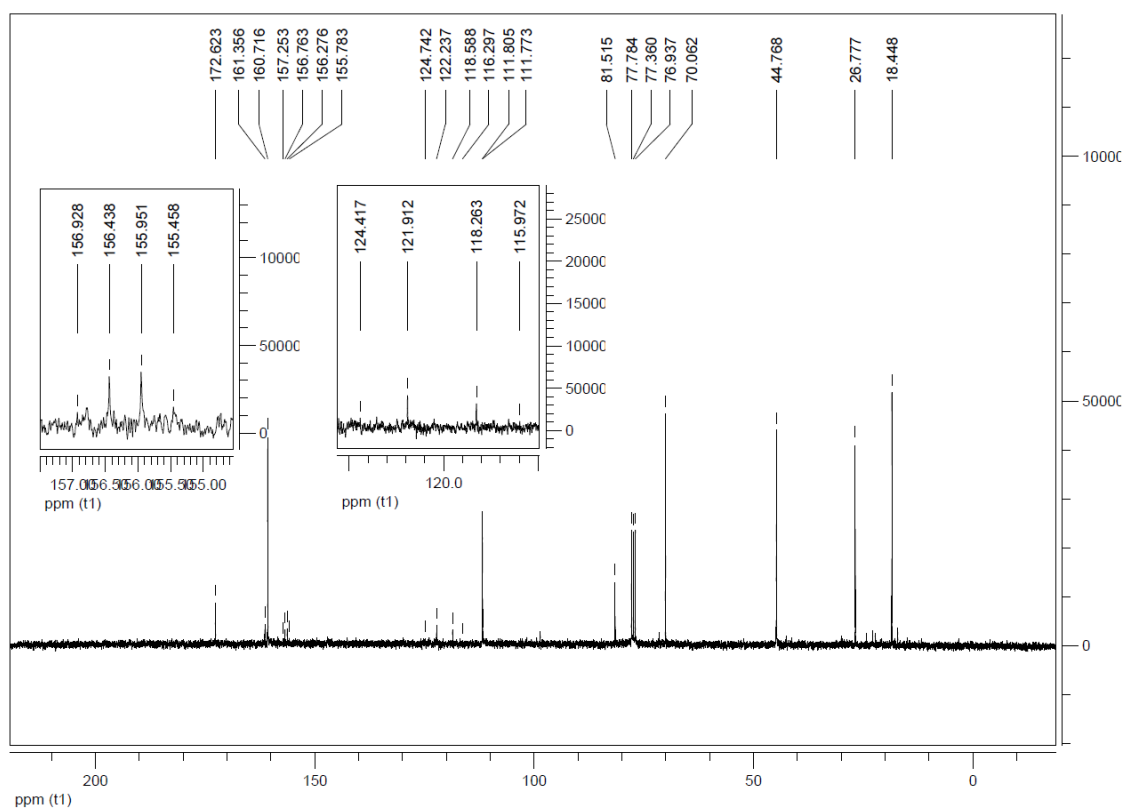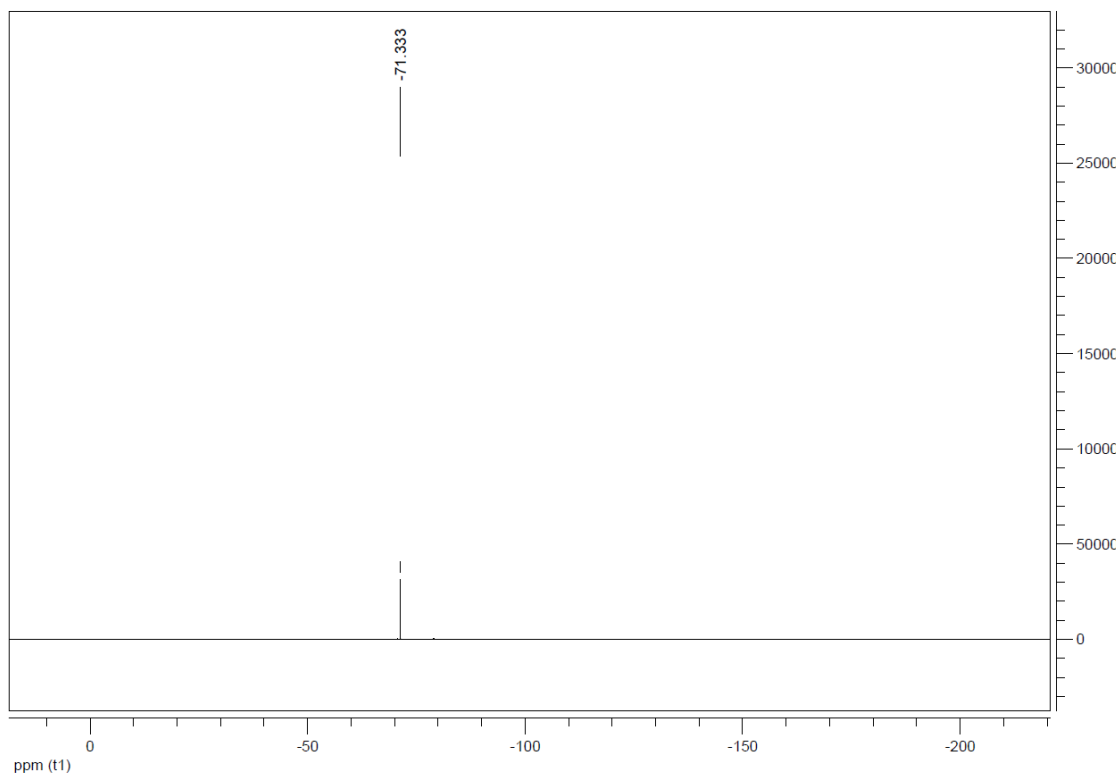

3-(4-(4-(Trifluoromethyl)pyrimidin-2-yloxy)but-1-ynyl)oxazolidin-2-one (**3a**)

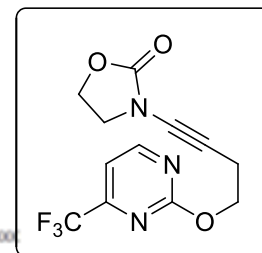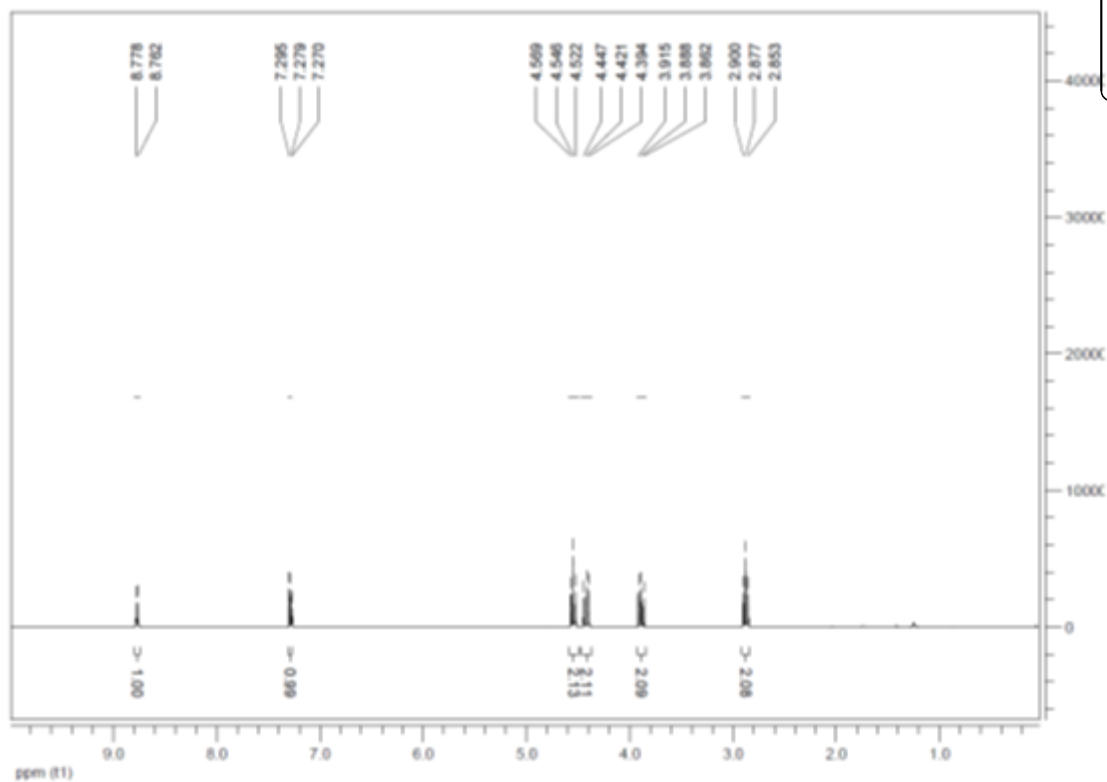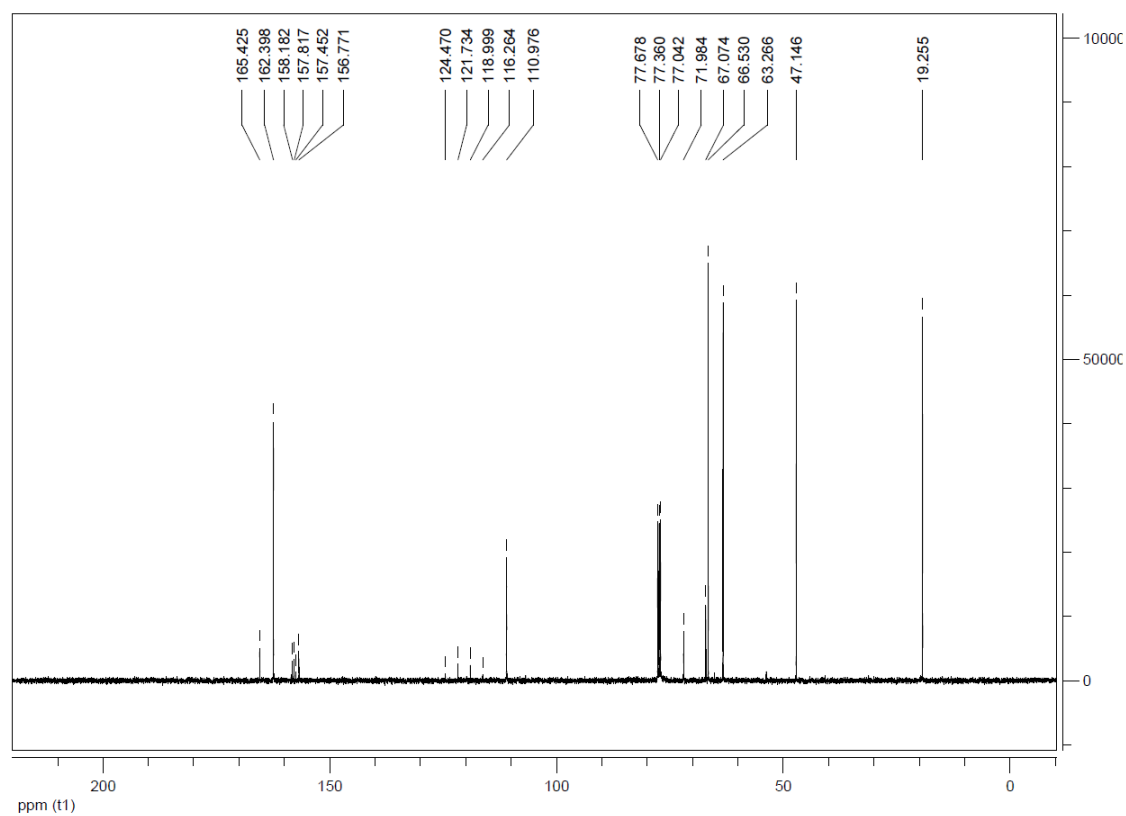

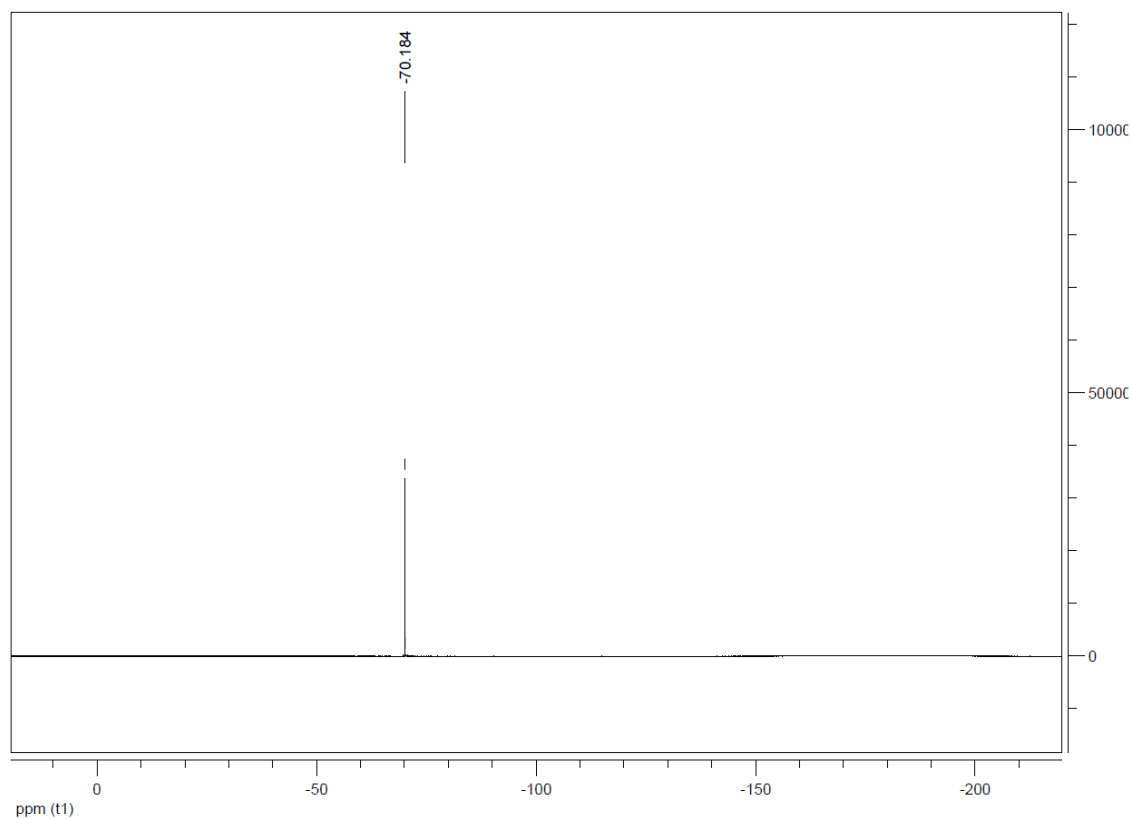

*N*-Methyl-*N*-(4-(4-(trifluoromethyl)pyrimidin-2-yloxy)but-1-ynyl)methanesulfonamide (**3b**)

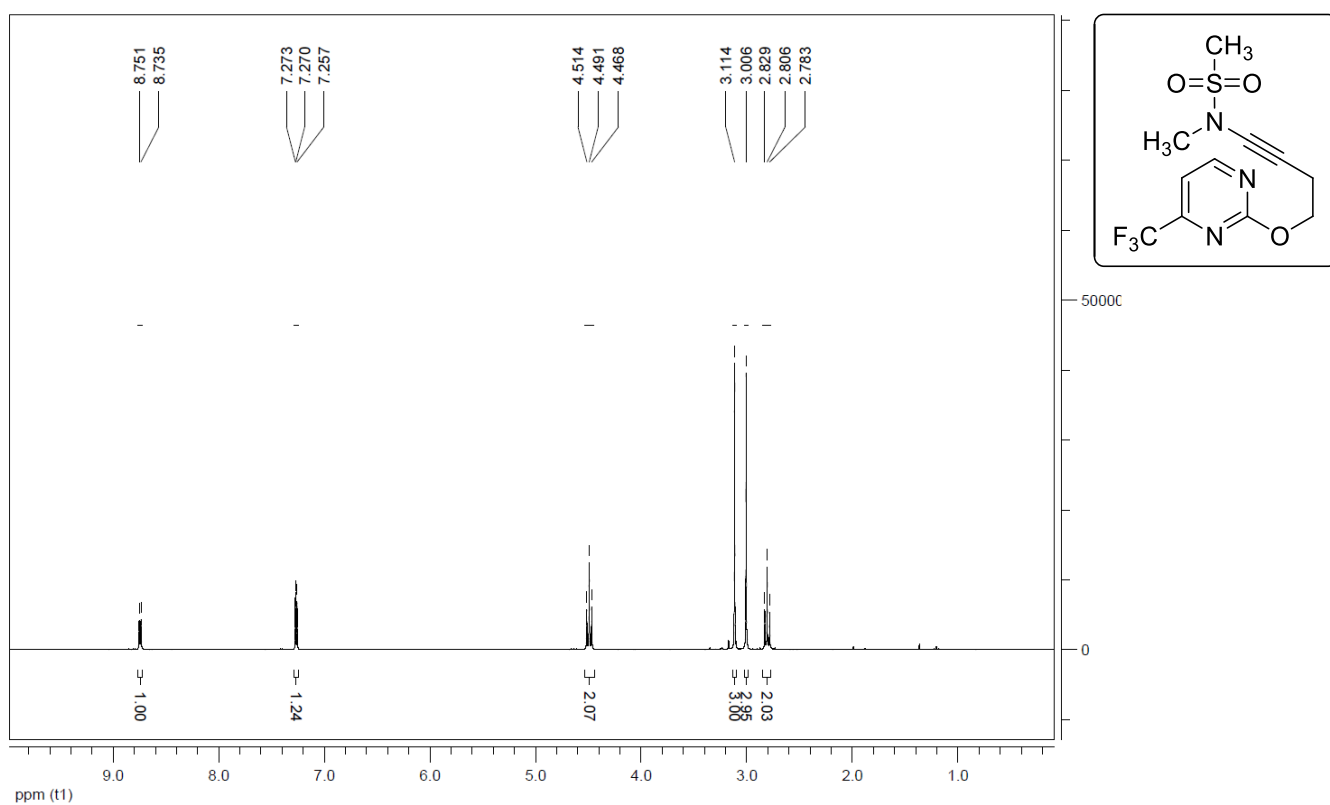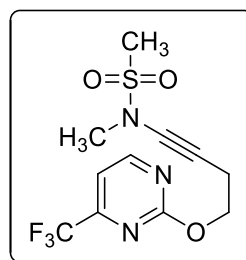



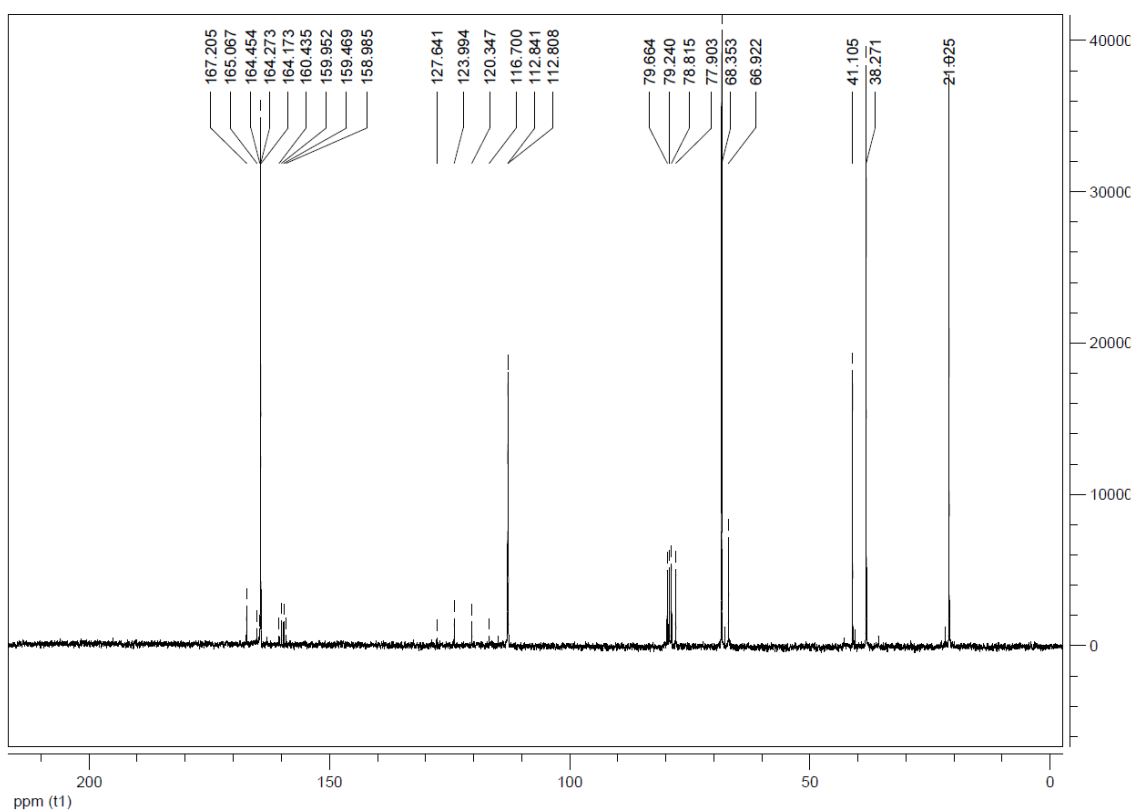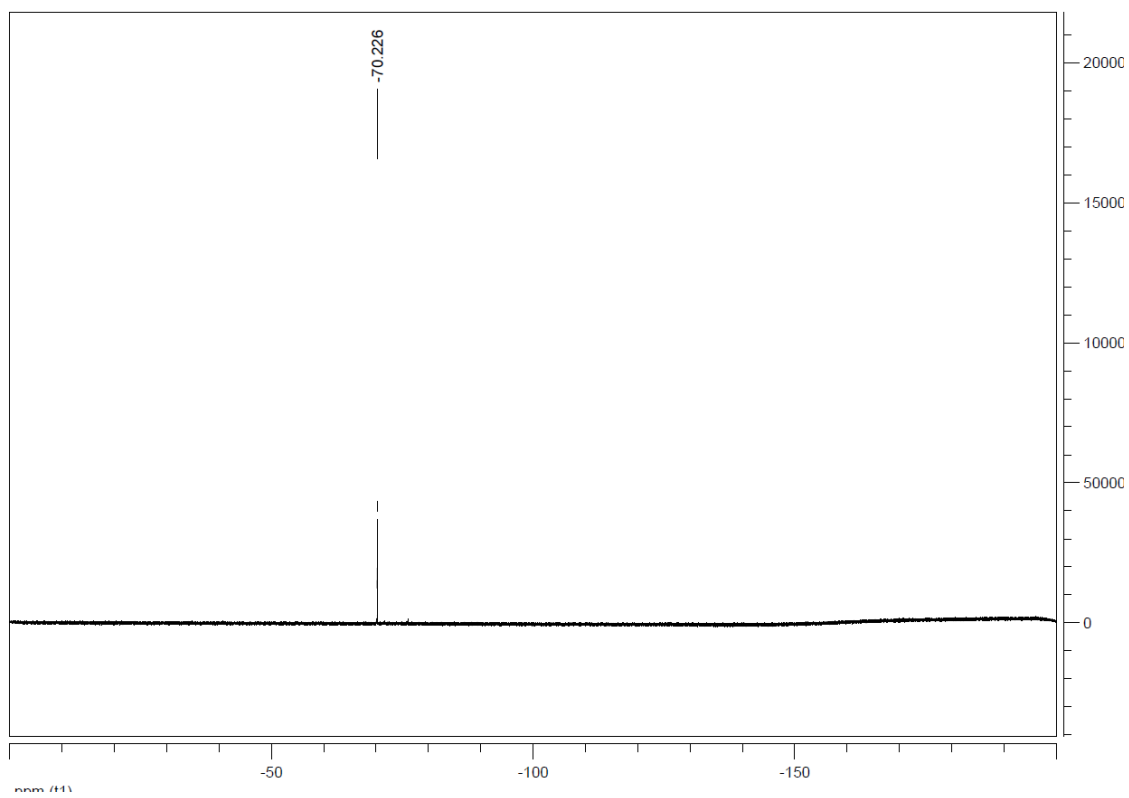

2-(4-{[4-(Trifluoromethyl)pyrimidin-2-yl]oxy}but-1-yn-1-yl)-1,2-thiazolidine-1,1-dione (**3c**)

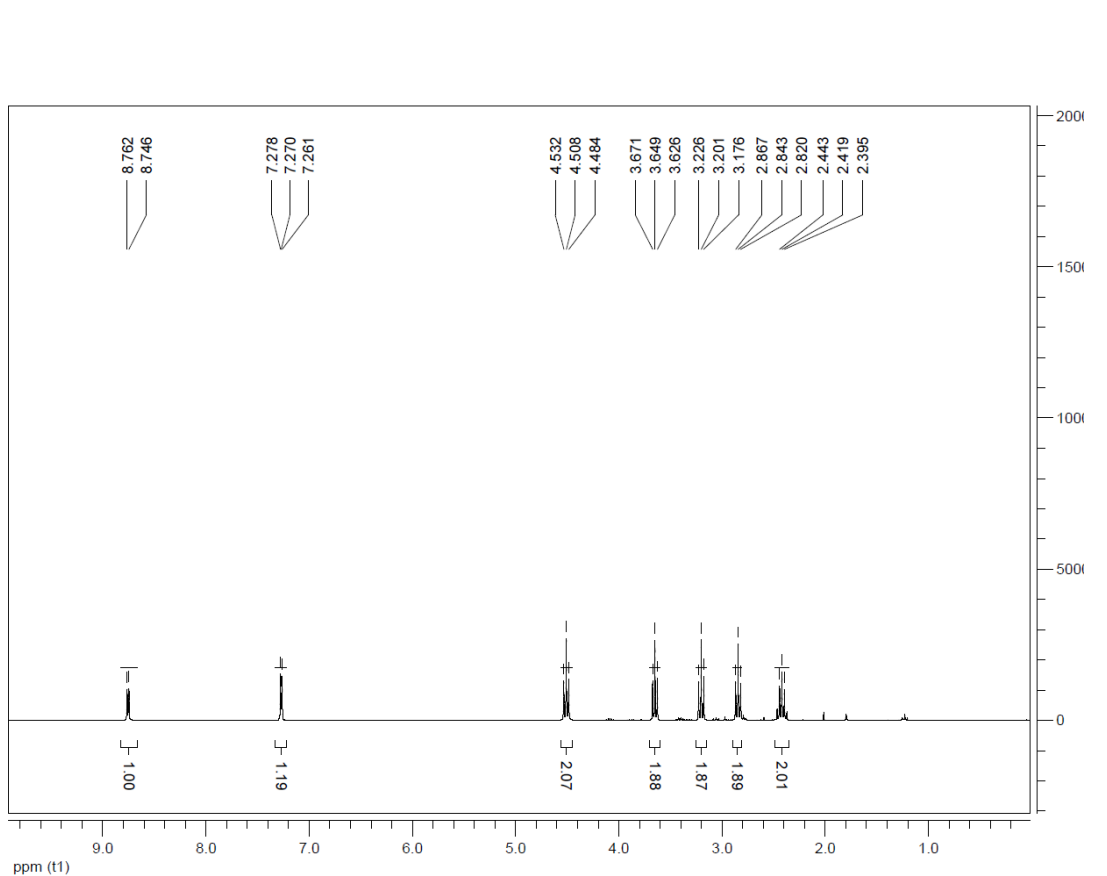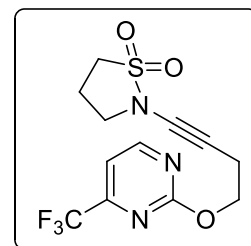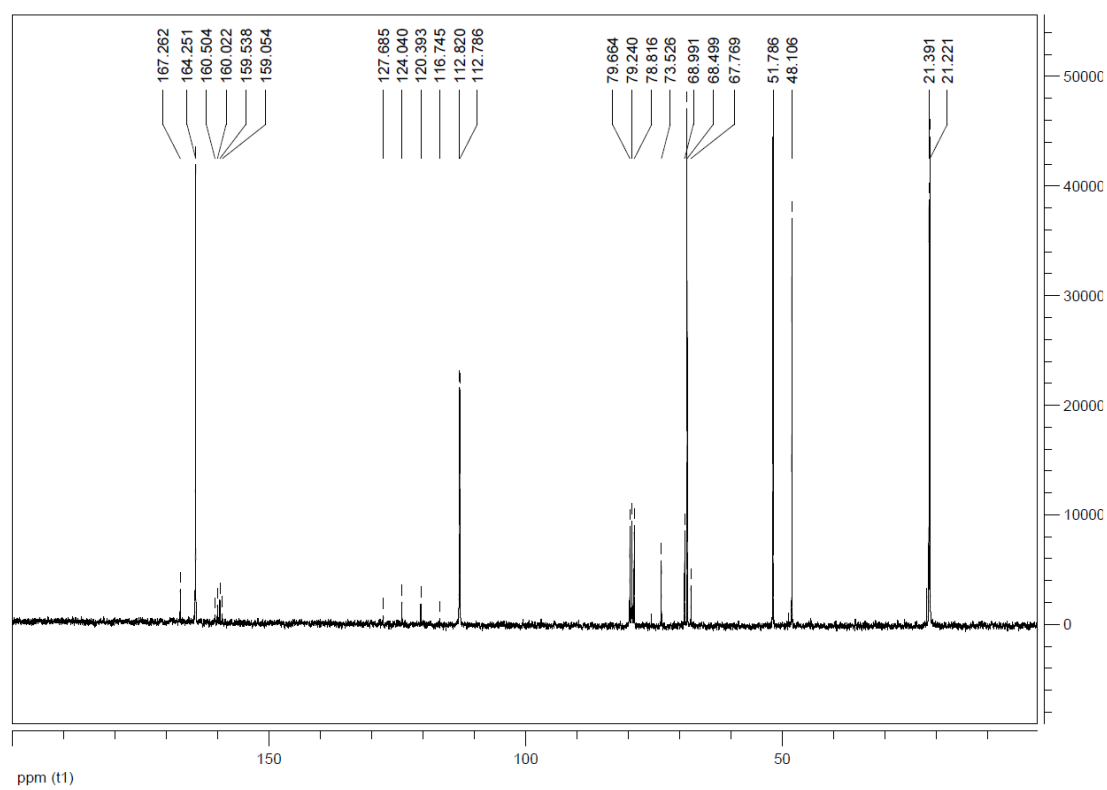

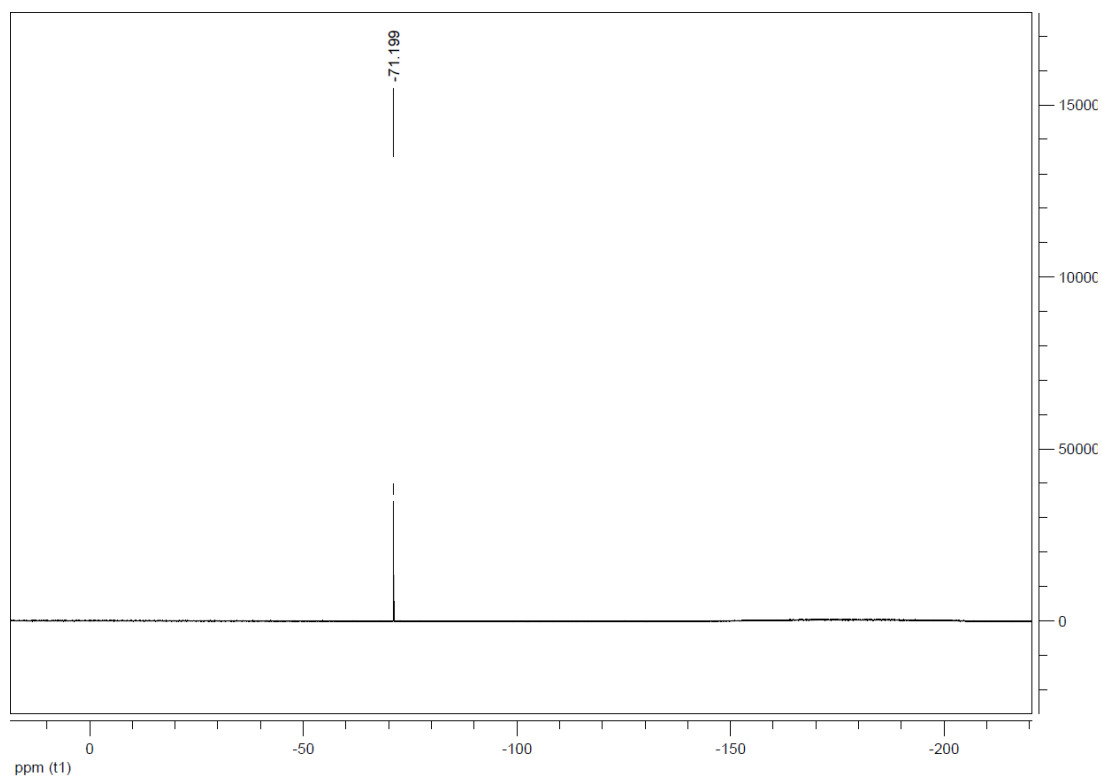

1-(4-(4-(Trifluoromethyl)pyrimidin-2-yloxy)but-1-ynyl)azetidin-2-one (**3d**)

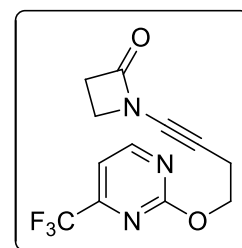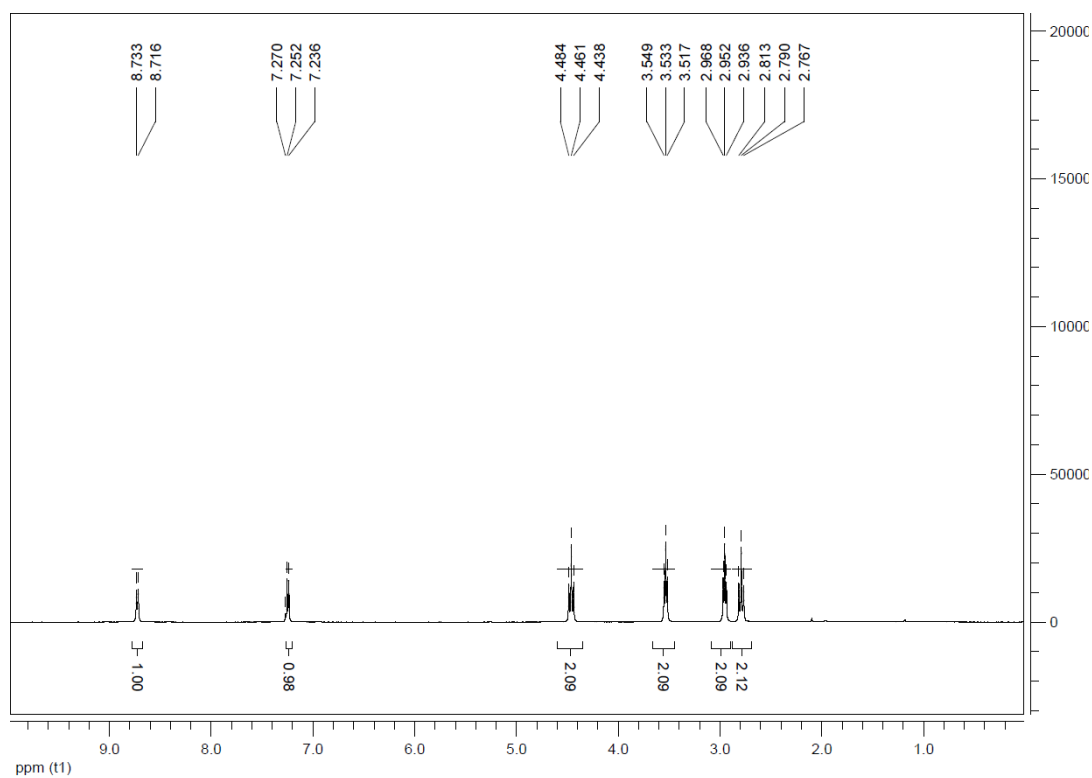

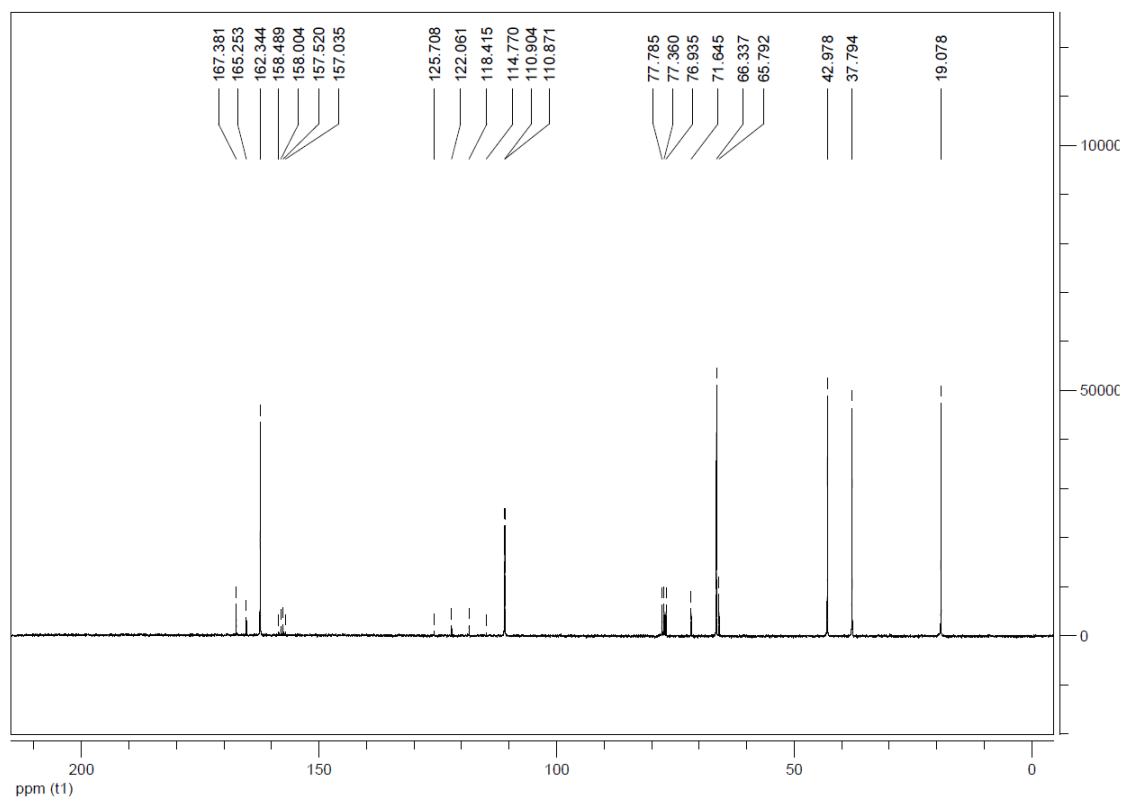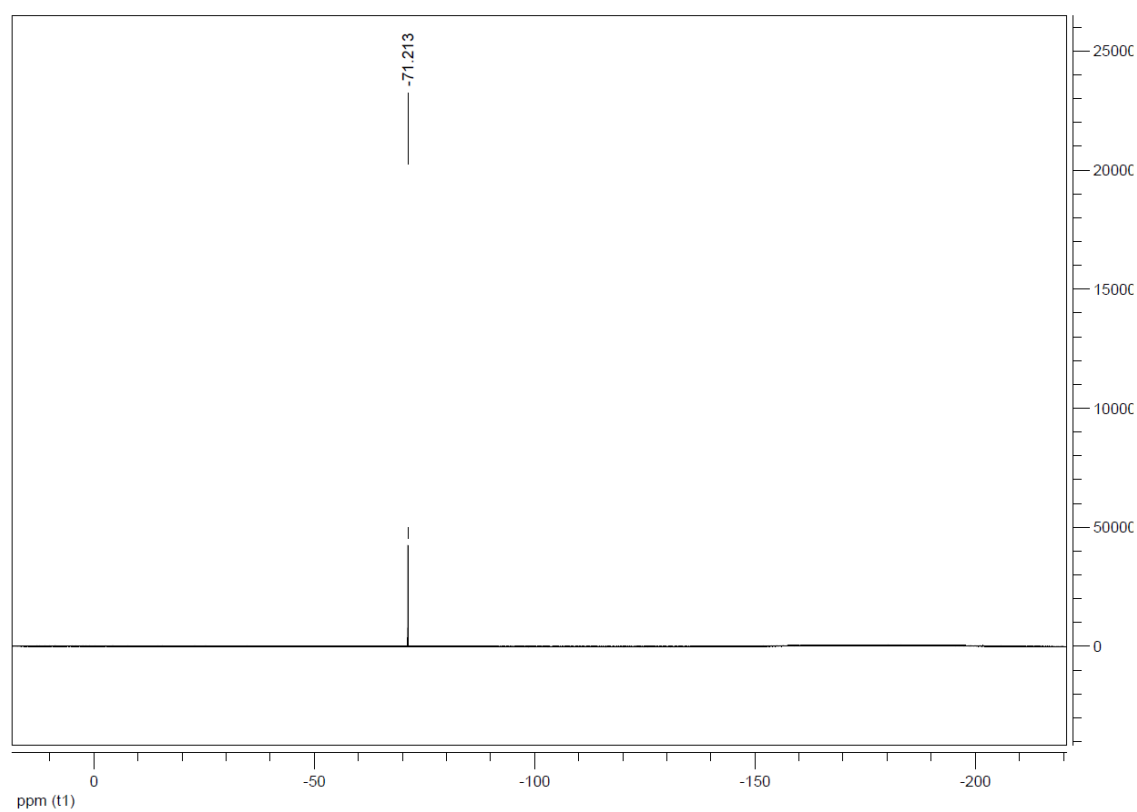

Methyl 1-(4-(4-(trifluoromethyl)pyrimidin-2-yloxy)but-1-ynyl)-1H-indole-3-carboxylate (**3e**)

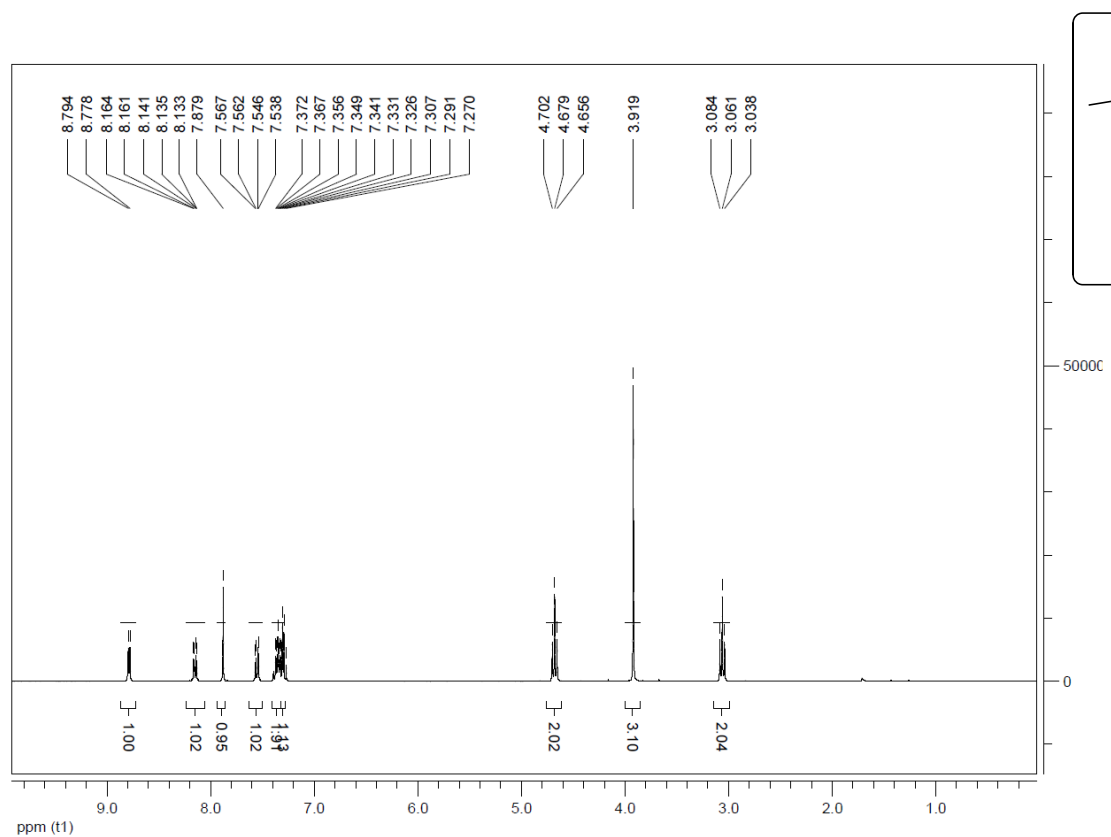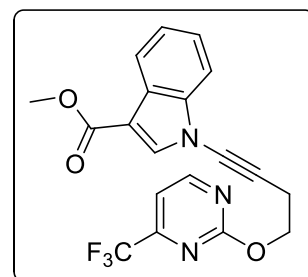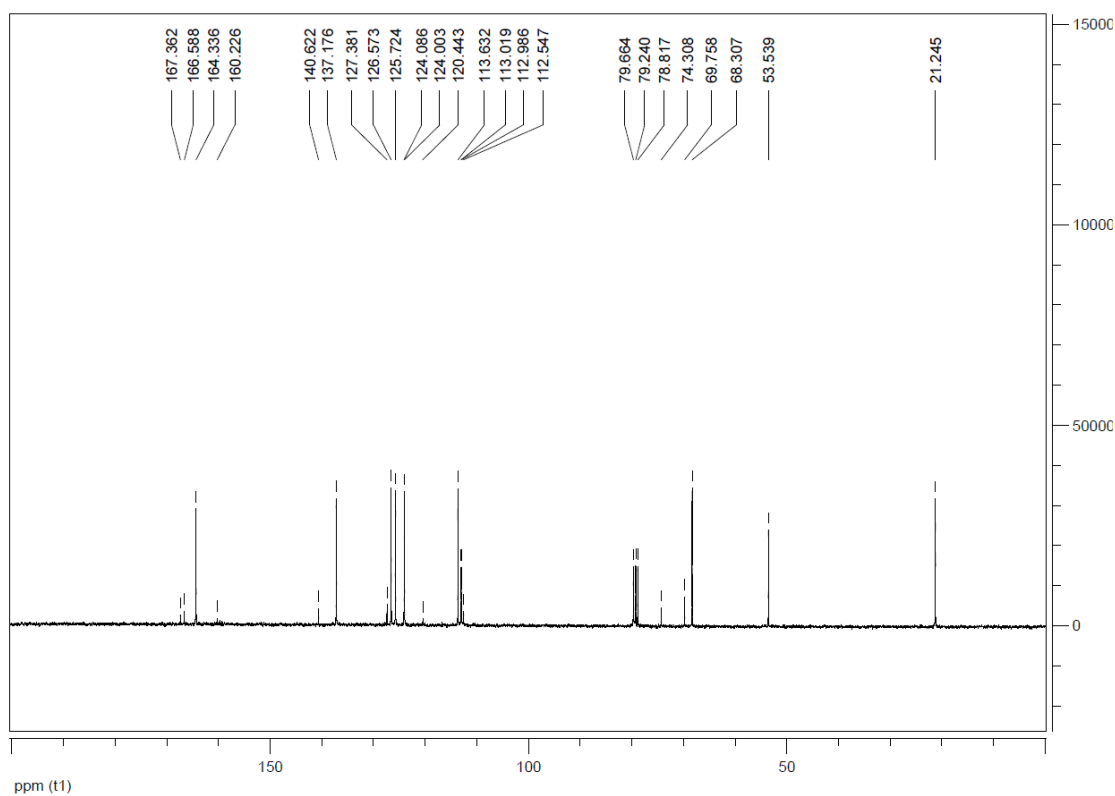

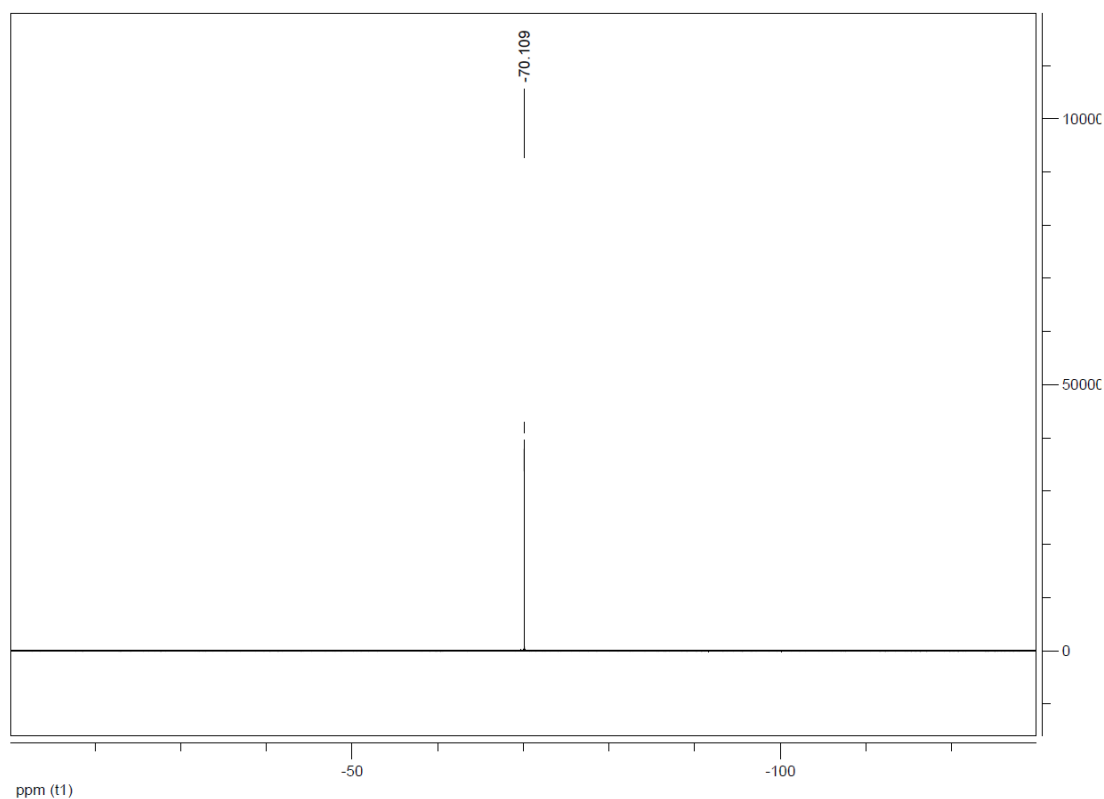

3-(4-(5-Fluoropyrimidin-2-yloxy)but-1-ynyl)oxazolidin-2-one (**3f**)

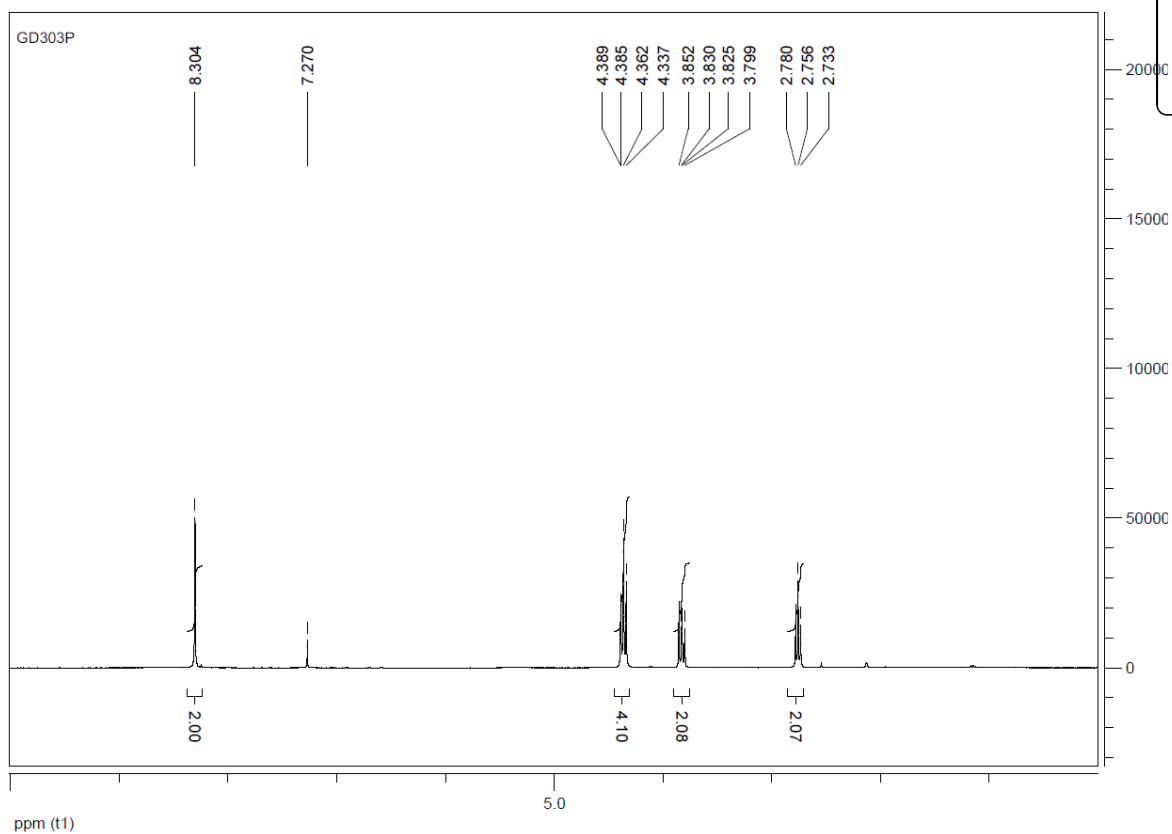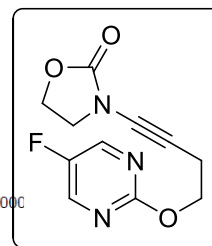

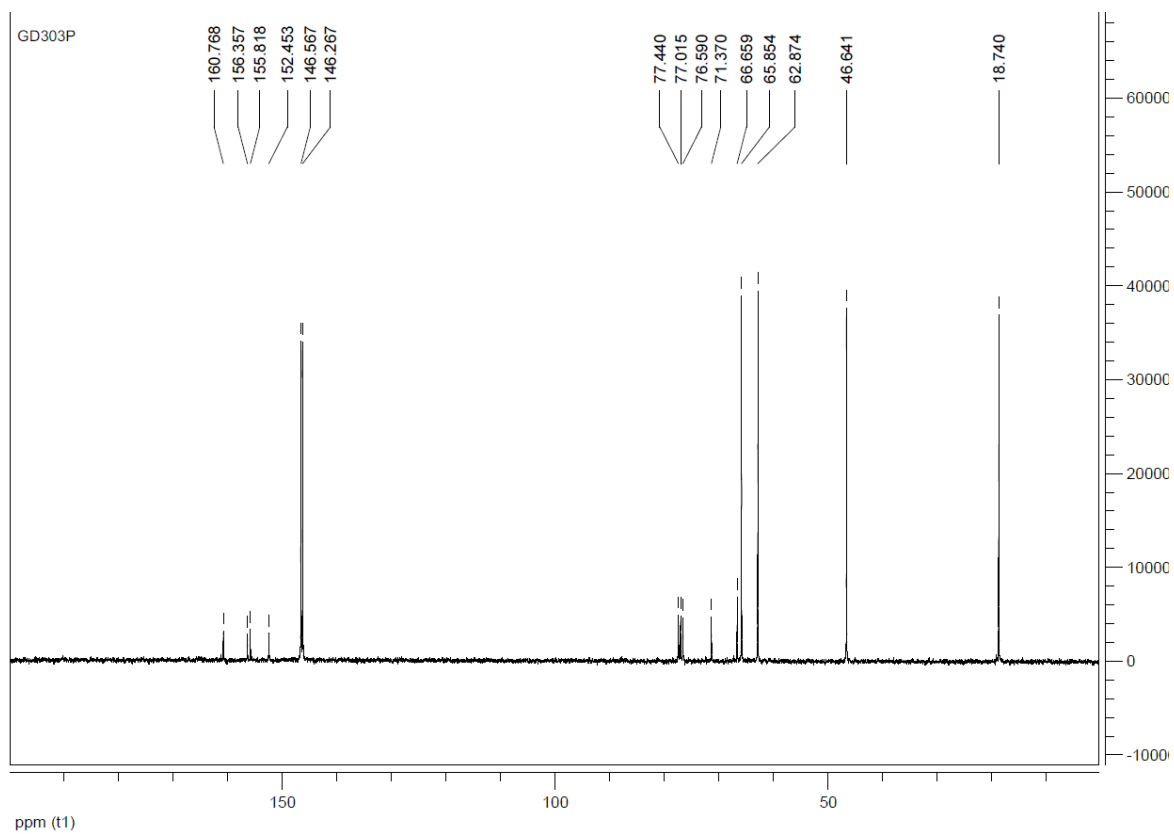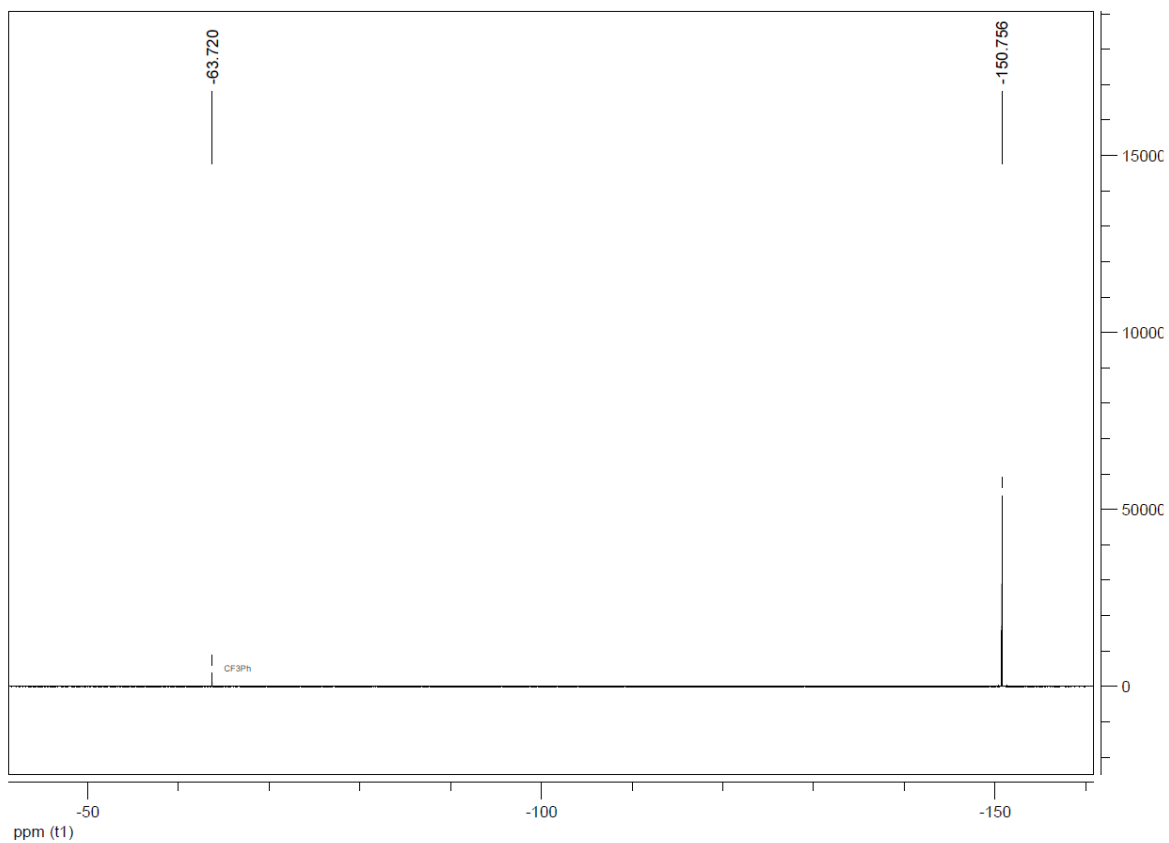

1-(4-(5-Fluoropyrimidin-2-yloxy)but-1-ynyl)azetidin-2-one (**3g**)

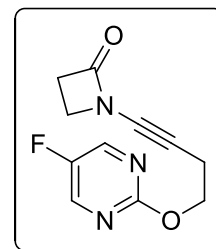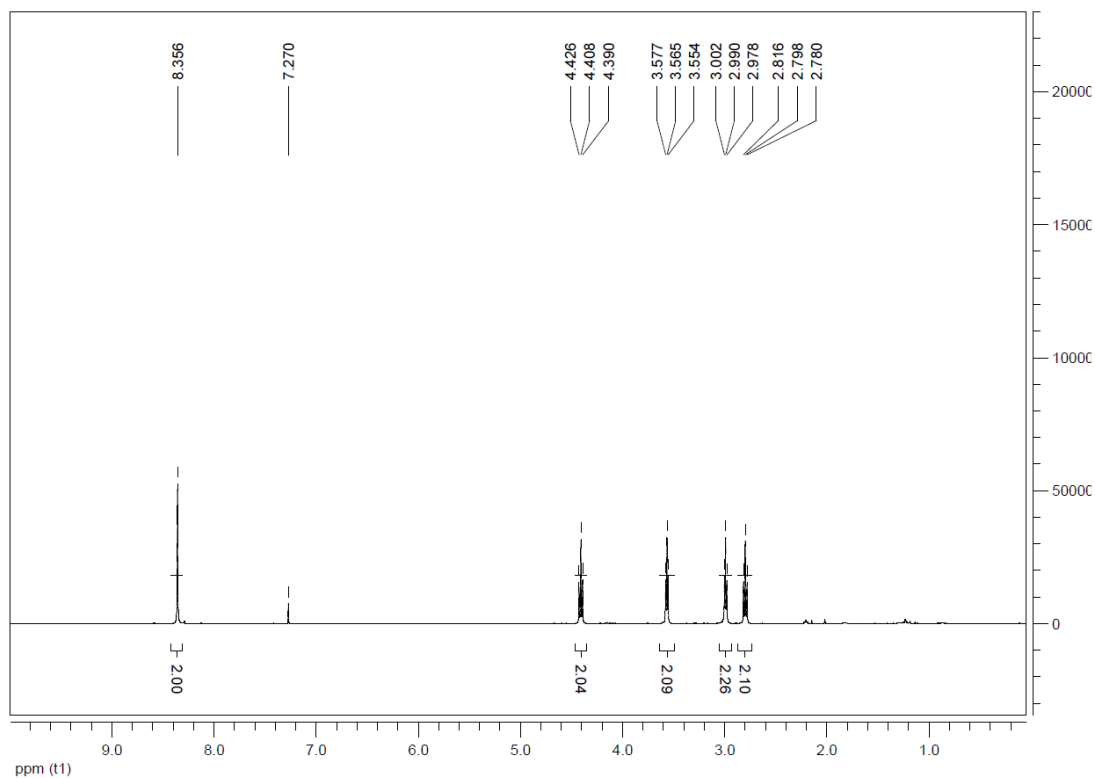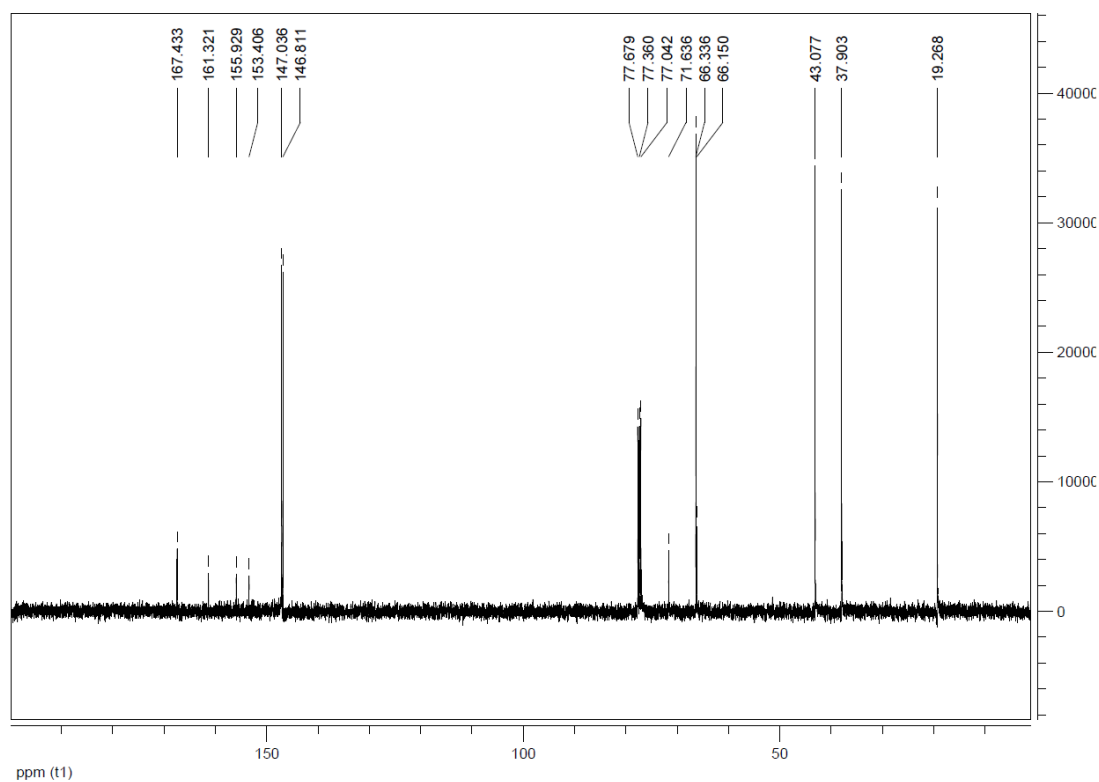



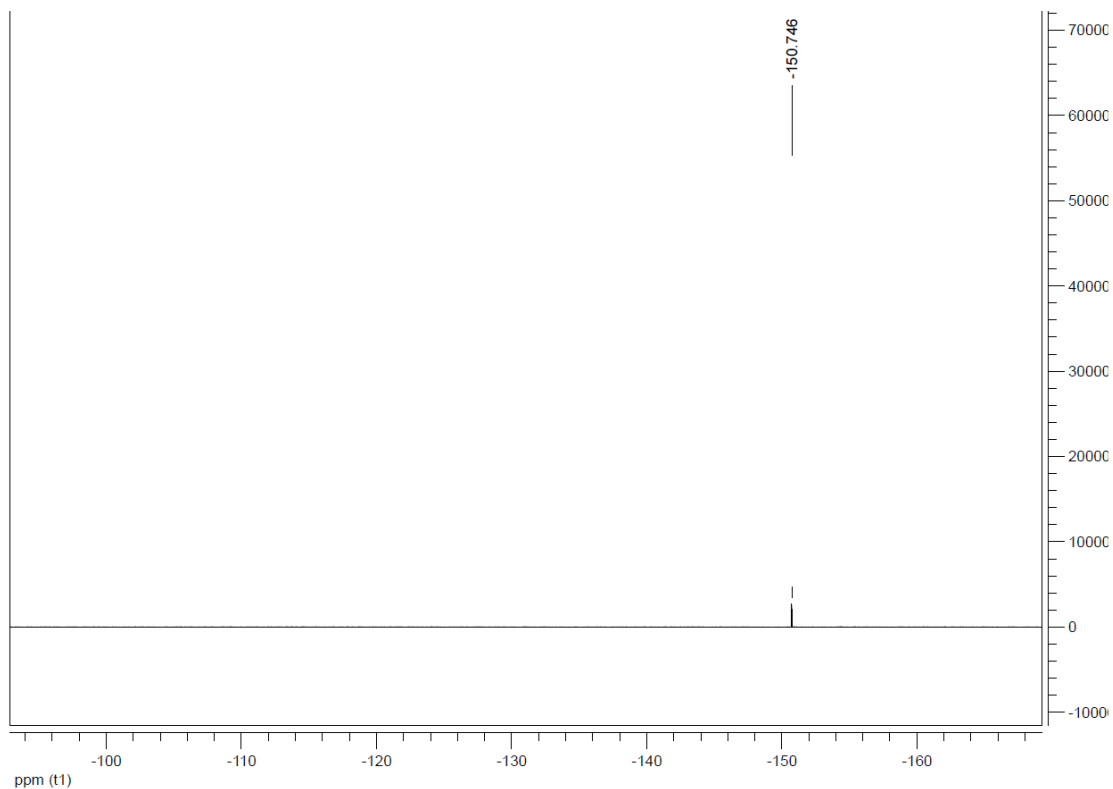

Methyl 1-(4-(5-fluoropyrimidin-2-yloxy)but-1-ynyl)-1H-indole-3-carboxylate (**3h**)

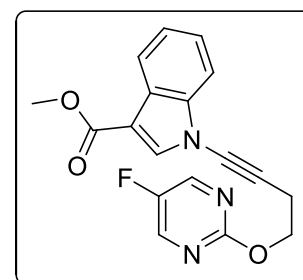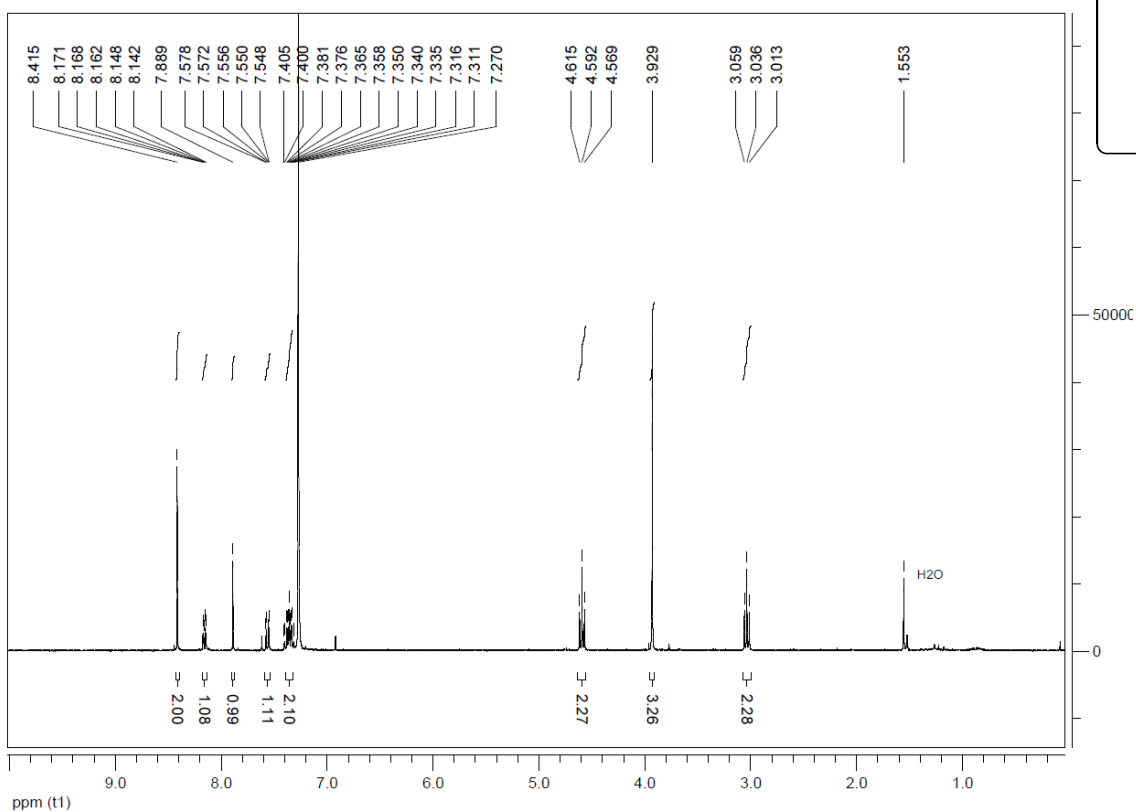

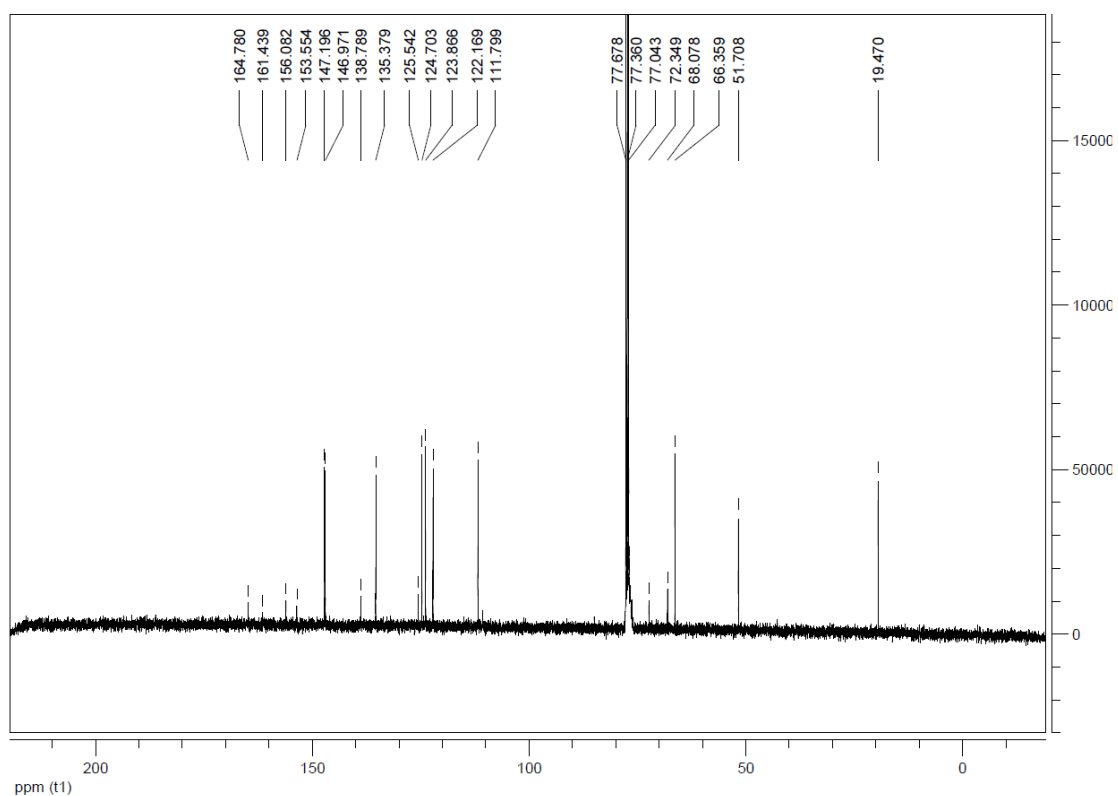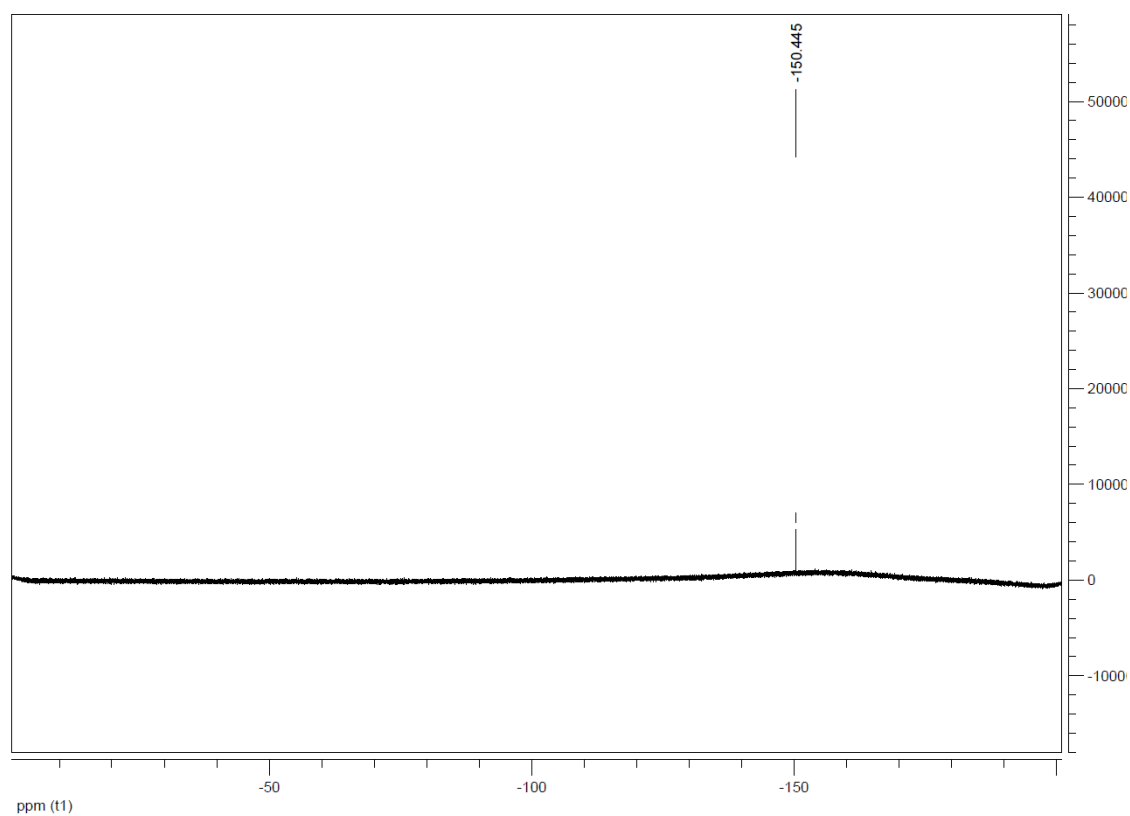

3-(4-(5-Chloropyrimidin-2-yloxy)but-1-ynyl)oxazolidin-2-one (**3i**)

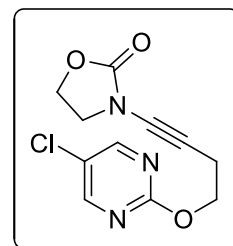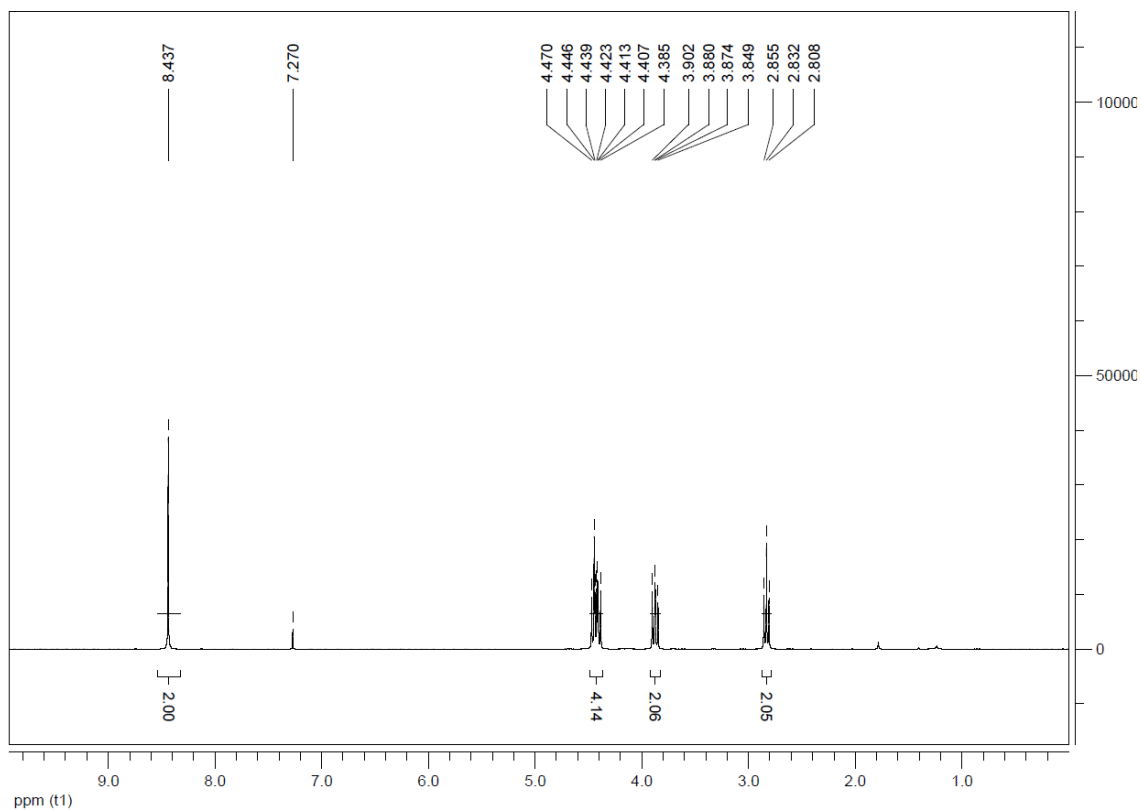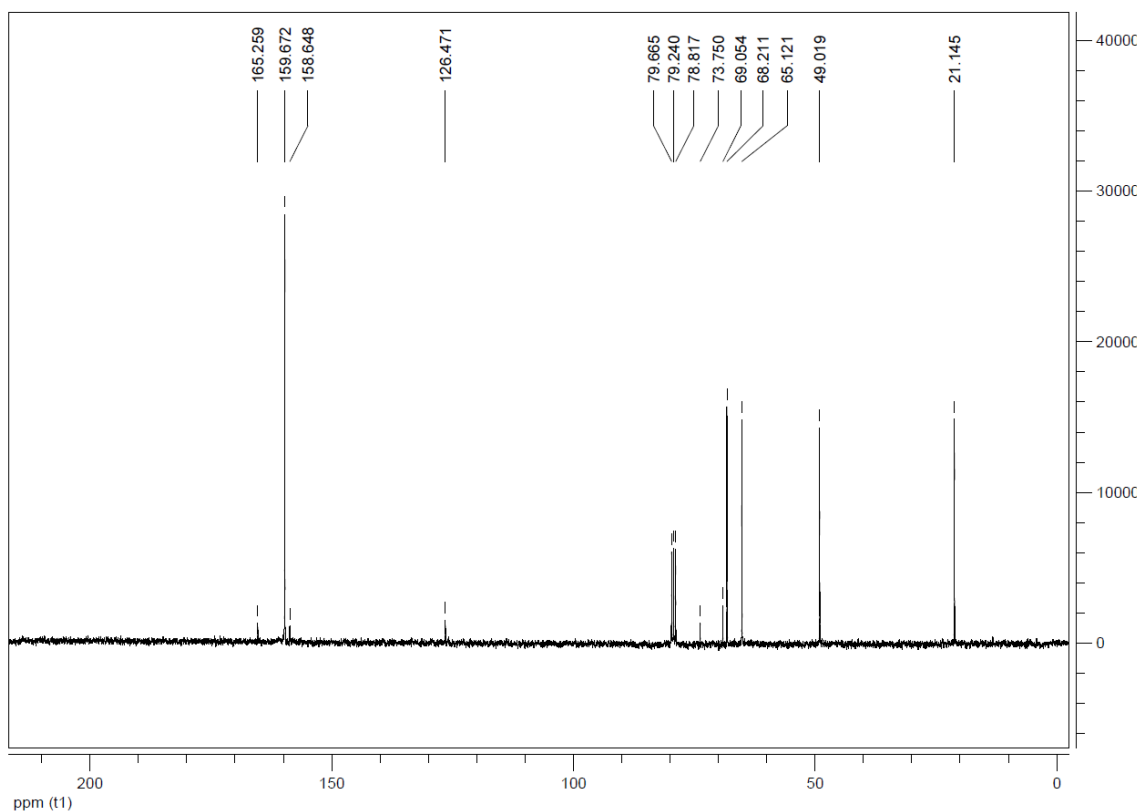

3-(4-(5-(Trifluoromethyl)pyrimidin-2-yloxy)but-1-ynyl)oxazolidin-2-one (**3j**)

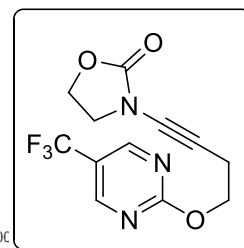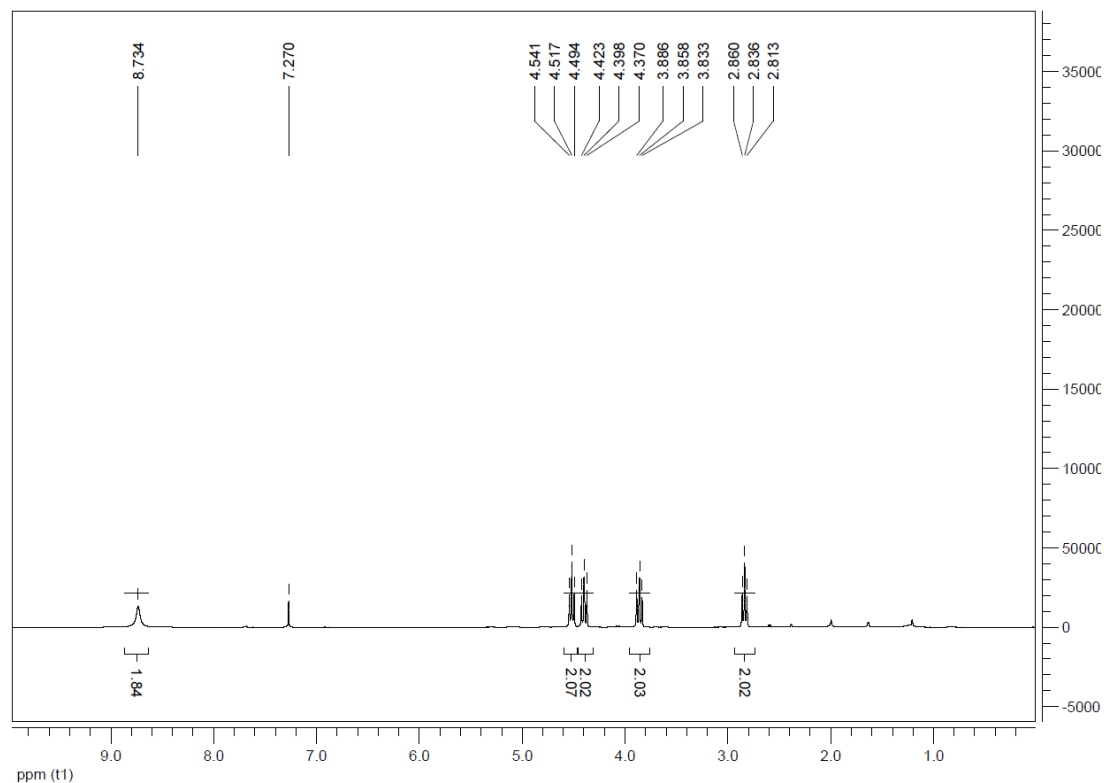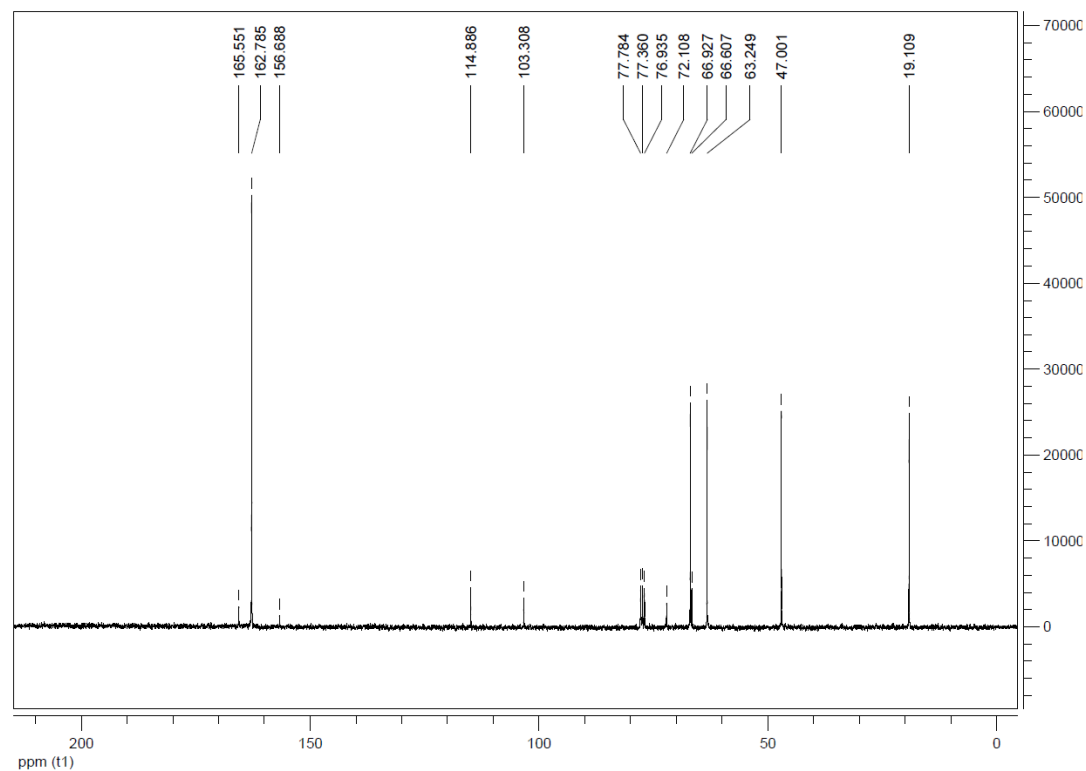

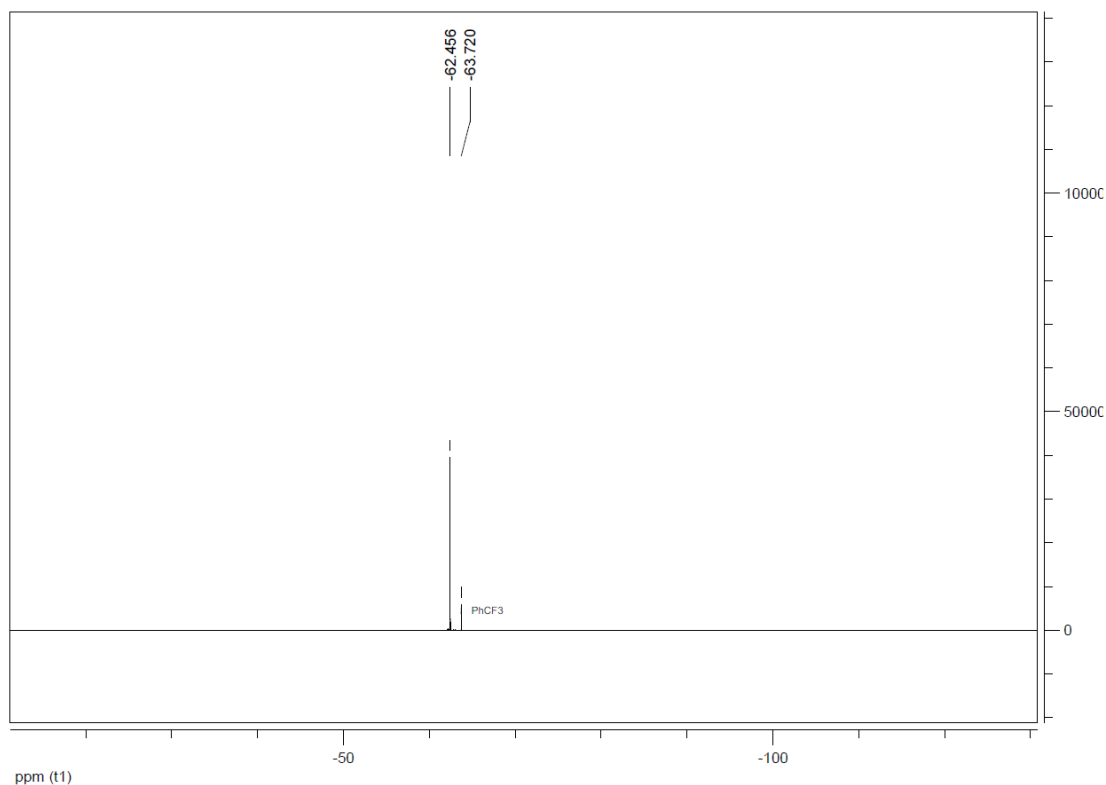

3-(4-(5-Fluoro-4-(thiophen-3-yl)pyrimidin-2-yloxy)but-1-ynyl)oxazolidin-2-one (**3k**)

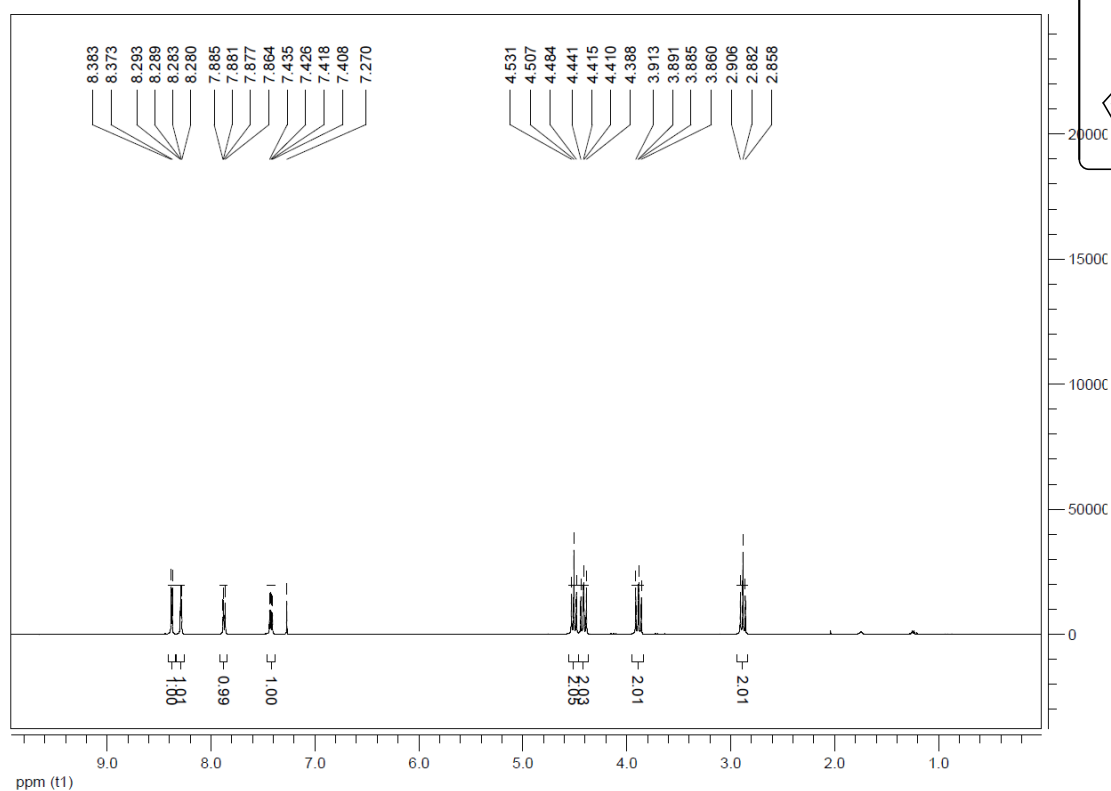

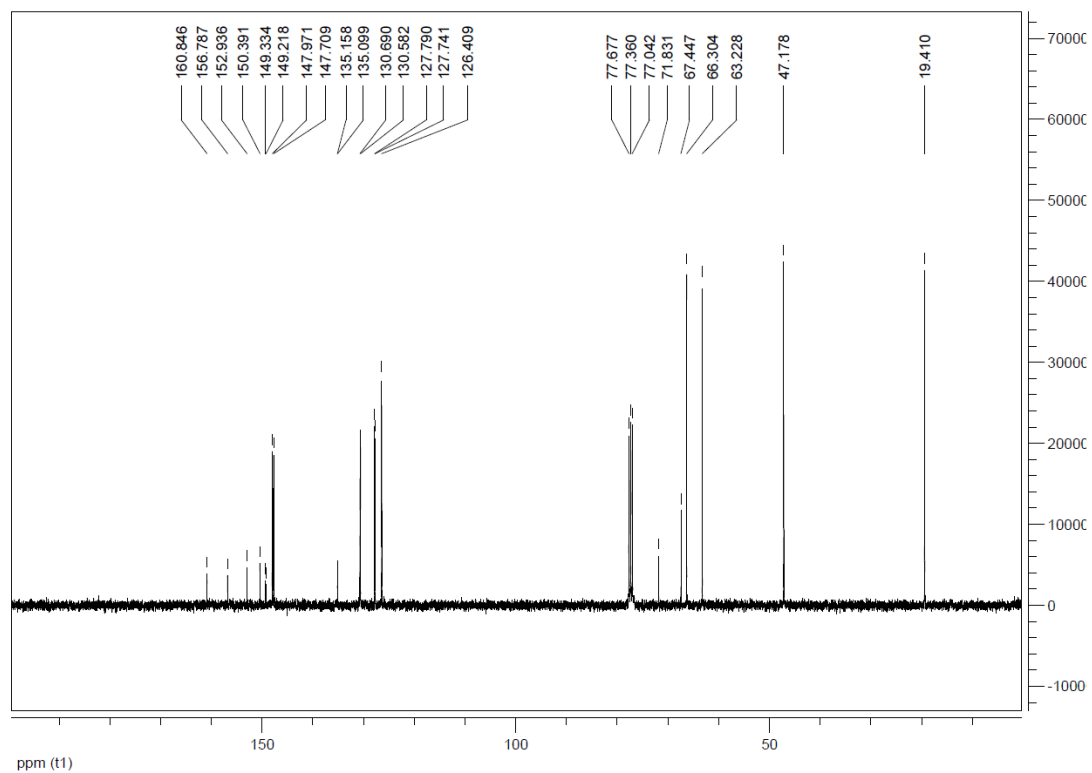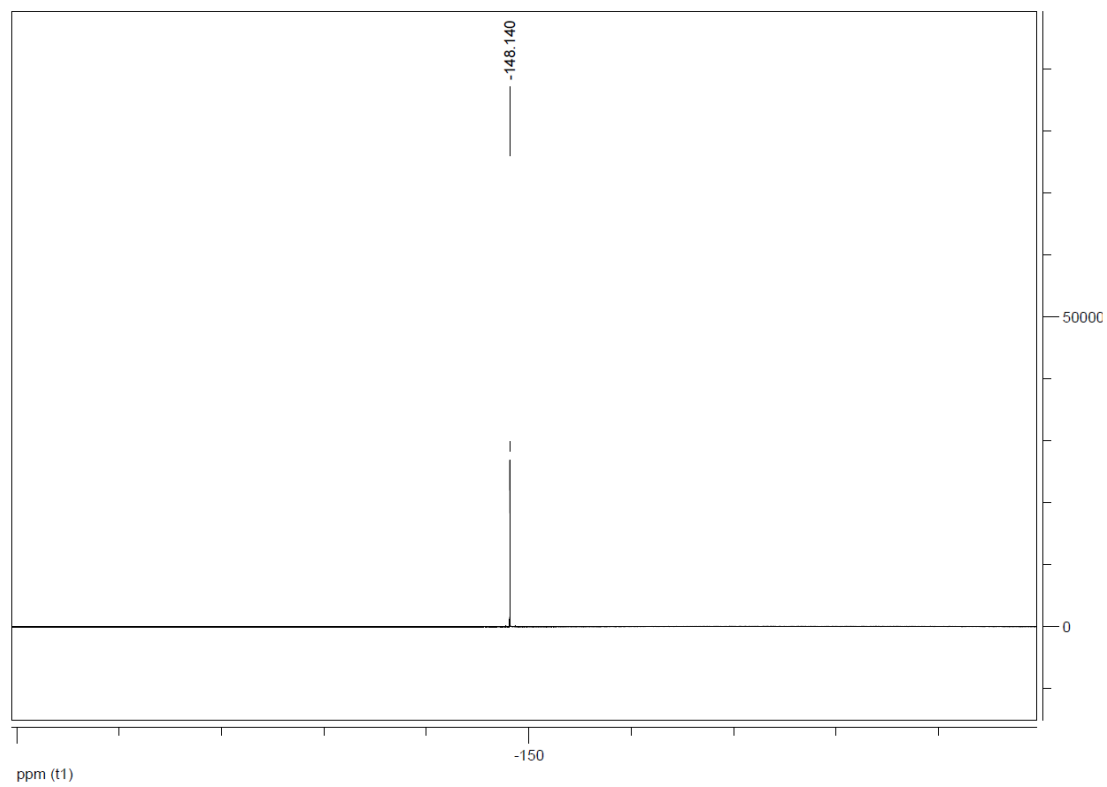

3-(4-(5-Fluoro-4-phenylpyrimidin-2-yloxy)but-1-ynyl)oxazolidin-2-one (**3I**)

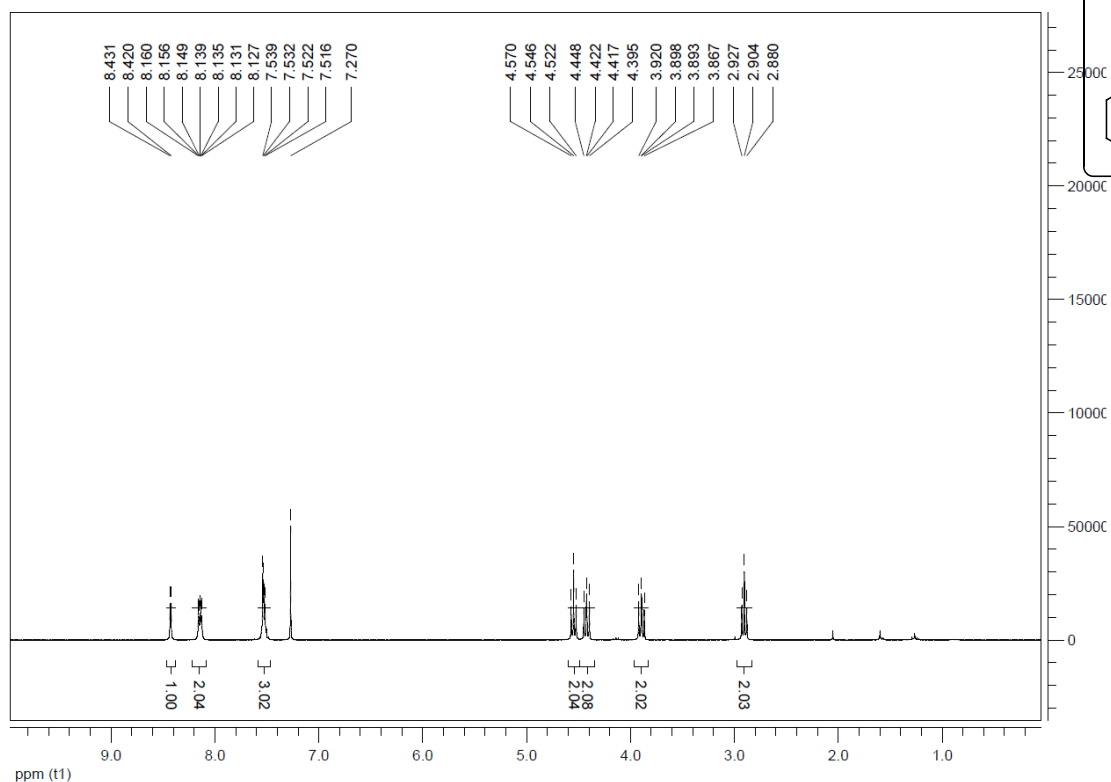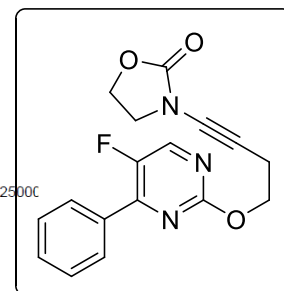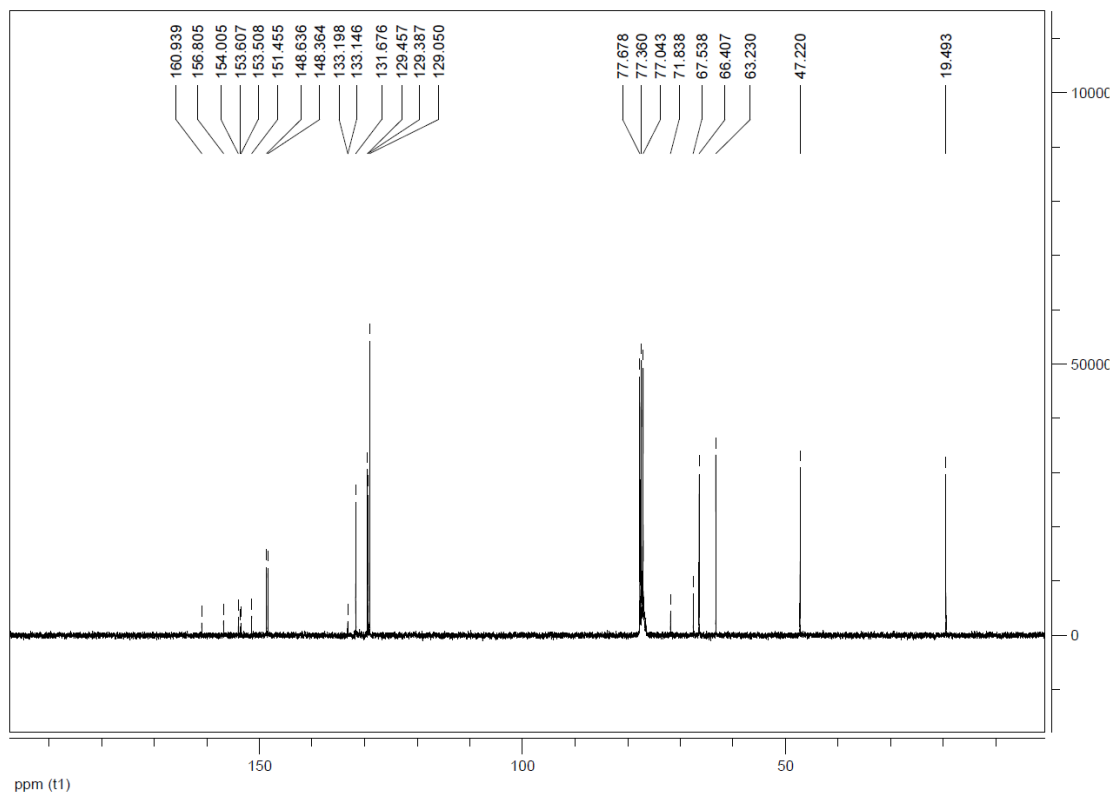

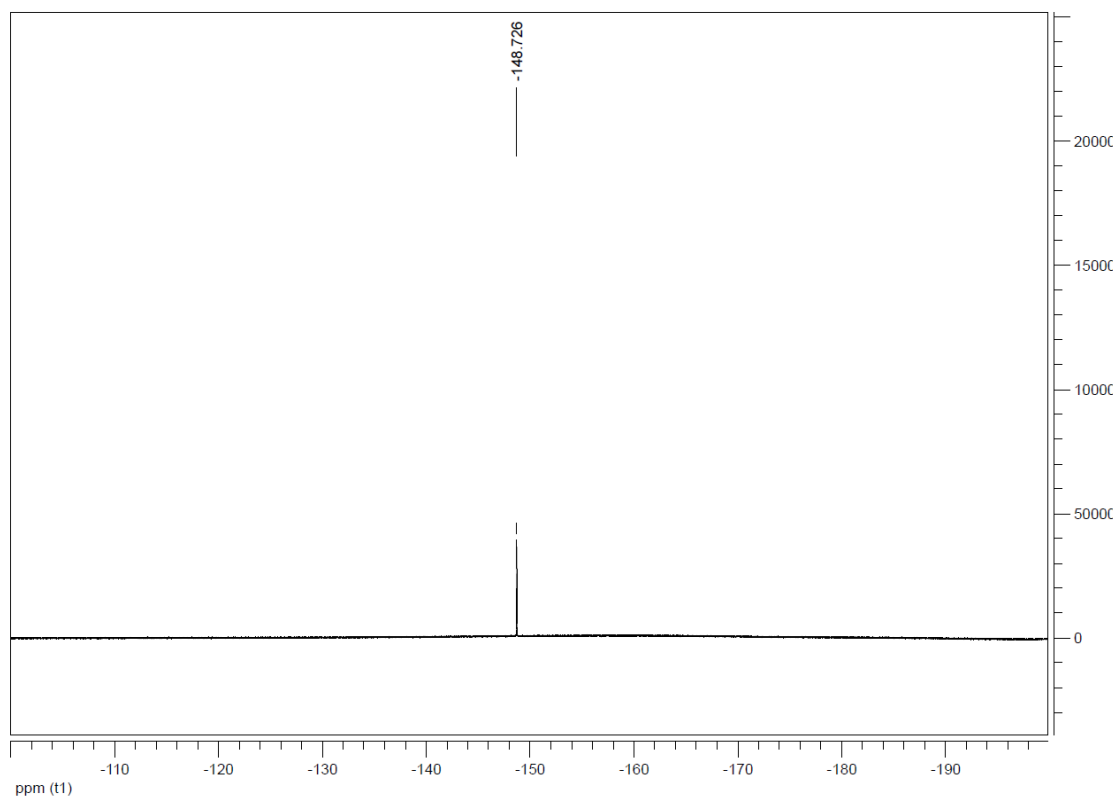

3-(4-(5-Fluoro-4-(4-fluorophenyl)pyrimidin-2-yloxy)but-1-ynyl)oxazolidin-2-one (**3m**)

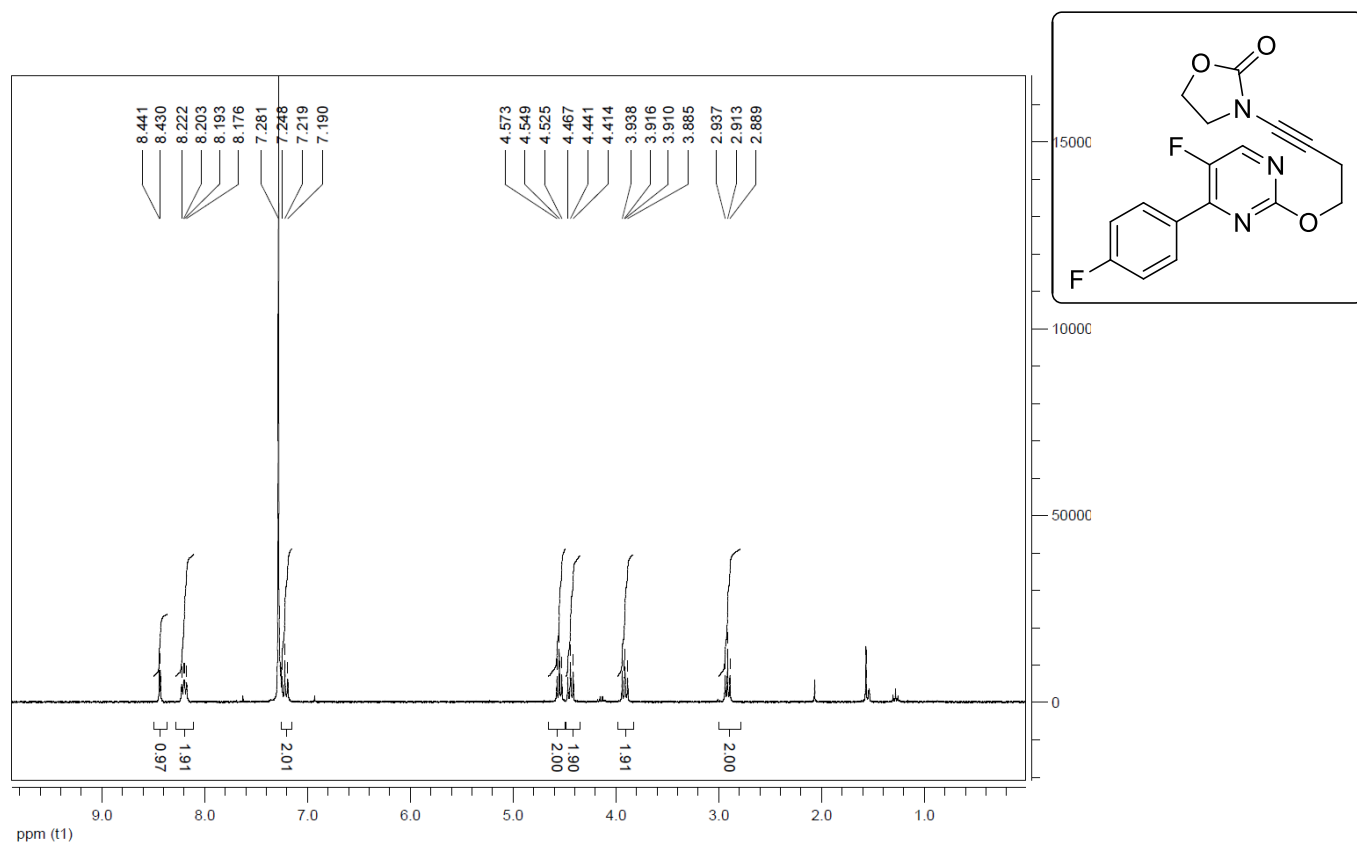



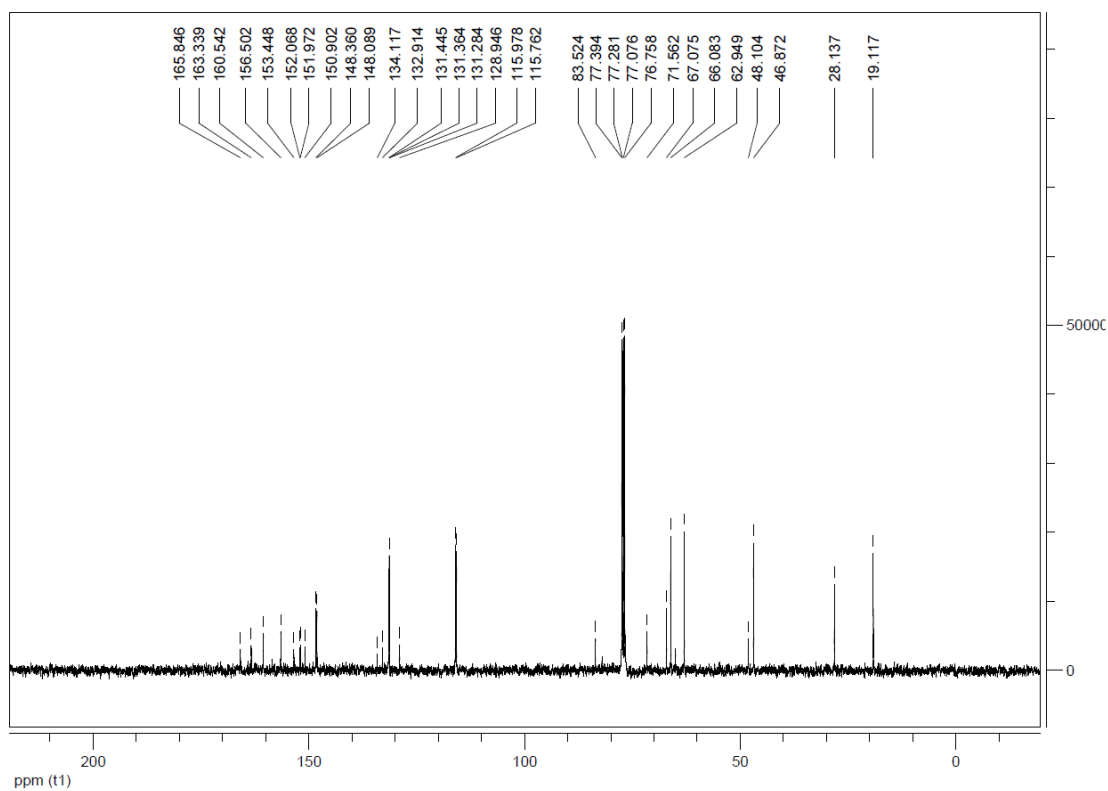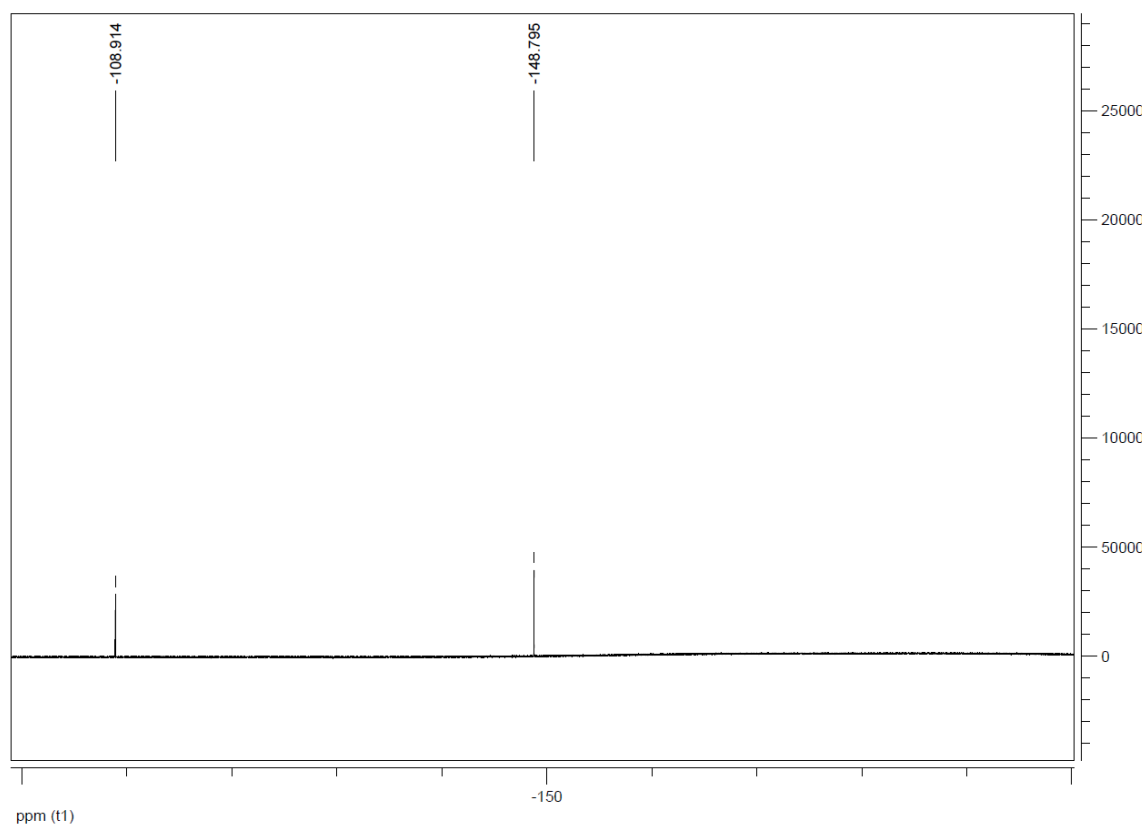

3-(5-(4-(Trifluoromethyl)pyrimidin-2-yloxy)pent-1-ynyl)oxazolidin-2-one (**3n**)

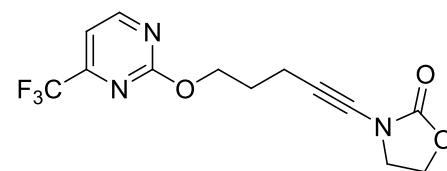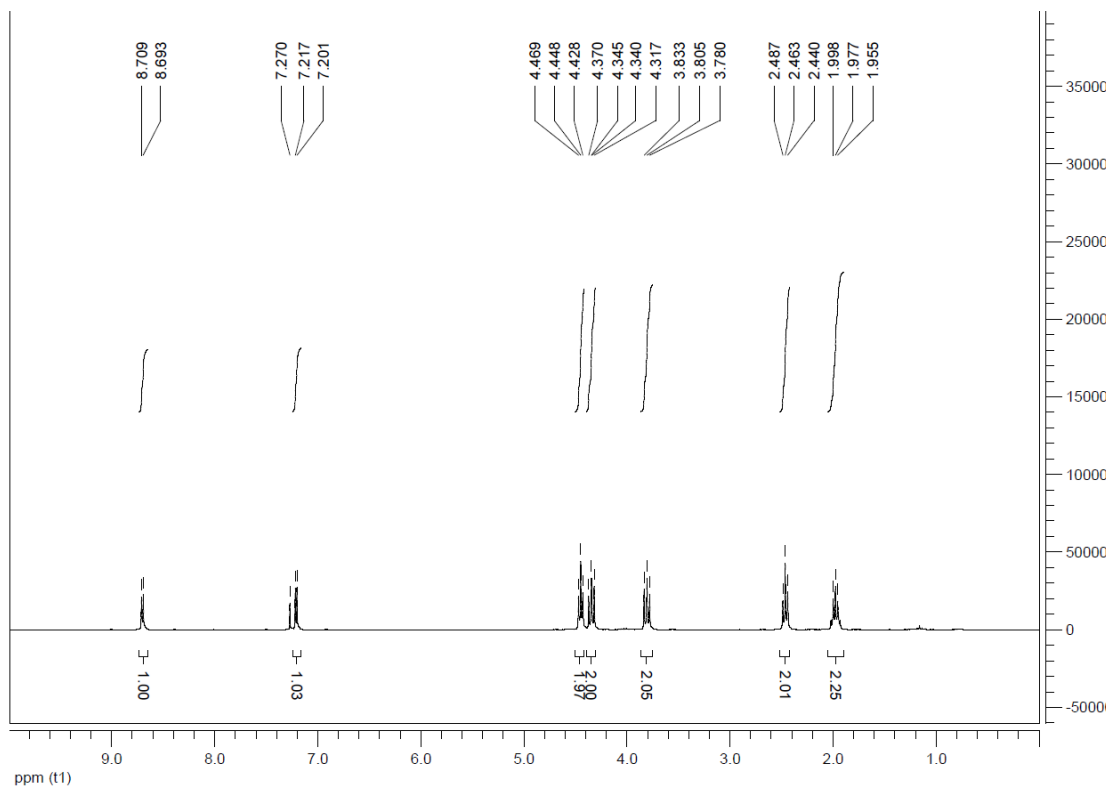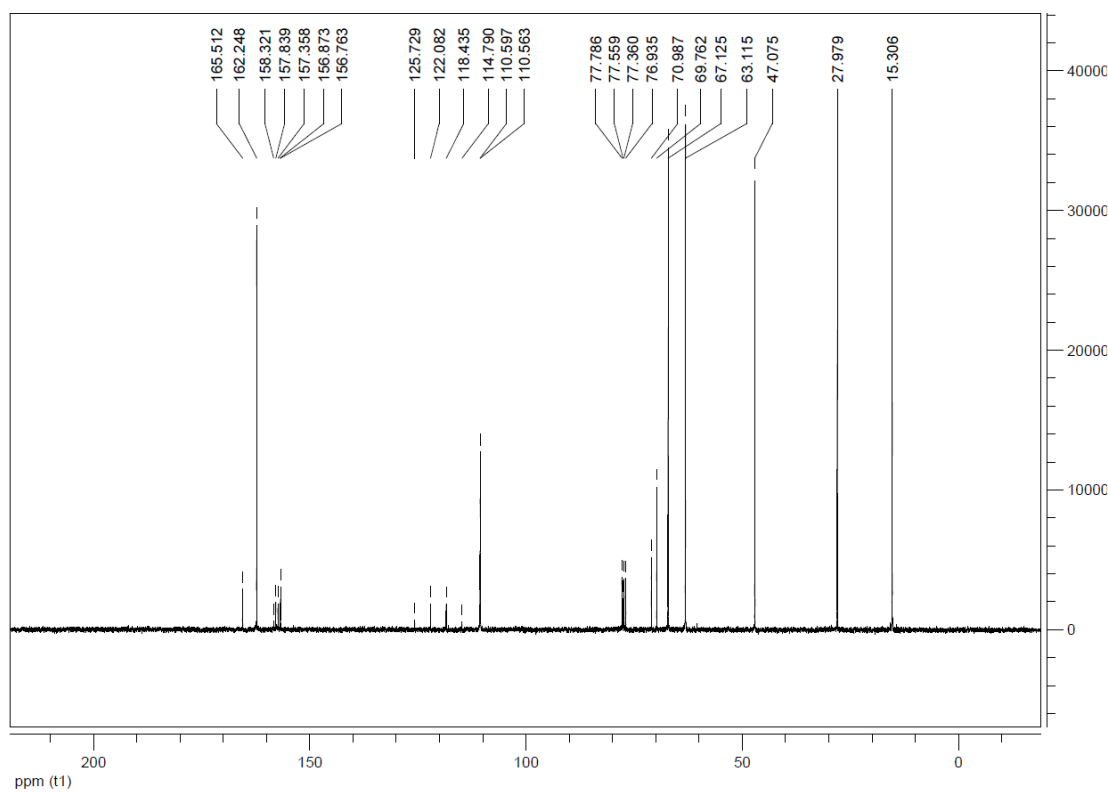

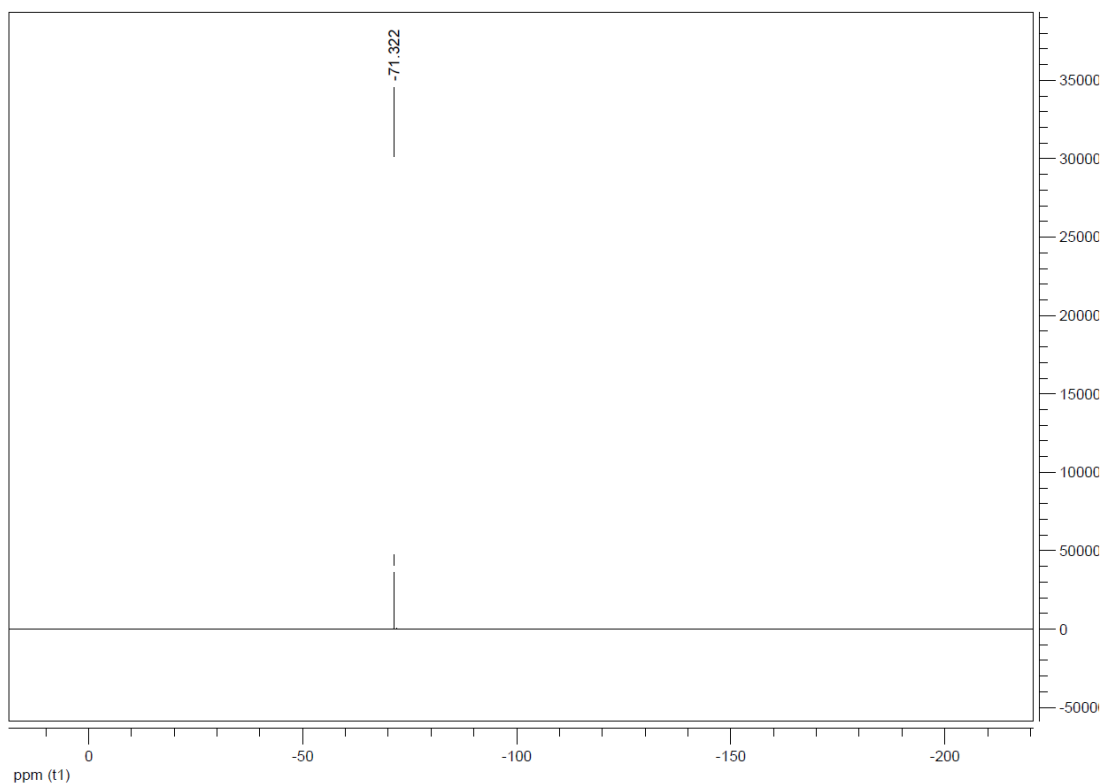

3-(6-(4-(Trifluoromethyl)pyrimidin-2-yloxy)hex-1-ynyl)oxazolidin-2-one (**3o**)

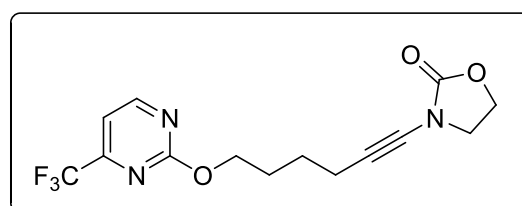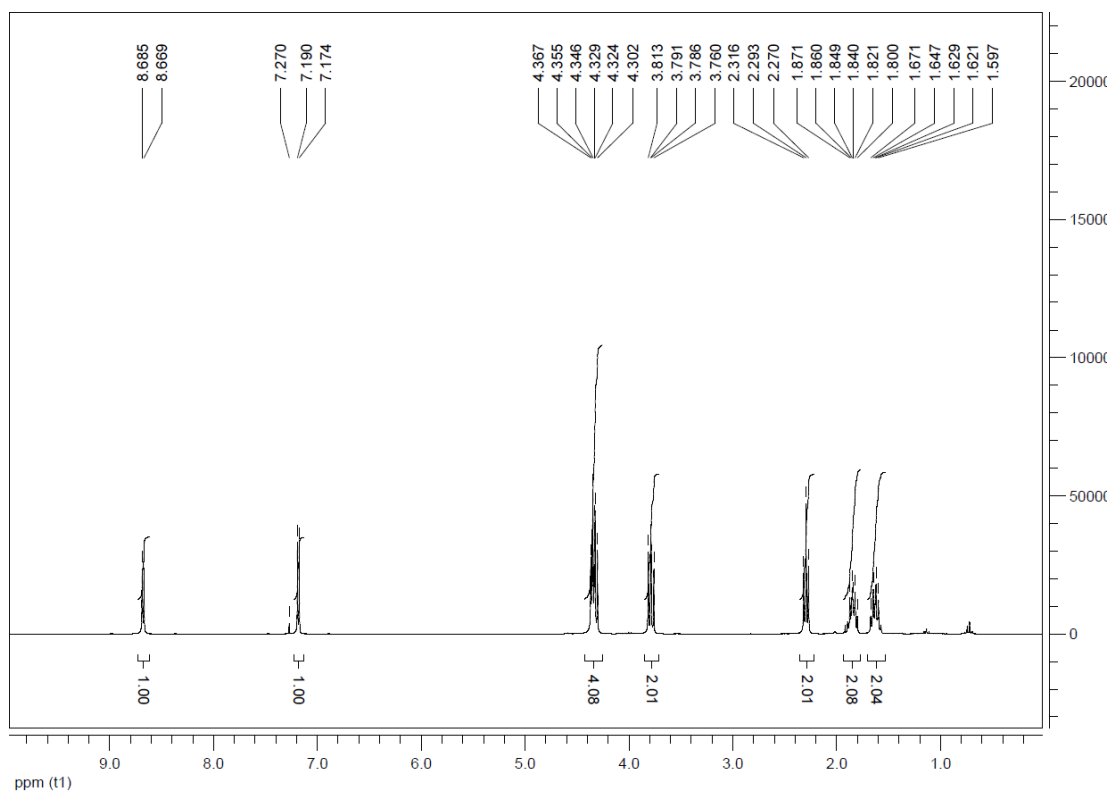

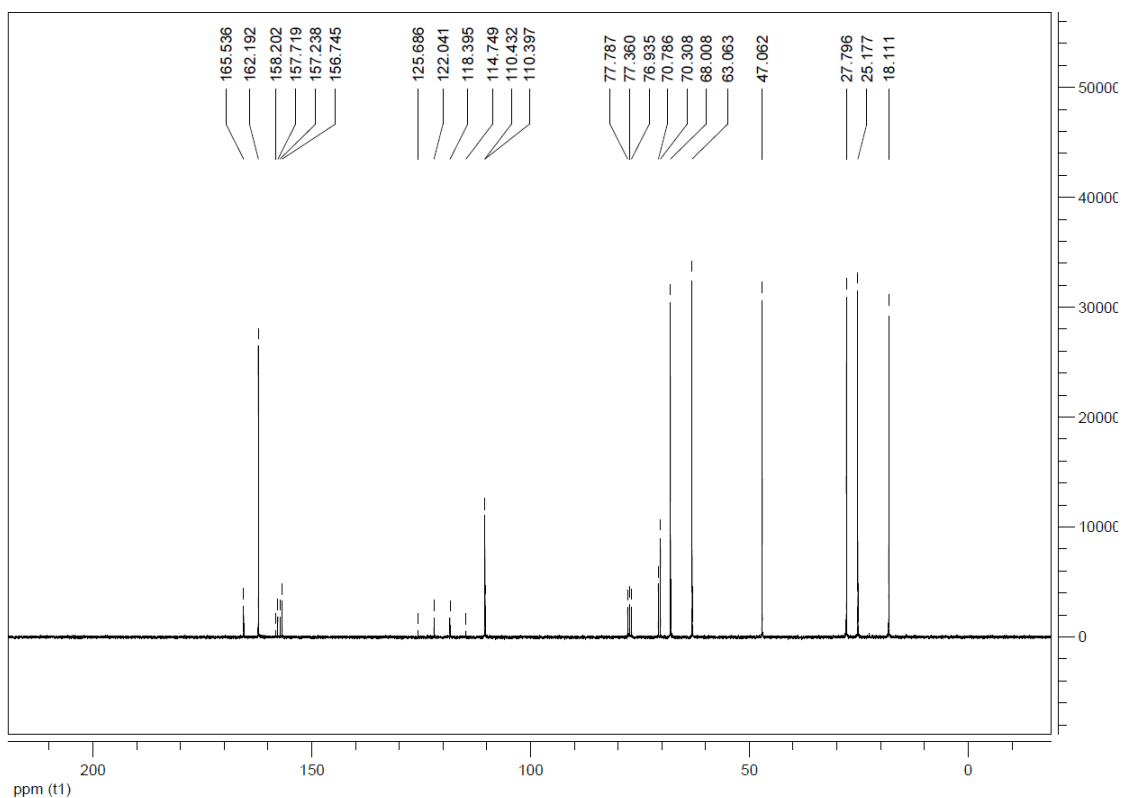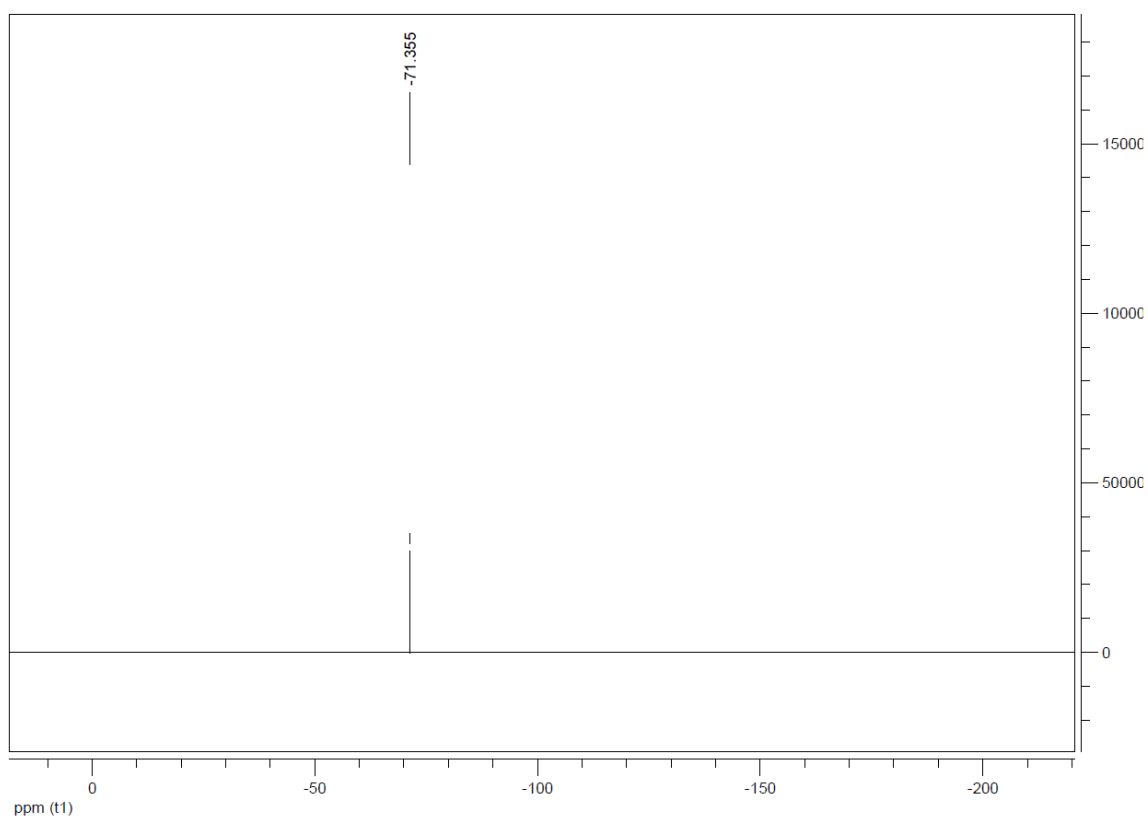

3-((2-(4-(Trifluoromethyl)pyrimidin-2-yloxy)cyclohexyl)ethynyl)oxazolidin-2-one (**3p**)

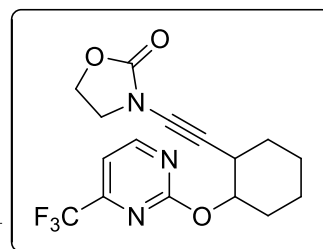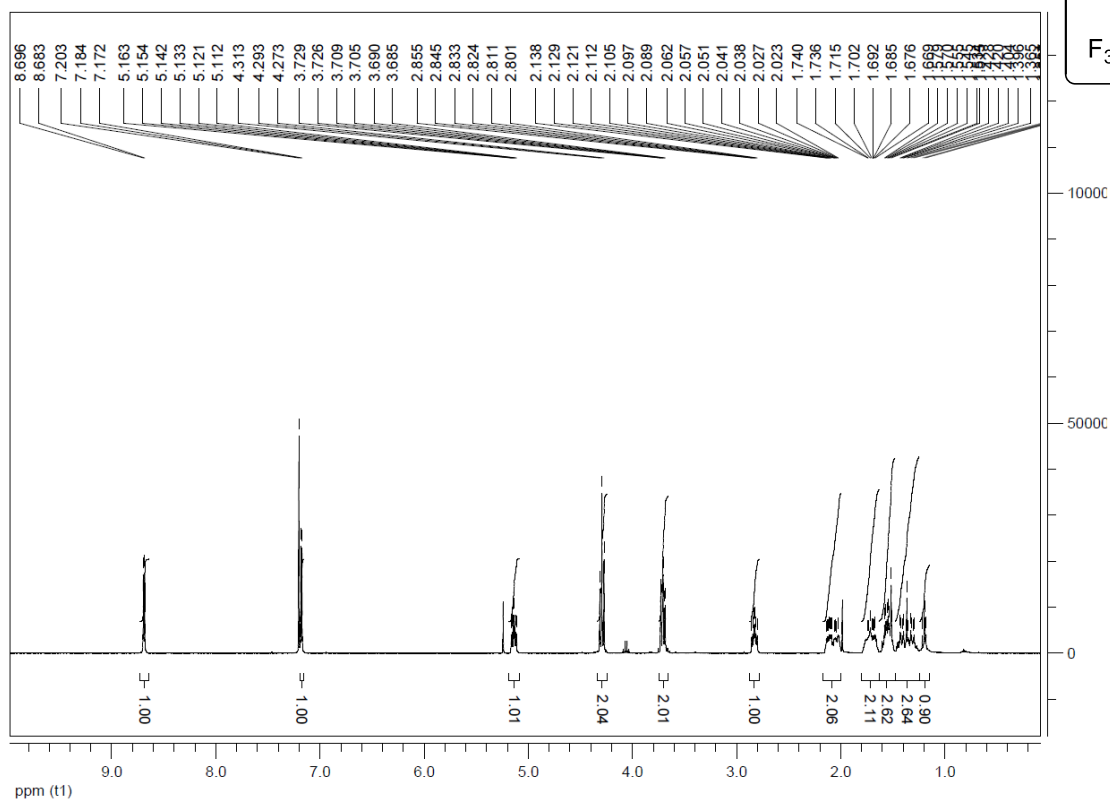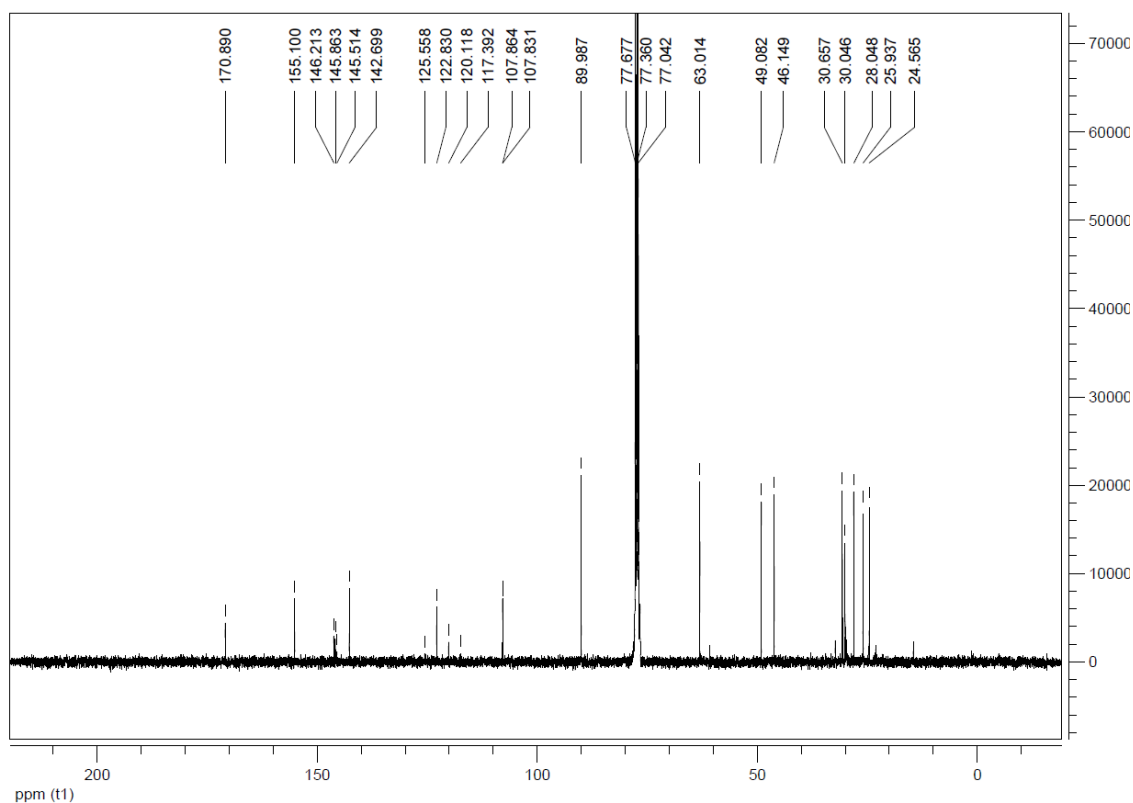

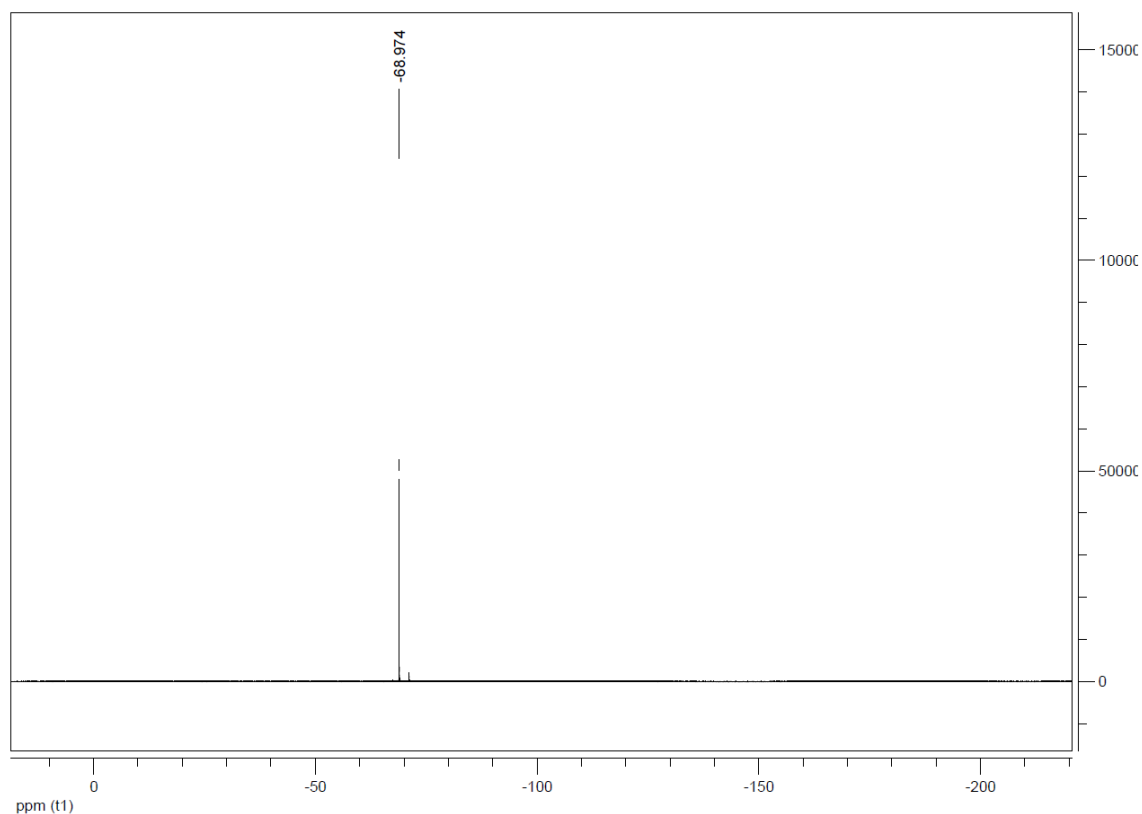

1-((2-(4-(Trifluoromethyl)pyrimidin-2-yloxy)cyclohexyl)ethynyl)azetidin-2-one (**3p**)

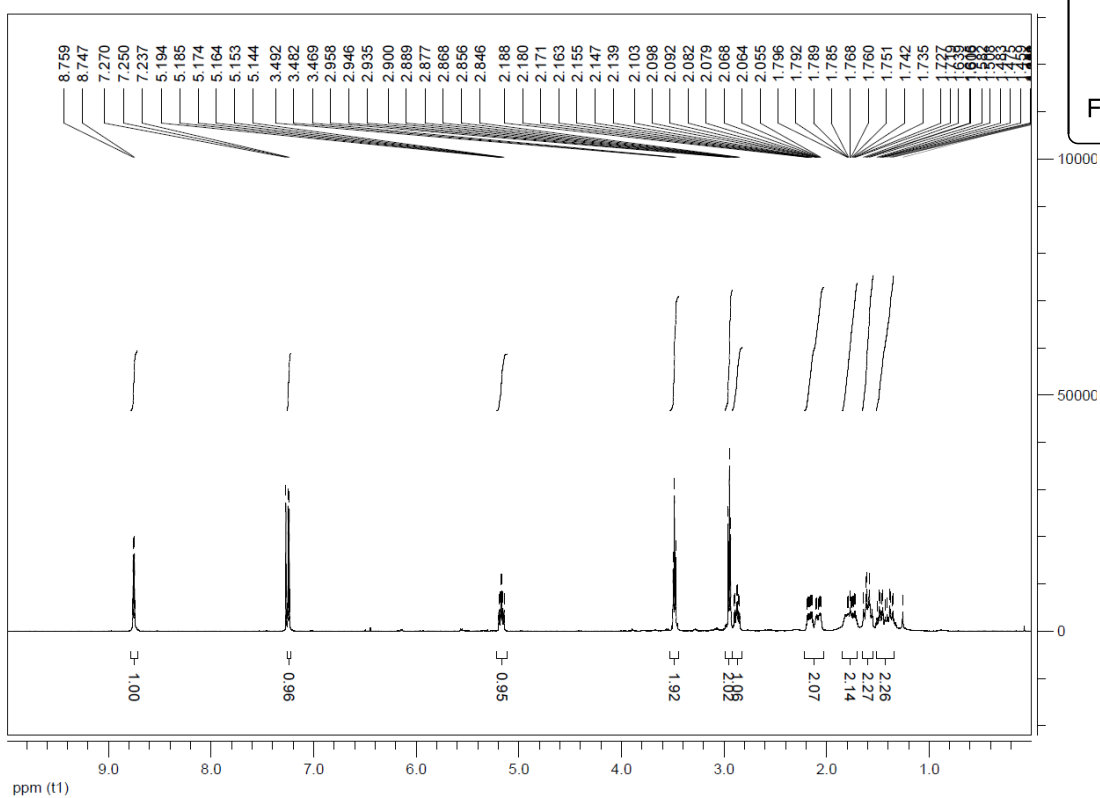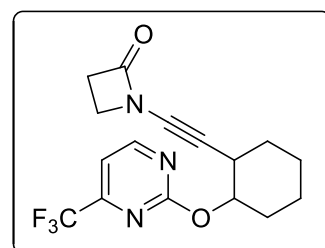

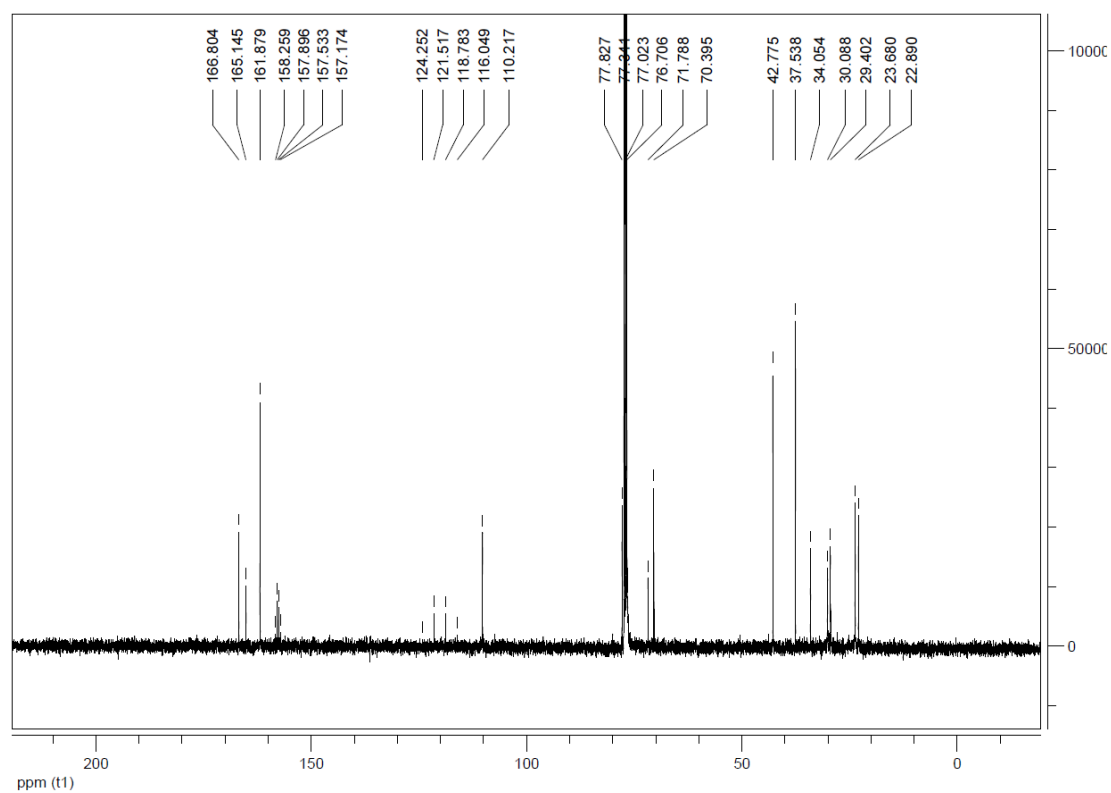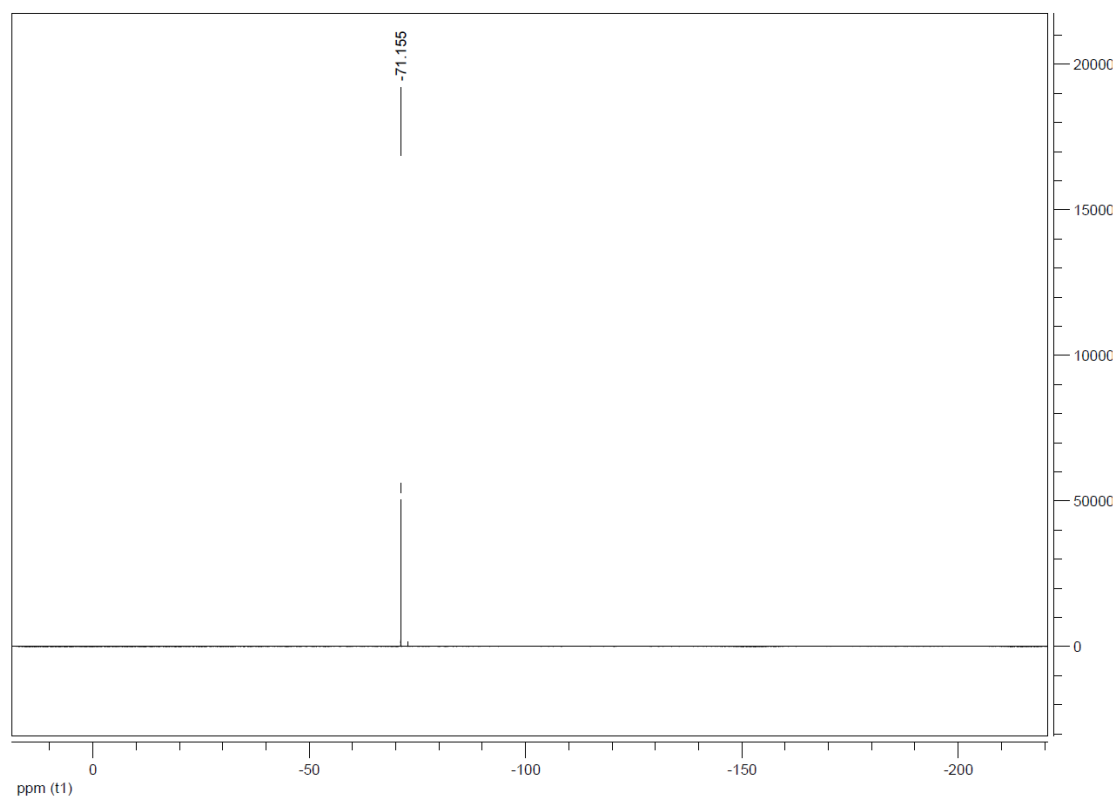

3-(3-(1-(4-(Trifluoromethyl)pyrimidin-2-yloxy)cyclobutyl)prop-1-ynyl)oxazolidin-2-one (3r)

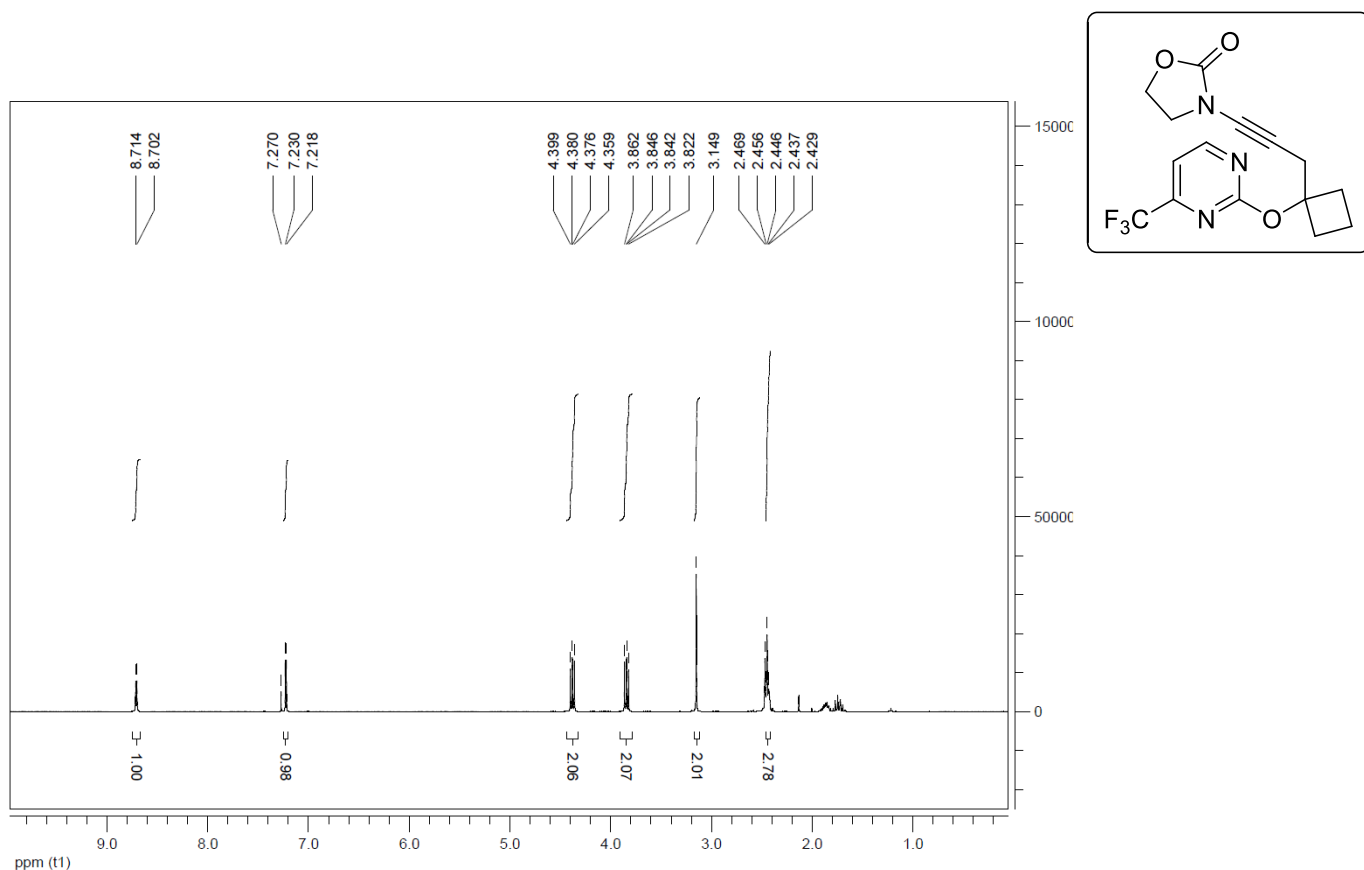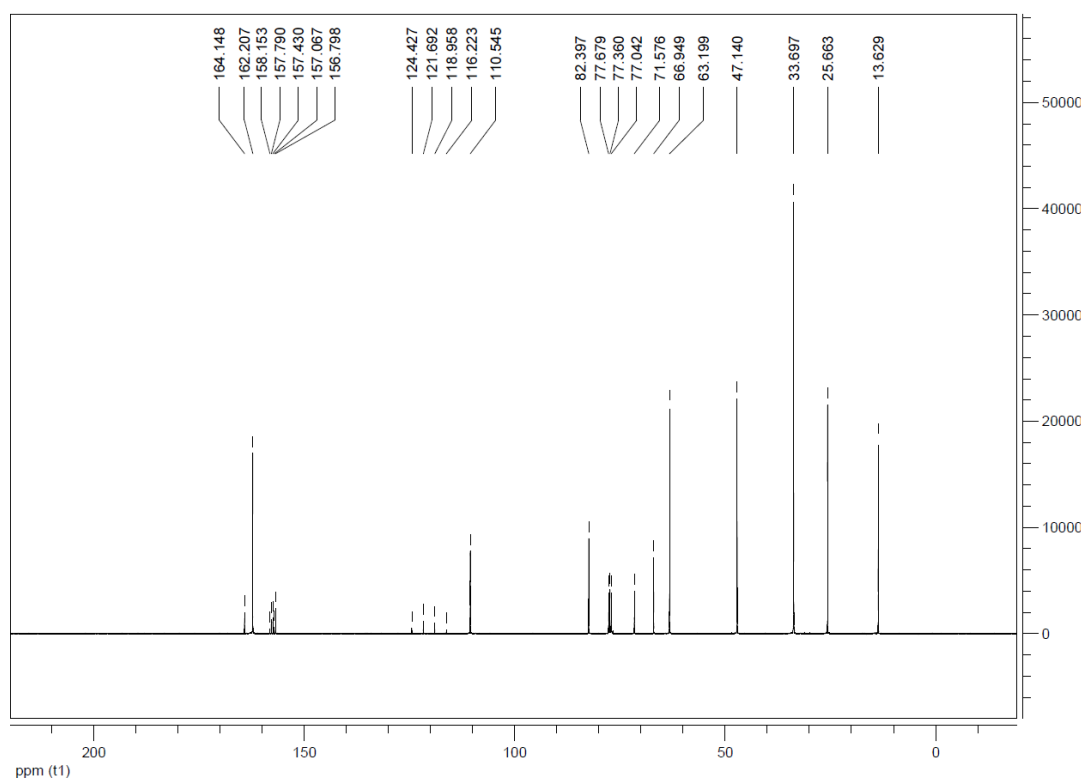



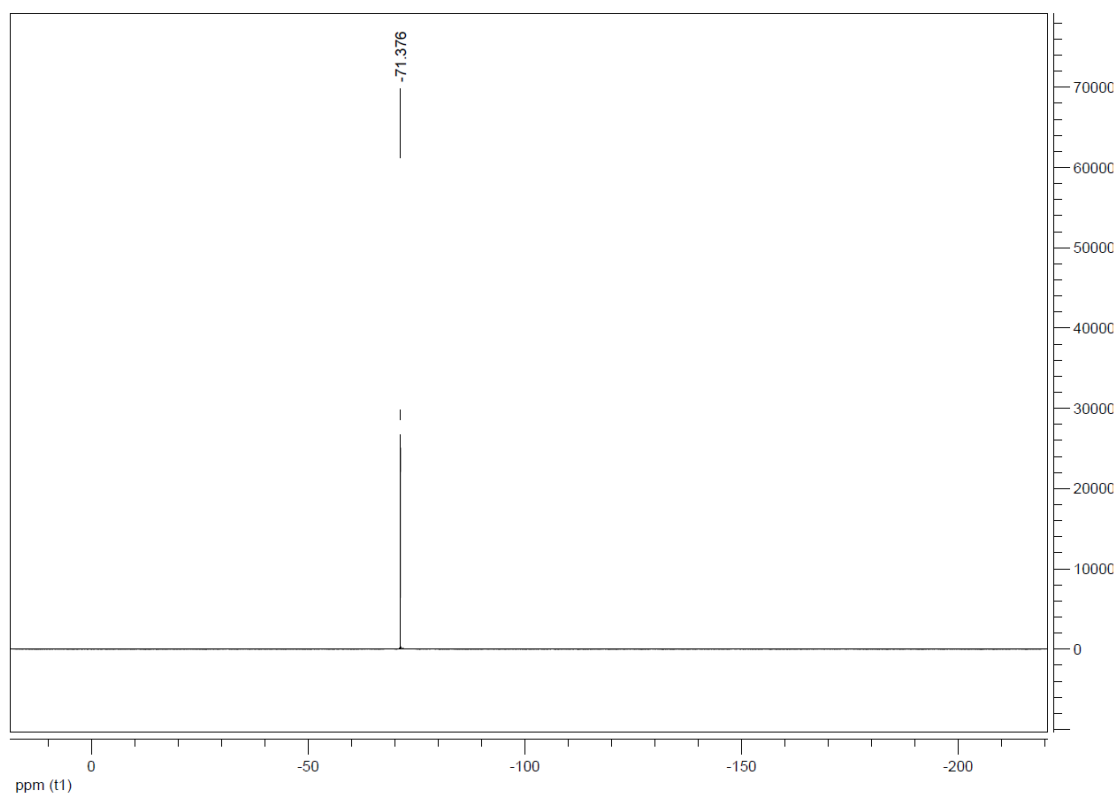

3-(3-(1-(4-(Trifluoromethyl)pyrimidin-2-yloxy)cyclohexyl)prop-1-ynyl)oxazolidin-2-one (3s)

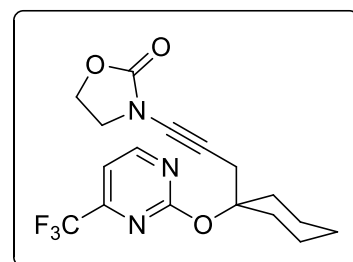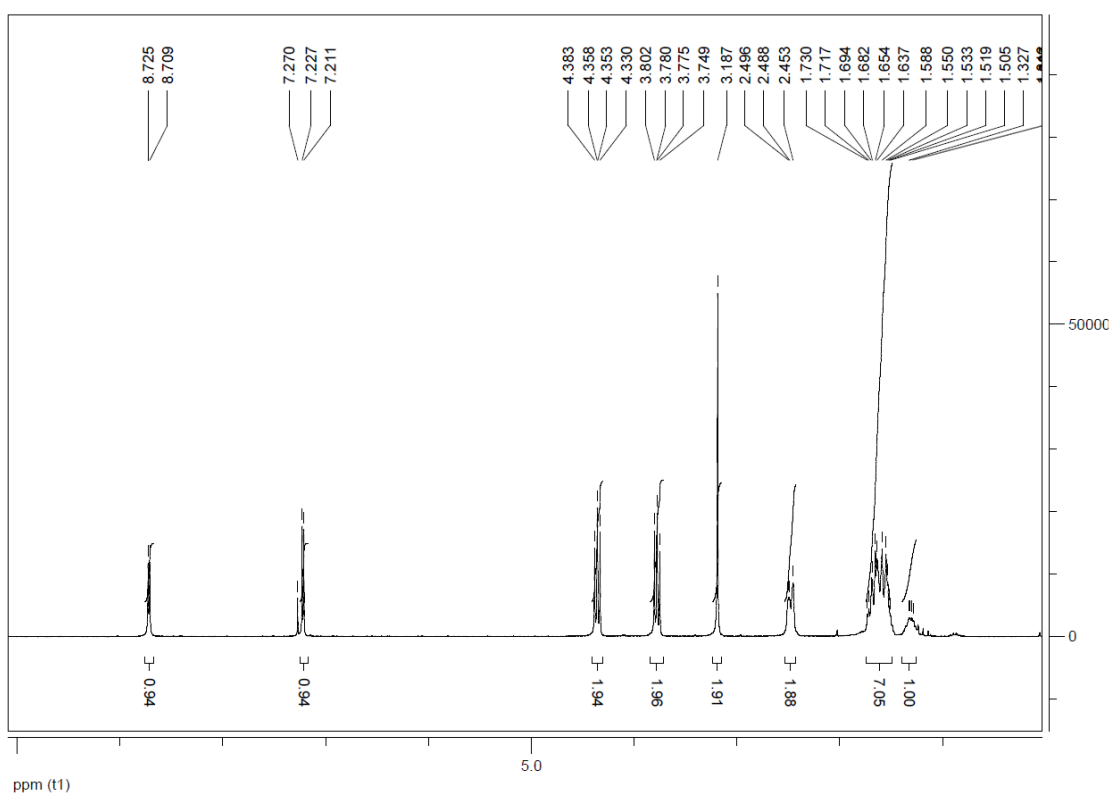

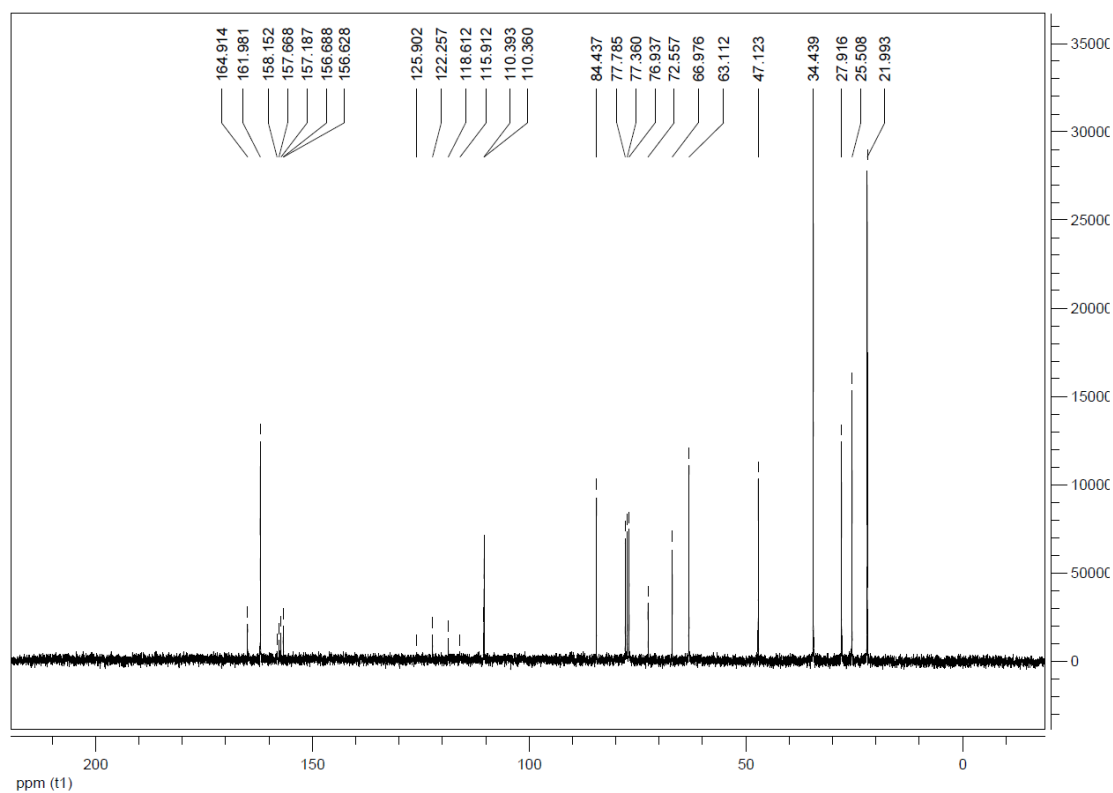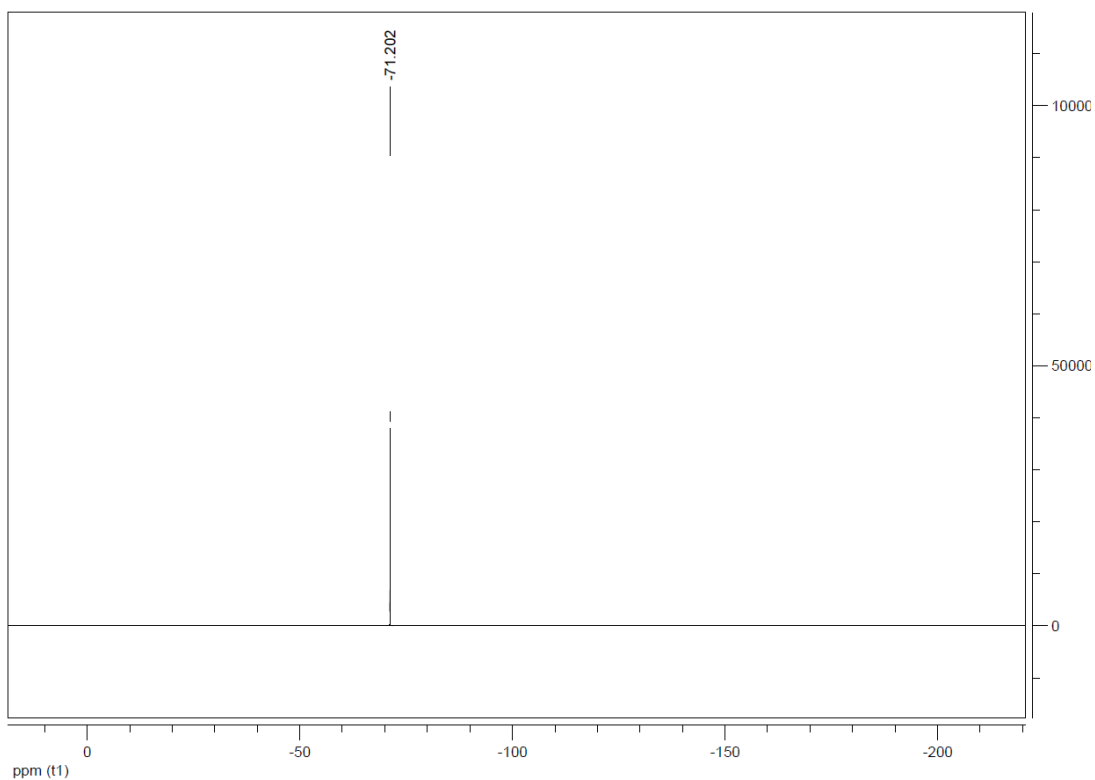

*N*-Methyl-*N*-(3-(1-(4-(trifluoromethyl)pyrimidin-2-yloxy)cyclobutyl)prop-1-ynyl)methanesulfonamide  
(**3t**)

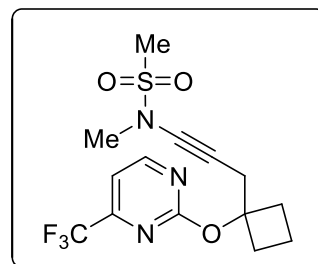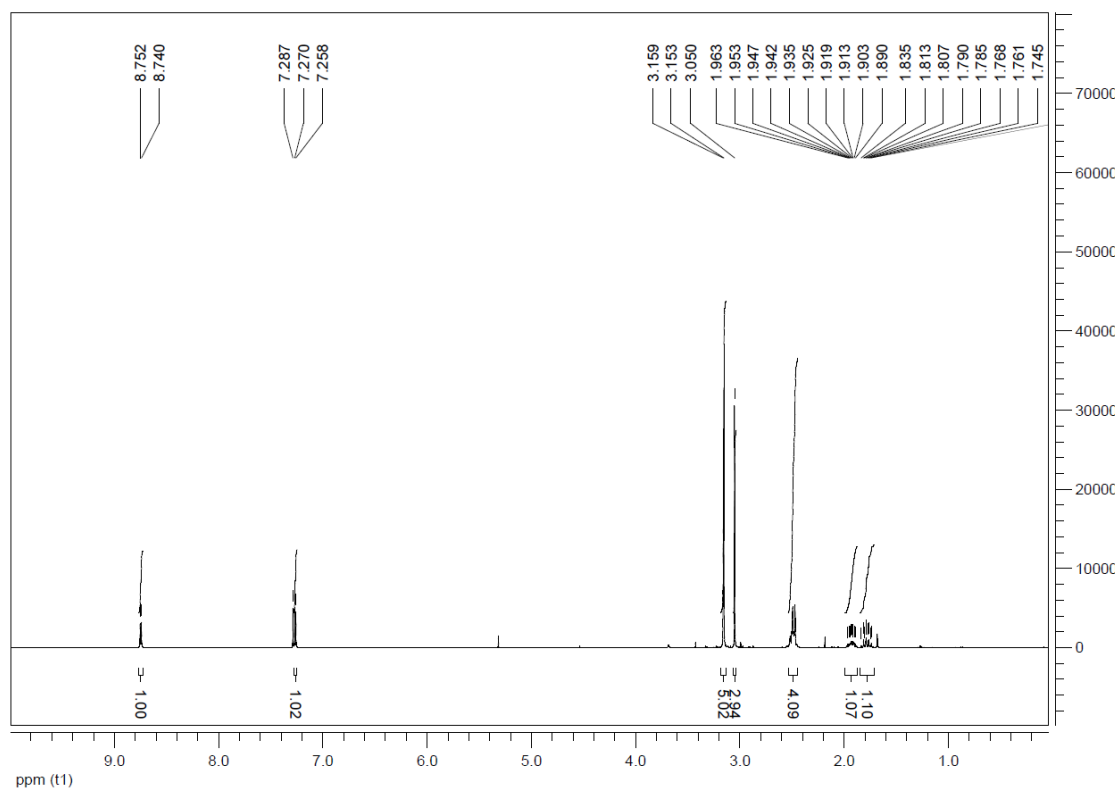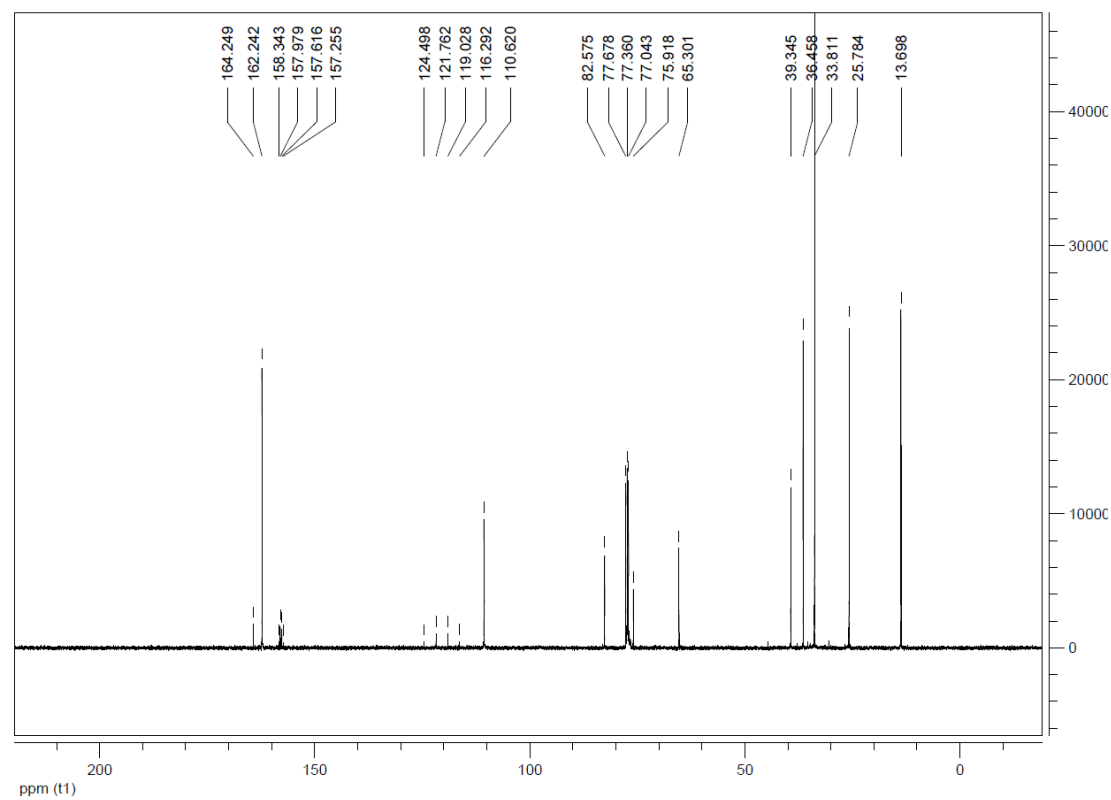

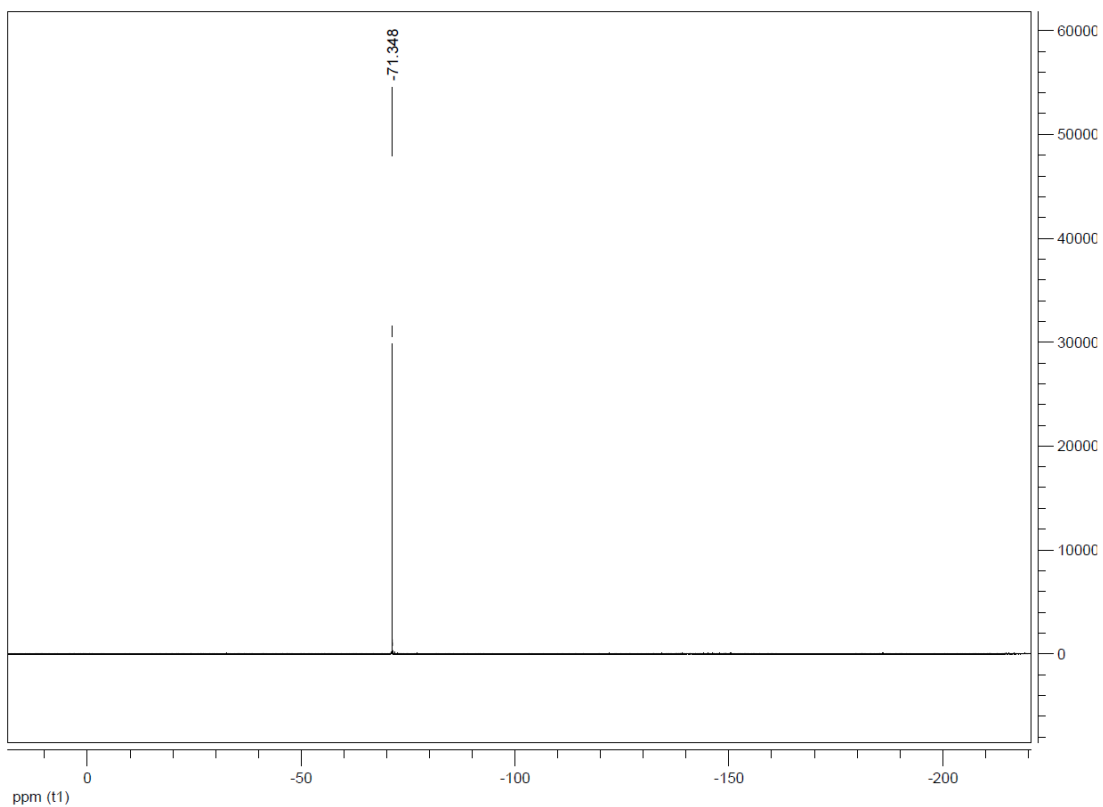

Methyl 1-(3-(1-(4-(trifluoromethyl)pyrimidin-2-yloxy)cyclobutyl)prop-1-ynyl)-1H-indole-3-carboxylate  
(**3u**)

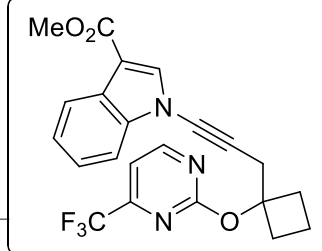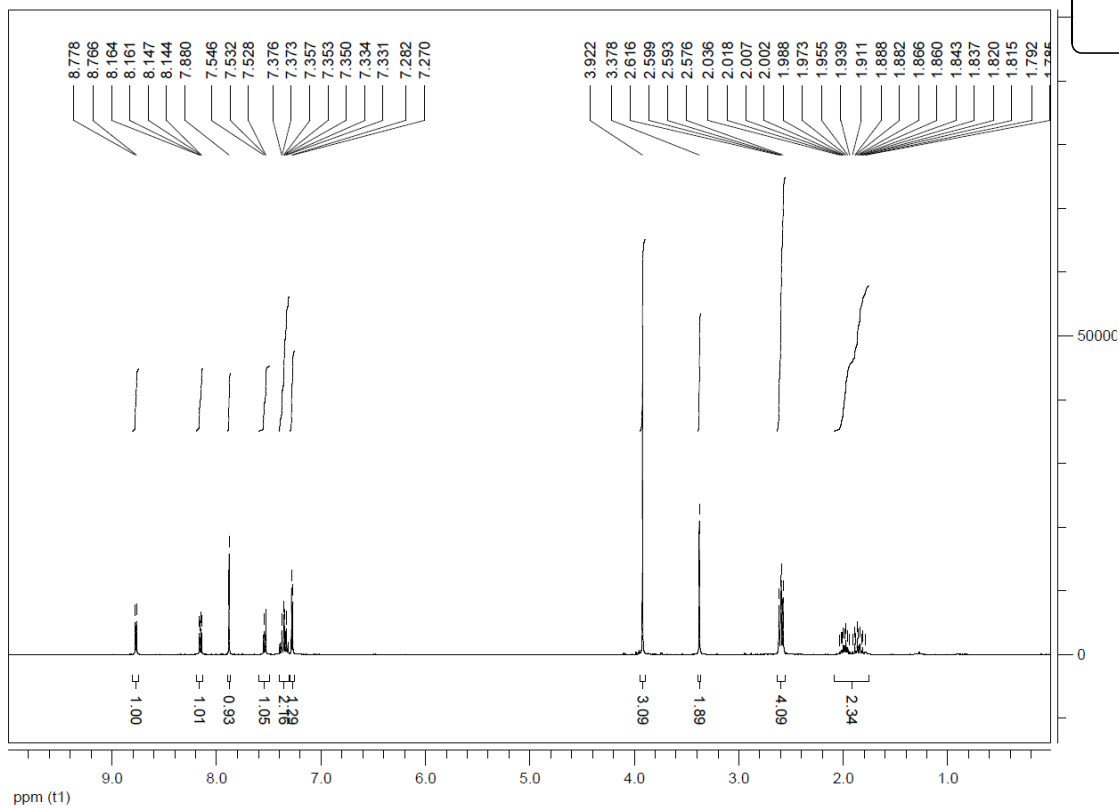

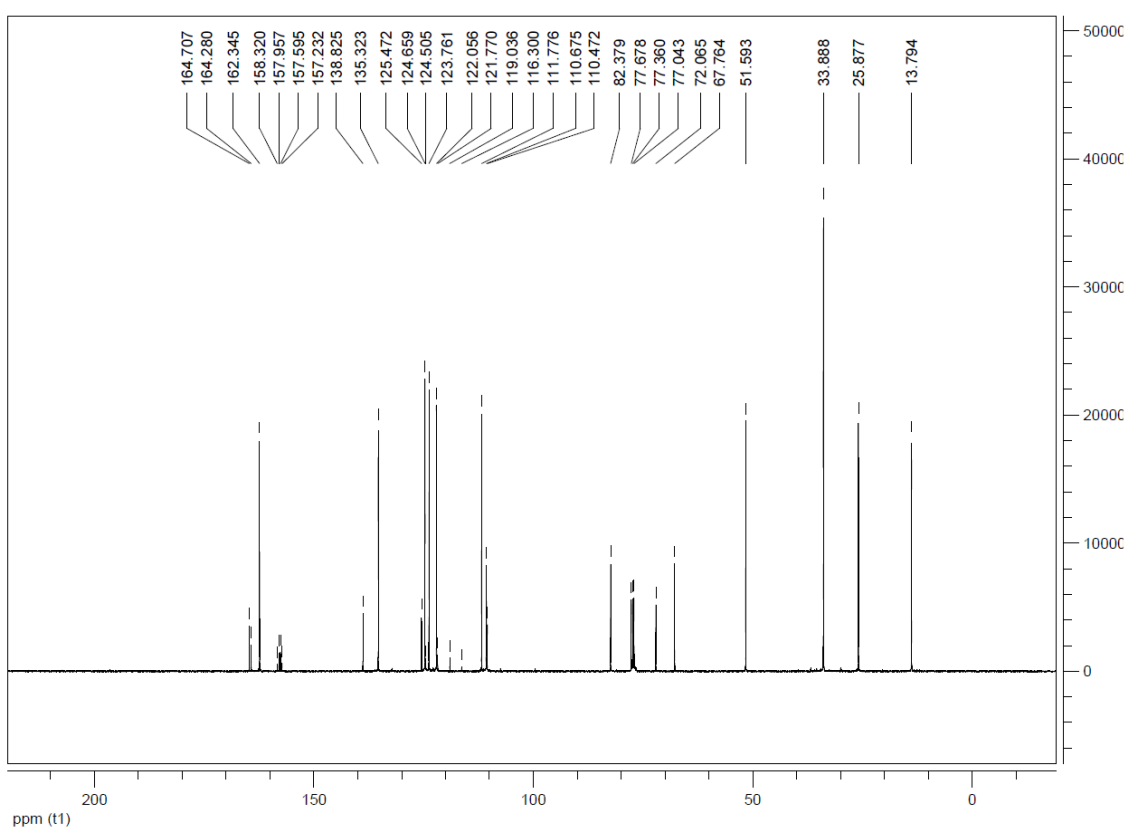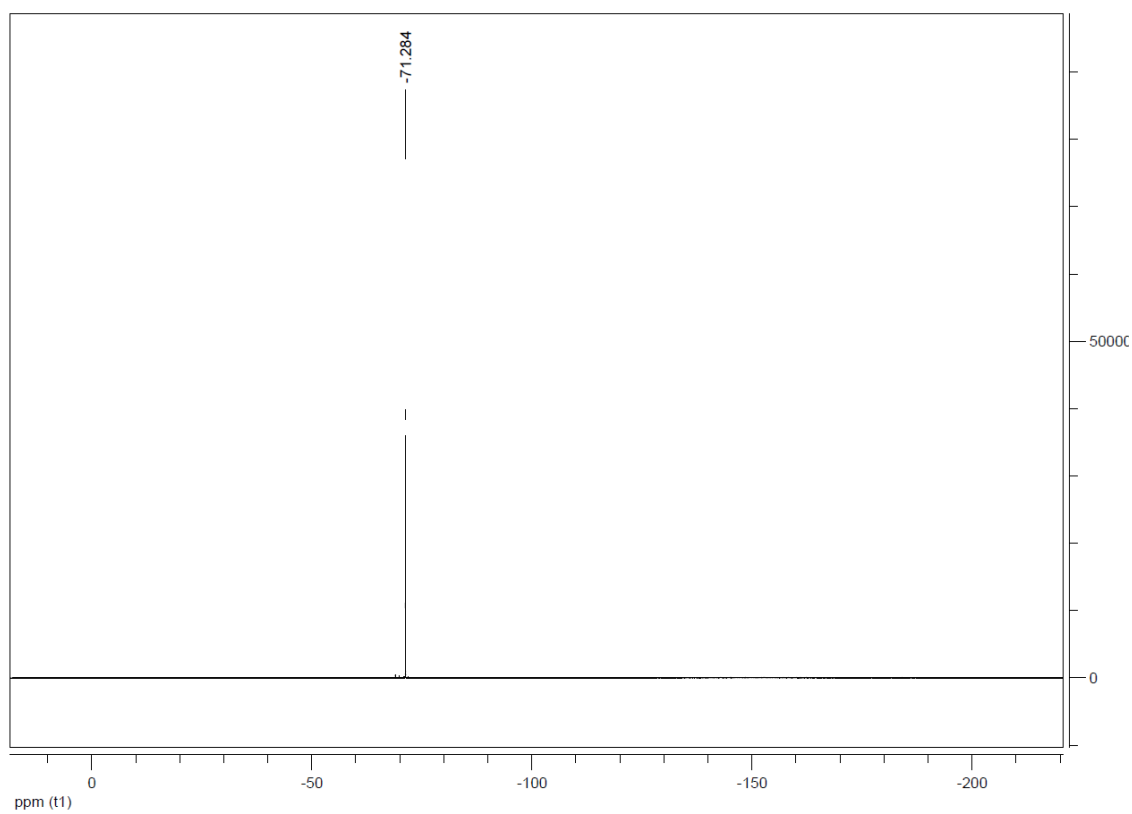

3-(4-(4-(trifluoromethyl)pyrimidin-2-ylthio)but-1-ynyl)oxazolidin-2-one (**3v**)

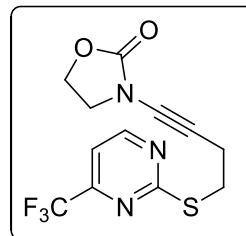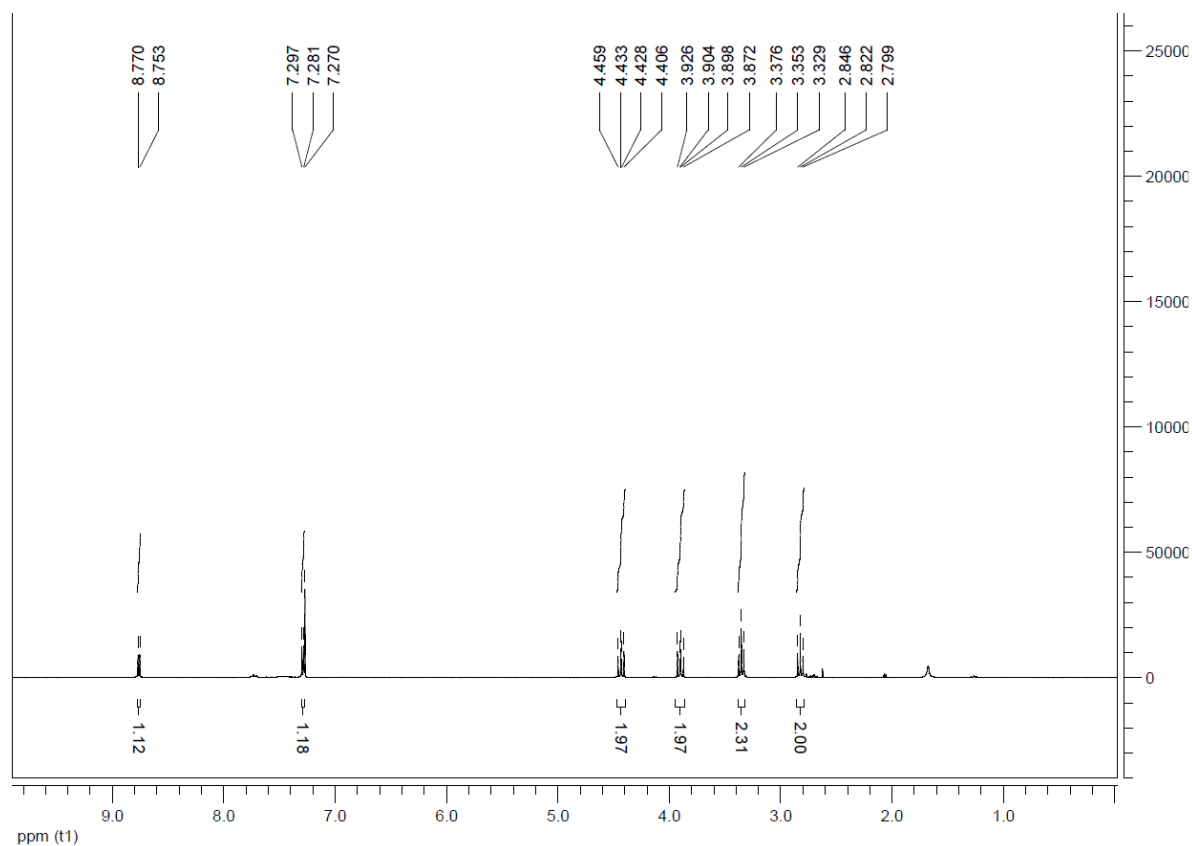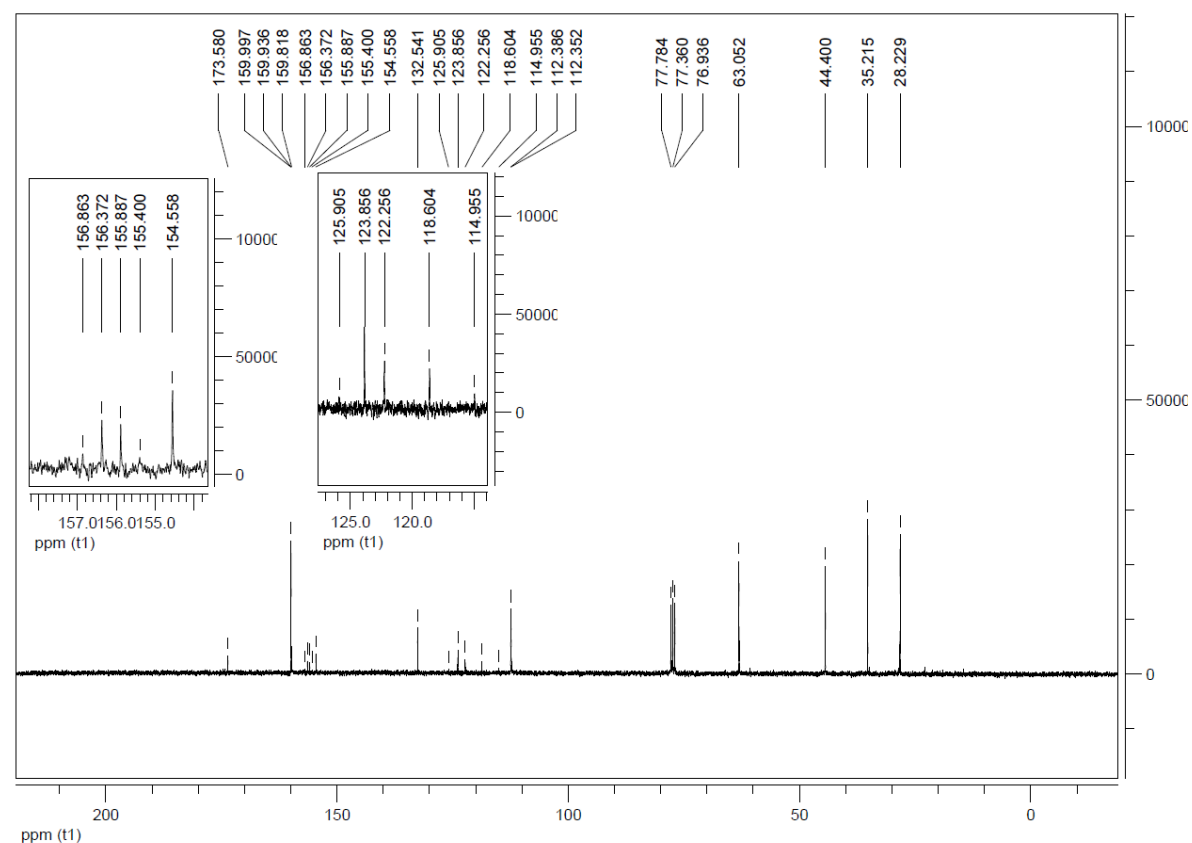

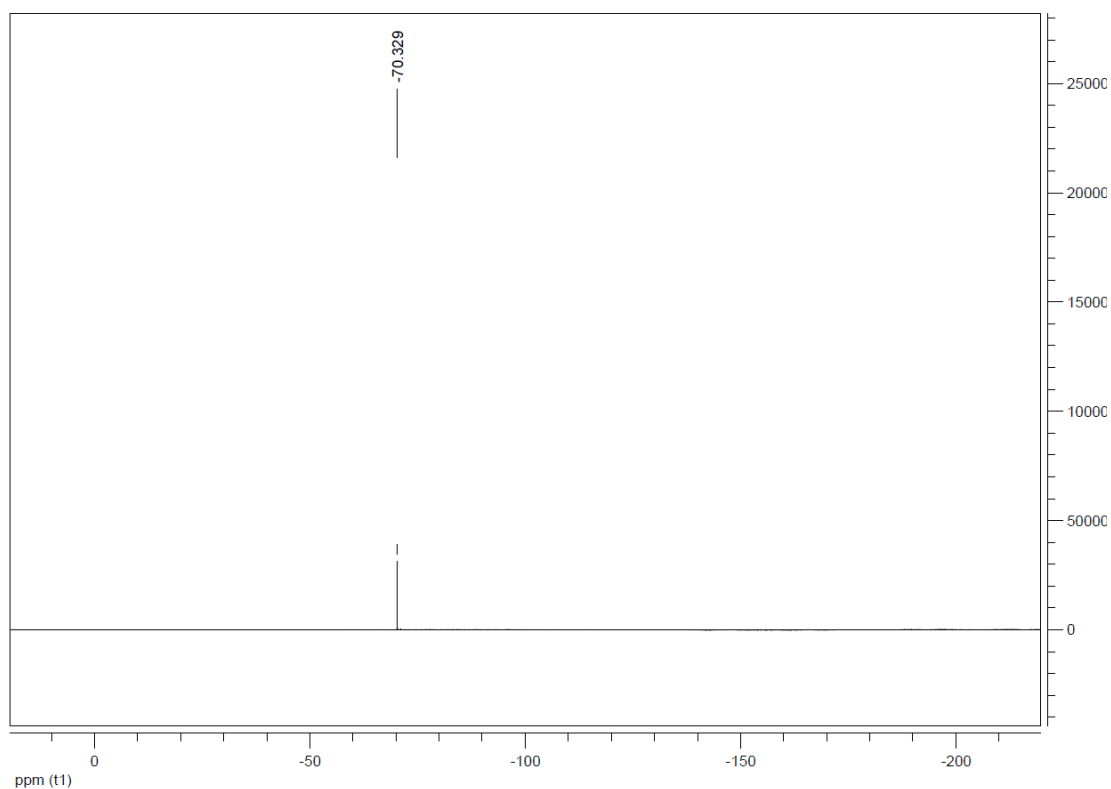

N-(4-(2-oxooxazolidin-3-yl)but-3-ynyl)-N-(4-(trifluoromethyl)pyrimidin-2-yl)acetamide (3w)

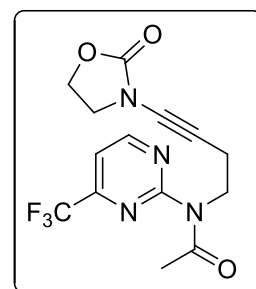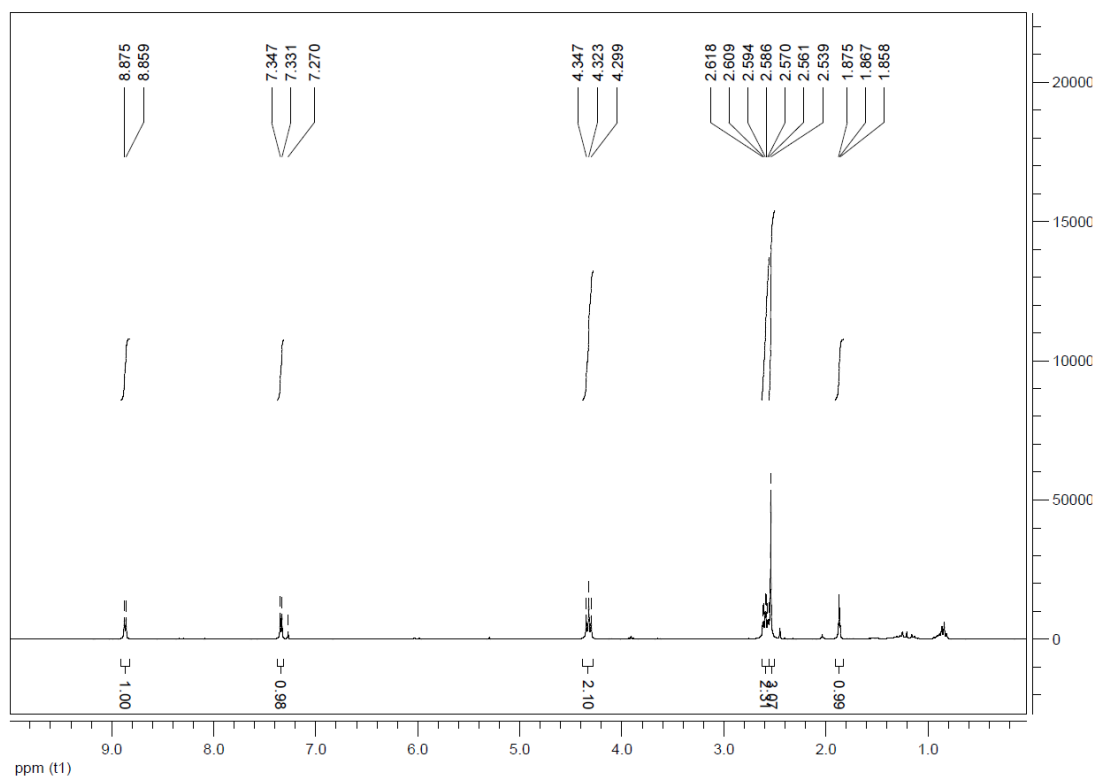

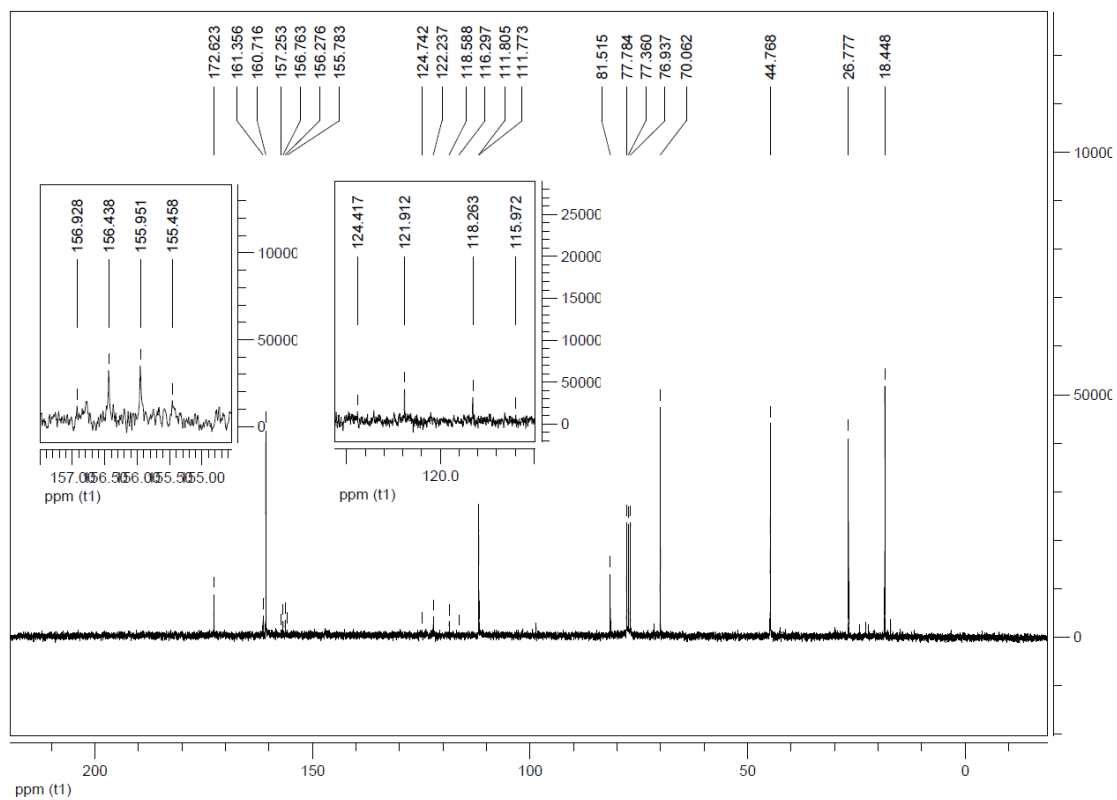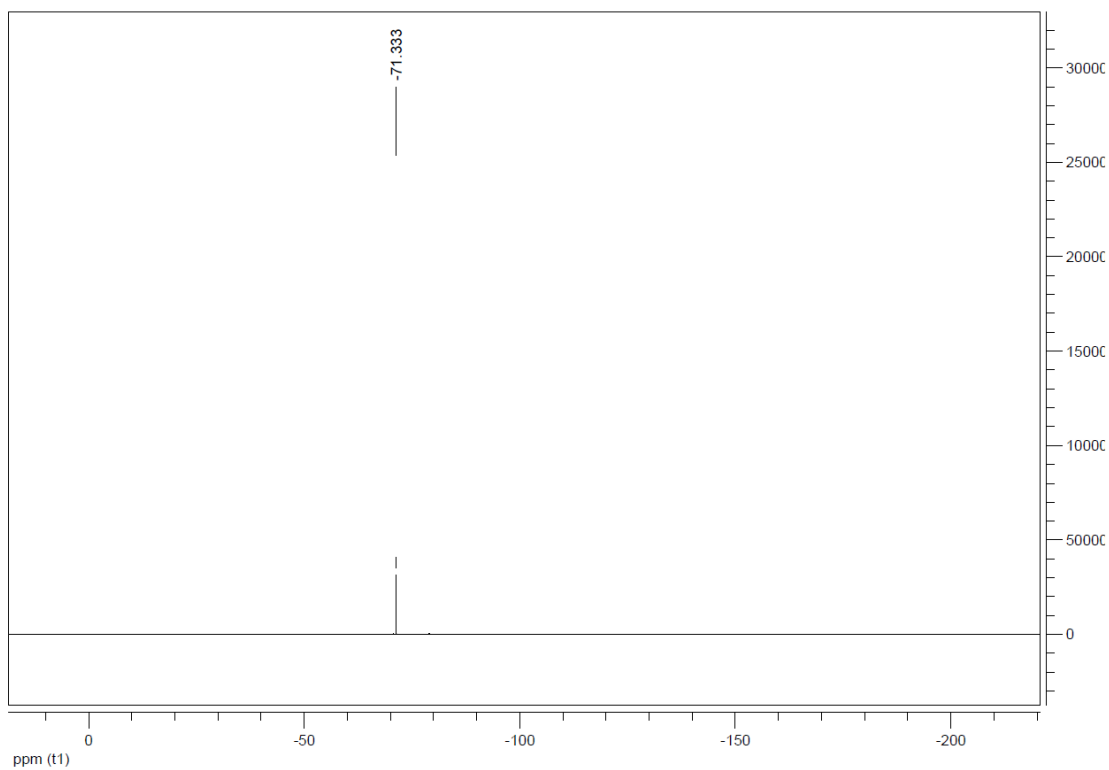



N-(4-(2-oxoazetidin-1-yl)but-3-ynyl)-N-(4-(trifluoromethyl)pyrimidin-2-yl)acetamide (**3x**)

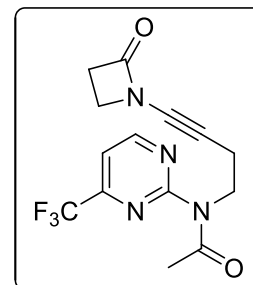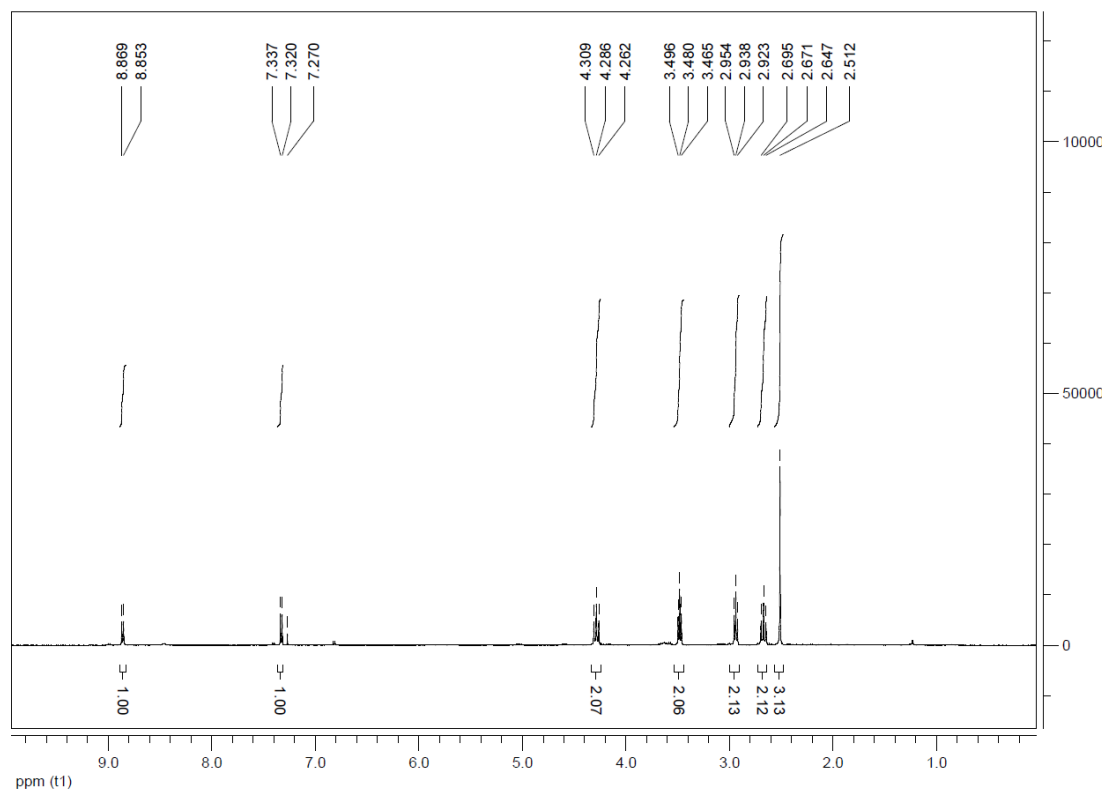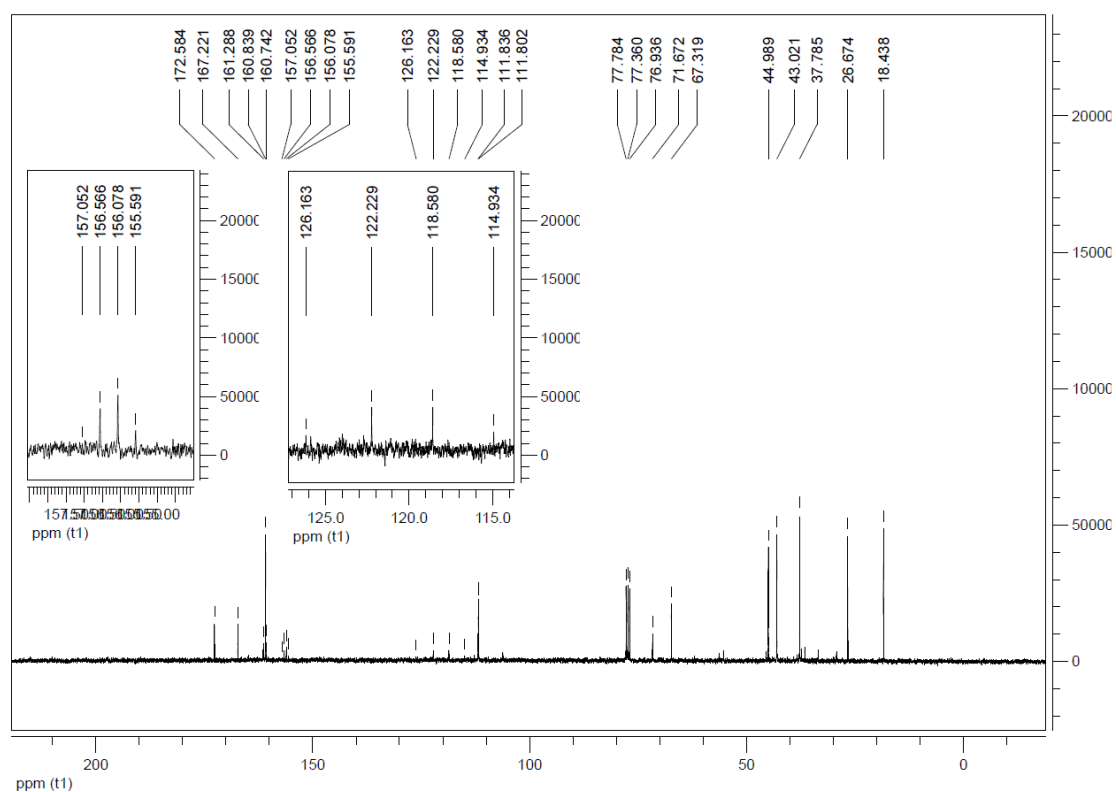

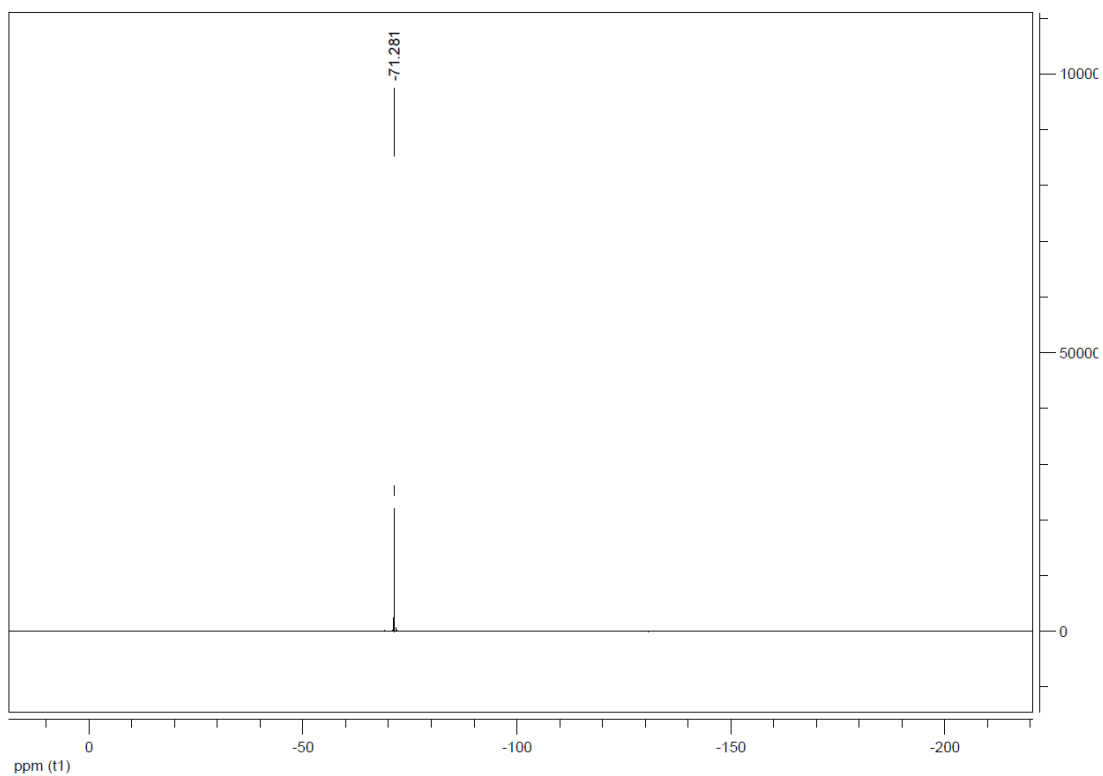

3-(6-(Trifluoromethyl)-2,3-dihydrofuro[2,3-b]pyridin-4-yl)oxazolidin-2-one (**4a**)

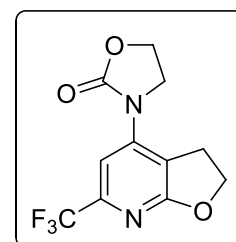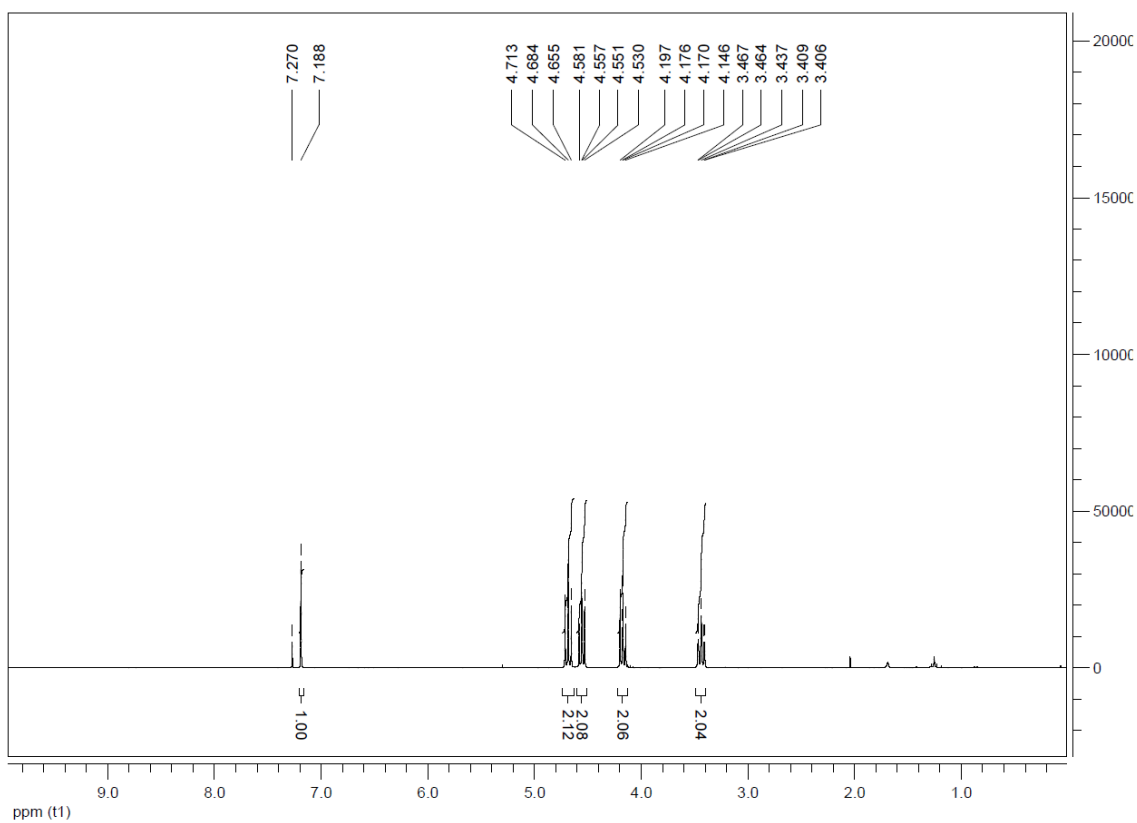

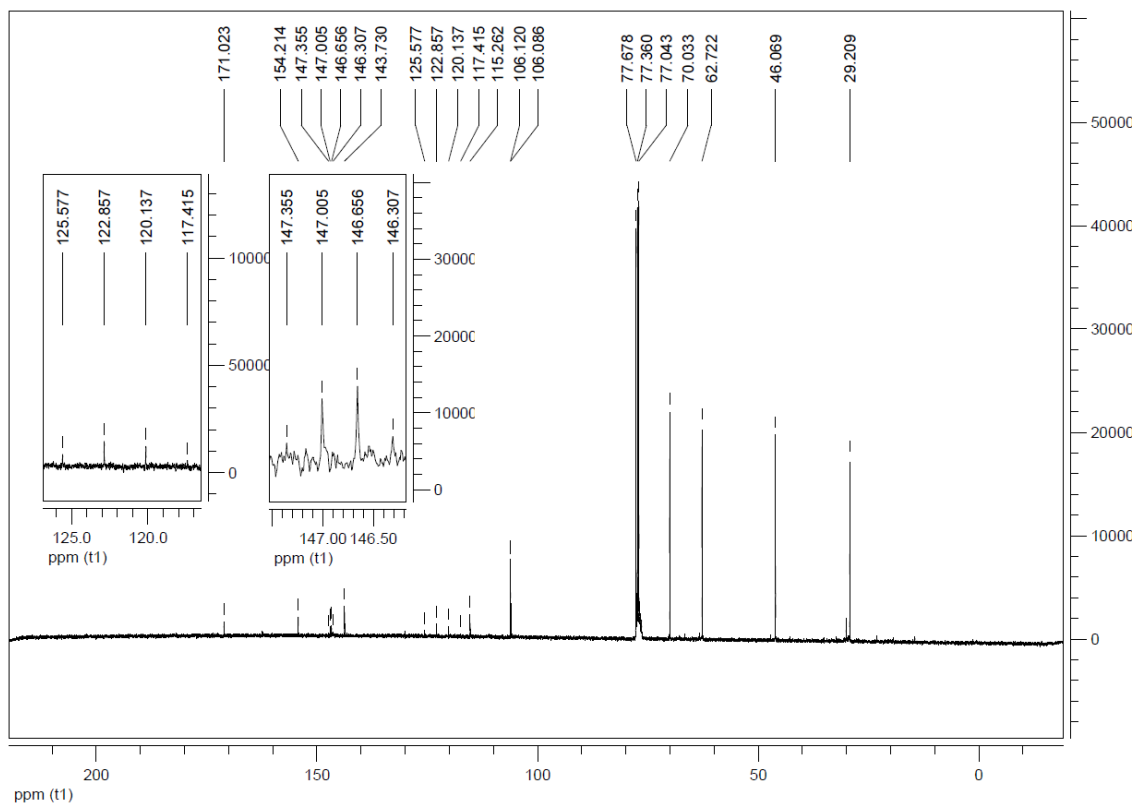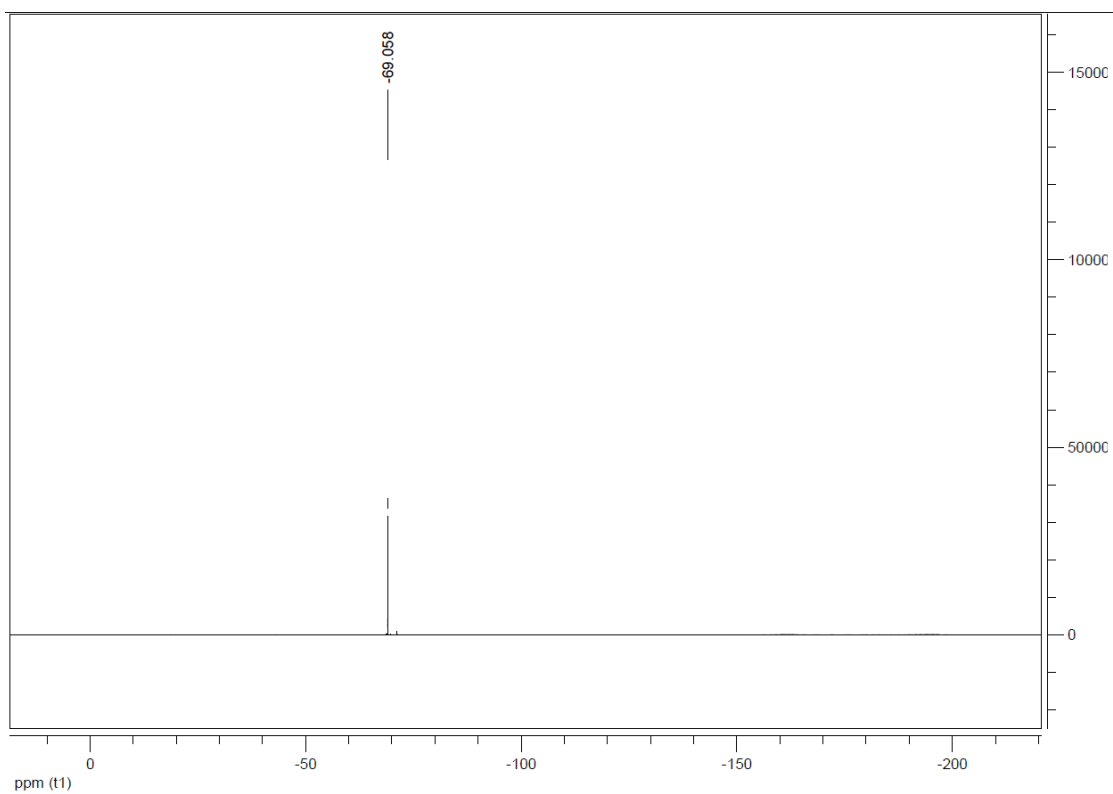

*N*-Methyl-*N*-(6-(trifluoromethyl)-2,3-dihydrofuro[2,3-*b*]pyridin-4-yl)methanesulfonamide (**4b**)

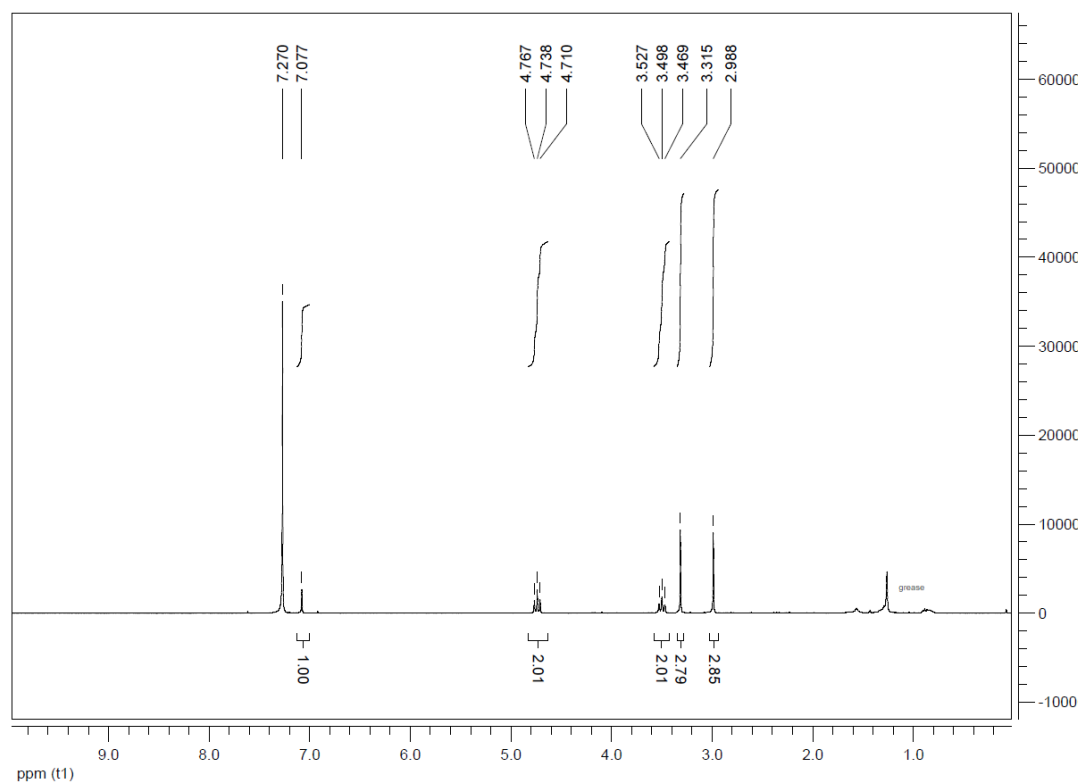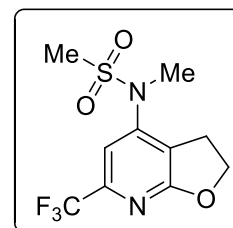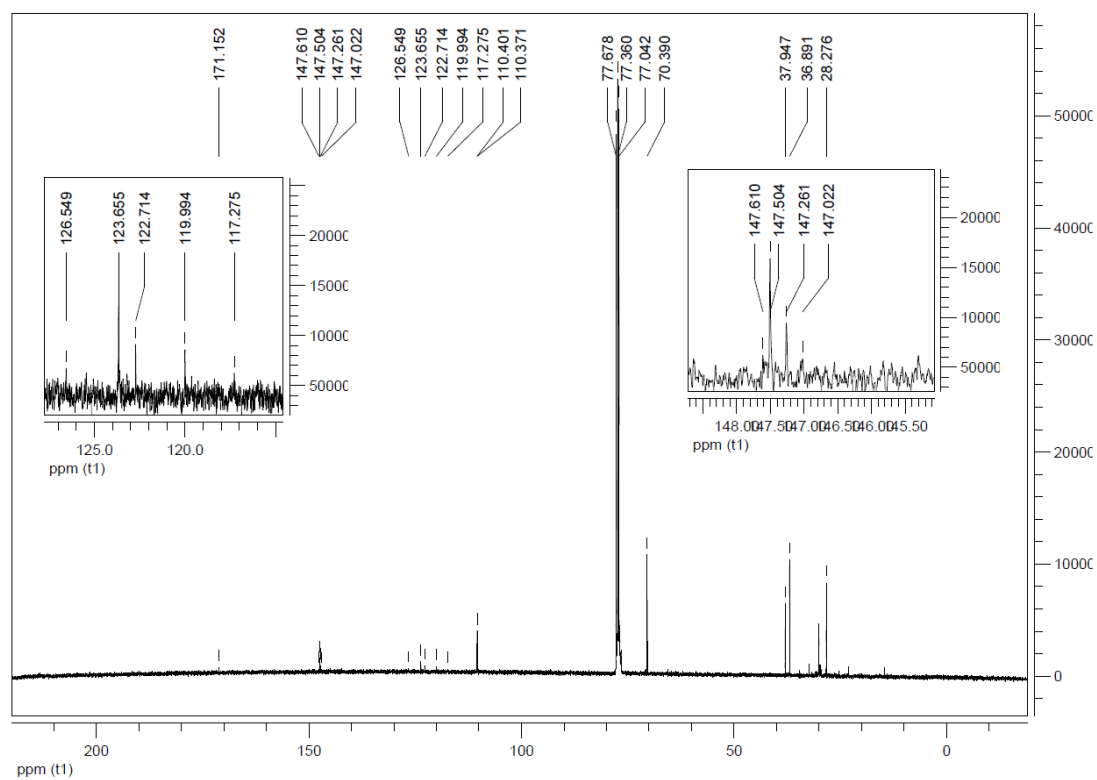

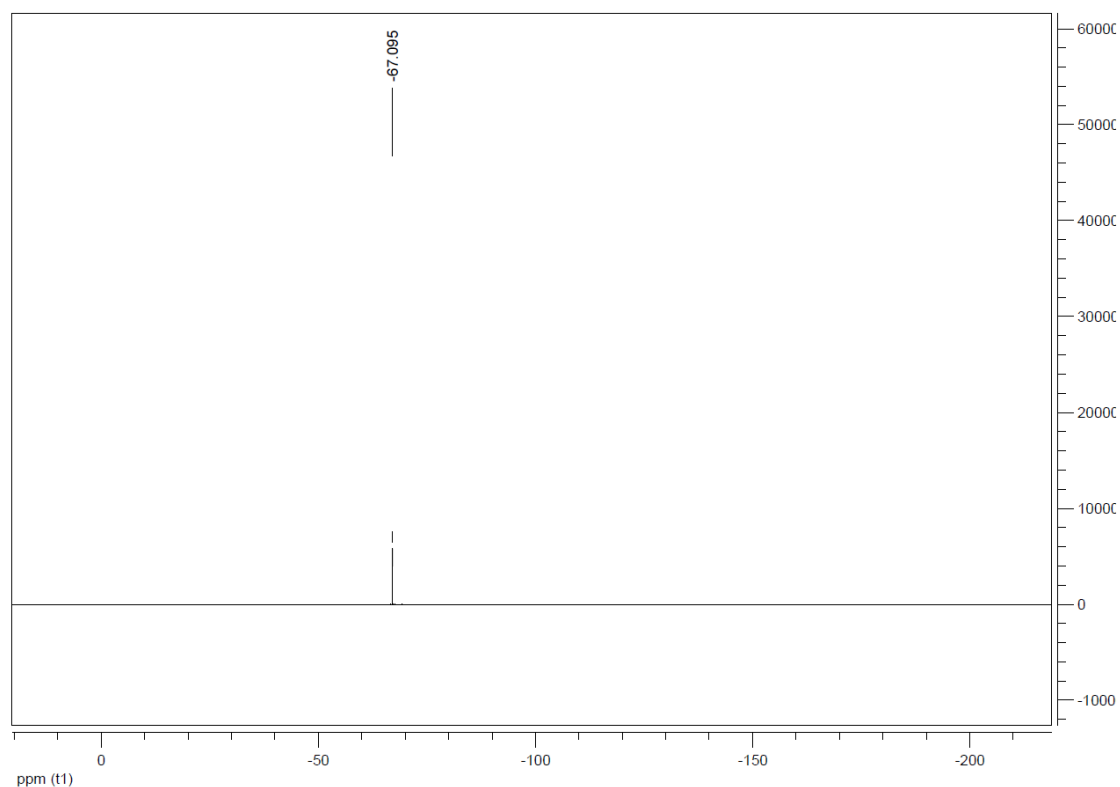

2-(4-([4-(Trifluoromethyl)pyrimidin-2-yl]oxy)but-1-yn-1-yl)-2-thiazolidine-1,1-dione (4c)

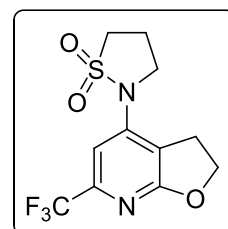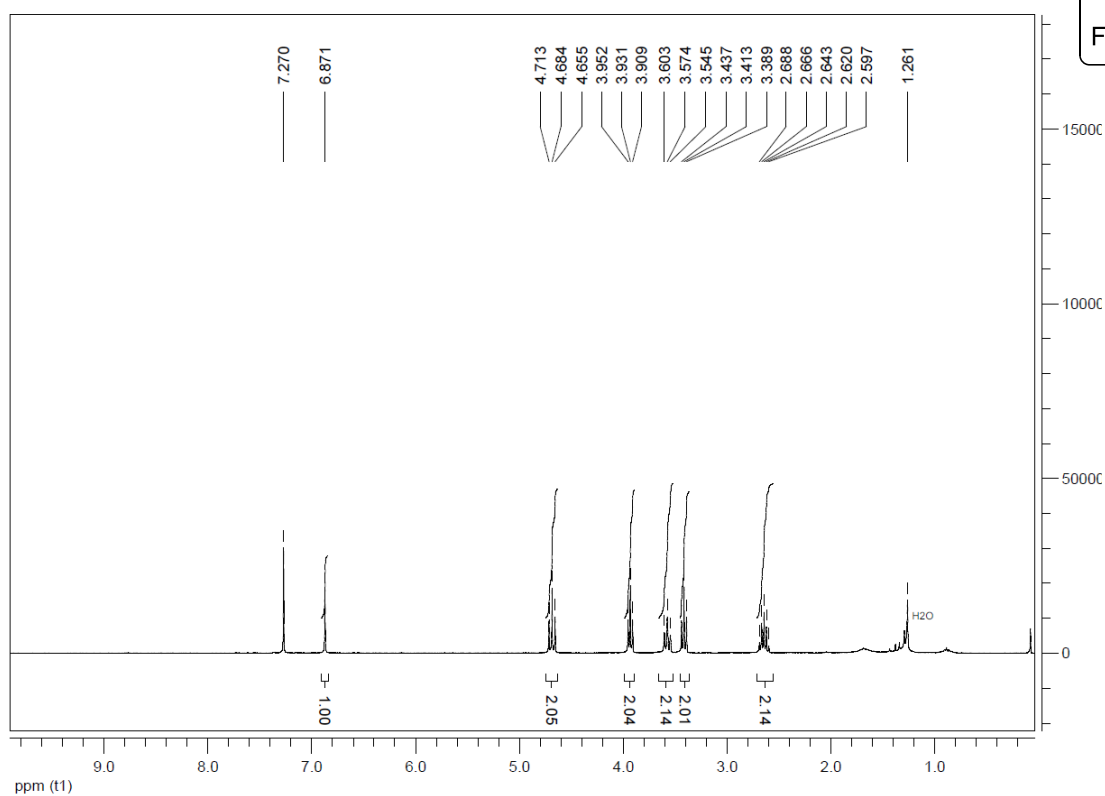

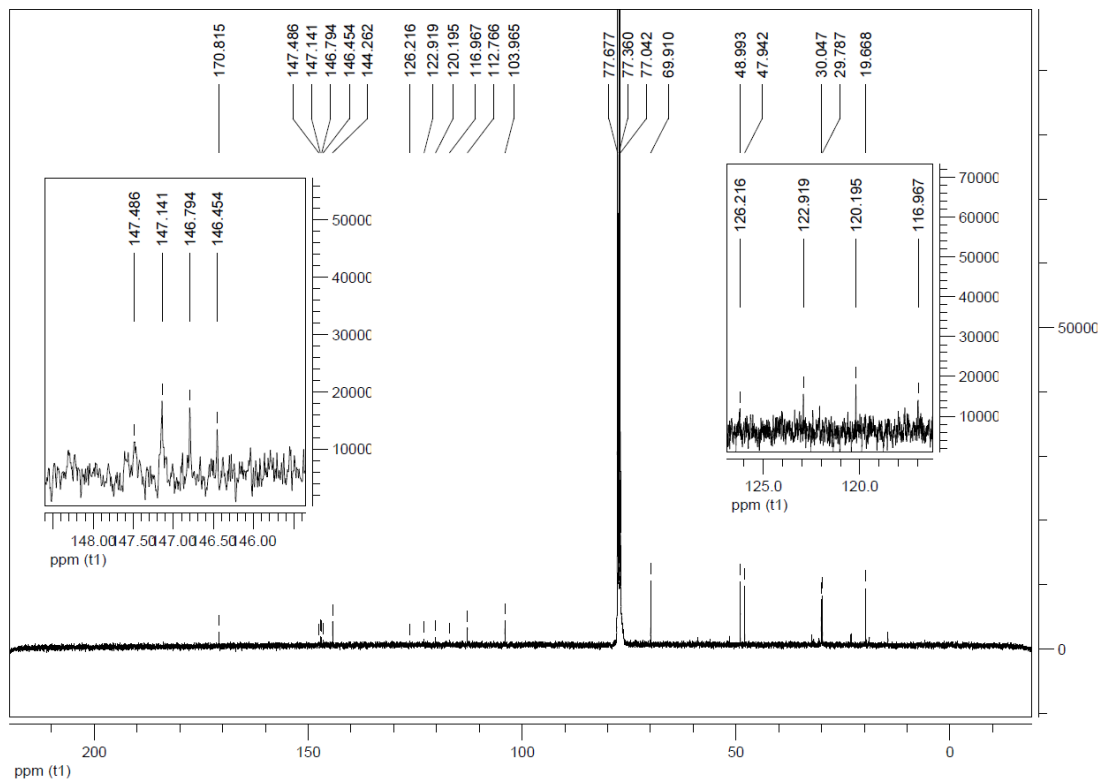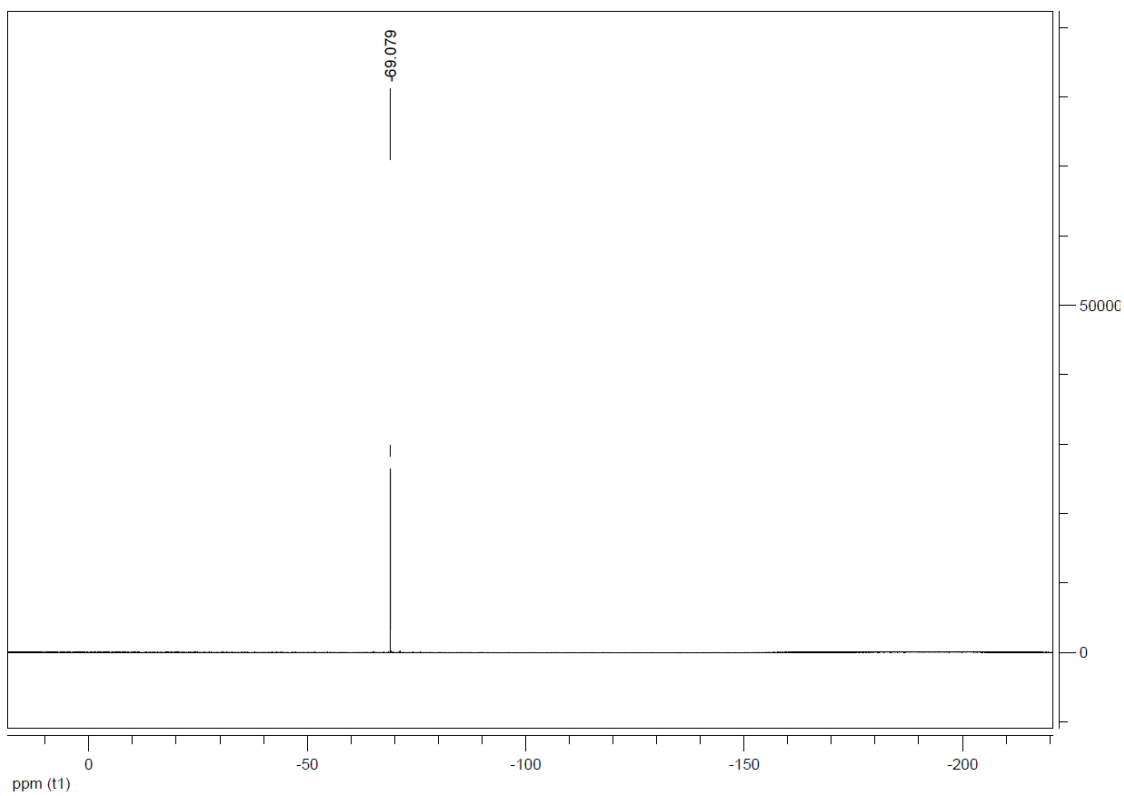

1-(6-(Trifluoromethyl)-2,3-dihydrofuro[2,3-b]pyridin-4-yl)azetidin-2-one (**4d**)

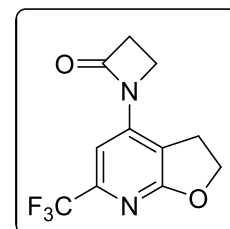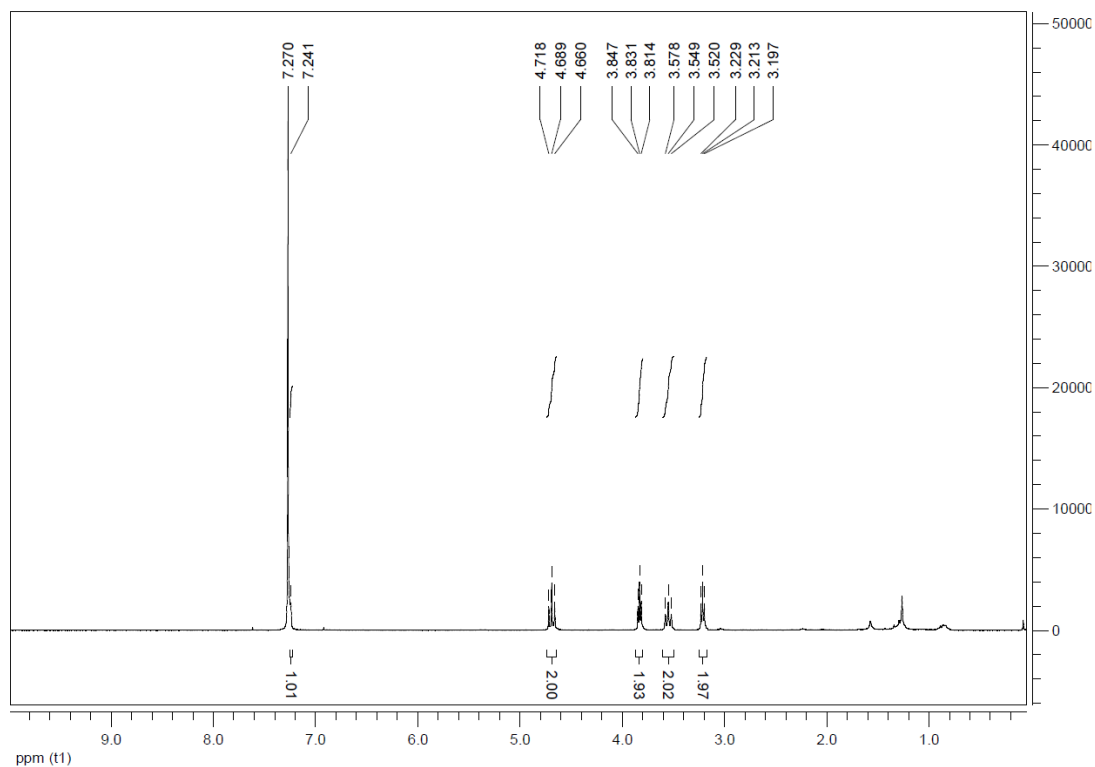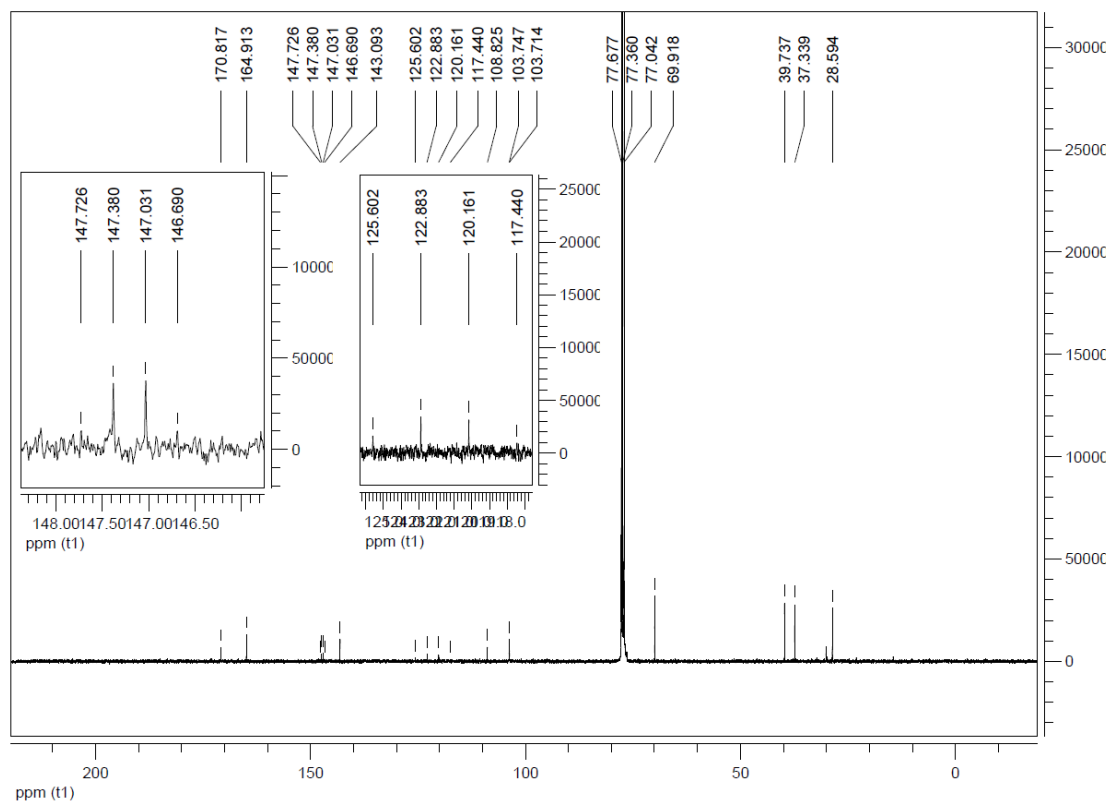

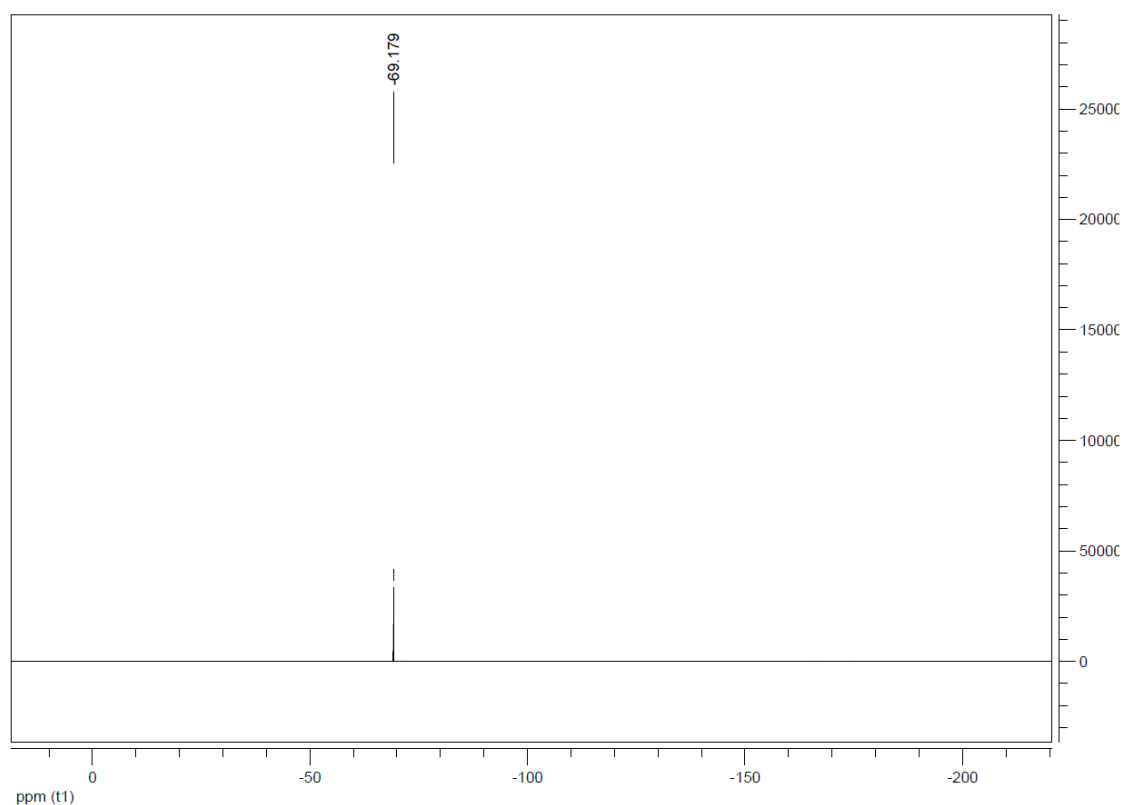

Methyl 1-(6-(trifluoromethyl)-2,3-dihydrofuro[2,3-b]pyridin-4-yl)-1H-indole-3-carboxylate (**4e**)

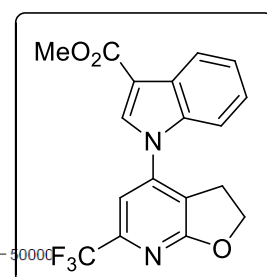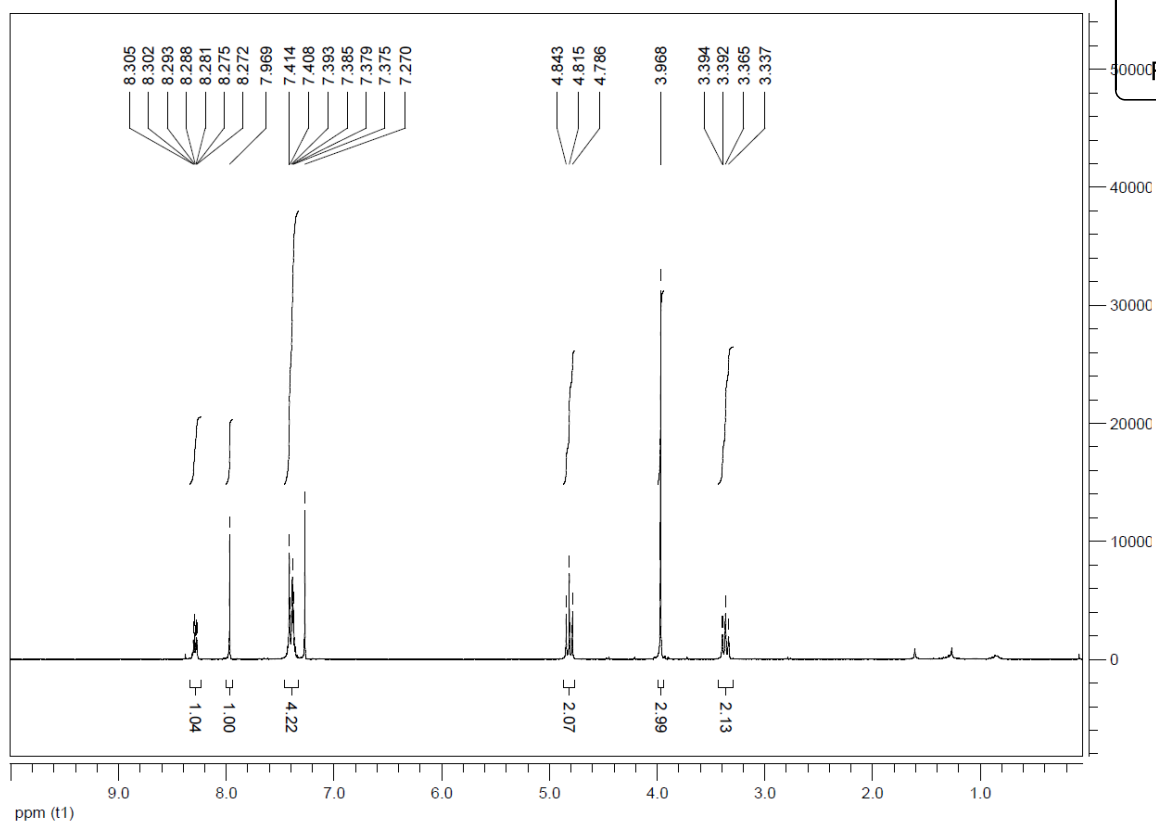



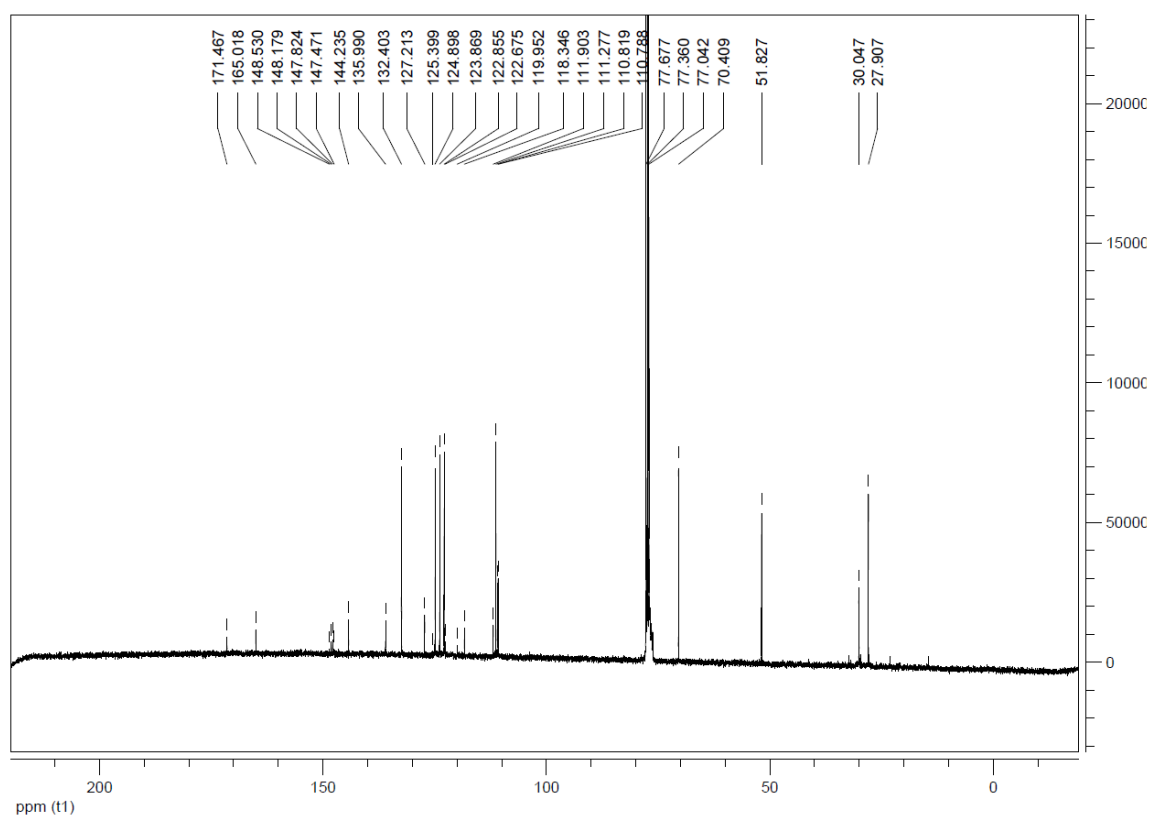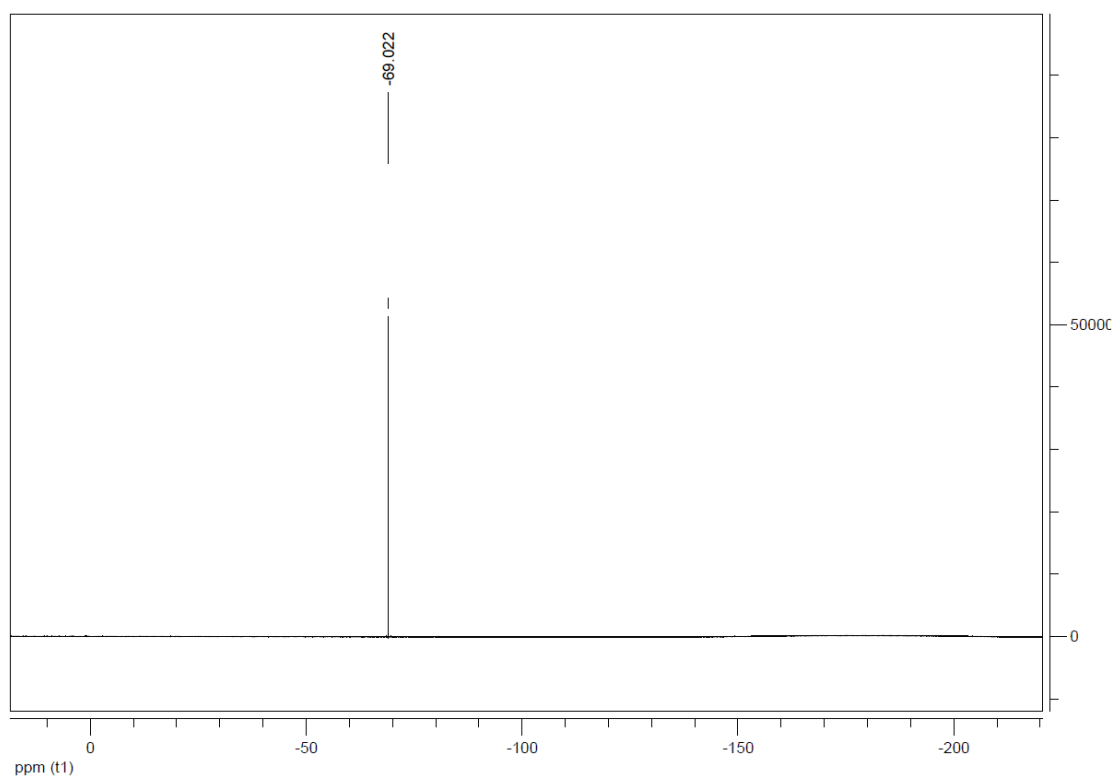

3-(5-Fluoro-2,3-dihydrofuro[2,3-b]pyridin-4-yl)oxazolidin-2-one (**4f**)

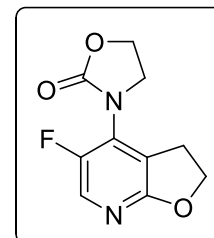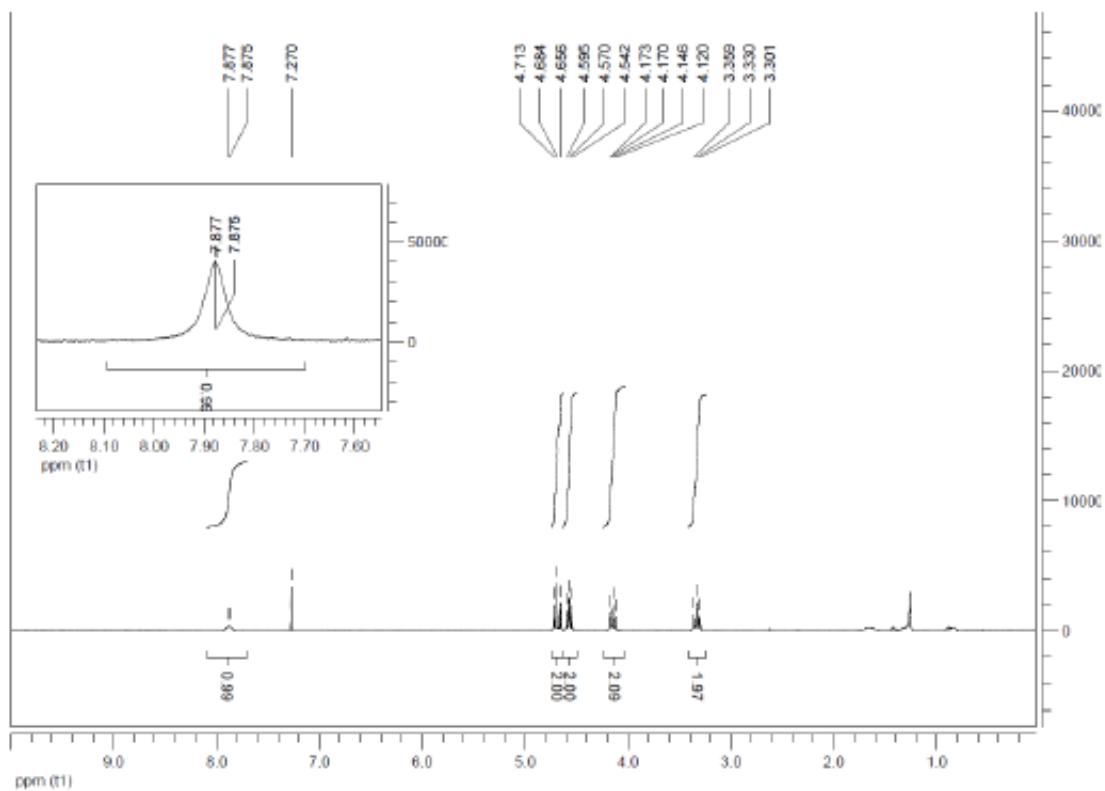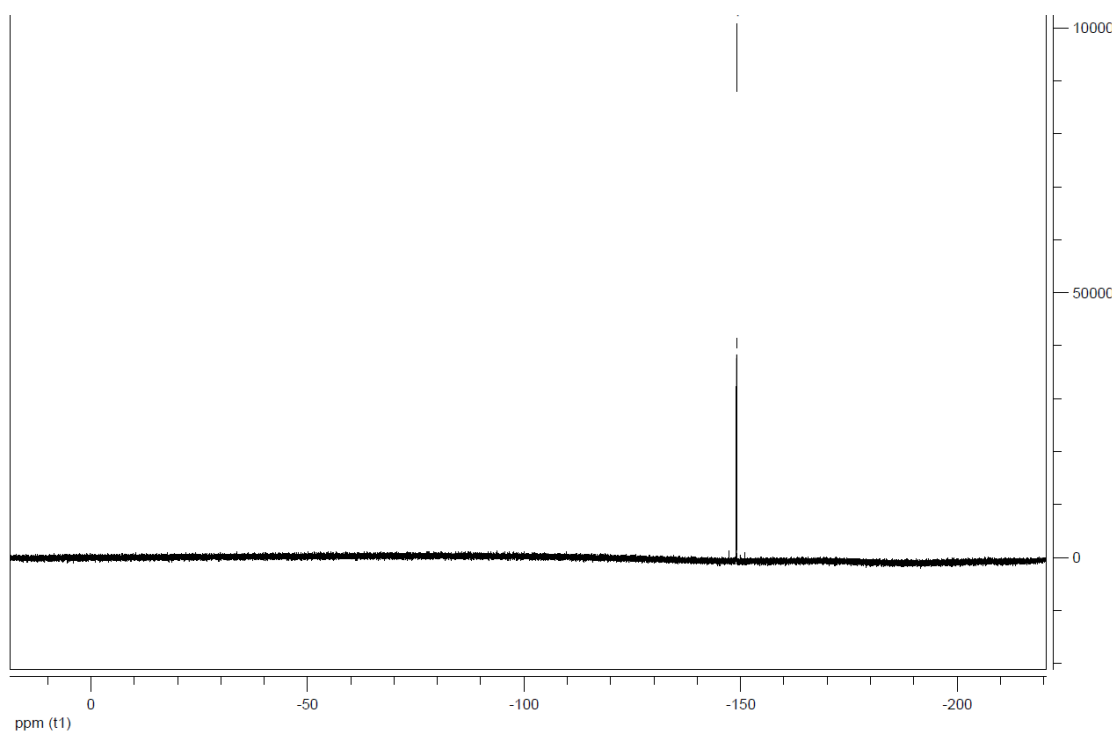

1-(5-Fluoro-2,3-dihydrofuro[2,3-b]pyridin-4-yl)azetidin-2-one (**4g**)

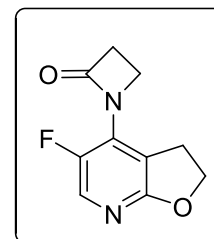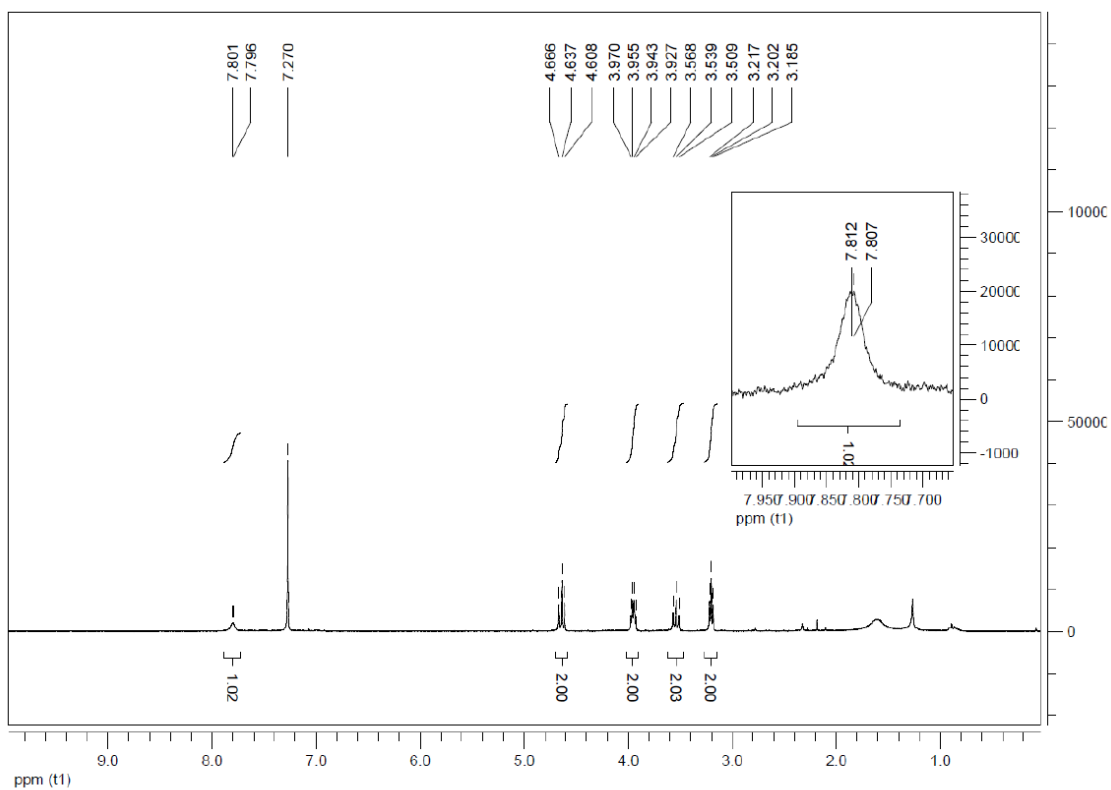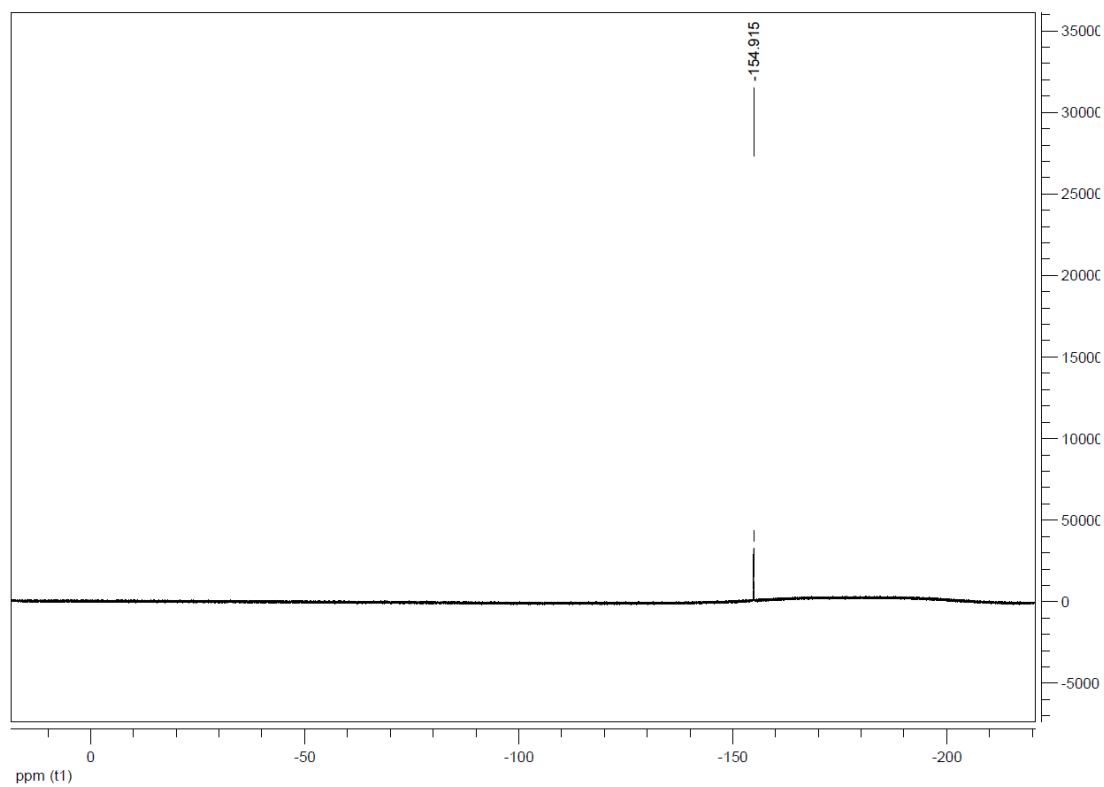

Methyl 1-(5-fluoro-2,3-dihydrofuro[2,3-b]pyridin-4-yl)-1H-indole-3-carboxylate (**4h**)

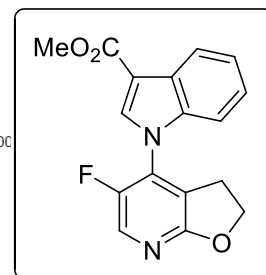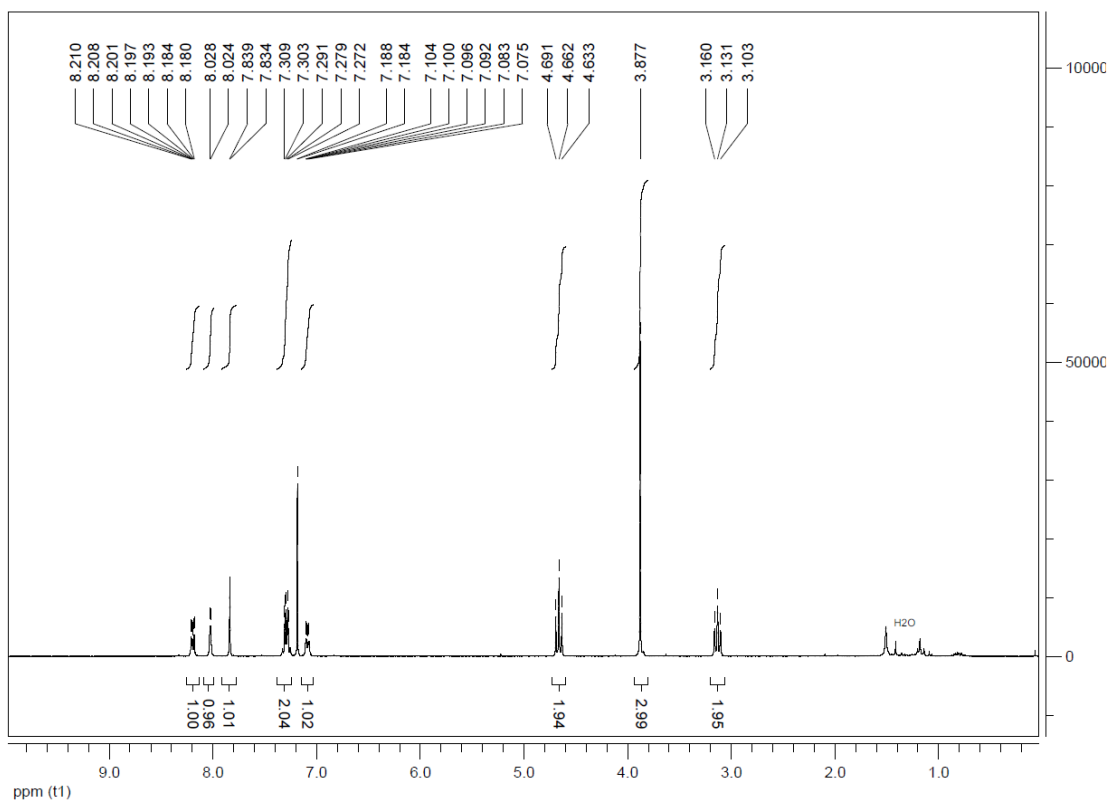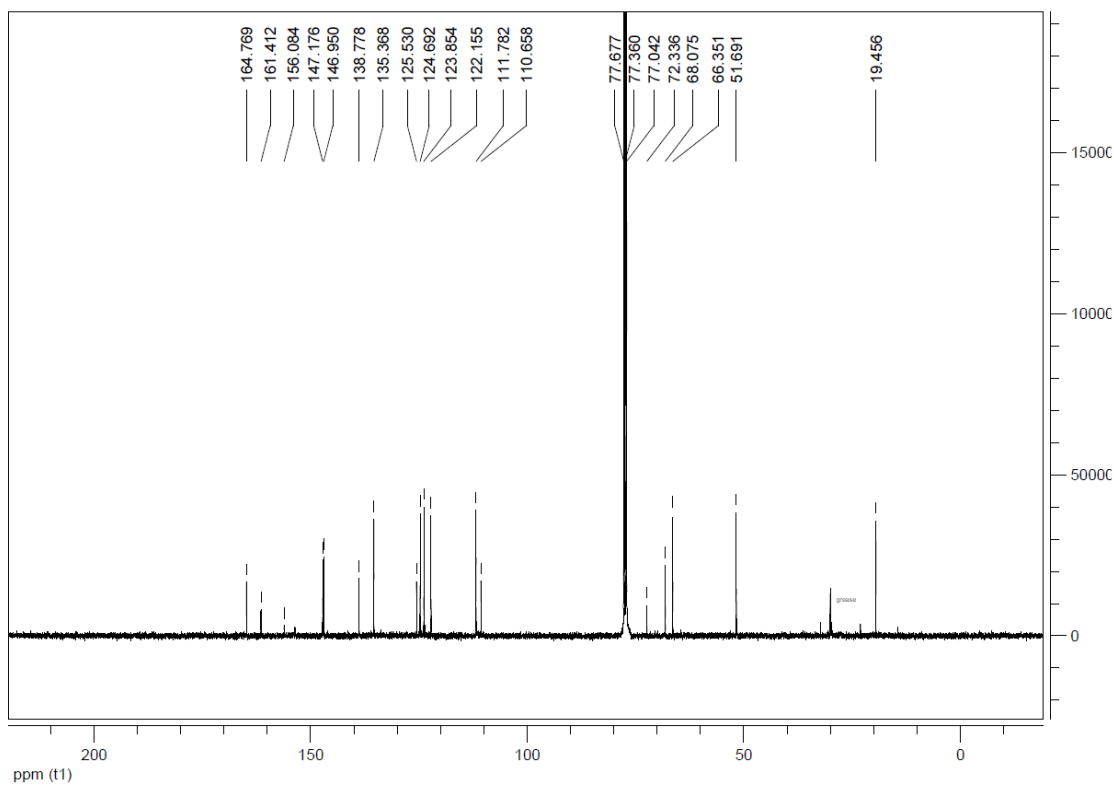

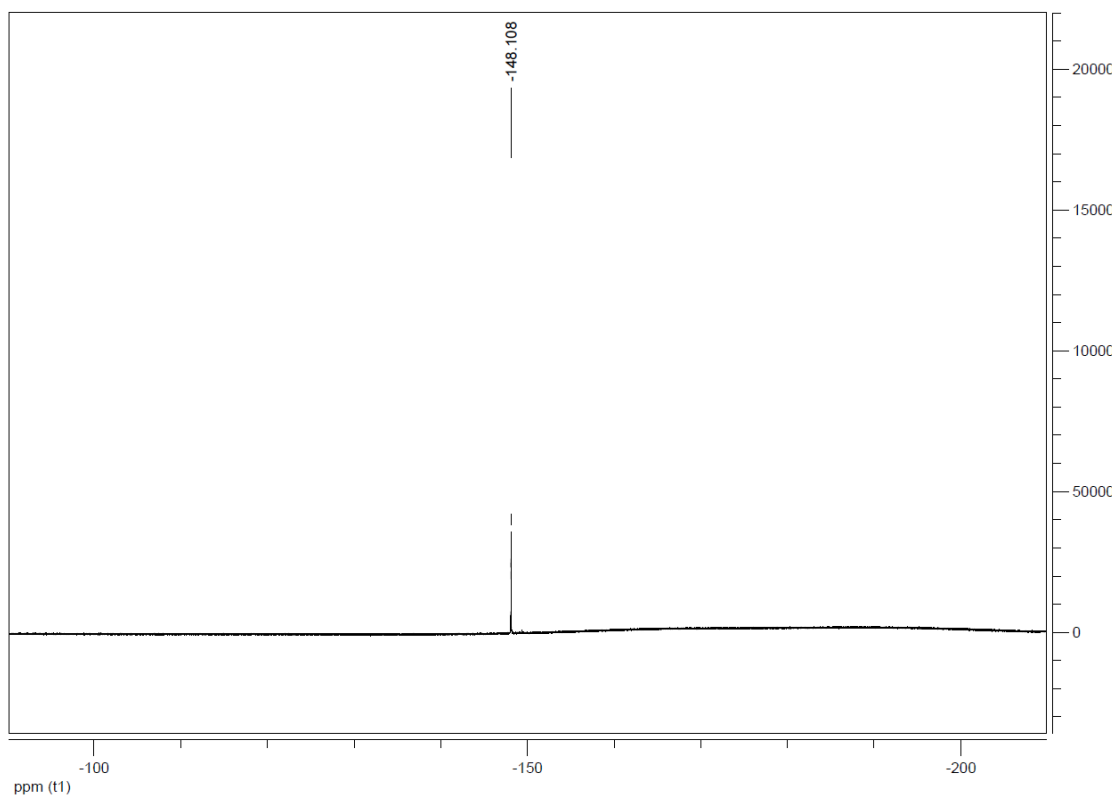

3-(5-Fluoro-6-(thiophen-3-yl)-2,3-dihydrofuro[2,3-b]pyridin-4-yl)oxazolidin-2-one (**4k**)

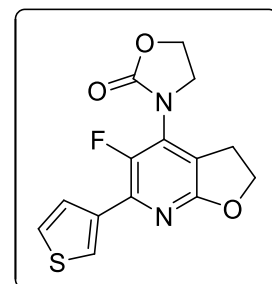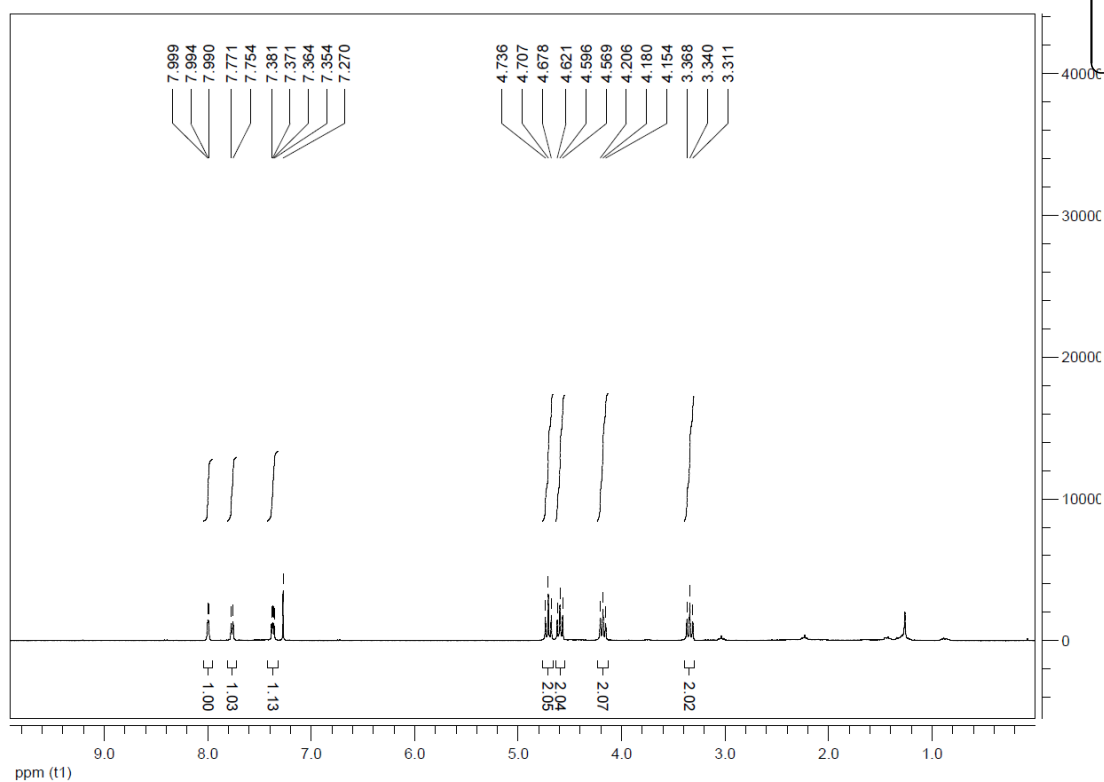

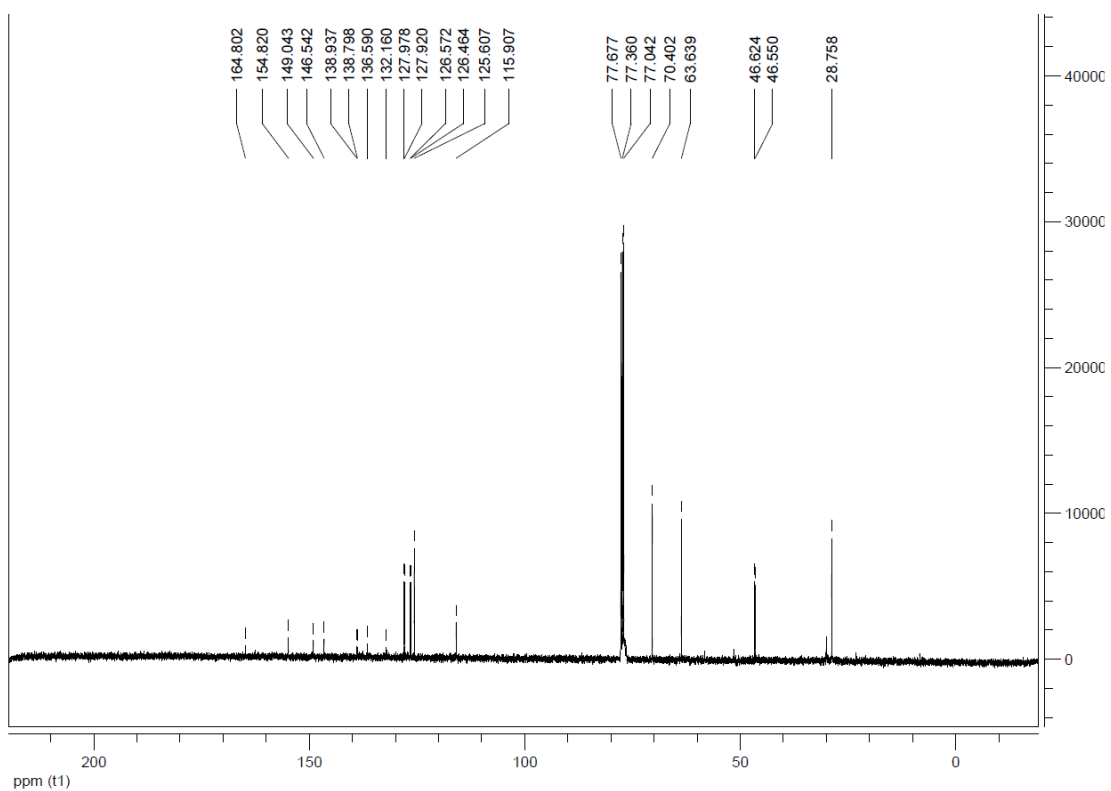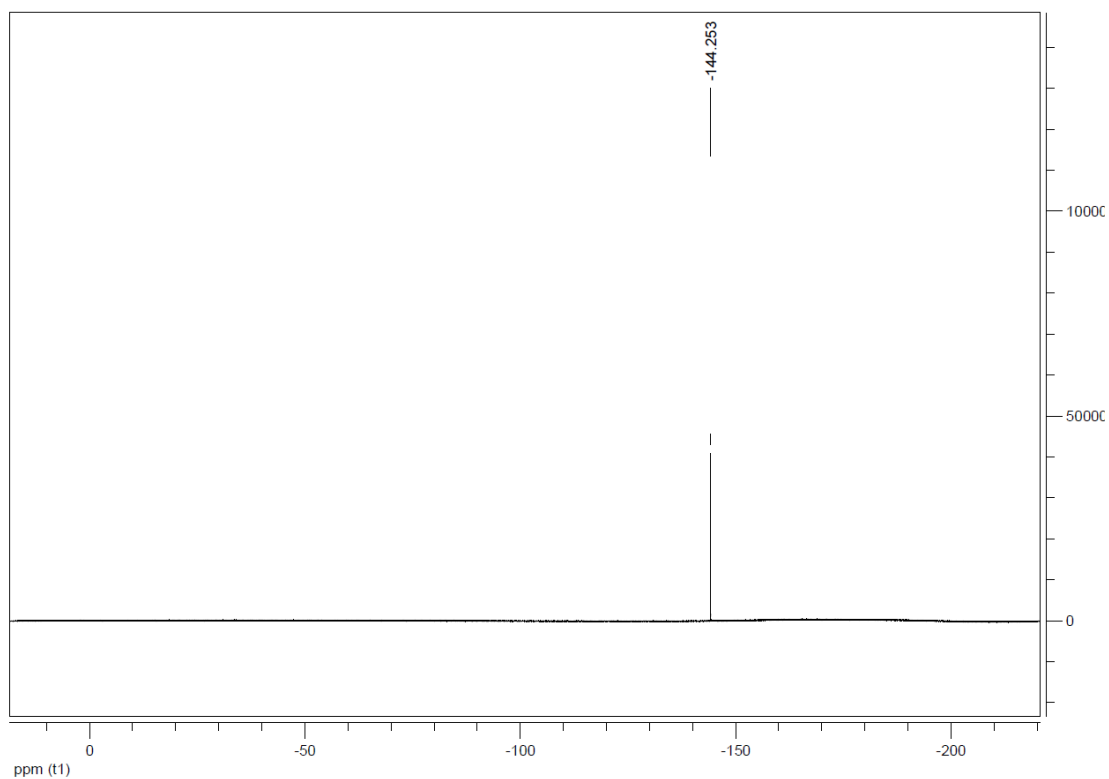

3-(5-fluoro-6-phenyl-2,3-dihydrofuro[2,3-b]pyridin-4-yl)oxazolidin-2-one (**4l**)

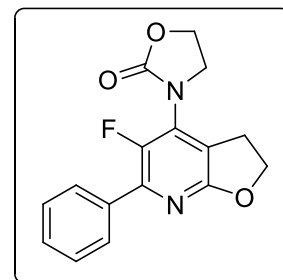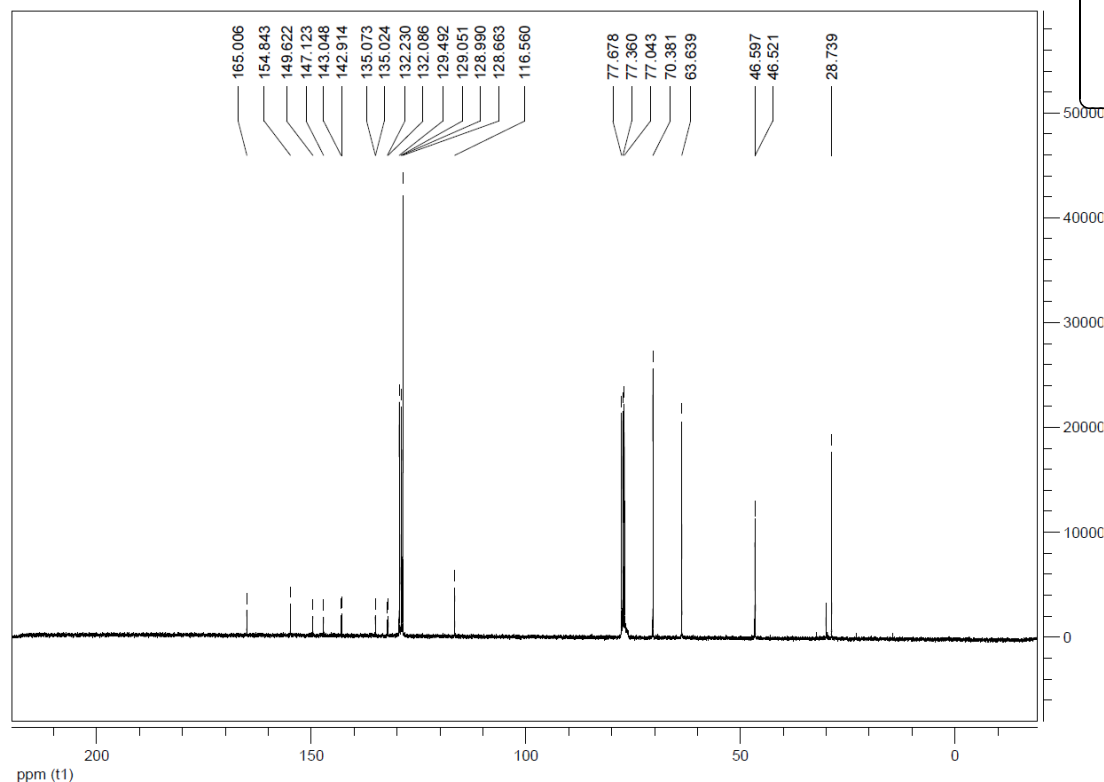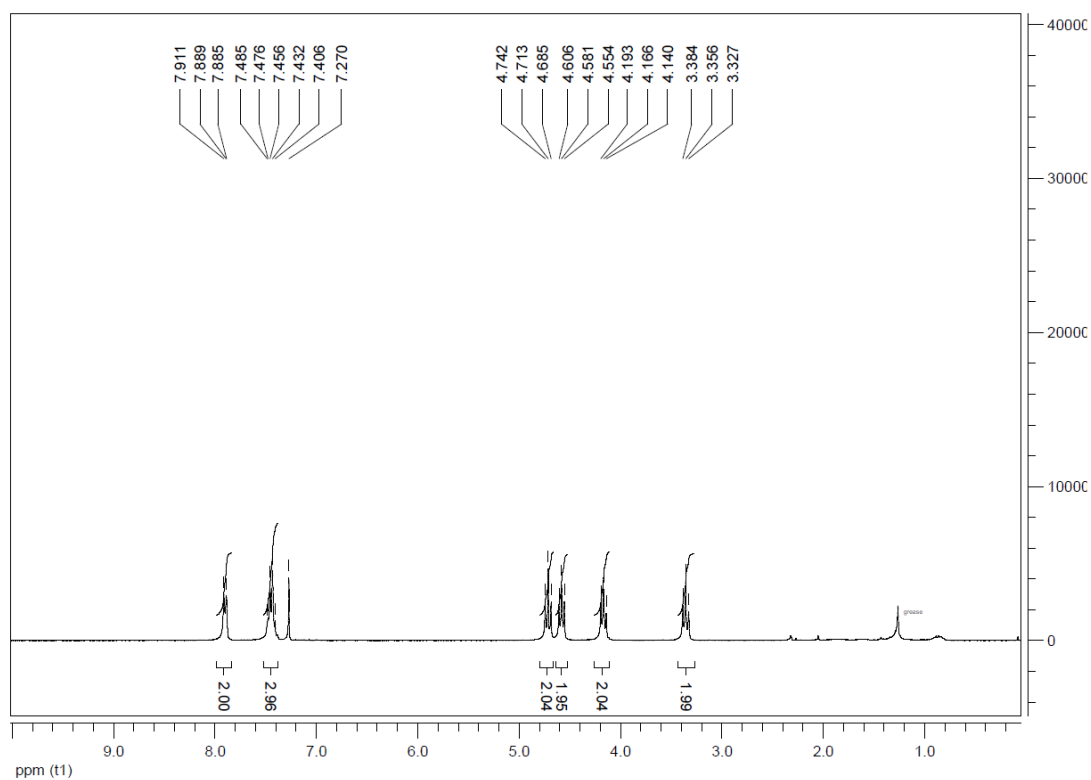

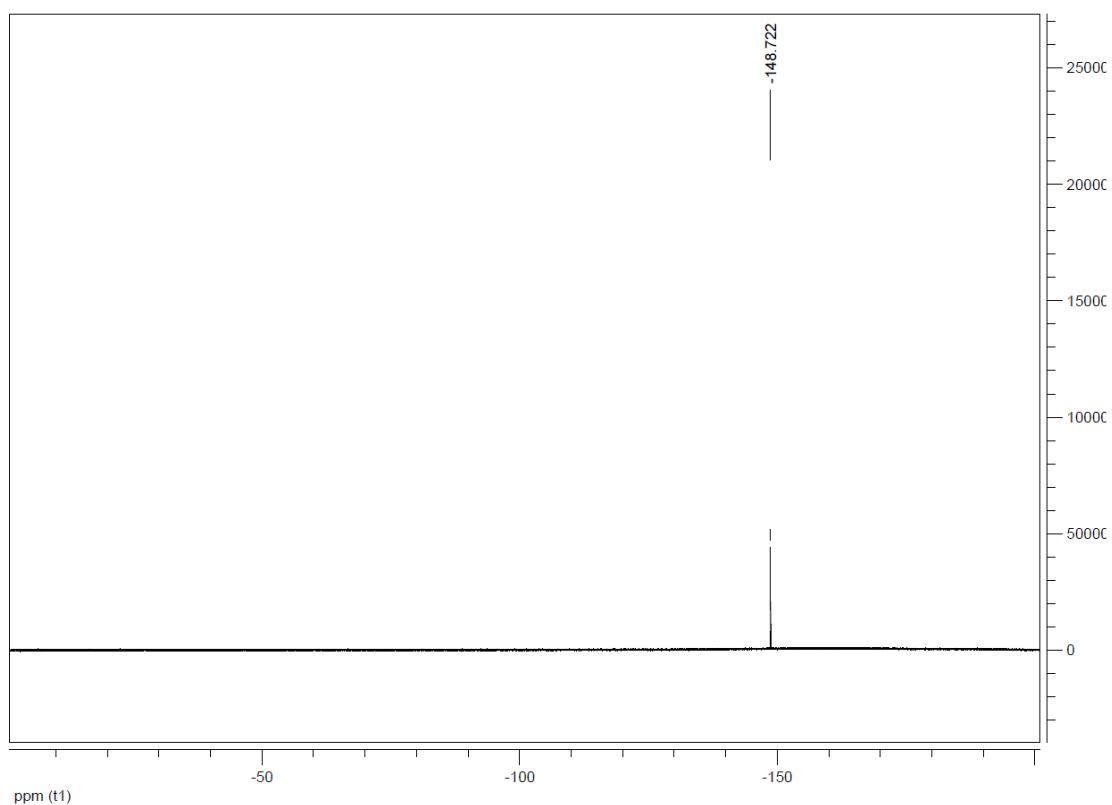

3-(5-Fluoro-6-(4-fluorophenyl)-2,3-dihydrofuro[2,3-b]pyridin-4-yl)oxazolidin-2-one (4m)

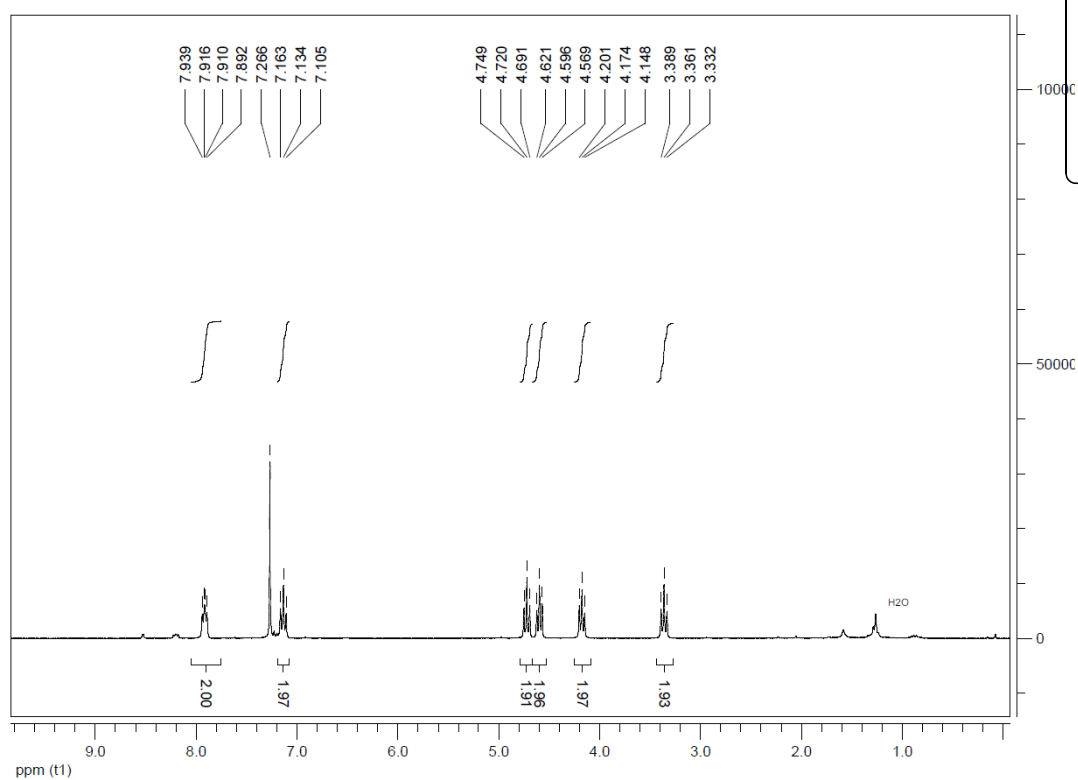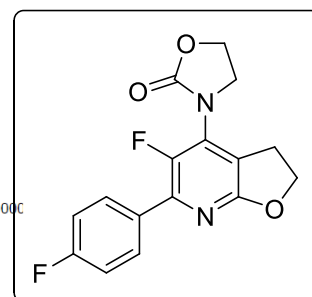



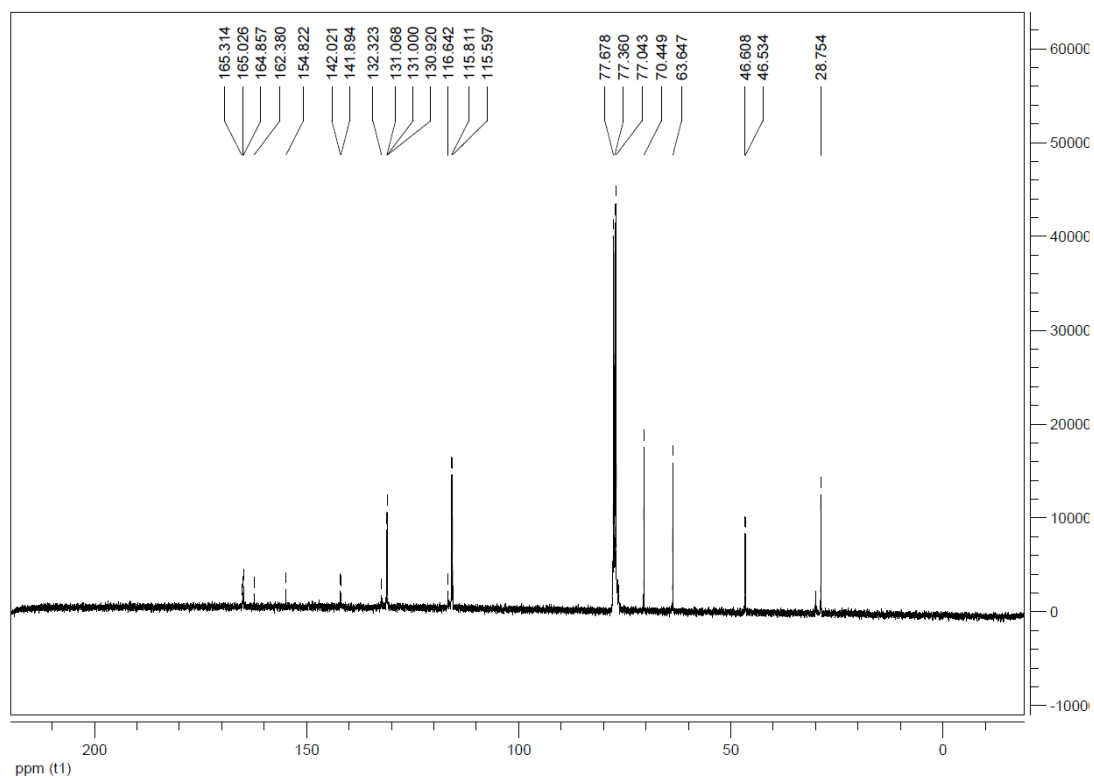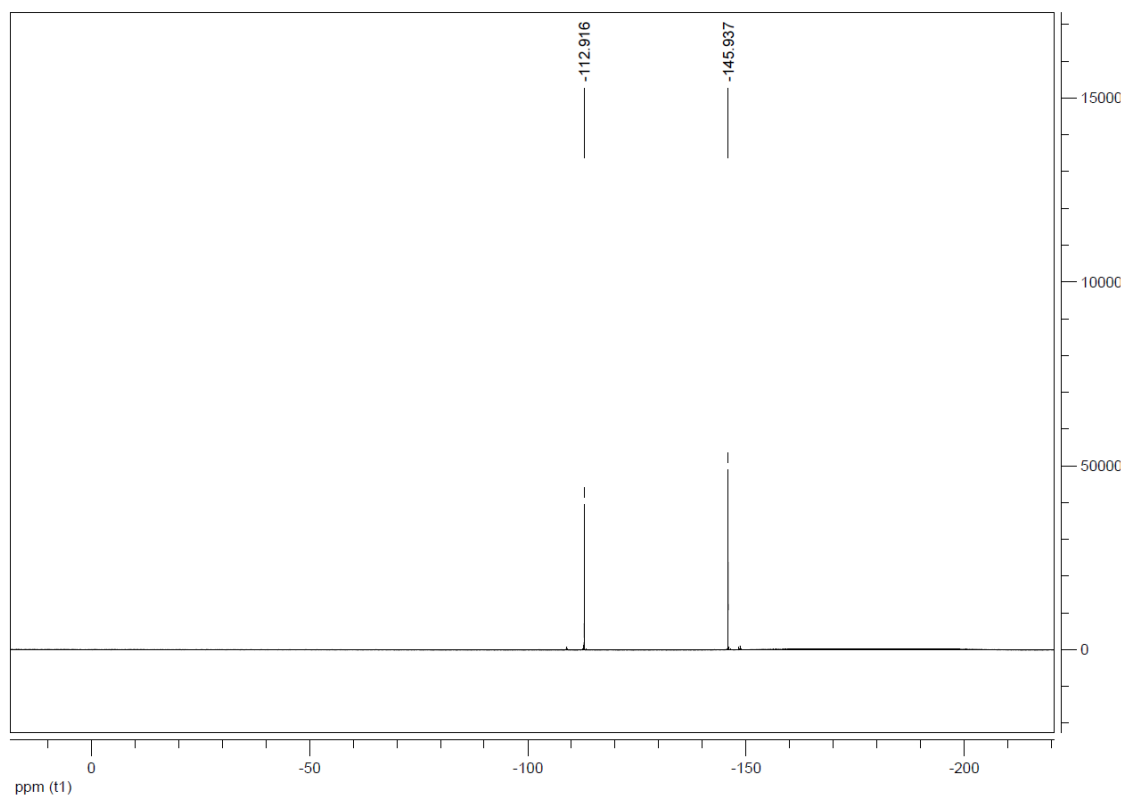

3-(2-(Trifluoromethyl)-4b,5,6,7,8,8a-hexahydrobenzofuro[2,3-b]pyridin-4-yl)oxazolidin-2-one (**4p**)

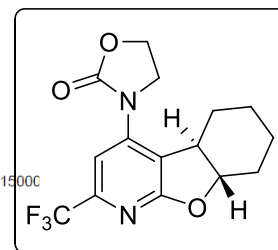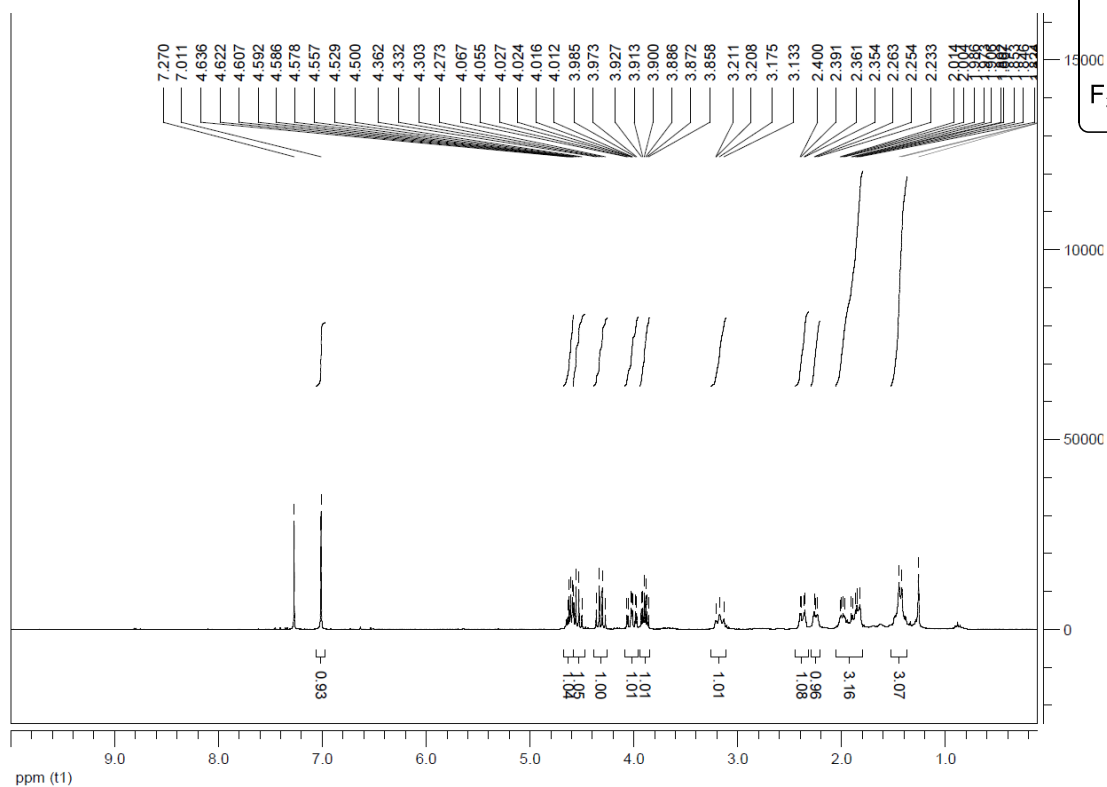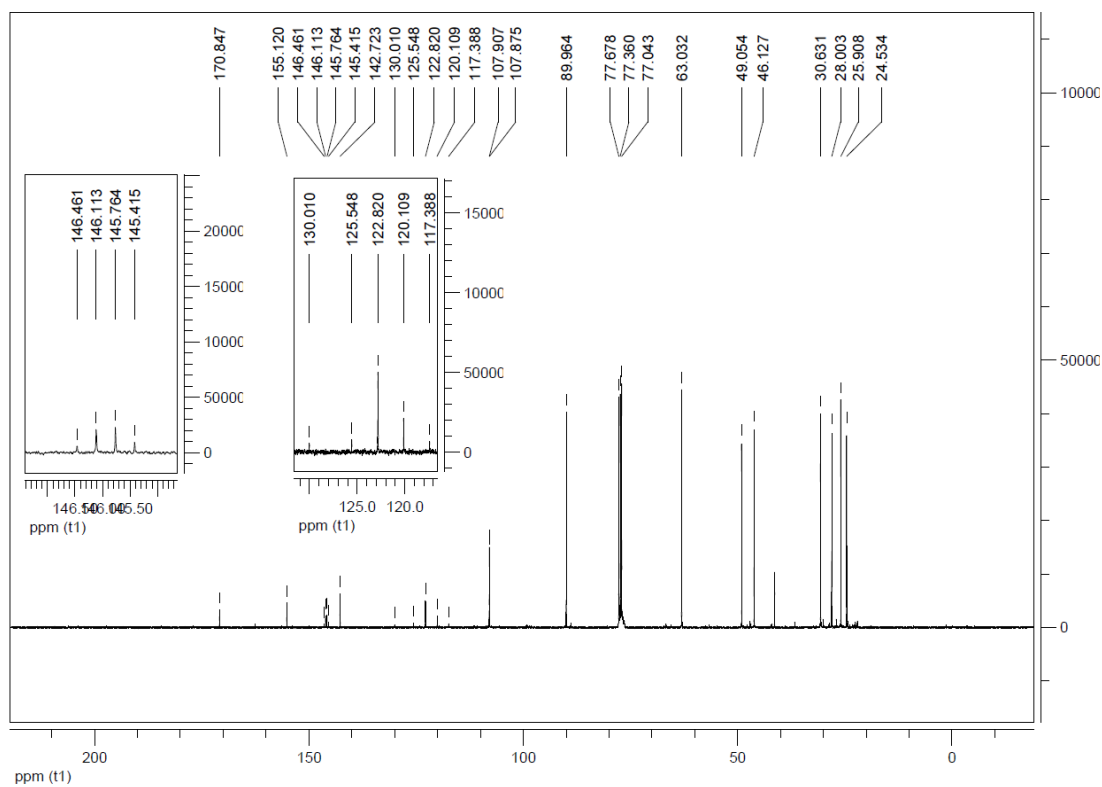

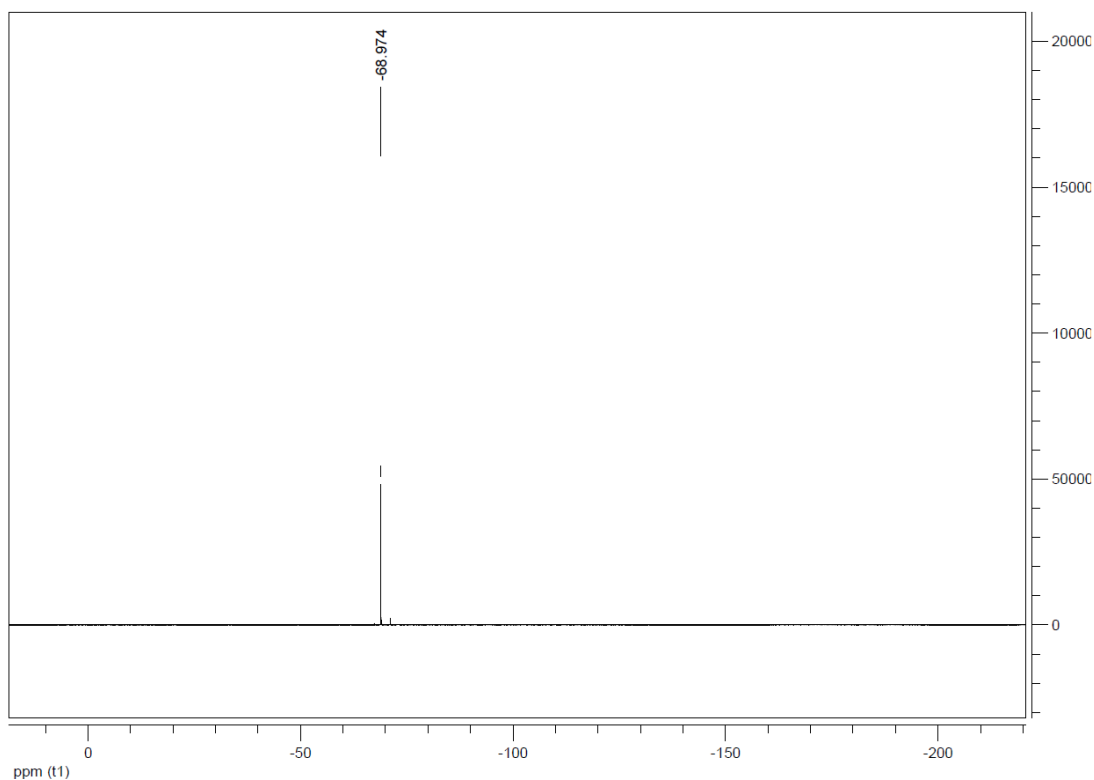

1-(2-(Trifluoromethyl)-4b,5,6,7,8,8a-hexahydrobenzofuro[2,3-b]pyridin-4-yl)azetidin-2-one (**4q**)

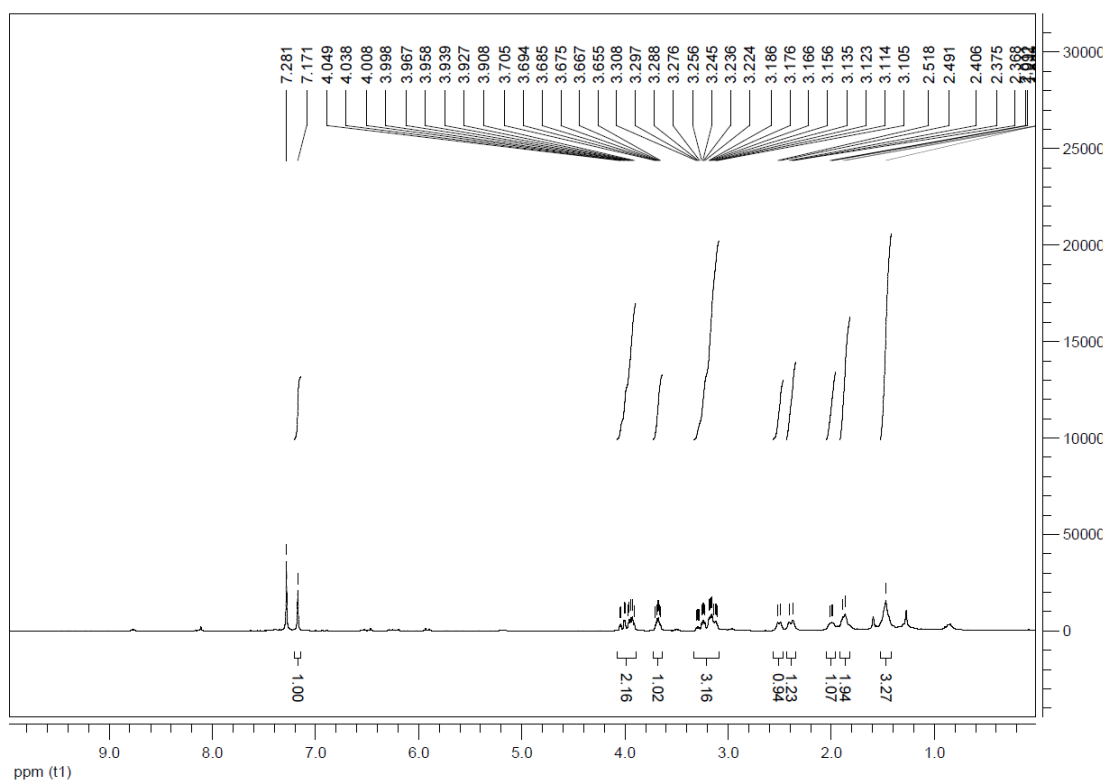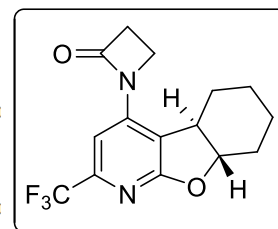

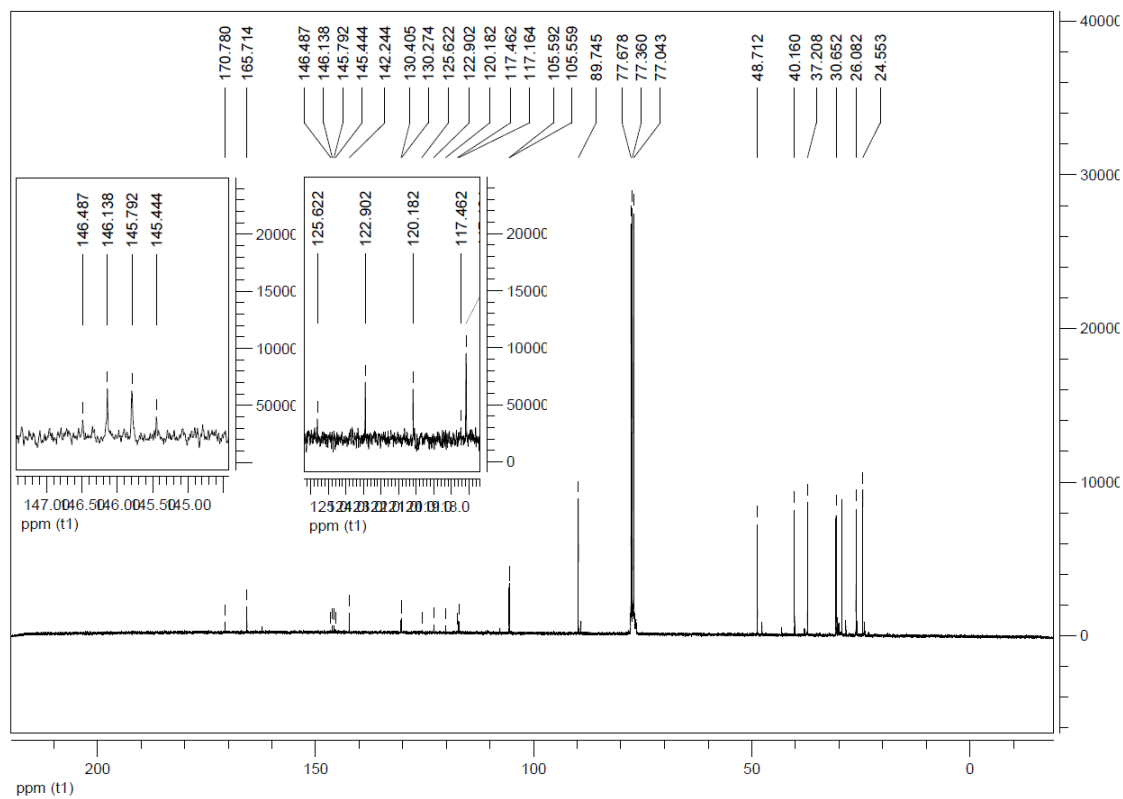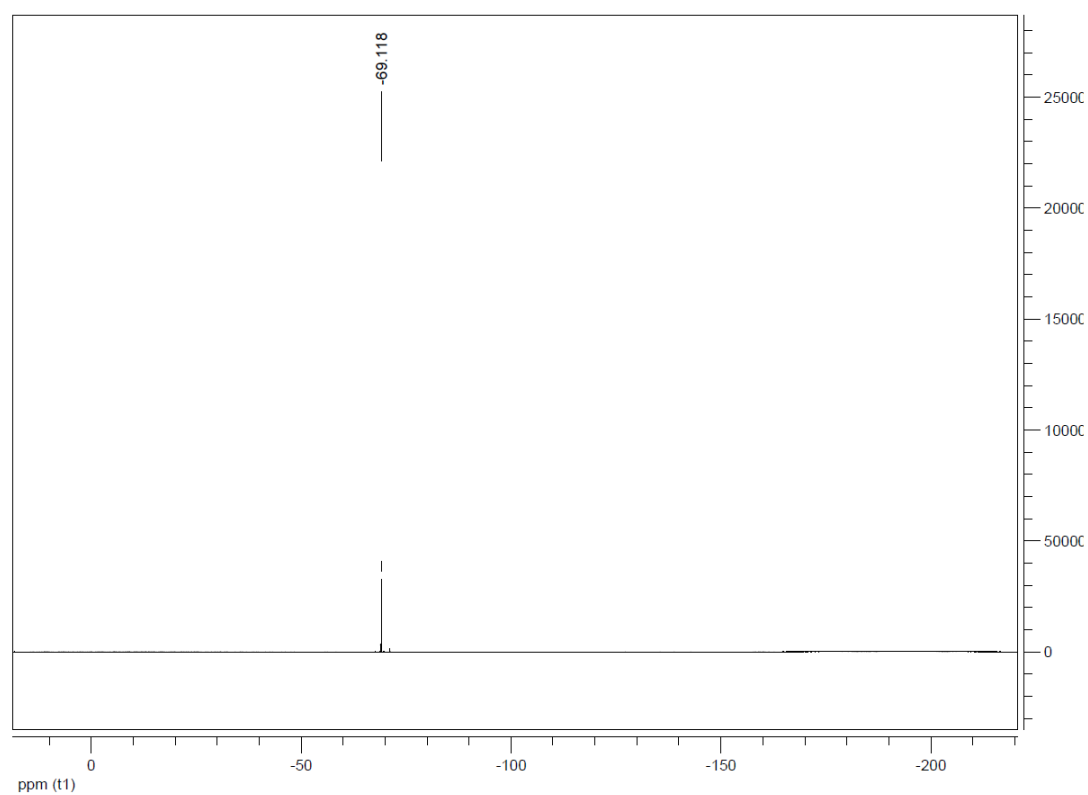

3-(6'-(Trifluoromethyl)-3'H-spiro[cyclobutane-1,2'-furo[2,3-b]pyridine]-4'-yl)oxazolidin-2-one (**4r**)

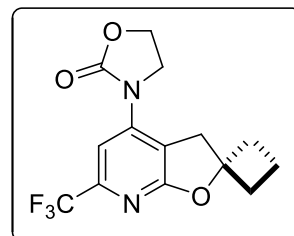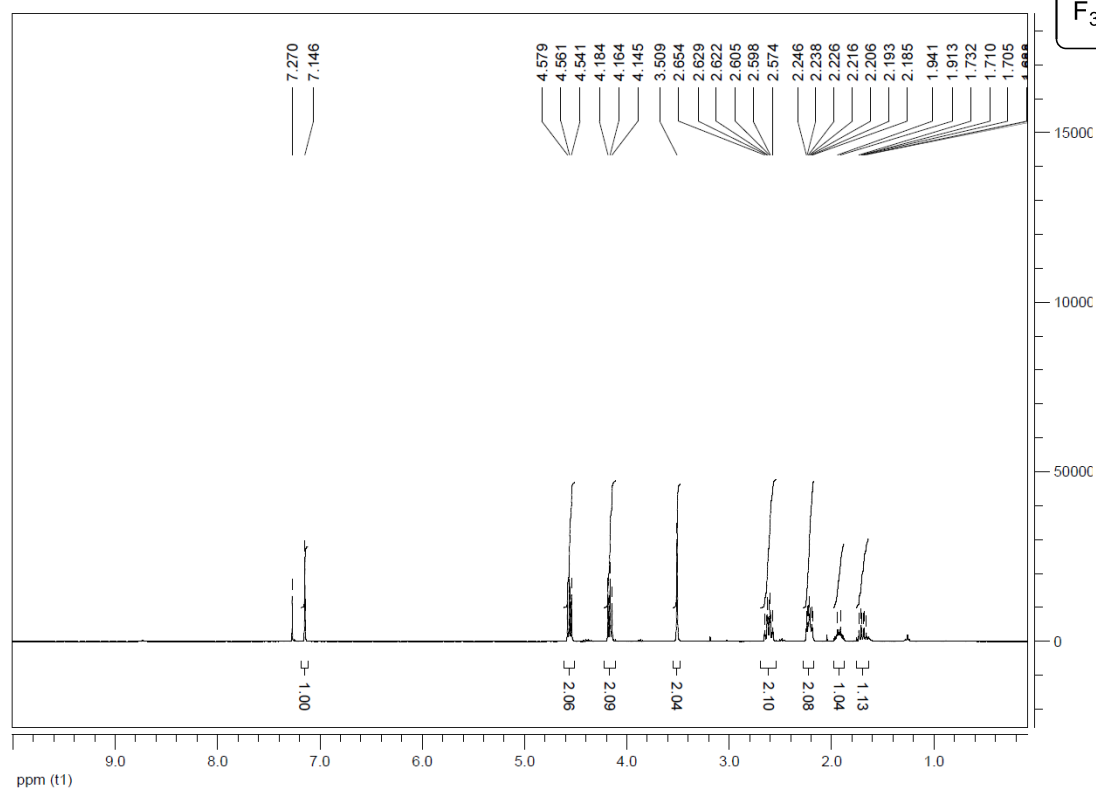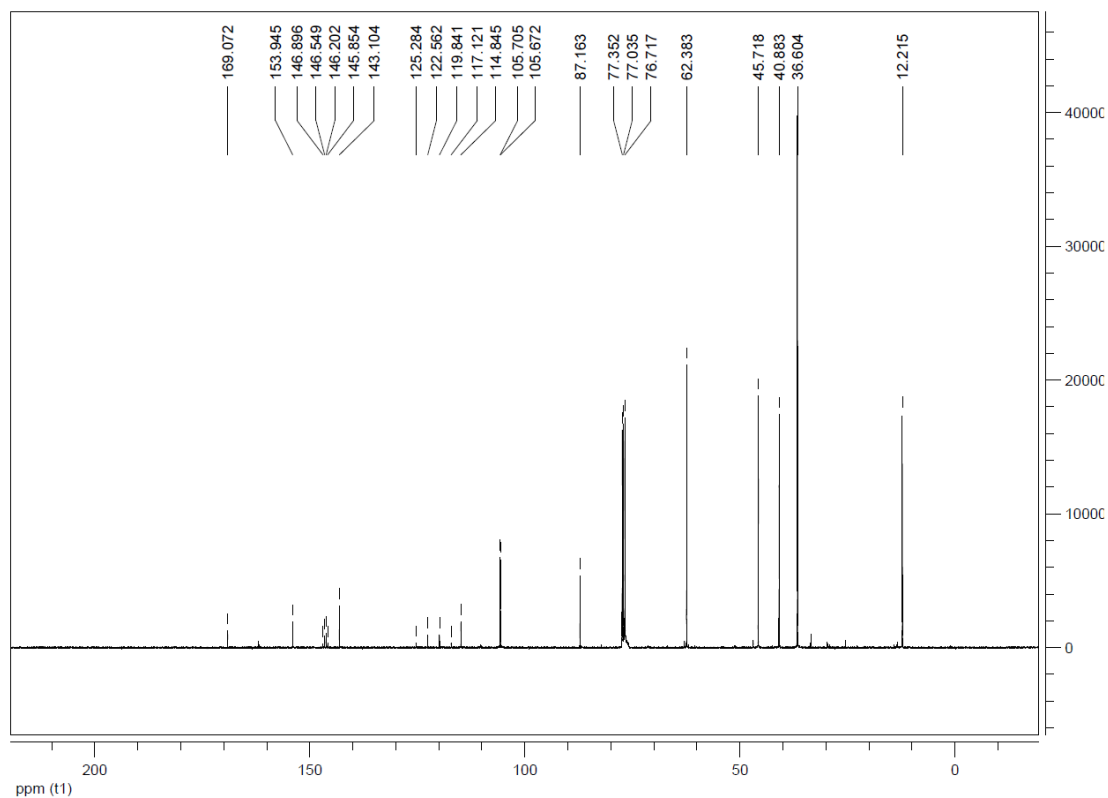

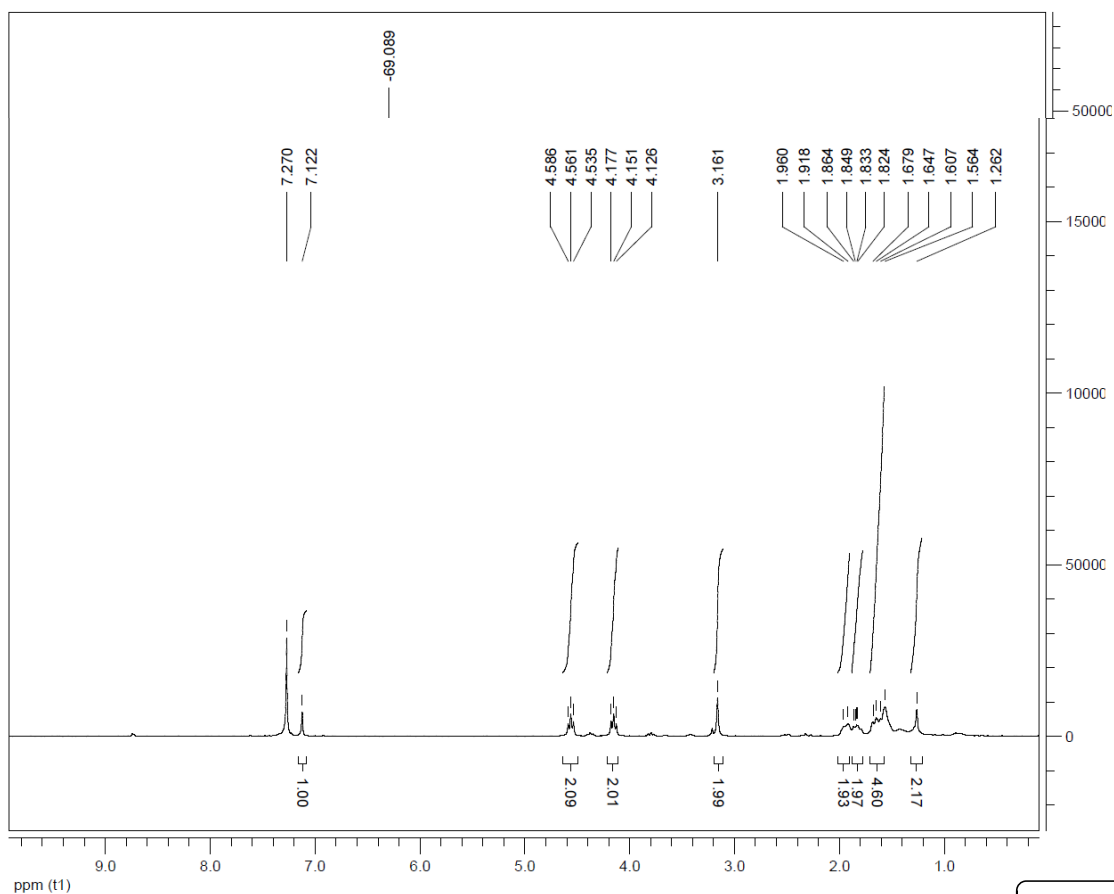

3-(6'-(Trifluoromethyl)-3'H-spiro[cyclohexane-1,2'-furo[2,3-b]pyridine]-4'-yl)oxazolidin-2-one  
(**4s**)

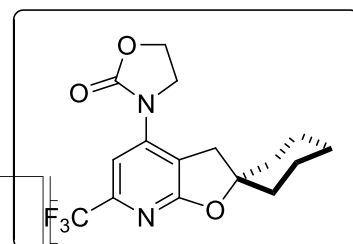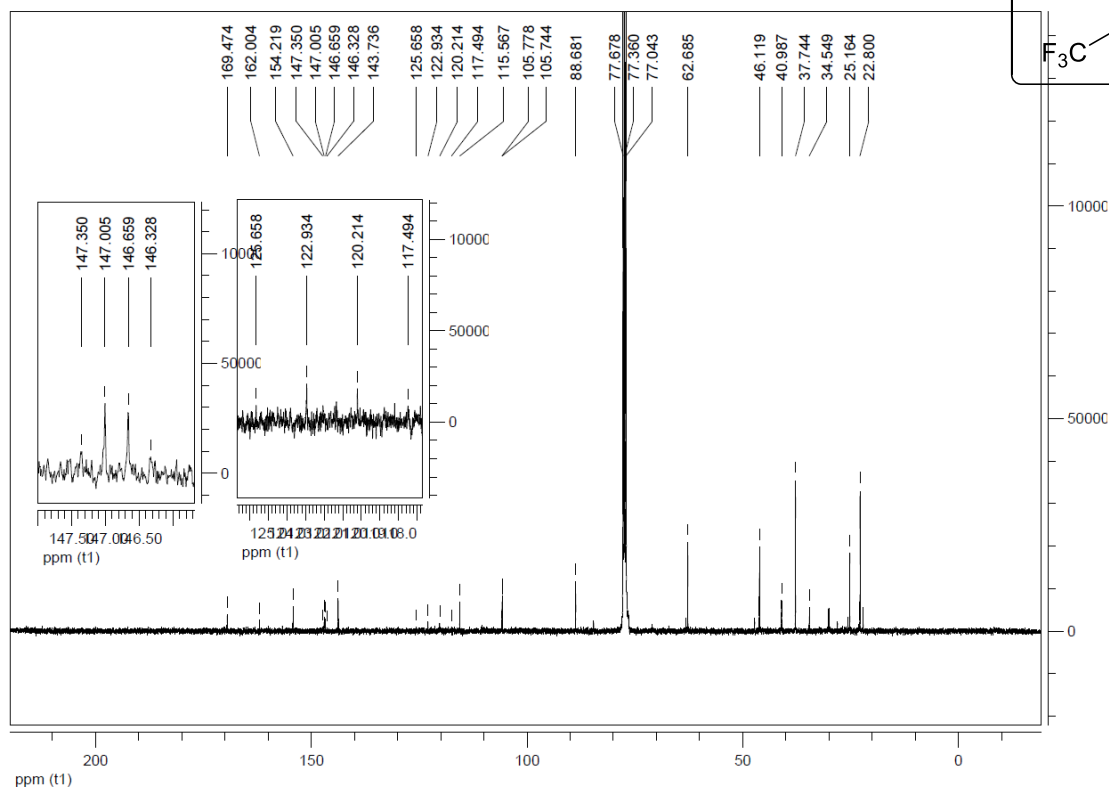

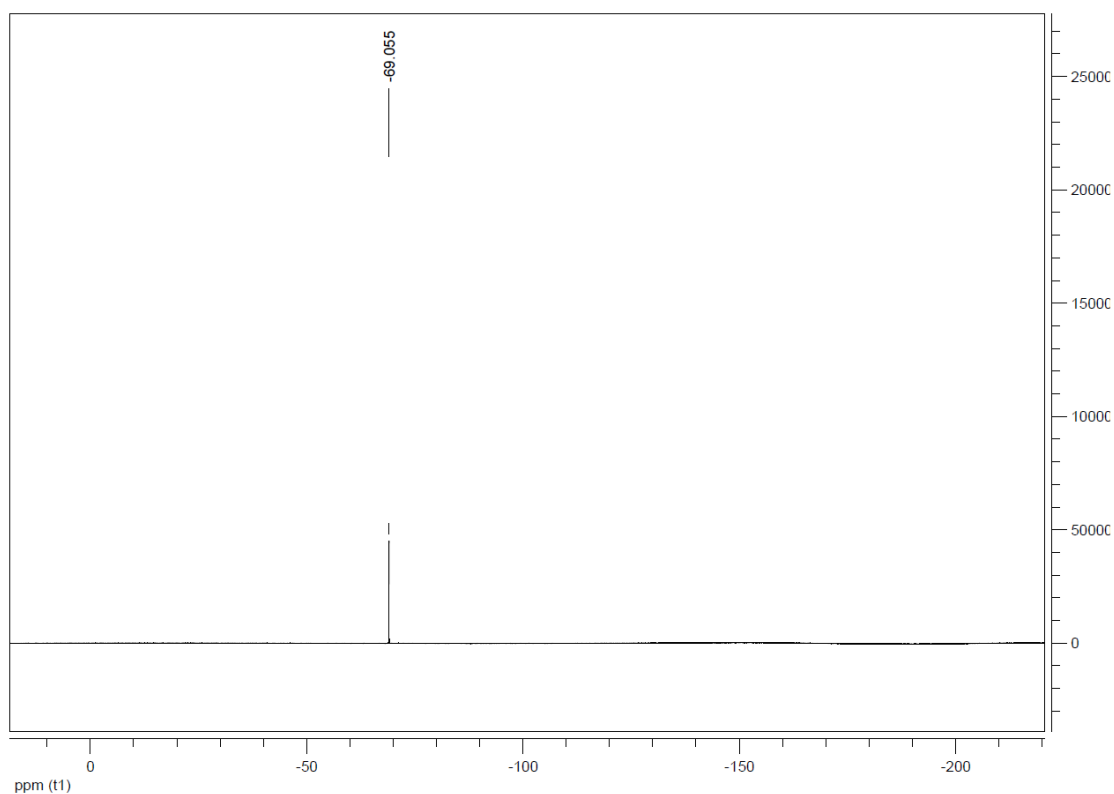

*N*-Methyl-*N*-(6'-(trifluoromethyl)-3'H-spiro[cyclobutane-1,2'-furo[2,3-*b*]pyridine]-4'-yl)methanesulfonamide (4t)

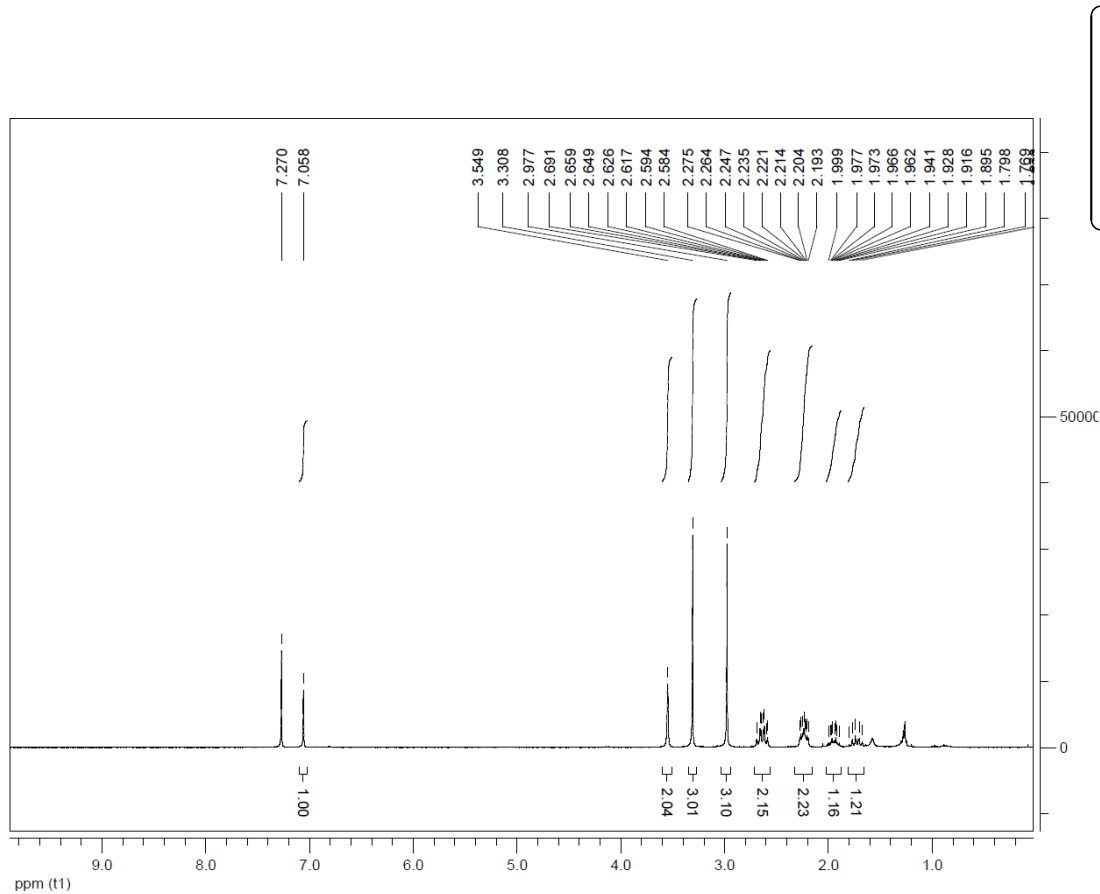

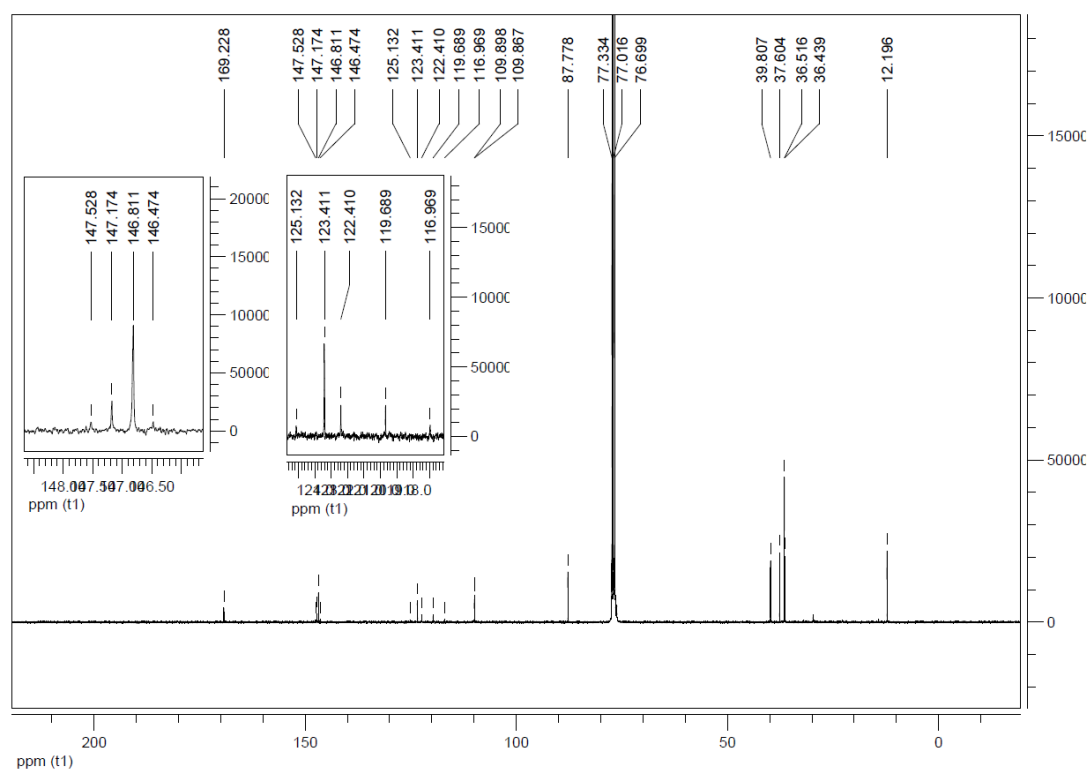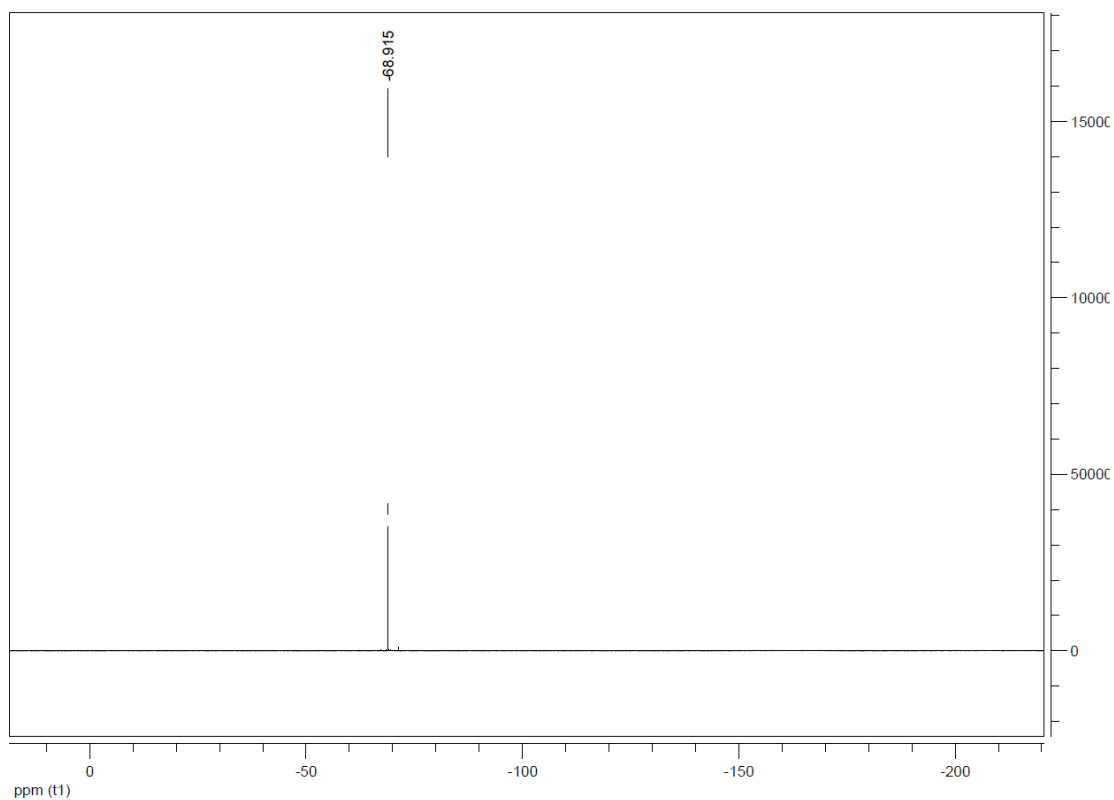



Methyl 1-(6'-(trifluoromethyl)-3'H-spiro[cyclobutane-1,2'-furo[2,3-b]pyridine]-4'-yl)-1H-indole-3-carboxylate (**4u**)

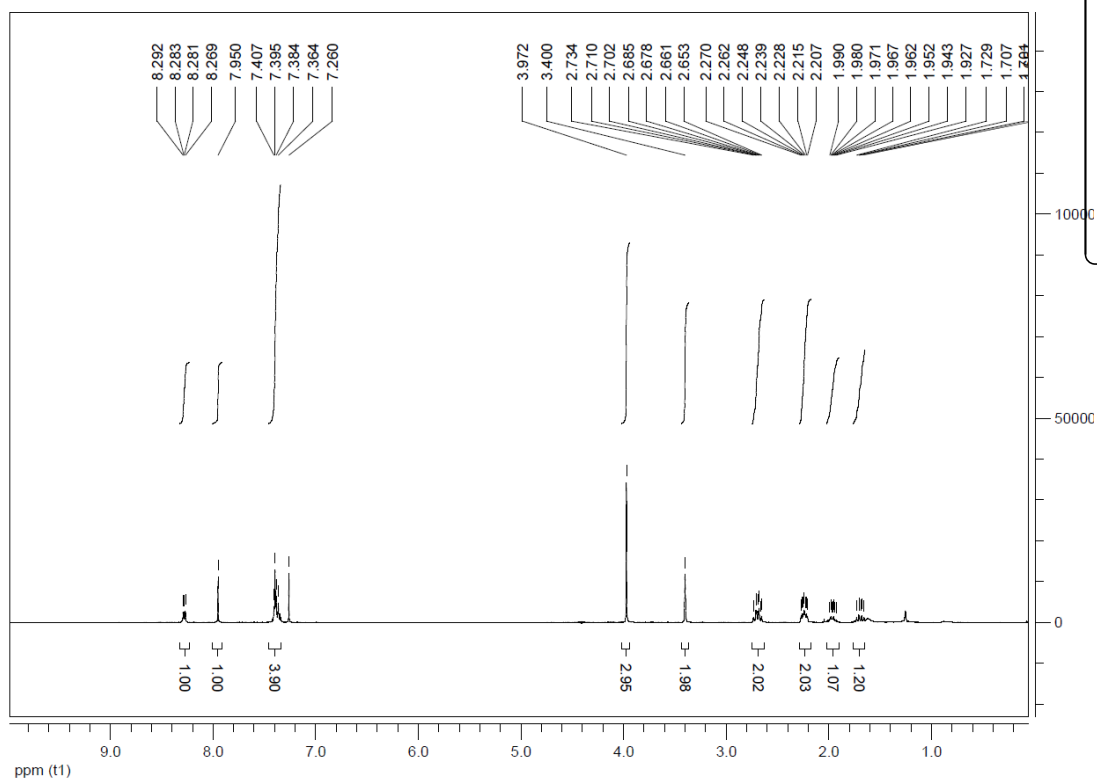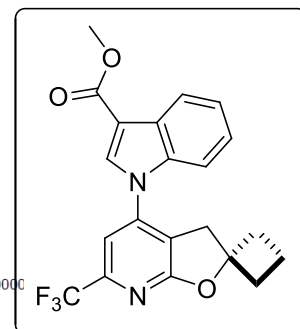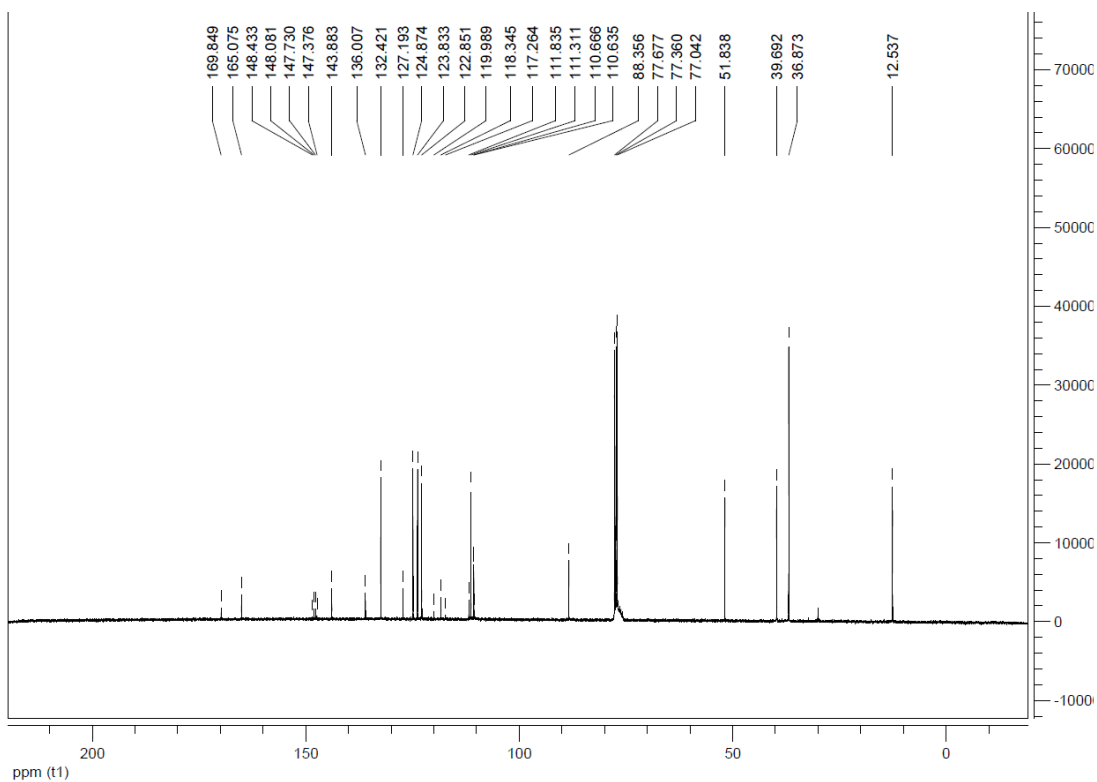

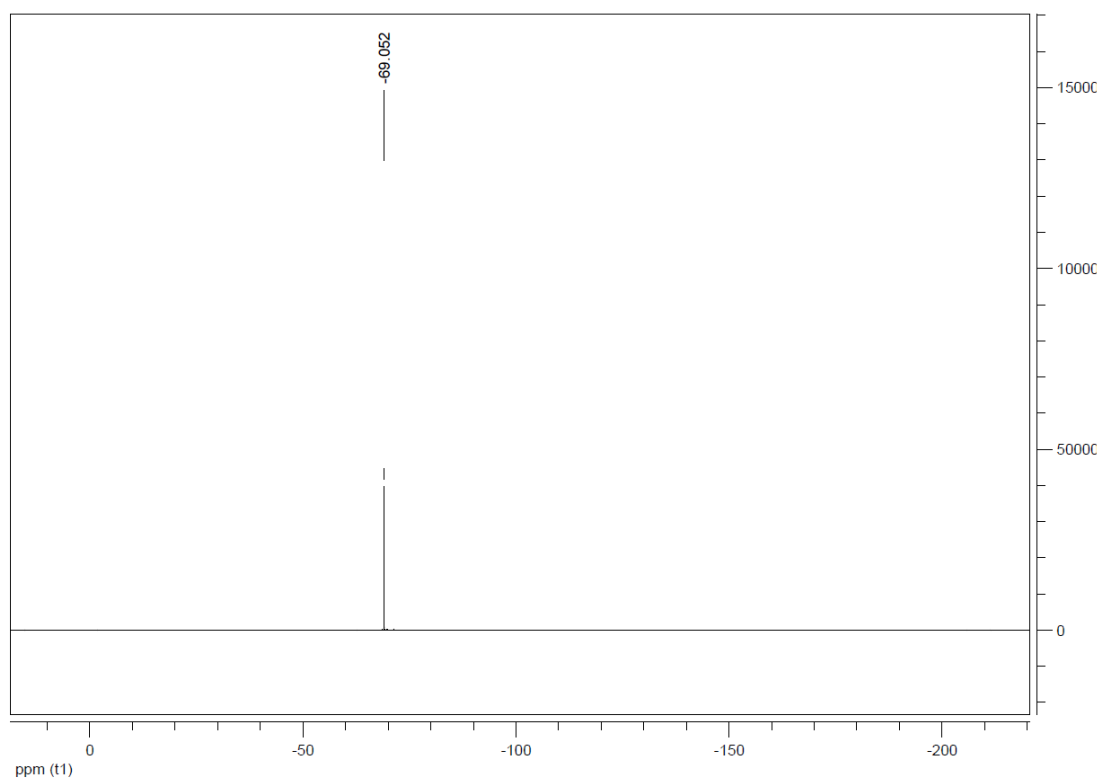

3-(6-(trifluoromethyl)-2,3-dihydrothieno[2,3-b]pyridin-4-yl)oxazolidin-2-one (**4v**)

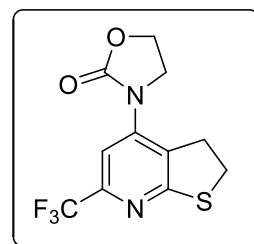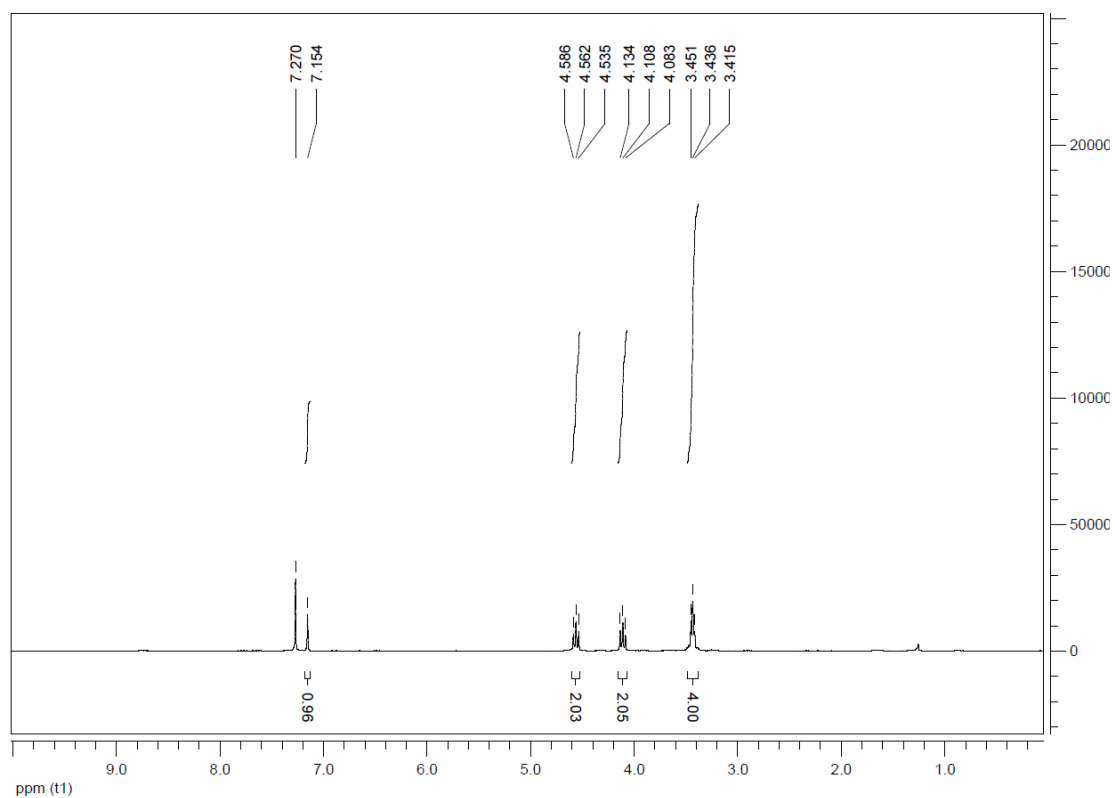

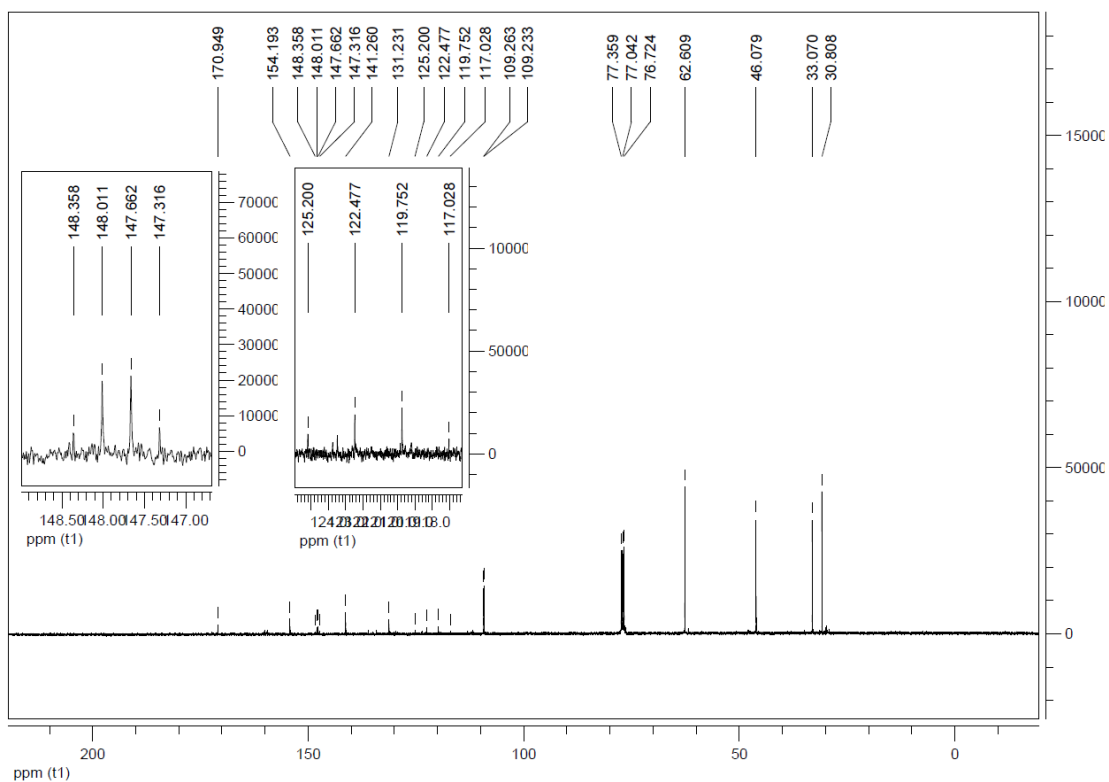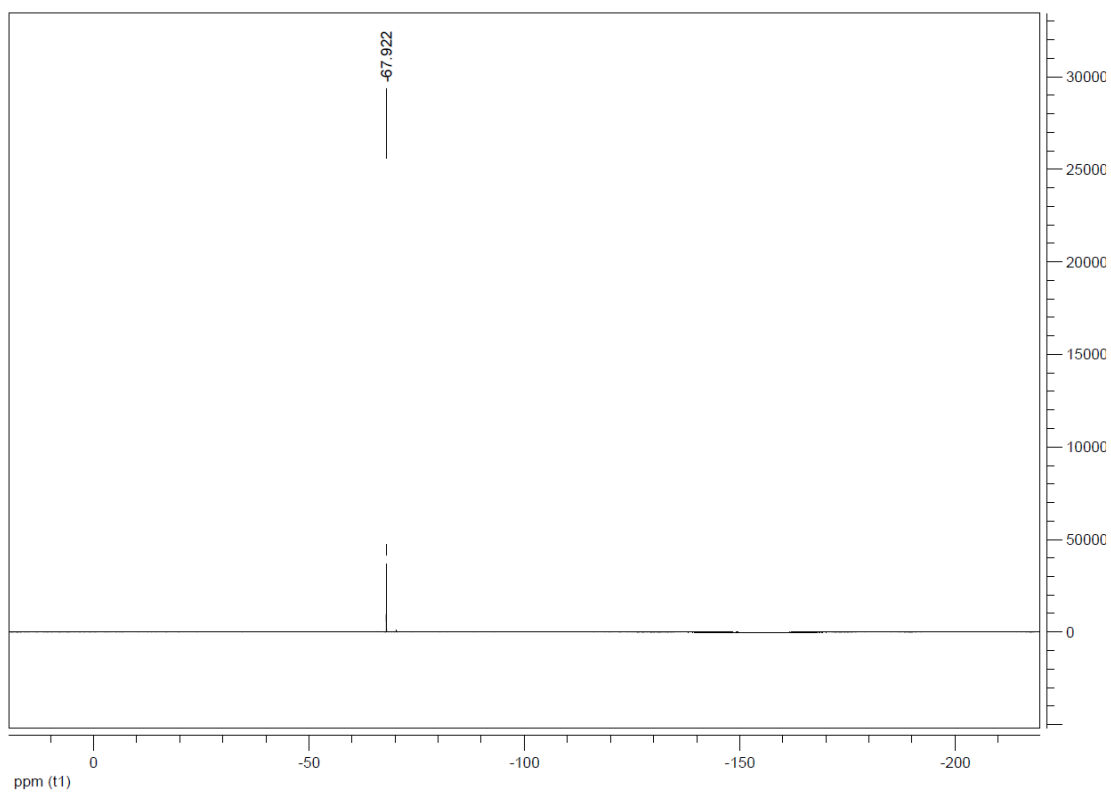

3-(1-acetyl-6-(trifluoromethyl)-2,3-dihydro-1H-pyrrolo[2,3-b]pyridin-4-yl)oxazolidin-2-one (**4w**)

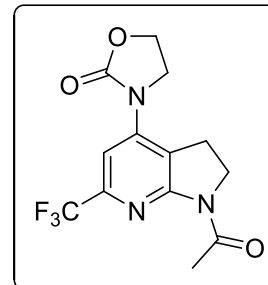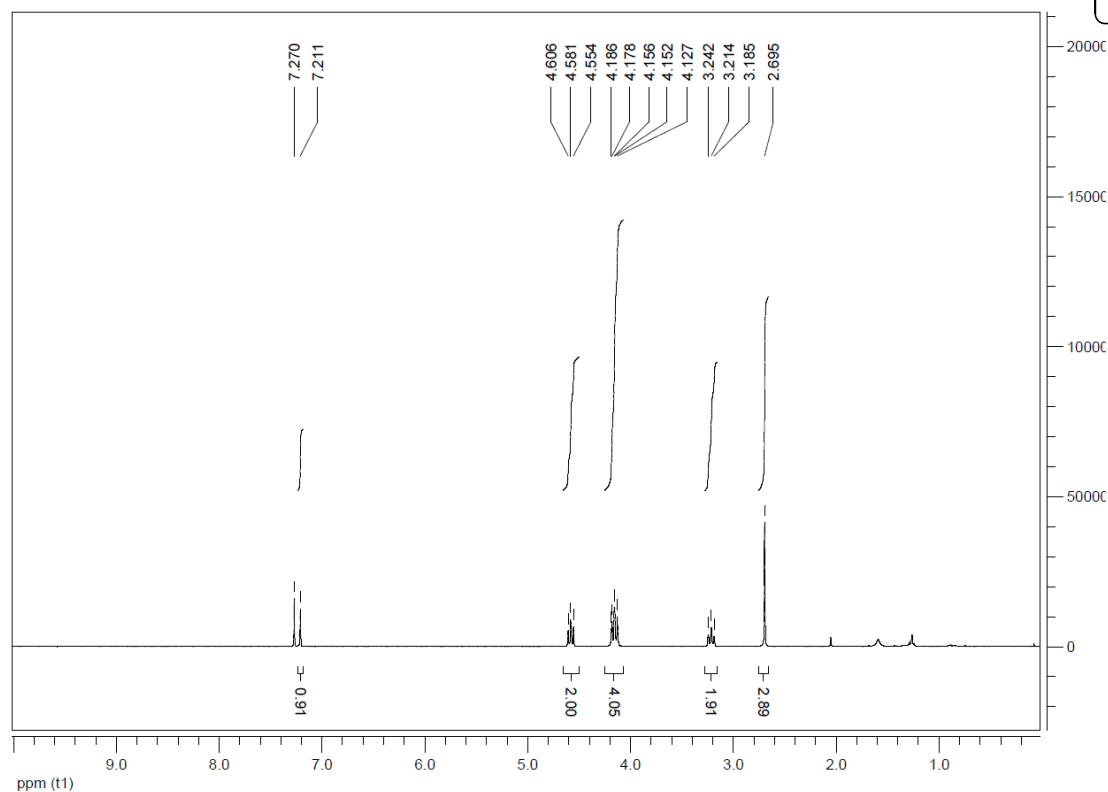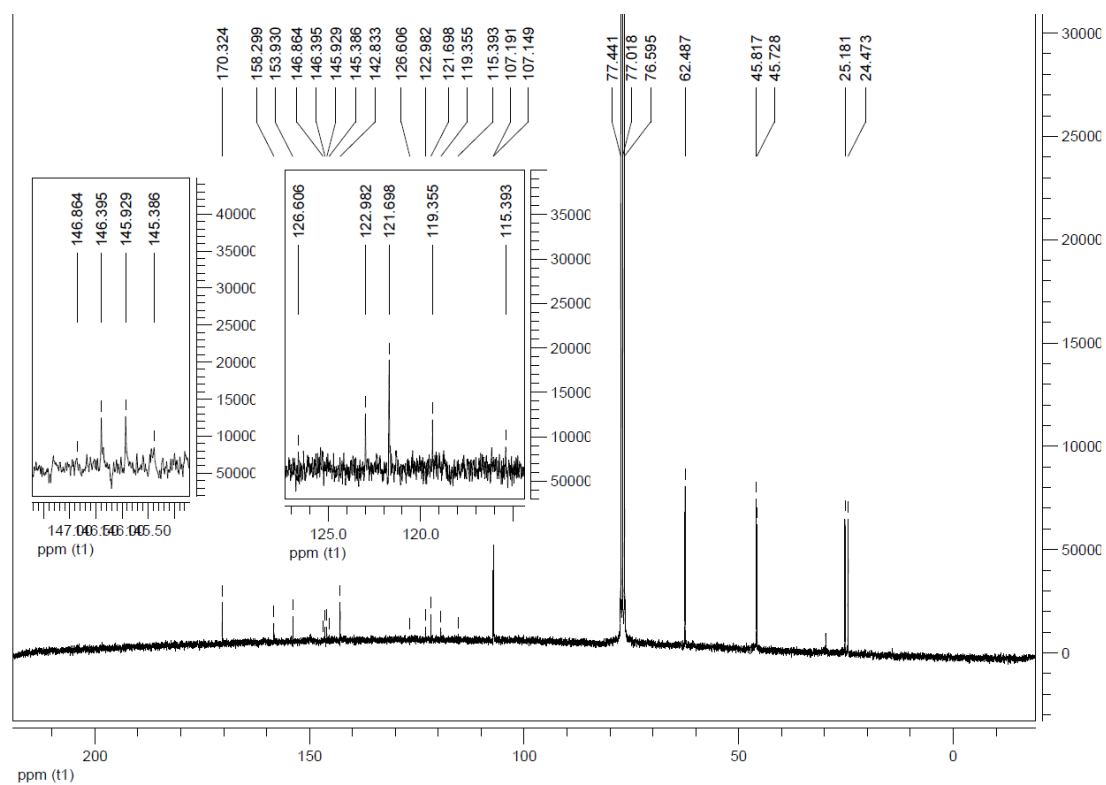

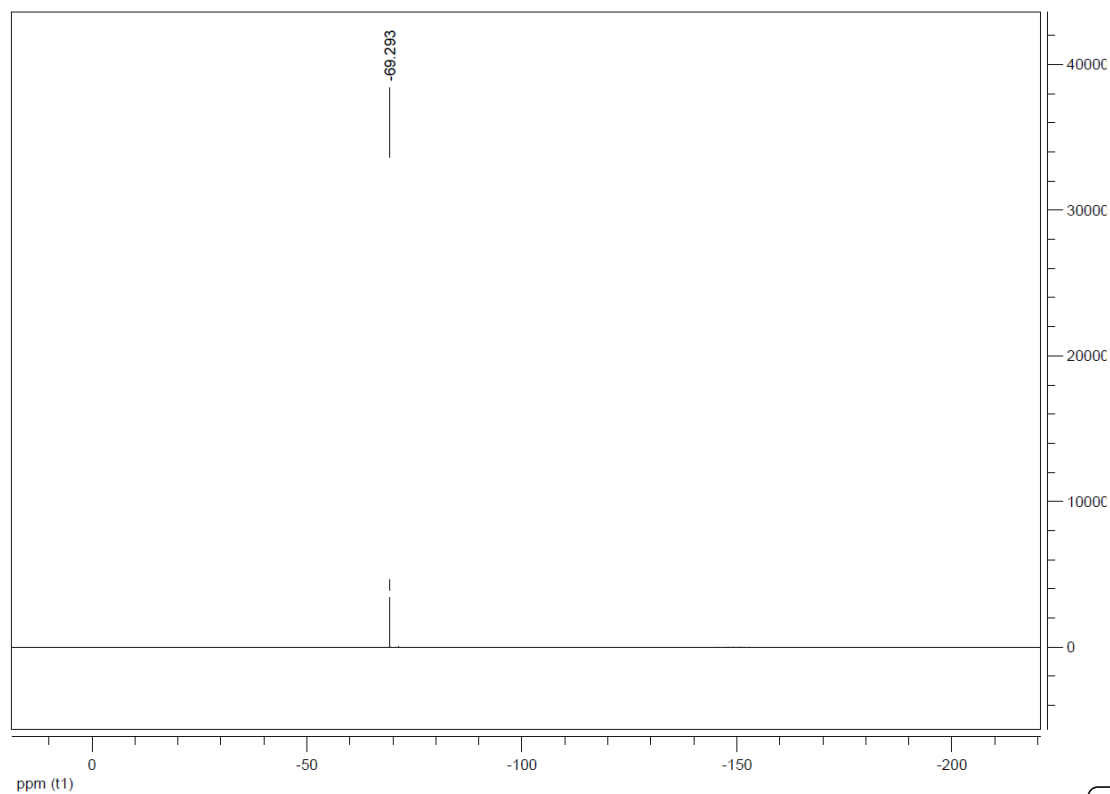

1-(1-acetyl-6-(trifluoromethyl)-2,3-dihydro-1H-pyrrolo[2,3-b]pyridin-4-yl)azetidin-2-one (4x)

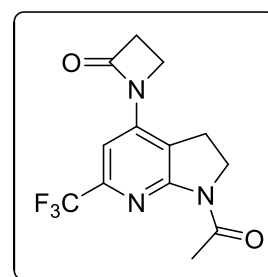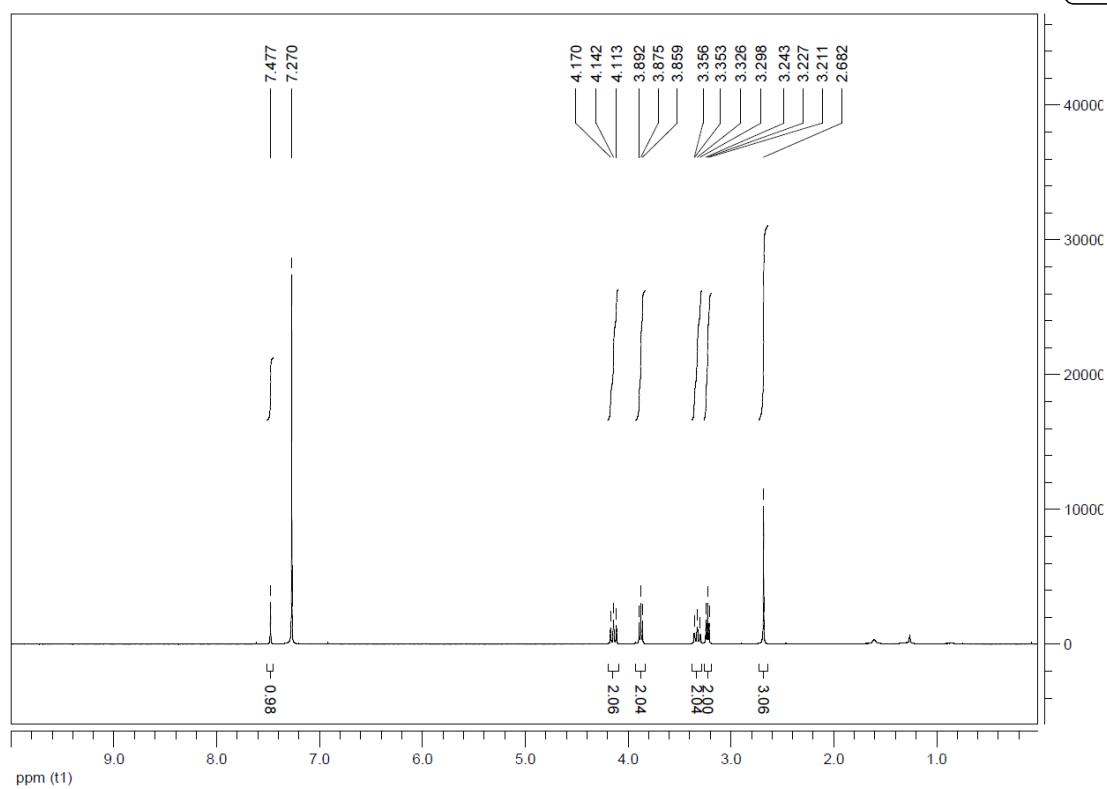

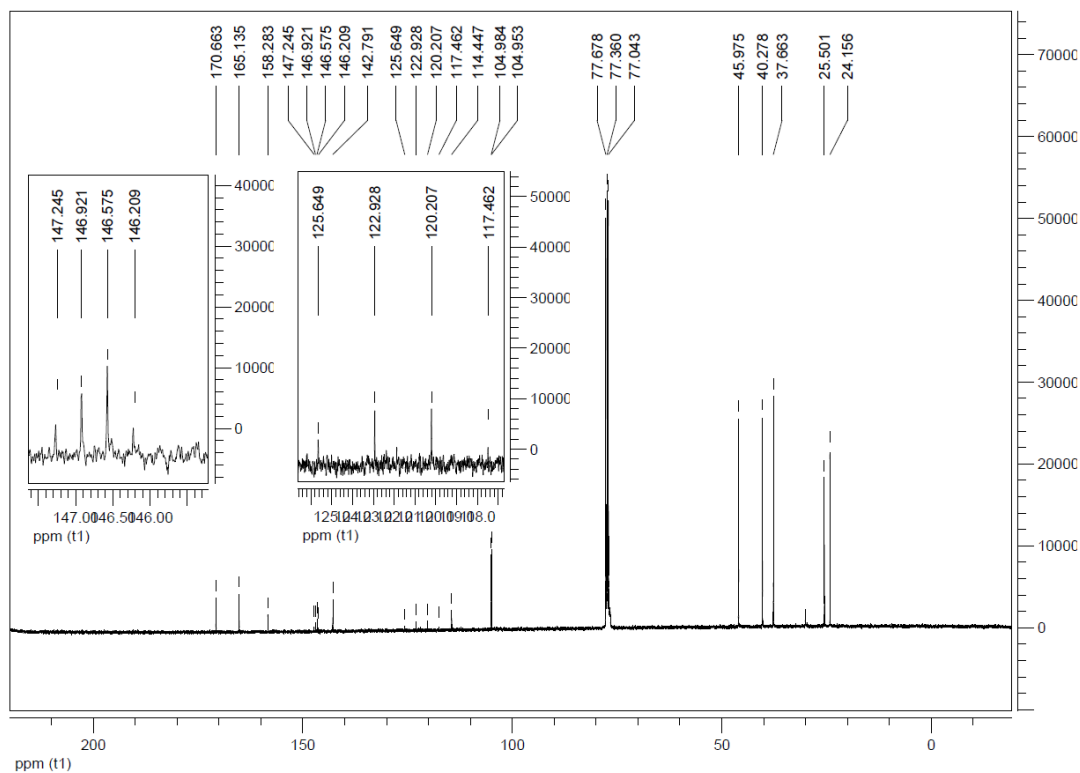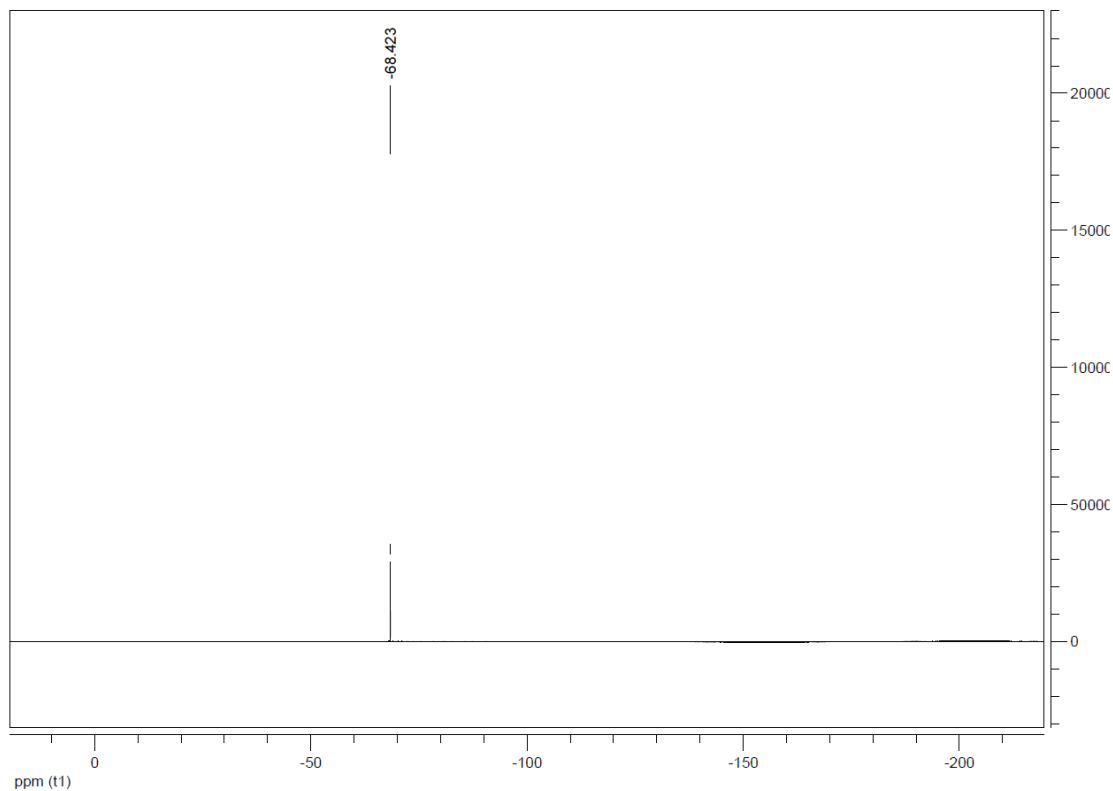

Supplement: Supplementary file 1 [file 4854763]
